# Supplementary material for: The structure-selective endonucleases GEN1 and MUS81 mediate complementary functions in safeguarding the genome of proliferating B lymphocytes
Source: eLife. 2022 Oct 3;11:e77073. doi: 10.7554/eLife.77073 (PMC9581529; doi:10.7554/eLife.77073)
Supplement: Figure 4—figure supplement 1—source data 1. [file elife-77073-fig4-figsupp1-data1.csv]

	baseMean	log2FoldChange	lfcSE	stat	pvalue	padj	ENSEMBL
ENSMUSG00000102331	1.35123299829575	0.136280865803917	2.53509484059686	0.0537576991683005	0.957128211929979	0.999803489356147	ENSMUSG00000102331
Gm6085	18.7802898784747	0.792099910699824	0.346058034769591	2.28892217811736	0.0220838744108184	0.999803489356147	ENSMUSG00000098104
Gm6123	23.4916080566759	0.133686935192893	0.323256105072337	0.413563527788522	0.679193788489806	0.999803489356147	ENSMUSG00000103922
Mrpl15	2949.8712018836	-0.0197932569511111	0.155313752043969	-0.12744046609284	0.898591790015665	0.999803489356147	ENSMUSG00000033845
ENSMUSG00000102275	22.5089678243381	0.894362068382483	0.689700713343106	1.29673936981643	0.194720878265662	0.999803489356147	ENSMUSG00000102275
Lypla1	1605.78865589926	-0.233757530620204	0.113849278560166	-2.05321925247572	0.0400513180251719	0.999803489356147	ENSMUSG00000025903
Tcea1	6575.09027226189	-0.152182342004062	0.119184566251446	-1.27686282536784	0.201650680509967	0.999803489356147	ENSMUSG00000033813
Gm6104	201.512726946217	0.170342236632822	0.198879912611917	0.856508002219501	0.391716848468872	0.999803489356147	ENSMUSG00000062588
ENSMUSG00000002459	1.25211058623052	1.11158782669714	1.15186829767573	0.965030315479758	0.334529627817056	0.999803489356147	ENSMUSG00000002459
Atp6v1h	1906.58330491402	-0.182122654185044	0.127326251877985	-1.43036217197039	0.152613099336737	0.999803489356147	ENSMUSG00000033793
Rb1cc1	1148.84580695838	0.0271461464612803	0.071993954120965	0.377061474018624	0.706127920956482	0.999803489356147	ENSMUSG00000025907
4732440D04Rik	33.6005742361528	-0.320097142507261	0.237773944277884	-1.34622463987545	0.178230080972352	0.999803489356147	ENSMUSG00000090031
Gm19026	1.40384566535719	0.414368472968519	1.14280409189382	0.362589245092604	0.716911745482055	0.999803489356147	ENSMUSG00000103845
St18	2.23180431953945	0.325069002207976	1.67486610117022	0.194086561296364	0.846108104080564	0.999803489356147	ENSMUSG00000033740
Gm37108	179.722567174693	0.672135763075271	0.515569364578009	1.30367669076965	0.192343840107694	0.999803489356147	ENSMUSG00000102135
Pcmtd1	1147.94621430487	0.18569664443443	0.155478152817051	1.19435844245549	0.232337785605012	0.999803489356147	ENSMUSG00000051285
Gm26983	1.38828544413074	0.876296558135066	1.85245800808918	0.473045302138302	0.636180859132214	0.999803489356147	ENSMUSG00000098201
Gm38372	10.1046032017219	0.519048211675992	0.487917568599283	1.0638030787989	0.287417916316609	0.999803489356147	ENSMUSG00000103509
Gm9826	182.796975982769	0.130193247970499	0.335989013457313	0.387492574923257	0.698391580785165	0.999803489356147	ENSMUSG00000048538
Gm26901	35.3904081181537	-0.197686036302984	0.322908037612891	-0.612205375141432	0.540401885726654	0.999803489356147	ENSMUSG00000097797
ENSMUSG00000103498	2.91903014643537	-0.867130310272977	0.733666897387973	-1.18191281814699	0.237240295346514	0.999803489356147	ENSMUSG00000103498
Gm7470	1.12487785884388	-1.42709602667298	3.01106717195092	-0.473950245935012	0.635535387418517	0.999803489356147	ENSMUSG00000104226
ENSMUSG00000103557	1.10387156726911	-0.9820544880013	2.50509123788418	-0.39202344136206	0.695040893590539	0.999803489356147	ENSMUSG00000103557
ENSMUSG00000102253	1.90038280049525	-1.46536562772354	2.50217299021565	-0.585637217511986	0.558119332434057	0.999803489356147	ENSMUSG00000102253
Gm15452	112.960528017548	0.334715575652239	0.232030623883768	1.44254913446214	0.14914752096019	0.999803489356147	ENSMUSG00000084353
Gm36964	3.82822949906799	0.424094658002867	0.782100872700198	0.542250587879646	0.587645890067922	0.999803489356147	ENSMUSG00000103933
Gm24276	1.21054596497163	-1.99214319716185	2.00851647223019	-0.991848075286054	0.321271641835702	0.999803489356147	ENSMUSG00000076135
Gm7493	3.6380062882888	0.850393638547519	0.859461679737161	0.989449161721306	0.322443431553904	0.999803489356147	ENSMUSG00000066693
Gm6187	2.05707901355588	0.270490189748398	0.96402277860859	0.280584853128478	0.779028834971689	0.999803489356147	ENSMUSG00000101571
Rrs1	5768.64718765018	-0.236018756937004	0.140432252757755	-1.6806591954637	0.0928291306677113	0.999803489356147	ENSMUSG00000061024
Adhfe1	2.71382491284367	-1.11129365032793	0.767168594599885	-1.44856509788116	0.147459074066689	0.999803489356147	ENSMUSG00000025911
Gm6161	6229.41714250318	0.124276190005673	0.159708931749284	0.778141764799763	0.436485443528583	0.999803489356147	ENSMUSG00000081441
Mybl1	152.83648783296	-0.0398783098522707	0.216095264702035	-0.184540415113942	0.853589524876572	0.999803489356147	ENSMUSG00000025912
Vcpip1	1721.43560302195	-0.00831020870854554	0.137389466112486	-0.0604865055792681	0.951768163158924	0.999803489356147	ENSMUSG00000045210
1700034P13Rik	6.52547874590546	0.208880188742588	0.643435475280484	0.324632689317502	0.745459083574297	0.999803489356147	ENSMUSG00000097893
Sgk3	1952.52958355397	-0.247627357070477	0.116971123036696	-2.11699563654519	0.0342602181210233	0.999803489356147	ENSMUSG00000025915
Gm6195	2.46915495628398	0.0421639673430627	0.838140930751997	0.0503065365215279	0.959878114976152	0.999803489356147	ENSMUSG00000046334
Mcmdc2	8.65951958123871	0.343608513574863	0.510435033188196	0.673167966996058	0.500840437807367	0.999803489356147	ENSMUSG00000046101
Snhg6	1755.5313244804	0.155836213455028	0.364632588452809	0.427378732428346	0.669103495350969	0.999803489356147	ENSMUSG00000098234
ENSMUSG00000093178	11.8765763521682	-0.369613695696159	0.52481892937592	-0.704268986897404	0.481265276075802	0.999803489356147	ENSMUSG00000093178
ENSMUSG00000099032	1.36197112201464	-0.487210424514845	0.988517476496766	-0.492869813735093	0.62210457757932	0.999803489356147	ENSMUSG00000099032
ENSMUSG00000025916	0.792273531010156	-0.589659638260751	1.50169168233227	-0.392663584141953	0.694567970317462	0.999803489356147	ENSMUSG00000025916
Cops5	3841.39324975402	-0.114376466978492	0.17518390238772	-0.652893704384732	0.513824807919541	0.999803489356147	ENSMUSG00000025917
Cspp1	777.667696889359	0.127144584813496	0.127589086344242	0.99651614770916	0.318999425236392	0.999803489356147	ENSMUSG00000056763
Arfgef1	2722.15762827716	0.0454937173020553	0.192060297845941	0.236872054309462	0.81275605050746	0.999803489356147	ENSMUSG00000067851
ENSMUSG00000042501	1.53936694915252	-1.66005239321417	2.1742164480184	-0.763517539722024	0.445154806041561	0.999803489356147	ENSMUSG00000042501
Prex2	1.15110275550133	-0.270187867964384	1.53377179642862	-0.17615910567238	0.860168947260075	0.999803489356147	ENSMUSG00000048960
ENSMUSG00000057715	1.45983562233274	-0.0331122330529009	2.60294009681705	-0.012721089161211	0.989850313109802	0.999803489356147	ENSMUSG00000057715
ENSMUSG00000103561	0.915876286149732	1.28608654306909	3.0377555473702	0.423367358898402	0.672027256034789	0.999803489356147	ENSMUSG00000103561
Slco5a1	28.0863677256086	0.361348625674329	0.48330321562074	0.747664435069451	0.454662588242208	0.999803489356147	ENSMUSG00000025938
Ncoa2	523.608888958303	0.213263881670442	0.268239923053732	0.795048996594449	0.426585001485309	0.999803489356147	ENSMUSG00000005886
Gm38120	3.89145541409461	1.20945219903798	1.57853790863863	0.766185083309808	0.443566182722168	0.999803489356147	ENSMUSG00000103085
Gm7593	2.15699185880448	0.132844532133131	1.032523024182	0.128660116067024	0.897626595802724	0.999803489356147	ENSMUSG00000101171
Tram1	2855.0859119575	-0.0975079205325817	0.127327601164684	-0.765803483617552	0.443793241100301	0.999803489356147	ENSMUSG00000025935
Lactb2	1525.984896072	0.0411339807594044	0.0828936511069039	0.496225949878307	0.619735004404271	0.999803489356147	ENSMUSG00000025937
Gm38319	2.81444767370132	1.05068123272643	0.974196093700293	1.07851103029537	0.280805761966702	0.999803489356147	ENSMUSG00000102982
Xkr9	0.858188743398504	-0.0853324203742401	1.29097050196511	-0.0660994346844856	0.947298660925309	0.999803489356147	ENSMUSG00000067813
Gm5523	16.6230023822243	0.762369141327884	0.291504535875421	2.61529083600159	0.00891515066027504	0.999803489356147	ENSMUSG00000097711
Eya1	38.5729109943867	0.0901112904598029	0.233559504945286	0.385817269483048	0.699632004509574	0.999803489356147	ENSMUSG00000025932
ENSMUSG00000103492	1.52455348909063	3.00850957426336	2.44611288178227	1.22991444780395	0.218729143339414	0.999803489356147	ENSMUSG00000103492
Smt3h2-ps4	756.232871138926	-0.0965825717044988	0.141068259400553	-0.684651332021184	0.493563966764109	0.999803489356147	ENSMUSG00000081201
Rpl5-ps1	7370.01440583134	-0.0265524690310551	0.22408087823142	-0.118495023942351	0.905675437638893	0.999803489356147	ENSMUSG00000082193
ENSMUSG00000032769	4.71609790782308	-0.202705114392357	0.577873751112974	-0.350777508066339	0.725755272301196	0.999803489356147	ENSMUSG00000032769
Gm10566	85.4447421460953	0.0585755911496773	0.191118049189311	0.306489059500892	0.759232308559625	0.999803489356147	ENSMUSG00000073737
Terf1	1305.20161406346	-0.0365293678362303	0.146185711908275	-0.249883298164946	0.802677599708075	0.999803489356147	ENSMUSG00000025925
Rpl7	49935.9952125275	-0.0360335899254647	0.236800776266217	-0.152168377543471	0.879054134542701	0.999803489356147	ENSMUSG00000043716
Rdh10	157.161255686327	-0.0247511309149267	0.115038630531214	-0.215154950998926	0.829646512261942	0.999803489356147	ENSMUSG00000025921
ENSMUSG00000104165	0.826068450959588	-0.597900678833716	2.05350269348854	-0.291161380371987	0.770927897578222	0.999803489356147	ENSMUSG00000104165
Stau2	637.720568205675	-0.104893824926953	0.13049721956794	-0.803801224840223	0.421511782288426	0.999803489356147	ENSMUSG00000025920
Ube2w	916.521570249778	-0.197242126165849	0.209859982062562	-0.939874883373659	0.347281742097408	0.999803489356147	ENSMUSG00000025939
Gm38342	2.27773421964897	0.267706785020931	0.926297347994292	0.289007396599585	0.772575717309402	0.999803489356147	ENSMUSG00000102457
Eloc	1838.01111416945	0.0320652339215249	0.244968624699183	0.130895268571232	0.895858157613184	0.999803489356147	ENSMUSG00000079658
Tmem70	2097.23353576386	-0.149581637206284	0.230897367770031	-0.647827381710407	0.517096603220353	0.999803489356147	ENSMUSG00000025940
Ly96	77.8181628915623	-0.185899652584339	0.301923814030884	-0.615717091349817	0.5380812550422	0.999803489356147	ENSMUSG00000025779
Gm5828	10.0158876631478	0.944734500151881	0.557510654678625	1.69455864605219	0.0901591775804304	0.999803489356147	ENSMUSG00000091020
Jph1	6.24759226625204	0.916640952755375	0.617360227263683	1.48477487255405	0.13760347027853	0.999803489356147	ENSMUSG00000042686
ENSMUSG00000025777	0.769489645702678	-0.1582668638796	2.06734886604397	-0.0765554698963103	0.938977184813442	0.999803489356147	ENSMUSG00000025777
Gm5251	0.769477884764627	-0.0588820668438053	1.74735606255464	-0.0336978067067335	0.973118127975282	0.999803489356147	ENSMUSG00000100398
Rbm6-ps1	16.2999095531388	-0.472923945135281	0.280083333363456	-1.6885115563859	0.091313072484982	0.999803489356147	ENSMUSG00000101589
ENSMUSG00000067780	1.30532053092576	-1.00791792556724	1.72212782922725	-0.58527474468577	0.558362993649741	0.999803489356147	ENSMUSG00000067780
Gm10075	820.452256770139	0.183339722944024	0.168340448136459	1.08910083686724	0.276109420910747	0.999803489356147	ENSMUSG00000100720
ENSMUSG00000025927	15.5636828468127	-0.163180382414796	0.352292398471191	-0.463195865488253	0.643223979536154	0.999803489356147	ENSMUSG00000025927
Gm4849	3.12248861113202	0.38048523965046	0.829602851406443	0.458635404887308	0.646496007551668	0.999803489356147	ENSMUSG00000100204
ENSMUSG00000043760	0.960694546035009	-1.5838141028658	3.03112878672818	-0.522516268460957	0.601310922394265	0.999803489356147	ENSMUSG00000043760
Gm15795	7.05942775079512	0.579035391145098	0.568725998900073	1.01812716890904	0.308617525324996	0.999803489356147	ENSMUSG00000090142
ENSMUSG00000041872	1.71434876828939	-0.0109507480220296	0.897430767172013	-0.0122023318372933	0.990264189427169	0.999803489356147	ENSMUSG00000041872
Mcm3	15007.2269559477	-0.0436060460891977	0.0960382079803184	-0.454048935379282	0.64979360587604	0.999803489356147	ENSMUSG00000041859
Paqr8	57.9962918876322	0.123284414801802	0.213328807526143	0.577907954539586	0.563326264572636	0.999803489356147	ENSMUSG00000025931
Efhc1	2.82582391165582	-1.01640915896968	0.69894195983289	-1.45421110389865	0.145887787421456	0.999803489356147	ENSMUSG00000041809
Tram2	160.205735446355	0.128344776303593	0.189651613369774	0.676739701936269	0.498571121785764	0.999803489356147	ENSMUSG00000041779
Tmem14a	16.4877128632693	0.1720040862008	0.312735134824967	0.549999239123125	0.582319895452899	0.999803489356147	ENSMUSG00000025933
Gm7094	4.74335865087837	1.17691095943819	0.69239071996232	1.69977864449459	0.0891725699138504	0.999803489356147	ENSMUSG00000096375
Gm4956	5.91666410248366	-0.154322887310585	0.604013375772431	-0.255495811021125	0.798340178599648	0.999803489356147	ENSMUSG00000025936
Kcnq5	329.380289725222	0.234428867842993	0.235484414370405	0.995517552487563	0.319484611748053	0.999803489356147	ENSMUSG00000028033
Gm7658	118.480852537469	0.0128671360298829	0.258909705507008	0.0496973877618296	0.960363538153201	0.999803489356147	ENSMUSG00000082935
Ogfrl1	1013.20437058507	0.14048123741516	0.179876999232808	0.780984995381986	0.434811319738411	0.999803489356147	ENSMUSG00000026158
B3gat2	8.18096514518192	-0.233138936945784	0.519500281504504	-0.448775381354173	0.653593699786388	0.999803489356147	ENSMUSG00000026156
Smap1	1246.5940440129	0.347764980968172	0.31855849996555	1.09168325756739	0.274972346671669	0.999803489356147	ENSMUSG00000026155
Sdhaf4	106.3677696687	0.0692885922000334	0.369083377778085	0.187731543525902	0.851087101720785	0.999803489356147	ENSMUSG00000026154
ENSMUSG00000102495	1.0225255708542	-0.673051445032412	2.16423316667358	-0.310988416311395	0.755809427759688	0.999803489356147	ENSMUSG00000102495
Fam135a	18.8822841027812	-0.268333237919979	0.339753368704714	-0.789788307156396	0.429651408885586	0.999803489356147	ENSMUSG00000026153
Tubb4b-ps2	16.4599219146938	0.639512492247382	0.461168220923747	1.38672281226664	0.16552630169971	0.999803489356147	ENSMUSG00000099997
Gm28439	64115.1459842893	0.589656735313354	0.404979904567591	1.45601480138366	0.145388527950907	0.999803489356147	ENSMUSG00000100131
Gm10222	7298.0236079537	0.339523720935053	0.274071816884272	1.23881296805654	0.215414770249931	0.999803489356147	ENSMUSG00000067736
Gm28438	14663.7348686534	0.326467056073468	0.595397613008621	0.548317710619947	0.583473768617753	0.999803489356147	ENSMUSG00000101939
Gm28437	52065.8119883095	-0.00618259138079137	0.191871632732456	-0.0322225401053022	0.974294581105939	0.999803489356147	ENSMUSG00000101111
Gm10925	143964.628062752	0.0305959430226889	0.271770303293759	0.112580155564743	0.910363418579201	0.999803489356147	ENSMUSG00000100862
Gm28661	126028.322188627	0.00692964806826328	0.191371322463941	0.0362104832586345	0.971114527040972	0.999803489356147	ENSMUSG00000102070
Gm29216	112792.303571566	0.0987250484559258	0.331302972258883	0.297990228650231	0.765710621440149	0.999803489356147	ENSMUSG00000101249
Lmbrd1	804.454959168729	-0.0497010070859465	0.100309795297205	-0.495475112262855	0.620264785640239	0.999803489356147	ENSMUSG00000073725
ENSMUSG00000100450	1.47783417479882	-0.650147200331812	2.59620855588596	-0.250421792524271	0.802261178399064	0.999803489356147	ENSMUSG00000100450
ENSMUSG00000033569	1.73885113292872	-1.52819762731141	1.57381083610069	-0.971017349898098	0.33153963889077	0.999803489356147	ENSMUSG00000033569
ENSMUSG00000102250	0.874987562968164	2.72394600436846	2.46603720308795	1.10458431079529	0.269339752430731	0.999803489356147	ENSMUSG00000102250
ENSMUSG00000103563	1.06604281677622	-1.71600458522531	1.75463130385807	-0.977985848908639	0.328081323070379	0.999803489356147	ENSMUSG00000103563
ENSMUSG00000102747	1.12931432189787	-1.41757641754472	2.0633604154573	-0.687023171969955	0.492068126409935	0.999803489356147	ENSMUSG00000102747
ENSMUSG00000101514	1.12998302667043	-2.38419601139405	2.47140727991055	-0.964711899481151	0.334689133447091	0.999803489356147	ENSMUSG00000101514
ENSMUSG00000101372	4.16293306563464	1.16970017516084	0.638636508505545	1.83155857766106	0.0670172129286499	0.999803489356147	ENSMUSG00000101372
Gm7846	738.768420046512	0.302526470791178	0.382892376006421	0.790108369214708	0.429464482595877	0.999803489356147	ENSMUSG00000086240
Gm5697	1.91561859837786	3.33446636048214	1.2791557578825	2.60677117695345	0.00914004178257095	0.999803489356147	ENSMUSG00000081557
Gm5525	1044.20428012021	0.144055078179814	0.125464455181973	1.14817442096152	0.250896566561068	0.999803489356147	ENSMUSG00000099492
Gm6473	3.46617704901695	0.349648635369866	0.656703412035094	0.532430057407988	0.594428172033564	0.999803489356147	ENSMUSG00000100261
Phf3	3359.91809580684	0.238080574645448	0.234805569088167	1.01394773373561	0.310607692675785	0.999803489356147	ENSMUSG00000048874
Gm37906	2.83353583311178	0.680650234557669	1.06160633831968	0.641151253519272	0.521424417065063	0.999803489356147	ENSMUSG00000104315
Ptp4a1	4.92134756622694	0.579771426143668	0.751838562277203	0.7711381874157	0.440625027766107	0.999803489356147	ENSMUSG00000026064
ENSMUSG00000117310	28.4304516281704	0.233103518983531	0.478070282805084	0.487592572405449	0.625838457701643	0.999803489356147	ENSMUSG00000117310
4931428L18Rik	2.70980721937594	-2.30008005843413	1.58067800891374	-1.45512245091255	0.145635364810765	0.999803489356147	ENSMUSG00000086727
Gm19680	71.9980701371883	-0.12431184351767	0.189765881462514	-0.655080052112666	0.512416214597555	0.999803489356147	ENSMUSG00000070960
ENSMUSG00000026058	0.760427692136576	-1.71307135107134	1.73548303902065	-0.987086195920437	0.323600384368422	0.999803489356147	ENSMUSG00000026058
ENSMUSG00000104498	1.27748435908938	-0.573859640111733	1.23325291877973	-0.465321939541446	0.64170092566228	0.999803489356147	ENSMUSG00000104498
ENSMUSG00000102926	1.2883302122121	-0.600399400196876	1.77311164383935	-0.338613421373073	0.734900970529953	0.999803489356147	ENSMUSG00000102926
Gm37724	23.2802646657659	-0.433319110923174	0.287067850172984	-1.509465830681	0.131179780951994	0.999803489356147	ENSMUSG00000102917
Gm7114	8.20468789873486	-0.0323243405349337	0.373310432272251	-0.0865883665189401	0.930998713340426	0.999803489356147	ENSMUSG00000100481
Prim2	1251.24710069096	-0.0835336363237758	0.155309391633964	-0.537853090820481	0.590678475734397	0.999803489356147	ENSMUSG00000026134
Gm29228	1.28765817042724	1.24973606396908	2.1858456350196	0.571740311368269	0.567497920146595	0.999803489356147	ENSMUSG00000101682
1700001G17Rik	6.02788252884891	0.0317694317514707	0.455668100516839	0.0697205525588391	0.944416083010337	0.999803489356147	ENSMUSG00000103746
ENSMUSG00000102198	1.24176567011906	-2.53891254717016	2.51513905861499	-1.00945215672022	0.31275783557686	0.999803489356147	ENSMUSG00000102198
Rab23	215.248121874558	0.01585702488996	0.126000737078767	0.125848667695073	0.899851716741465	0.999803489356147	ENSMUSG00000004768
Bag2	490.82965518588	-0.108040035932679	0.216100604827314	-0.499952492122888	0.617108529601828	0.999803489356147	ENSMUSG00000042215
Zfp451	1171.7256811219	-0.0526456307034406	0.126033431766795	-0.417711633853255	0.676157965314764	0.999803489356147	ENSMUSG00000042197
Gm15455	44.5517558529393	0.127123080712068	0.252110940784386	0.504234684605728	0.614096469599108	0.999803489356147	ENSMUSG00000081402
Bend6	8.79511360888839	-0.0904721906388719	0.36440211821056	-0.248275699063294	0.803921099818195	0.999803489356147	ENSMUSG00000042182
Dst	82.1871463690988	0.202564275577857	0.209235180988062	0.968117668459465	0.332985606800631	0.999803489356147	ENSMUSG00000026131
ENSMUSG00000096992	0.977221932851017	-0.606184482518574	1.32016585173514	-0.459172975669568	0.646109955368771	0.999803489356147	ENSMUSG00000096992
Gm3052	5.53082227964557	-1.3091739850098	0.816917307360246	-1.60257834326	0.109027778254027	0.999803489356147	ENSMUSG00000101462
Gm37233	5.01026829664712	0.130070355706589	0.577469085196809	0.225242110860808	0.821790931289772	0.999803489356147	ENSMUSG00000102336
Ccdc115	2411.36578311002	-0.0349909018686032	0.232106889536747	-0.15075339615485	0.880170250478639	0.999803489356147	ENSMUSG00000042111
Gm28306	1.65239036371333	-0.880591863935124	0.872658475029695	-1.00909105810857	0.312930965989742	0.999803489356147	ENSMUSG00000101711
Imp4	1752.00279248088	0.121809247658551	0.248138063426612	0.490893037434283	0.623502101779229	0.999803489356147	ENSMUSG00000026127
Gm28417	74.9667773874606	0.117731571634788	0.311699575432596	0.377708476090777	0.705647170458697	0.999803489356147	ENSMUSG00000100280
4930568A12Rik	12.2543885474752	-0.00889254711961382	0.442740394262036	-0.0200852400974978	0.983975374467477	0.999803489356147	ENSMUSG00000101223
Prss39	1.28301960137407	1.37437864123445	1.50953998011015	0.910461901866394	0.362578964982923	0.999803489356147	ENSMUSG00000026125
ENSMUSG00000026124	2.26096153357261	-1.18281598412426	0.834815739862337	-1.41685874815838	0.156524229378325	0.999803489356147	ENSMUSG00000026124
ENSMUSG00000045174	0.841219340794156	-0.712148638366774	1.28940001511346	-0.552310089979415	0.580735918801372	0.999803489356147	ENSMUSG00000045174
Arhgef4	57.242212312051	0.132117784693221	0.214719237101799	0.615304834706465	0.538353425307637	0.999803489356147	ENSMUSG00000037509
Gm38336	8.52466725711128	-0.131016213352097	0.464719331512842	-0.281925464399315	0.778000663423847	0.999803489356147	ENSMUSG00000104002
Fam168b	3593.86823781907	0.068399013129157	0.210962993128478	0.324222803795268	0.745769358842795	0.999803489356147	ENSMUSG00000037503
Gm37127	4.168179260577	0.580789026490545	0.759531577098453	0.764667387114125	0.444469630899013	0.999803489356147	ENSMUSG00000104358
Plekhb2	451.479213866062	0.0199383136272334	0.127933411764316	0.155849151150323	0.876151926922212	0.999803489356147	ENSMUSG00000026123
Gm37670	8.05778599903033	0.867853143336656	0.519831148901726	1.66949045891193	0.0950202196903565	0.999803489356147	ENSMUSG00000103548
Hs6st1	609.551575343962	0.250143315809577	0.355285717754833	0.704062401917854	0.481393913249538	0.999803489356147	ENSMUSG00000045216
Gm33280	3.05381240790103	-0.688620185358016	0.719980333511481	-0.956443048936468	0.338848444272515	0.999803489356147	ENSMUSG00000102202
Uggt1	2819.1399257409	0.0407436312911742	0.198383915120958	0.205377695395981	0.83727704533669	0.999803489356147	ENSMUSG00000037470
Neurl3	760.840279654732	-0.0702119725715923	0.116977910613893	-0.600215649289032	0.548362525501346	0.999803489356147	ENSMUSG00000047180
Arid5a	3955.66713015602	0.247600175763818	0.140210067572524	1.76592294726444	0.0774087767803313	0.999803489356147	ENSMUSG00000037447
Kansl3	1311.386007378	0.0576611333077796	0.130223957636504	0.442784372048729	0.657921708245872	0.999803489356147	ENSMUSG00000010453
Fer1l5	23.9164978258049	0.171967653855707	0.31297509303149	0.549461147818571	0.582689020420747	0.999803489356147	ENSMUSG00000037432
Lman2l	141.157581995192	0.120105073528456	0.160683235799196	0.747464867327851	0.454783002257038	0.999803489356147	ENSMUSG00000001143
Cnnm4	163.50956521385	0.14083675554038	0.193869231591597	0.726452332761422	0.467561519193974	0.999803489356147	ENSMUSG00000037408
Gm37909	1.18336482197879	-0.275217816459778	1.08403439504455	-0.253882918953386	0.799586011238483	0.999803489356147	ENSMUSG00000104316
Cnnm3	194.291545018164	-0.230999756380187	0.163844185035448	-1.40987460940533	0.158576711139543	0.999803489356147	ENSMUSG00000001138
Ankrd23	6.98130624782874	0.22718706636768	0.476693443679033	0.476589450474276	0.633654497042012	0.999803489356147	ENSMUSG00000067653
Gm42417	1.04328472368277	-1.19103504619977	1.43602164176787	-0.829399092296061	0.406878614958906	0.999803489356147	ENSMUSG00000109510
Ankrd39	71.0602936680914	0.0885443588994002	0.199113972890695	0.444691839622964	0.656542467370835	0.999803489356147	ENSMUSG00000079610
Sema4c	2.13180445480726	-0.259365228613801	0.892415664782287	-0.290632760998291	0.771332201443203	0.999803489356147	ENSMUSG00000026121
ENSMUSG00000087589	1.069199792666	-0.935987223045056	2.11407060433188	-0.442741704618168	0.65795257331119	0.999803489356147	ENSMUSG00000087589
Cox5b	6672.17277888529	0.167213232473504	0.226913649508391	0.736902486191431	0.461181652020563	0.999803489356147	ENSMUSG00000061518
Actr1b	1393.45932995733	-0.0511549031182456	0.0947480279758887	-0.53990467359662	0.589262774643159	0.999803489356147	ENSMUSG00000037351
ENSMUSG00000102416	1.51269105958787	0.749181785723947	1.37271487759004	0.545766493796019	0.585226457929177	0.999803489356147	ENSMUSG00000102416
Zap70	10.6070452221606	-0.56172354331642	0.491936606938135	-1.14186164516734	0.253511533617879	0.999803489356147	ENSMUSG00000026117
Tmem131	3213.64094182505	0.121586063577453	0.235033391579326	0.517313998493771	0.604936983680225	0.999803489356147	ENSMUSG00000026116
Gm38115	1.43691617972659	-0.121197042579832	1.52689768168892	-0.0793746981433452	0.936734593088121	0.999803489356147	ENSMUSG00000102930
Rpl12-ps1	114.424502050516	0.540551650839312	0.365966741164521	1.47705130012431	0.139661886443651	0.999803489356147	ENSMUSG00000080054
n-R5s210	0.89734901732186	0.357484702313265	1.33080074928447	0.268623760923996	0.78821922557741	0.999803489356147	ENSMUSG00000095944
Vwa3b	7.11690333459349	0.219790183154587	0.430368770556061	0.510701979770988	0.609559754233289	0.999803489356147	ENSMUSG00000050122
Inpp4a	69.8323538237301	0.502097590910075	0.171441194448147	2.92868696188382	0.00340397049114344	0.999803489356147	ENSMUSG00000026113
Coa5	1153.13524369447	0.141704888801522	0.0907761142405896	1.56103717356697	0.118514980164376	0.999803489356147	ENSMUSG00000026112
Unc50	446.728081530229	-0.104814039825886	0.128776537960391	-0.813921864075308	0.415689714433788	0.999803489356147	ENSMUSG00000026111
Mgat4a	585.239257908826	0.0901667005163942	0.202457938729829	0.44536016261984	0.656059496594894	0.999803489356147	ENSMUSG00000026110
4930594C11Rik	6.18146332592568	-0.347516049900689	0.651002059541413	-0.533817128236876	0.593468062195446	0.999803489356147	ENSMUSG00000103948
ENSMUSG00000026090	3.35566532536066	-0.396306564926038	0.83619223452512	-0.473941934118897	0.63554131475131	0.999803489356147	ENSMUSG00000026090
Tsga10	40.6719172811316	0.16063282633373	0.220491485505775	0.728521674953851	0.46629430534818	0.999803489356147	ENSMUSG00000060771
Lipt1	77.3570567775068	0.082431095726144	0.183519314168296	0.449168503597125	0.653310106434104	0.999803489356147	ENSMUSG00000037216
Mitd1	1067.75521000931	-0.0807969397782824	0.114337415809462	-0.706653541242589	0.479781807496652	0.999803489356147	ENSMUSG00000026088
Mrpl30	1724.90845608205	-0.0599187785547522	0.153141384503959	-0.391264443304045	0.695601778289686	0.999803489356147	ENSMUSG00000026087
ENSMUSG00000087374	0.723347473612251	3.09726041275209	2.31191293754272	1.33969595587112	0.180344212886686	0.999803489356147	ENSMUSG00000087374
Txndc9	2708.3516263507	-0.0946702777322715	0.195556661357797	-0.484106637303752	0.628310191065762	0.999803489356147	ENSMUSG00000058407
Eif5b	34926.5018082445	0.376340098552098	0.471066036683555	0.798911552192649	0.424341699955108	0.999803489356147	ENSMUSG00000026083
Rev1	592.613011119858	0.0869588135300905	0.372775790940738	0.233273768424288	0.815548826526086	0.999803489356147	ENSMUSG00000026082
Gm37062	1.98327953886237	-0.0145457570257378	1.01043346675919	-0.0143955614142425	0.98851440050251	0.999803489356147	ENSMUSG00000103804
Aff3	1700.4032786562	0.238614400114544	0.210006443649581	1.13622418420979	0.255862751495625	0.999803489356147	ENSMUSG00000037138
Gm16150	3.91112934240763	1.32845356630377	1.35824253732229	0.978068003173238	0.32804069175562	0.999803489356147	ENSMUSG00000085391
Gm16151	1.71314738560651	0.875794824249926	1.43936515080187	0.608459100015043	0.54288302442412	0.999803489356147	ENSMUSG00000085280
Gm16152	2.5166774464718	3.76689750913608	2.50812041145268	1.50188064812818	0.133127935254909	0.999803489356147	ENSMUSG00000087131
ENSMUSG00000102541	0.808687933347235	2.06351643856531	1.39812604225073	1.47591588755719	0.139966473872448	0.999803489356147	ENSMUSG00000102541
Chst10	724.562539134872	0.20780590827524	0.202156005506793	1.02794823114101	0.303974180130404	0.999803489356147	ENSMUSG00000026080
Pdcl3	1198.80422918862	-0.0381187911543728	0.104505801639463	-0.36475287071506	0.715295888423413	0.999803489356147	ENSMUSG00000026078
Gm37309	15.1517125295937	0.176847757034586	0.48590982931873	0.36395180003363	0.715894002498445	0.999803489356147	ENSMUSG00000103046
ENSMUSG00000103182	4.0899401836474	0.629995748281182	0.756143714059016	0.833169325576131	0.404749239715171	0.999803489356147	ENSMUSG00000103182
ENSMUSG00000026077	0.995256226595285	-1.62306188338519	1.8088496898039	-0.89728952744611	0.369564443243703	0.999803489356147	ENSMUSG00000026077
Rpl31	10918.6106535312	0.197303352973193	0.30052040381648	0.656538958644821	0.511477409375293	0.999803489356147	ENSMUSG00000073702
Tbc1d8	10.6492260547782	-0.0810231012844642	0.381647416003552	-0.2122983096097	0.831874314112162	0.999803489356147	ENSMUSG00000003134
Cnot11	1515.45962417851	-0.0485698748680005	0.0990251419802827	-0.490480234581955	0.623794112956085	0.999803489356147	ENSMUSG00000003135
Gm15832	11.8353588992372	-0.447443455691645	0.360494011512833	-1.24119525263103	0.214533628165583	0.999803489356147	ENSMUSG00000085894
Snord89	5.43835739526871	-0.237188062186751	0.492290814546504	-0.481804769006806	0.629944641249419	0.999803489356147	ENSMUSG00000077704
Rnf149	899.489169426885	-0.103822077323338	0.176231291697277	-0.589123965008887	0.555778118222917	0.999803489356147	ENSMUSG00000048234
ENSMUSG00000064936	0.735129779578241	-0.985571632473325	1.47500243090975	-0.668183056393639	0.504016749652672	0.999803489356147	ENSMUSG00000064936
Map4k4	3579.85722541823	0.191603093416111	0.272702013773369	0.702609748879026	0.482298985369403	0.999803489356147	ENSMUSG00000026074
ENSMUSG00000102985	1.55055594427081	1.52434580575738	1.15183951793524	1.32340120478752	0.185701991358571	0.999803489356147	ENSMUSG00000102985
Il1r2	208.31177707902	0.266158871218285	0.272738675028478	0.975875061321956	0.32912638194533	0.999803489356147	ENSMUSG00000026073
Gm16894	6.747832525519	0.0125154993121576	0.717000960100139	0.0174553452625916	0.986073356731103	0.999803489356147	ENSMUSG00000097899
Il1r1	4.34456214655652	0.372316723109284	0.583581007612001	0.637986360510249	0.523482558834168	0.999803489356147	ENSMUSG00000026072
ENSMUSG00000103560	0.871730394021576	0.43411922367641	1.75857647033182	0.246858314665439	0.805017878110349	0.999803489356147	ENSMUSG00000103560
Il1rl2	2.66273864576607	0.212941851851213	0.820815885641346	0.259427059802613	0.795305753502476	0.999803489356147	ENSMUSG00000070942
Il18r1	3.05652008783451	-0.895005975163506	0.788131540000352	-1.13560481942279	0.256121990955488	0.999803489356147	ENSMUSG00000026070
Il18rap	41.7451028130322	0.100579461208259	0.203556115649756	0.494111714046062	0.621227285460125	0.999803489356147	ENSMUSG00000026068
Mfsd9	2.63002393147749	0.0853047338245297	0.783025115700897	0.108942525742833	0.913248076690185	0.999803489356147	ENSMUSG00000041945
ENSMUSG00000045515	0.974752929590677	-0.183257789247861	1.77678262777886	-0.103140241458208	0.917851667247854	0.999803489356147	ENSMUSG00000045515
Mrps9	4121.28361565161	-0.00723843079680754	0.157472577030208	-0.0459662941530383	0.963337114868581	0.999803489356147	ENSMUSG00000060679
Gpr45	5.33290419216628	-0.717665132062634	0.537231723621254	-1.33585769512112	0.181595790753778	0.999803489356147	ENSMUSG00000041907
Tgfbrap1	279.929624313154	0.0713645260047234	0.294059178408416	0.242687633118548	0.808247388438622	0.999803489356147	ENSMUSG00000070939
8430432A02Rik	2.1049324070363	-0.0224400772393607	0.841759934546485	-0.0266585237885558	0.978732094586629	0.999803489356147	ENSMUSG00000041878
AI597479	493.426798784629	0.0270805178535377	0.173826407731152	0.155790585602055	0.876198091617824	0.999803489356147	ENSMUSG00000010290
Gm8210	1001.23587103327	0.164066241366573	0.224233185429694	0.731676897209376	0.464365800700052	0.999803489356147	ENSMUSG00000094497
Nck2	279.069139013504	-0.218419339574262	0.247486106517628	-0.882551924419661	0.377478413400082	0.999803489356147	ENSMUSG00000066877
Gm38228	5.79234841501533	-0.558397997247679	0.5012562116046	-1.11399716217014	0.265280404094343	0.999803489356147	ENSMUSG00000103945
ENSMUSG00000100764	6.40021307721922	-0.278536608416705	0.630519225223431	-0.441757518683118	0.658664682384816	0.999803489356147	ENSMUSG00000100764
ENSMUSG00000100480	1.85459154939843	-0.0810088964224322	0.88438508386509	-0.0915991211298967	0.927016549752624	0.999803489356147	ENSMUSG00000100480
Uxs1	836.727603397445	-0.0758799486740949	0.105180967516122	-0.721422805532418	0.470649419456277	0.999803489356147	ENSMUSG00000057363
Gm19587	3.9170352446362	0.589421868086379	0.748211176383005	0.787774744204913	0.430828476415717	0.999803489356147	ENSMUSG00000100701
Tpp2	3663.89319736191	-0.105817924173514	0.170395933037128	-0.621012029380172	0.534591708362212	0.999803489356147	ENSMUSG00000041763
ENSMUSG00000047343	4.45147723906597	-0.0419477268314026	0.63222156814213	-0.0663497244402334	0.94709939603095	0.999803489356147	ENSMUSG00000047343
Gm8251	18.3101371706321	0.307543290939518	0.337313474490785	0.91174327205218	0.361903879100649	0.999803489356147	ENSMUSG00000091844
Tex30	968.569940197668	-0.0965674429189237	0.225595184136807	-0.428056313739228	0.668610121574745	0.999803489356147	ENSMUSG00000026049
Poglut2	153.610372533947	-0.113381620330468	0.177533173638906	-0.638650332253291	0.523050430301326	0.999803489356147	ENSMUSG00000026047
Bivm	67.5099896134327	0.104879839225375	0.305241298829234	0.343596491128974	0.731149763902675	0.999803489356147	ENSMUSG00000041684
Ercc5	610.303957671144	0.198821126356343	0.30174040668069	0.658914490583095	0.509950680161693	0.999803489356147	ENSMUSG00000026048
Txn-ps1	8.53301601965679	0.033909265610207	0.39197505426178	0.0865087337613091	0.931062013563774	0.999803489356147	ENSMUSG00000101567
Wdr75	3502.18328600483	-0.132825964957336	0.133826068652106	-0.992526839465265	0.320940593487104	0.999803489356147	ENSMUSG00000025995
Gm5526	837.462931412647	0.196774060902419	0.300012463131621	0.655886288350927	0.51189729116794	0.999803489356147	ENSMUSG00000084817
Gm5269	2.05442985245865	-0.0650482826654119	0.734994320316236	-0.0885017487447039	0.92947789449744	0.999803489356147	ENSMUSG00000098549
ENSMUSG00000041144	1.62734096000082	0.258379653079033	2.2074258409579	0.11705020766039	0.906820266935589	0.999803489356147	ENSMUSG00000041144
Gm8326	1.94329280186844	0.0957217201011108	0.99938995709966	0.0957801501016738	0.923695182792378	0.999803489356147	ENSMUSG00000101262
ENSMUSG00000101337	5.92167294822213	-0.0634868316507395	0.609832129131679	-0.104105422817155	0.917085687459294	0.999803489356147	ENSMUSG00000101337
Slc39a10	656.402440220147	0.218347405409106	0.325805474917431	0.670177213763648	0.502744827681698	0.999803489356147	ENSMUSG00000025986
Gm28151	27.3565256276154	0.0120276765895563	0.445592050595698	0.0269925744264891	0.978465656624305	0.999803489356147	ENSMUSG00000100213
Gm28527	0.845663147995548	-0.120666983102355	1.45836803244482	-0.0827411054122385	0.934057399519646	0.999803489356147	ENSMUSG00000100160
Gm4852	40.742150012393	-0.0460258544592786	0.315094412787308	-0.1460700431091	0.883866094868102	0.999803489356147	ENSMUSG00000081185
Gm8337	8.68415133146959	0.00478952339446428	0.499573427283792	0.0095872260870743	0.992350617506419	0.999803489356147	ENSMUSG00000100033
ENSMUSG00000101702	1.3970805878949	1.20438162261635	1.00139440062304	1.20270457061375	0.229090664578343	0.999803489356147	ENSMUSG00000101702
Nabp1	5003.19909958155	-0.0546996908026869	0.183686183568903	-0.297788814269574	0.765864352381992	0.999803489356147	ENSMUSG00000026107
ENSMUSG00000099413	407.295994889704	0.00765488408095303	0.130174032519802	0.058805000757648	0.953107425327264	0.999803489356147	ENSMUSG00000099413
Myo1b	4.46799856802143	-0.567958005342035	0.778208005653197	-0.729828016694988	0.465495316824857	0.999803489356147	ENSMUSG00000018417
ENSMUSG00000100696	2.17134002113208	-0.298193038031284	1.59735411182065	-0.18667935670908	0.851912042517851	0.999803489356147	ENSMUSG00000100696
Stat4	1370.41866247902	0.0296398824604306	0.145437445488326	0.203798150888243	0.838511237895636	0.999803489356147	ENSMUSG00000062939
Gm28177	1.34780624783992	-0.315401281620713	1.19700735654875	-0.263491514814152	0.7921717627534	0.999803489356147	ENSMUSG00000101628
Gm3940	33.0984633469351	0.366863668629559	0.354539256806766	1.03476176921505	0.300780181156347	0.999803489356147	ENSMUSG00000078291
ENSMUSG00000109599	9.65963317270771	0.243255720811363	0.371888258565942	0.654109709592324	0.513041126396967	0.999803489356147	ENSMUSG00000109599
Stat1	2746.68508016183	0.0113180786905948	0.276685641053639	0.0409059127444949	0.967370903706145	0.999803489356147	ENSMUSG00000026104
Gls	4949.84129668828	-0.186305816497306	0.206813509836906	-0.900839682302319	0.367673565399963	0.999803489356147	ENSMUSG00000026103
Nab1	6237.4754762646	-0.0825267263296174	0.115080436800679	-0.717122115834119	0.473298750690855	0.999803489356147	ENSMUSG00000002881
Rps27a-ps1	1.49220949739363	-0.563243922084822	1.26711885202052	-0.444507570214654	0.656675656888628	0.999803489356147	ENSMUSG00000101501
Gm28178	2.4286843474319	-0.488467552974143	0.770732956861998	-0.633770164653287	0.526230826818968	0.999803489356147	ENSMUSG00000099878
Gm5527	416.262638257072	0.0256039302498094	0.0827362104478344	0.309464623907966	0.756968118323008	0.999803489356147	ENSMUSG00000100007
Nemp2	470.841144191383	-0.00895225159616215	0.108229090984655	-0.0827157607507892	0.93407755255197	0.999803489356147	ENSMUSG00000043015
Gm37242	2.12164175072997	-1.12220542111137	1.24694106507187	-0.89996668851923	0.368137978346625	0.999803489356147	ENSMUSG00000103630
Mfsd6	165.193532181279	0.218361146142452	0.160192474631259	1.36311737892239	0.172845520467562	0.999803489356147	ENSMUSG00000041439
Inpp1	338.585778964116	0.258610172188798	0.160102771892267	1.61527604508194	0.106250928842447	0.999803489356147	ENSMUSG00000026102
Hibch	674.694964056761	-0.0652806935799772	0.114592852457604	-0.5696750903738	0.568898088003757	0.999803489356147	ENSMUSG00000041426
1700019D03Rik	9.52572564875716	-0.125673746484878	0.451712844441666	-0.278216012741934	0.780846543537126	0.999803489356147	ENSMUSG00000043629
ENSMUSG00000060715	2.13686560254056	0.793224136377601	0.922314963851048	0.86003606952831	0.389769159971662	0.999803489356147	ENSMUSG00000060715
Pms1	784.297925829123	0.0272036962924434	0.0881479041704961	0.308614215487482	0.757615005996031	0.999803489356147	ENSMUSG00000026098
Ormdl1	726.331635138309	-0.166438677861917	0.147214251276692	-1.13058808110291	0.258228506428409	0.999803489356147	ENSMUSG00000026097
Osgepl1	297.258849640254	0.0562259911328469	0.100862836420762	0.557450029446852	0.577219991694444	0.999803489356147	ENSMUSG00000026096
Gm28551	1.82683773696291	0.52322732321029	1.17308808080242	0.446025606919807	0.655578748944722	0.999803489356147	ENSMUSG00000099913
Asnsd1	209.967258177835	-0.0045022361294278	0.368511931076216	-0.0122173415560232	0.990252214296993	0.999803489356147	ENSMUSG00000026095
Stk17b	3241.50781380389	-0.0385782989616522	0.125207926944251	-0.308113870288973	0.757995687357522	0.999803489356147	ENSMUSG00000026094
Hecw2	6.22629193432925	0.101363713943995	0.58793404973631	0.172406605791001	0.863117879270595	0.999803489356147	ENSMUSG00000042807
ENSMUSG00000102868	0.868580784616041	0.0134628752306478	2.59404318976266	0.00518991946000697	0.995859061980602	0.999803489356147	ENSMUSG00000102868
Ccdc150	12.7439888608142	0.0688055984624689	0.391383374844409	0.175801024991984	0.860450264352446	0.999803489356147	ENSMUSG00000025983
Gtf3c3	675.154051140339	-0.0196432543718509	0.0927570393736144	-0.211771036511096	0.832285665543404	0.999803489356147	ENSMUSG00000041303
Pgap1	143.673355156884	0.0326988747472524	0.123458150196844	0.264857967619931	0.791118879225495	0.999803489356147	ENSMUSG00000073678
Ankrd44	884.780593386208	0.0837767845758467	0.151377497740901	0.553429577223162	0.57996929045729	0.999803489356147	ENSMUSG00000052331
Gm37370	1.86009225817121	-0.514973607103899	0.871087859621214	-0.591184461378938	0.554396832920178	0.999803489356147	ENSMUSG00000102503
Sf3b1	15729.6946846329	-0.0296993579603693	0.133186027225655	-0.222991544826622	0.823542087087856	0.999803489356147	ENSMUSG00000025982
Coq10b	175.611200791359	-0.307620251032832	0.190038197112915	-1.61872852777094	0.105505686003664	0.999803489356147	ENSMUSG00000025981
Gm17971	3.05846659967278	0.476078892897058	0.635469927332068	0.749176117421965	0.453751061802164	0.999803489356147	ENSMUSG00000101122
Hspd1	45811.7902156311	-0.191371641926942	0.134176493631053	-1.42626802018809	0.153790991958187	0.999803489356147	ENSMUSG00000025980
Hspe1	38851.6226776486	0.149941133716155	0.35691550928028	0.420102600804632	0.67441050282332	0.999803489356147	ENSMUSG00000073676
Gm16581	4.63128769599148	0.114104897628962	0.644273226962702	0.177106377936714	0.859424832253068	0.999803489356147	ENSMUSG00000089670
Mob4	1204.99994171977	-0.0151691404865509	0.206877265622471	-0.0733243473656162	0.941548017449713	0.999803489356147	ENSMUSG00000025979
Gm6822	2.86036917149646	-0.61143480799772	0.708242730758299	-0.863312507765623	0.387965669079191	0.999803489356147	ENSMUSG00000061863
Rftn2	90.8882955246421	0.102805726422568	0.22260051335592	0.461839574728157	0.644196368737051	0.999803489356147	ENSMUSG00000025978
ENSMUSG00000097649	4.47910110039488	-0.285204007132338	0.617684932133299	-0.4617305559767	0.644274555927007	0.999803489356147	ENSMUSG00000097649
Mars2	532.784243565671	-0.162387929751598	0.168769446039618	-0.962187964481904	0.335955193722967	0.999803489356147	ENSMUSG00000046994
Boll	18.5250140370821	0.0439742295622177	0.318754878146138	0.137956255973146	0.890274989569373	0.999803489356147	ENSMUSG00000025977
Gm8292	19.7566063332398	0.0344443371120752	0.412856235177488	0.0834293736590111	0.933510133119223	0.999803489356147	ENSMUSG00000100215
Plcl1	7.96890424061523	0.239043234337127	0.585087433273393	0.408559850618821	0.682862699902738	0.999803489356147	ENSMUSG00000038349
Gm38056	241.654528647621	0.312853791268453	0.42820644296957	0.730614395007329	0.465014716922259	0.999803489356147	ENSMUSG00000102145
Gm28900	5.20536227799278	0.44030858943808	0.659173781083918	0.66797042308639	0.504152472443269	0.999803489356147	ENSMUSG00000100944
Satb2	1.66105428448829	-0.218141391276026	0.959295753387534	-0.227397432445322	0.820114716611087	0.999803489356147	ENSMUSG00000038331
4930558J18Rik	45.2865908223715	0.157040520010707	0.198881609313762	0.789618107740443	0.429750829934761	0.999803489356147	ENSMUSG00000097519
1700066M21Rik	261.17518801355	-0.113942649448648	0.112323604969403	-1.0144141071655	0.310385195625845	0.999803489356147	ENSMUSG00000038323
Tyw5	487.317904314211	-0.0867606362925306	0.309313524784164	-0.28049415670741	0.779098407886561	0.999803489356147	ENSMUSG00000048495
Maip1	623.880729838096	-0.188524188642648	0.19925170883495	-0.946160962658602	0.344066493706412	0.999803489356147	ENSMUSG00000025971
Kctd18	396.808293685902	0.0935874408851283	0.147087942837728	0.636268609646521	0.52460136104224	0.999803489356147	ENSMUSG00000054770
Sgo2a	318.465360761001	0.19894625522759	0.107573927792879	1.84939101238953	0.0644013722794621	0.999803489356147	ENSMUSG00000026039
Aox4	3.1195721373473	0.614667710745411	0.688084191914347	0.893303055016159	0.371694902412063	0.999803489356147	ENSMUSG00000038242
Gm37607	26.6128195735996	0.251627235516958	0.491509930516544	0.51194740918564	0.608687816696841	0.999803489356147	ENSMUSG00000103839
Bzw1	16020.0483478176	-0.184411959714167	0.11200271422901	-1.64649545311111	0.0996617954443489	0.999803489356147	ENSMUSG00000051223
Clk1	3380.47414117872	-0.0332241601289231	0.160141609196525	-0.20746738024938	0.835644865233405	0.999803489356147	ENSMUSG00000026034
Ppil3	725.592350522659	-0.147322217833408	0.138366922169682	-1.06472136203726	0.287002040167826	0.999803489356147	ENSMUSG00000026035
Nif3l1	510.543782653548	-0.0857011407351632	0.0802620321831467	-1.06776689306352	0.285625675521083	0.999803489356147	ENSMUSG00000026036
Orc2	2679.90954054082	-0.0304713825904576	0.15387628874195	-0.198025198291323	0.843025348719179	0.999803489356147	ENSMUSG00000026037
ENSMUSG00000094245	9.68508598297758	0.296821510944715	0.368193924086802	0.806155374999451	0.420153265741408	0.999803489356147	ENSMUSG00000094245
Fam126b	195.258913020771	0.0453658875578905	0.147592474460007	0.307372633488731	0.758559755923398	0.999803489356147	ENSMUSG00000038174
Ndufb3	1017.14487293215	0.244253473176875	0.382143926311131	0.639166178917654	0.522714831527638	0.999803489356147	ENSMUSG00000026032
Cbx3-ps7	926.539638493222	0.0774735988220547	0.17442160414195	0.444174328078098	0.656916551265371	0.999803489356147	ENSMUSG00000059647
ENSMUSG00000047528	1.20593797675638	-0.21172106669462	0.978677617506281	-0.21633381913249	0.828727549298526	0.999803489356147	ENSMUSG00000047528
Gm20257	76.8908202022624	0.340965560782475	0.339369366223346	1.00470341379628	0.315039683856087	0.999803489356147	ENSMUSG00000102059
Cflar	5783.59645931443	0.15241633724889	0.0681411644003131	2.23677330128204	0.0253011603653732	0.999803489356147	ENSMUSG00000026031
Casp8	3754.72359753493	-0.219097631283967	0.213642323255849	-1.0255347720666	0.305110927072839	0.999803489356147	ENSMUSG00000026029
Gm28802	13.902983465962	0.409586130918265	0.469260238208379	0.872833659382804	0.382753750241539	0.999803489356147	ENSMUSG00000099719
Trak2	1539.44723859649	0.106643522919943	0.261178392742151	0.408316789916184	0.68304111430228	0.999803489356147	ENSMUSG00000026028
Stradb	194.990714280268	0.0823254183547316	0.124221937024995	0.662728502922688	0.507504451484523	0.999803489356147	ENSMUSG00000026027
ENSMUSG00000072295	0.87145483012321	-0.415188730097973	1.47008027787419	-0.2824258894884	0.777616965726207	0.999803489356147	ENSMUSG00000072295
Tmem237	134.550220685043	0.230072209723586	0.330051023688913	0.697080733615415	0.485752270689488	0.999803489356147	ENSMUSG00000038079
G730003C15Rik	6.06153651743091	-0.103281579747036	0.442952253419465	-0.233166394232633	0.815632200208065	0.999803489356147	ENSMUSG00000097573
ENSMUSG00000079550	1.53880609106992	0.266824347104721	1.21269149838712	0.22002656690477	0.825850464258882	0.999803489356147	ENSMUSG00000079550
Gm29017	3.02102015221752	-0.205351550064084	0.790504491305057	-0.259772780955445	0.795039047985555	0.999803489356147	ENSMUSG00000101586
Als2	419.332113439326	0.148127707614415	0.226840538273167	0.653003685946276	0.513753902251307	0.999803489356147	ENSMUSG00000026024
ENSMUSG00000026023	1.6109792739396	1.16544790977867	1.60230848100175	0.727355514619782	0.46700819841664	0.999803489356147	ENSMUSG00000026023
Fzd7	53.5355555365739	0.553607886140412	0.463977466067886	1.19317839039065	0.232799515923868	0.999803489356147	ENSMUSG00000041075
ENSMUSG00000097819	2.60927386409756	1.43739165972143	1.06514117881431	1.34948463951183	0.177181350846842	0.999803489356147	ENSMUSG00000097819
ENSMUSG00000047361	3.06809055189721	-1.24181411459387	0.850130324715195	-1.46073381750015	0.144088504624506	0.999803489356147	ENSMUSG00000047361
Sumo1	3478.23249714293	0.074610420067858	0.187979114481993	0.396908030306766	0.691435282259303	0.999803489356147	ENSMUSG00000026021
D430013B06Rik	7.48268686125355	0.671942859410274	0.55412135706766	1.21262761458268	0.225272226119586	0.999803489356147	ENSMUSG00000103821
ENSMUSG00000101400	0.834390257904793	-1.26960533376915	1.73999844164301	-0.72965889128631	0.46559871490508	0.999803489356147	ENSMUSG00000101400
Nop58	31787.4000764368	0.152695032810058	0.296151229736008	0.515598172414045	0.606135087021045	0.999803489356147	ENSMUSG00000026020
ENSMUSG00000077345	0.972806235917072	-0.533138343727684	1.7419223607761	-0.306063206795363	0.759556521210528	0.999803489356147	ENSMUSG00000077345
Gm26287	2.65009693952682	-0.748654768140133	0.746261999127285	-1.00320633908151	0.315761315084164	0.999803489356147	ENSMUSG00000089512
ENSMUSG00000089093	1.39458894179429	0.646741782489722	0.901894692878592	0.717092347472969	0.473317117283176	0.999803489356147	ENSMUSG00000089093
Bmpr2	37.6675734372319	0.0956025974934698	0.229666897783006	0.416266333617642	0.677215124973752	0.999803489356147	ENSMUSG00000067336
ENSMUSG00000104052	0.845506254381548	0.552698018189389	2.58783244937416	0.213575658007941	0.830877983495144	0.999803489356147	ENSMUSG00000104052
Fam117b	711.474697946716	0.0541851857619559	0.169093591254014	0.320444940344062	0.748631062629882	0.999803489356147	ENSMUSG00000041040
Gm37531	3.09935447596289	1.29131136373009	1.86273550354249	0.693233881715527	0.488162788570961	0.999803489356147	ENSMUSG00000103696
Ica1l	3.43370701115125	-0.390124345743141	0.664058440855748	-0.587484958764175	0.556878049402746	0.999803489356147	ENSMUSG00000026018
Wdr12	3599.95886375494	-0.103070175833985	0.0952514656540931	-1.082084933037	0.279214790085915	0.999803489356147	ENSMUSG00000026019
Carf	104.14495795879	0.133029697453779	0.140358348407137	0.947786141426375	0.343238337094343	0.999803489356147	ENSMUSG00000026017
Gm15464	3.26769617861909	0.618227361772641	1.04698318353019	0.590484519233749	0.554865861459721	0.999803489356147	ENSMUSG00000082609
Nbeal1	87.5389335665219	0.294689308111552	0.215763512179803	1.36579769736959	0.172002469337527	0.999803489356147	ENSMUSG00000073664
Cyp20a1	318.416573811573	-0.237586444263709	0.252785293305732	-0.939874472746165	0.34728195275055	0.999803489356147	ENSMUSG00000049439
Abi2	86.7092084113155	0.0107115704025985	0.196439951337925	0.0545284720834203	0.956514124886284	0.999803489356147	ENSMUSG00000026782
Raph1	29.219795489054	0.183518112449421	0.29716462196195	0.617563797594049	0.536862914789161	0.999803489356147	ENSMUSG00000026014
Gm11575	22.4404671114453	0.0377214860307485	0.353891109981686	0.10659065731462	0.915113730739916	0.999803489356147	ENSMUSG00000081562
Eif4a-ps4	7049.55451140163	-0.136162347072264	0.103899358301096	-1.31052154025505	0.190019462166418	0.999803489356147	ENSMUSG00000101188
Cd28	7.03844485674232	0.677491051922533	0.537149970803982	1.26126982918475	0.207211647497307	0.999803489356147	ENSMUSG00000026012
Ctla4	269.645163808893	0.25490628992799	0.204778045046015	1.24479306300005	0.213207826731208	0.999803489356147	ENSMUSG00000026011
Rpl18-ps1	73.0867820070178	0.554346484279143	0.269329950686071	2.05824299476178	0.0395668132807224	0.999803489356147	ENSMUSG00000081382
Icos	1.0647979899248	1.08126946202938	2.13770568060373	0.505808386926311	0.61299117024838	0.999803489356147	ENSMUSG00000026009
Pard3b	67.3944277128132	0.0145808376766922	0.24317329542396	0.0599606862721963	0.952186946133865	0.999803489356147	ENSMUSG00000052062
ENSMUSG00000103656	1.7434510492493	-2.98693219321462	2.07056336597028	-1.44256980602713	0.149141694096945	0.999803489356147	ENSMUSG00000103656
ENSMUSG00000100750	1.91369716195094	-0.67745578376351	1.08609864230899	-0.623751616449194	0.532790719119311	0.999803489356147	ENSMUSG00000100750
Gm11599	25.844450629456	0.0667485078936439	0.295299787860717	0.226036423450216	0.821173091517196	0.999803489356147	ENSMUSG00000084333
Nrp2	795.563901458979	0.222026245036895	0.159427328860415	1.39264859183138	0.163726081329899	0.999803489356147	ENSMUSG00000025969
ENSMUSG00000100811	2.17811877741503	0.899285315784684	0.758018113809877	1.1863638868269	0.235478626830231	0.999803489356147	ENSMUSG00000100811
Ino80d	701.861316613284	0.107741484877365	0.095797168371398	1.12468339836163	0.2607232191531	0.999803489356147	ENSMUSG00000040865
Ino80dos	36.8050464487383	-0.0114497076336663	0.346398590668302	-0.0330535629823913	0.973631873867639	0.999803489356147	ENSMUSG00000084799
Gm20342	55.3534682949004	0.740613707427297	0.447978819025355	1.65323376011083	0.0982832981323268	0.999803489356147	ENSMUSG00000101599
Ndufs1	2689.40796399251	-0.104727642042805	0.129418579491468	-0.809216439048529	0.418390660732586	0.999803489356147	ENSMUSG00000025968
Eef1b2	73519.1329047503	0.212930951670931	0.400239088966263	0.532009385242427	0.594719495305992	0.999803489356147	ENSMUSG00000025967
ENSMUSG00000064612	4.7609703348997	-0.178146246151047	0.726179402055561	-0.245319883277847	0.806208757420355	0.999803489356147	ENSMUSG00000064612
Snora41	59.0876342120351	-0.123382301657467	0.243876740922911	-0.505920741726116	0.612912290786532	0.999803489356147	ENSMUSG00000064602
Gm11605	328.715033016628	0.211950745053922	0.182896957370472	1.15885331336923	0.246515981818583	0.999803489356147	ENSMUSG00000081643
Adam23	1.23522203937146	-0.836396462534562	1.39408085897153	-0.599962661528545	0.548531119973531	0.999803489356147	ENSMUSG00000025964
Fastkd2	846.26759602179	-0.117778099814898	0.0875573059114293	-1.34515445157757	0.178575361911013	0.999803489356147	ENSMUSG00000025962
Klf7	416.735970827984	0.174244469100159	0.152181371729573	1.1449789624041	0.25221787214596	0.999803489356147	ENSMUSG00000025959
Gm13748	1.13884781124599	0.486700874753132	1.17731941274545	0.413397476915947	0.679315422885175	0.999803489356147	ENSMUSG00000086836
ENSMUSG00000101895	0.783988566825719	1.27730667310092	1.24675788914712	1.02450257922547	0.30559795321276	0.999803489356147	ENSMUSG00000101895
Creb1	3969.35645789589	0.0554592615748428	0.0692534766192151	0.800815558759329	0.42323843036636	0.999803489356147	ENSMUSG00000025958
Mettl21a	231.52315804766	-0.121949519114502	0.138978682960615	-0.877469238567049	0.380231820047176	0.999803489356147	ENSMUSG00000025956
2810408I11Rik	166.17285974858	0.210863900920838	0.436722453179304	0.482832745112522	0.629214498454757	0.999803489356147	ENSMUSG00000087213
Ccnyl1	195.27279623569	-0.0450462586612107	0.161669393781933	-0.278631951338738	0.78052728975896	0.999803489356147	ENSMUSG00000070871
Fzd5	141.825621325073	-0.115378591835042	0.177939786058781	-0.648413681900956	0.516717423436571	0.999803489356147	ENSMUSG00000045005
ENSMUSG00000102140	1.62867461000911	0.0069302757039877	1.09726330923667	0.00631596413153454	0.994960623237521	0.999803489356147	ENSMUSG00000102140
Plekhm3	375.823757797938	0.0396684771564481	0.278125551949746	0.142627949421978	0.886584022701014	0.999803489356147	ENSMUSG00000051344
Rpl10a-ps1	12252.4142406803	0.145434395140251	0.384916443019686	0.377833677354264	0.705554154069648	0.999803489356147	ENSMUSG00000084416
ENSMUSG00000100774	0.966916208898228	-1.48479824849867	1.24166999019898	-1.19580746914945	0.231771700508736	0.999803489356147	ENSMUSG00000100774
Idh1	425.944627828876	-0.0429838629708271	0.2084984851237	-0.20615911403541	0.83666662405713	0.999803489356147	ENSMUSG00000025950
Pikfyve	1252.32315967678	-0.0635343318054083	0.142194200735779	-0.446813804477624	0.655009503264635	0.999803489356147	ENSMUSG00000025949
Map2	40.0536460251531	-0.103409616865998	0.279816840094189	-0.369561806327272	0.711709013490255	0.999803489356147	ENSMUSG00000015222
ENSMUSG00000055567	2.02620066741011	-0.163770902498784	1.67926066092766	-0.0975255993958163	0.922309005748122	0.999803489356147	ENSMUSG00000055567
Rpe	2146.30795224731	-0.107116416723726	0.155718611987686	-0.687884481863975	0.491525529550606	0.999803489356147	ENSMUSG00000026005
Kansl1l	72.0405840242269	0.177625469394824	0.195379324555305	0.909131351534303	0.363280795259003	0.999803489356147	ENSMUSG00000026004
Gm37570	4.88576799173337	1.1017235327745	0.855959634281565	1.28712089758673	0.198052152659096	0.999803489356147	ENSMUSG00000102559
Gm38387	1.99361350605284	-0.810613802615123	0.876657633723821	-0.924664055193177	0.355140682263948	0.999803489356147	ENSMUSG00000102374
Gm38162	5.68590260986755	1.32463769442964	0.738118410289364	1.79461408354568	0.0727152077003104	0.999803489356147	ENSMUSG00000102776
Gm15789	2.94557917534804	-0.23680443886616	0.734377289204472	-0.322456103078409	0.747107187821893	0.999803489356147	ENSMUSG00000082057
6820402A03Rik	5.07017742625835	0.75536143331252	0.532395466088755	1.41879764465649	0.155958019577053	0.999803489356147	ENSMUSG00000103706
Gm37285	3.71457299107246	-0.834437546303949	0.646894965645815	-1.28991194957114	0.197081231340356	0.999803489356147	ENSMUSG00000103756
ENSMUSG00000103382	1.5320955767102	0.256509735346363	1.34820586366351	0.190260065068508	0.849105345474024	0.999803489356147	ENSMUSG00000103382
ENSMUSG00000103553	1.54204317921503	-0.972297485465758	0.911713134024379	-1.06645111184694	0.286219767227331	0.999803489356147	ENSMUSG00000103553
Acadl	3498.99707511036	-0.126775282454532	0.111385784734828	-1.13816392959246	0.255052037342947	0.999803489356147	ENSMUSG00000026003
Gm15793	107.921979269426	0.445120215121804	0.213273279243595	2.08708853120507	0.0368801325837883	0.999803489356147	ENSMUSG00000082769
Rpl31-ps14	23.4233024118917	0.273764273307363	0.357570860560198	0.765622436007405	0.443900990753946	0.999803489356147	ENSMUSG00000094191
Lancl1	274.359184901228	-0.0257804710521741	0.129410863611155	-0.199214117986552	0.84209525620284	0.999803489356147	ENSMUSG00000026000
Ikzf2	2.3275838949821	-0.367152415114564	1.07006137027139	-0.343113418832649	0.731513136465029	0.999803489356147	ENSMUSG00000025997
Bard1	302.724483767458	0.0524093610666516	0.165935811818018	0.315841170705989	0.752123066709231	0.999803489356147	ENSMUSG00000026196
Atic	8114.53749762099	-0.14253976943188	0.181879256164346	-0.783705478227164	0.433212947318244	0.999803489356147	ENSMUSG00000026192
Fn1	4.32785692811896	0.0172860951647265	0.565598590896155	0.0305624791910068	0.975618465429606	0.999803489356147	ENSMUSG00000026193
Gm5829	1.59684836332274	-0.316876754612981	0.91838415227176	-0.345037263359935	0.730066356847288	0.999803489356147	ENSMUSG00000101834
Gm5256	6.18726743681792	-0.196479734013795	0.553189919296341	-0.355175911852693	0.722457809376475	0.999803489356147	ENSMUSG00000100319
Mreg	1108.12013254576	-0.0288454255526544	0.226667545908112	-0.127258736741906	0.898735618021675	0.999803489356147	ENSMUSG00000039395
Gm25360	1.848968716471	0.593689164184219	1.41977377897258	0.41815757762046	0.67583191006828	0.999803489356147	ENSMUSG00000094655
Gm23472	9.89628979873494	3.17854556926393	1.02966376829219	3.08697427951251	0.00202205091823955	0.999803489356147	ENSMUSG00000094050
Gm24497	10.2651742335127	2.0133972533676	1.17801949862268	1.70913745971236	0.087425490167519	0.999803489356147	ENSMUSG00000093956
Gm25939	2.43761086068522	1.2784279000547	1.88720260127875	0.677419530467189	0.498139810168157	0.999803489356147	ENSMUSG00000093843
Pecr	384.954658820319	-0.169736128005402	0.100277621399478	-1.69266208787722	0.0905198055693495	0.999803489356147	ENSMUSG00000026189
Tmem169	2.23613407045354	-0.336699590208593	0.839432553111742	-0.40110380394525	0.68834370032806	0.999803489356147	ENSMUSG00000026188
Xrcc5	1001.85506117678	-0.220261540522631	0.0975661944338389	-2.25756002681845	0.0239731031491801	0.999803489356147	ENSMUSG00000026187
Gm15843	4.13650117166403	-0.23124995180089	0.875820557241919	-0.26403804967667	0.791750599386406	0.999803489356147	ENSMUSG00000085812
Smarcal1	799.678824262432	0.176438247953001	0.16847860653989	1.04724422629425	0.294986952312318	0.999803489356147	ENSMUSG00000039354
Rpl37a	5334.0016115782	0.34882655718984	0.499956684065067	0.697713558609893	0.485356347129225	0.999803489356147	ENSMUSG00000046330
ENSMUSG00000026185	0.891839674369538	-0.950765431463669	2.5347265189298	-0.37509586314862	0.707589173535858	0.999803489356147	ENSMUSG00000026185
Tns1	83.8007198870597	0.051505841135739	0.165239595295986	0.311703989854726	0.755265495466181	0.999803489356147	ENSMUSG00000055322
Rufy4	0.927616462522398	-0.641388295215897	1.14300814864548	-0.561140614768121	0.574701682560253	0.999803489356147	ENSMUSG00000061815
ENSMUSG00000094768	1.01343474437512	-0.757864105215897	2.59445799338567	-0.292108836276402	0.770203410814595	0.999803489356147	ENSMUSG00000094768
Arpc2	21754.8940490528	-0.0783210739398245	0.0778951873272782	-1.00546743164962	0.314671824216496	0.999803489356147	ENSMUSG00000006304
Aamp	4722.48710949818	0.0305529822986471	0.115400004763457	0.264757201364711	0.791196508969168	0.999803489356147	ENSMUSG00000006299
Pnkd	245.25212679281	0.235266111444968	0.234430013952712	1.00356651214645	0.315587602669993	0.999803489356147	ENSMUSG00000026179
Gm37503	1.98057997124605	0.419753701292247	1.03244816955723	0.406561524025232	0.684330061239467	0.999803489356147	ENSMUSG00000103013
Tmbim1	119.261382571059	0.223723067945247	0.197904090954676	1.13046206809582	0.25828157316529	0.999803489356147	ENSMUSG00000006301
Catip	1.19691143562203	1.62930218757085	1.28369459663525	1.2692288273562	0.204359462301161	0.999803489356147	ENSMUSG00000073650
Slc11a1	2.50006515993747	0.596938345302309	0.98640259922155	0.605167044139382	0.545068010739795	0.999803489356147	ENSMUSG00000026177
Ctdsp1	1386.5599154818	0.0740524891531113	0.0936426165111764	0.790799017712977	0.429061283236498	0.999803489356147	ENSMUSG00000026176
Usp37	905.154055537584	0.0351771749711657	0.138497357859689	0.2539916682512	0.799501994858015	0.999803489356147	ENSMUSG00000033364
Gm37733	1.65358708777317	-0.228131108848132	1.07156071555534	-0.212896110818978	0.831407995965672	0.999803489356147	ENSMUSG00000103227
Cnot9	1430.5410805348	-0.0122800603898329	0.105698584116701	-0.11617998947152	0.907509895436163	0.999803489356147	ENSMUSG00000026174
Plcd4	6.30500971523015	-0.858897065856863	0.603774814997356	-1.42254536711775	0.154867991133084	0.999803489356147	ENSMUSG00000026173
Zfp142	366.205988611668	0.25545592469463	0.46064282338202	0.5545639956335	0.579192921571675	0.999803489356147	ENSMUSG00000026135
Bcs1l	342.287455530937	-0.108730214616489	0.163536359164564	-0.66486874950589	0.506134445263528	0.999803489356147	ENSMUSG00000026172
Rnf25	470.3442405954	-0.0313475405614363	0.111141976247496	-0.282049515582034	0.777905542932415	0.999803489356147	ENSMUSG00000026171
ENSMUSG00000033276	2.58665911972665	0.486323023908247	0.764986542241332	0.635727554740206	0.524954013355728	0.999803489356147	ENSMUSG00000033276
Ttll4	816.555450128616	-0.0312471047513352	0.135484745895749	-0.230631902837082	0.81760078079842	0.999803489356147	ENSMUSG00000033257
Cyp27a1	1.83681344009979	0.559351464003622	0.875706888643994	0.638742793116269	0.522990269111954	0.999803489356147	ENSMUSG00000026170
Wnt10a	5.35719463647091	-0.551321013627691	0.591767795611093	-0.931650924089856	0.351516956481196	0.999803489356147	ENSMUSG00000026167
Nhej1	47.5904898910366	-0.134243140319941	0.218677633930084	-0.613886010687592	0.539290655086223	0.999803489356147	ENSMUSG00000026162
Cnppd1	1166.99441419884	-0.0141119649870909	0.113477093204118	-0.124359591778642	0.901030566016496	0.999803489356147	ENSMUSG00000033159
Retreg2	1069.4057203125	-0.00955245269507345	0.0821548280354975	-0.116273783580267	0.907435562335706	0.999803489356147	ENSMUSG00000049339
Zfand2b	874.687467337226	0.200177807377227	0.272191623584307	0.735429712131552	0.462077832087324	0.999803489356147	ENSMUSG00000026197
Abcb6	27.9445529572788	-0.0814198095184919	0.229146130630051	-0.355318282244711	0.722351160655429	0.999803489356147	ENSMUSG00000026198
Atg9a	73.7244149797031	0.489071217367392	0.565837838618413	0.864331057395421	0.387406053790505	0.999803489356147	ENSMUSG00000033124
Ankzf1	638.691917081607	0.224480718321445	0.148494906896793	1.51170651581649	0.130608540296402	0.999803489356147	ENSMUSG00000026199
Glb1l	37.4469608117194	-0.00782249377235325	0.321052210292327	-0.0243651765089256	0.980561325194516	0.999803489356147	ENSMUSG00000026200
Stk16	476.865573037832	-0.15644789015067	0.112674619039637	-1.38849273673279	0.164987054954007	0.999803489356147	ENSMUSG00000026201
Tuba4a	4984.40009641462	0.0631035514265004	0.293979038640616	0.214653234183963	0.830037686311214	0.999803489356147	ENSMUSG00000026202
Dnajb2	414.002721929772	0.221285345877023	0.210817588896374	1.04965314818108	0.293877611868443	0.999803489356147	ENSMUSG00000026203
ENSMUSG00000026204	0.98630690780908	1.17325435438971	1.28603239523247	0.912305443268107	0.361607949707613	0.999803489356147	ENSMUSG00000026204
Dnpep	646.164324590414	-0.0962364982475325	0.0902986274952357	-1.06575815067189	0.286532983237501	0.999803489356147	ENSMUSG00000026209
Gmppa	417.508066131261	0.0958172669353124	0.137779149662688	0.695440980510425	0.486778985996197	0.999803489356147	ENSMUSG00000033021
Chpf	202.430733393913	0.0853050184942556	0.132550119013004	0.643568026414876	0.519855589311157	0.999803489356147	ENSMUSG00000032997
Obsl1	2.35503968029686	0.961632572196611	0.757910211917777	1.26879484809071	0.204514243095767	0.999803489356147	ENSMUSG00000026211
Tmem198	5.21172729378631	-0.104102130142084	0.577041647338793	-0.180406614708285	0.856833361739597	0.999803489356147	ENSMUSG00000051703
Stk11ip	573.712743791489	-0.0163478379250245	0.237350372214477	-0.0688763947260721	0.945088008167696	0.999803489356147	ENSMUSG00000026213
Slc4a3	1.68936708631702	-0.30385868765939	0.960437109731587	-0.31637541342432	0.751717576521668	0.999803489356147	ENSMUSG00000006576
ENSMUSG00000026235	1.24346518974077	-1.61210487627459	2.49091646301753	-0.647193472848009	0.517506735177598	0.999803489356147	ENSMUSG00000026235
ENSMUSG00000004872	3.16312022514409	-0.502040970857899	1.19491086536507	-0.420149306035907	0.674376385273273	0.999803489356147	ENSMUSG00000004872
Sgpp2	14.1734567562695	0.144434749650011	0.355372403556173	0.406432092657359	0.684425143230417	0.999803489356147	ENSMUSG00000032908
ENSMUSG00000102945	1.07758235731019	-2.89037770196039	2.50137468886637	-1.15551569096204	0.247879310839279	0.999803489356147	ENSMUSG00000102945
Farsb	2766.11845178939	-0.136032264617431	0.0919403228701537	-1.47957131725052	0.138987685788248	0.999803489356147	ENSMUSG00000026245
4833412K13Rik	4.72356567400579	1.05961991826453	0.696674292165082	1.52096888055322	0.128267646849274	0.999803489356147	ENSMUSG00000104018
ENSMUSG00000012187	0.970721135273399	-0.384021925045507	1.54276010721921	-0.248918754930537	0.803423627483545	0.999803489356147	ENSMUSG00000012187
Acsl3	2854.87963820148	0.00810272681372462	0.0896764795167979	0.0903550948630498	0.928005039780301	0.999803489356147	ENSMUSG00000032883
Utp14b	895.042228908968	0.194078749433268	0.159346284654234	1.21796846317691	0.223235957335584	0.999803489356147	ENSMUSG00000079470
Gm6159	283.220535626104	-0.0289374348726577	0.2159811989825	-0.133981267855645	0.893417386957032	0.999803489356147	ENSMUSG00000099377
Gm5830	14.3814964416199	0.538130740863821	0.569013836360248	0.945725229294996	0.344288750842225	0.999803489356147	ENSMUSG00000072978
Ap1s3	1162.22054087008	-0.00283130081372563	0.103631207831742	-0.027320928443897	0.978203764613579	0.999803489356147	ENSMUSG00000054702
Gm37886	1.78408042655829	-1.54369813585474	1.81995215758484	-0.848208085812156	0.396322094927661	0.999803489356147	ENSMUSG00000102235
Wdfy1	1937.01553147742	-0.344731187674408	0.272562819191292	-1.26477701066214	0.205951274647435	0.999803489356147	ENSMUSG00000073643
Gm10555	1.01926130086861	-0.838172261291431	1.33827151436104	-0.626309573428842	0.531111908221345	0.999803489356147	ENSMUSG00000104497
Mrpl44	836.146562477474	-0.138876390330894	0.098739259731485	-1.40649616685966	0.159576842037271	0.999803489356147	ENSMUSG00000026248
Serpine2	23.4161962951662	0.00253230792656519	0.282223823088171	0.00897269372534173	0.992840922269842	0.999803489356147	ENSMUSG00000026249
Gm5529	202.112203899855	0.178627635179747	0.143148702352591	1.2478466953879	0.212087204526984	0.999803489356147	ENSMUSG00000067106
Fam124b	0.943161650139606	-0.140064547669602	1.17244384869048	-0.119463757540323	0.904907951660197	0.999803489356147	ENSMUSG00000043230
Cul3	5392.77016773267	-0.0390543590037103	0.199817316460359	-0.195450322802519	0.845040424267522	0.999803489356147	ENSMUSG00000004364
Gm37902	6.04180117291392	0.898649573095659	0.521628905919892	1.72277564164297	0.0849291053079791	0.999803489356147	ENSMUSG00000103076
1700016L21Rik	2.63183230018805	-1.29126789335911	0.745030457334055	-1.73317463822843	0.0830646333649441	0.999803489356147	ENSMUSG00000101483
Dock10	12691.8511021844	0.0110159193673406	0.174215321110259	0.0632316336883413	0.949582055131982	0.999803489356147	ENSMUSG00000038608
ENSMUSG00000103192	6.04132956273093	1.63180888032111	1.3906390445203	1.17342374842064	0.240625918350298	0.999803489356147	ENSMUSG00000103192
ENSMUSG00000104488	2.61017141213835	1.61260078302908	1.40476737601583	1.1479486287635	0.250989771537375	0.999803489356147	ENSMUSG00000104488
ENSMUSG00000102721	13.7100078165115	0.832031200621673	0.957419904784201	0.869034784491147	0.384828105184381	0.999803489356147	ENSMUSG00000102721
Gm5530	20.7836610006216	0.69818360499855	0.312098906600876	2.23705879845139	0.0252824973445818	0.999803489356147	ENSMUSG00000087008
ENSMUSG00000055980	1.02893241029903	0.431862126882772	1.41011987939363	0.306259157957887	0.759407333283196	0.999803489356147	ENSMUSG00000055980
Rhbdd1	213.235598850412	0.120715913026477	0.252972877115221	0.477189153252565	0.63322743423321	0.999803489356147	ENSMUSG00000026142
Gm19552	1.24370212015626	-0.315323707178053	1.49275646982127	-0.211235867037178	0.832703224292719	0.999803489356147	ENSMUSG00000104493
Col4a4	4.12058578312929	-0.00173281525293733	0.578913285471049	-0.00299322074035213	0.997611758950388	0.999803489356147	ENSMUSG00000067158
Col4a3	1.80214844601634	-0.909144264946178	0.821379927434006	-1.10684986883761	0.268358843190699	0.999803489356147	ENSMUSG00000079465
C430014B12Rik	1.23064546965066	-0.576361961101045	1.57191367434418	-0.366662604001781	0.713870704274067	0.999803489356147	ENSMUSG00000097564
Mff	1608.73016938923	-0.0851164141522678	0.0760356432911889	-1.11942781658732	0.262957669480354	0.999803489356147	ENSMUSG00000026150
Gm28941	1.84631811631091	0.443792166825818	1.33121967636854	0.333372601610312	0.738853042179285	0.999803489356147	ENSMUSG00000101450
ENSMUSG00000026149	0.889533953337596	0.572903056586447	1.29990456719977	0.44072701261492	0.659410638321337	0.999803489356147	ENSMUSG00000026149
Agfg1	3197.32205699791	-0.0120921655044953	0.105931428058593	-0.114150877847194	0.909118191082157	0.999803489356147	ENSMUSG00000026159
ENSMUSG00000113880	2.60600620453415	-0.793697429849633	0.865989956583944	-0.916520363562319	0.359394031858643	0.999803489356147	ENSMUSG00000113880
ENSMUSG00000101896	1.45592973401848	1.56086534757692	1.14132261657794	1.36759346122214	0.171439364335224	0.999803489356147	ENSMUSG00000101896
Gm6374	3.36723219246999	0.615527443010964	0.632516588339522	0.973140395616884	0.330483529587234	0.999803489356147	ENSMUSG00000079140
Pid1	1.75689463937376	-0.241704753038105	1.41112332306174	-0.171285350534548	0.863999398818927	0.999803489356147	ENSMUSG00000045658
ENSMUSG00000036766	0.891839674369538	-0.950765431463669	2.5347265189298	-0.37509586314862	0.707589173535858	0.999803489356147	ENSMUSG00000036766
ENSMUSG00000104396	1.41604925084035	-0.899589272244325	2.05573283918037	-0.437600283022669	0.661676066003791	0.999803489356147	ENSMUSG00000104396
Trip12	4560.78709679047	0.148500440052967	0.224524067118344	0.661400989029359	0.508355191826562	0.999803489356147	ENSMUSG00000026219
ENSMUSG00000103505	1.64137078457378	0.0752168294928835	1.29460460613499	0.058100233180416	0.953668788657454	0.999803489356147	ENSMUSG00000103505
Gm37738	4.13473177249106	0.495758669574587	0.843267735672937	0.587901859163348	0.55659816848652	0.999803489356147	ENSMUSG00000104503
Fbxo36	19.6793028884873	-0.33084481191946	0.30657663949126	-1.07915858321257	0.280517039213627	0.999803489356147	ENSMUSG00000073633
Slc16a14	0.827654442852804	0.320445283118546	1.34403866371669	0.238419691166036	0.811555596371723	0.999803489356147	ENSMUSG00000026220
ENSMUSG00000118590	135.874622024171	0.0597501778221973	0.349043599582923	0.17118256256122	0.864080218173059	0.999803489356147	ENSMUSG00000118590
Gm29284	8.50868014670325	0.0327602383691838	0.397452679467958	0.0824255063849051	0.934308353894478	0.999803489356147	ENSMUSG00000099693
C130026I21Rik	1619.41231929369	0.145265160174383	0.172577829659034	0.841737090224086	0.399935132261631	0.999803489356147	ENSMUSG00000052477
Rpl19-ps1	246.375491918713	0.232923142465883	0.339268365238504	0.686545420473079	0.492369232609157	0.999803489356147	ENSMUSG00000064281
ENSMUSG00000118640	38.3660761257053	0.234479961469162	0.339719445245758	0.690216485251633	0.490058057884306	0.999803489356147	ENSMUSG00000118640
Gm7582	55.2998457983475	0.0709747590418961	0.382374683282559	0.185615738031089	0.85274611087956	0.999803489356147	ENSMUSG00000061852
Gm2389	10.206210512029	0.637434261967456	0.396751430933768	1.60663380713519	0.108134721838564	0.999803489356147	ENSMUSG00000089976
Gm18342	62.043398106445	0.109032706763379	0.267535911056415	0.407544192227663	0.683608343495137	0.999803489356147	ENSMUSG00000101279
A530032D15Rik	1568.49448639639	0.10727204388078	0.240842911828734	0.445402536725108	0.656028879337263	0.999803489356147	ENSMUSG00000089844
Gm10553	128.855346308131	-0.143902534603792	0.175721989740839	-0.81892160916243	0.412831140137932	0.999803489356147	ENSMUSG00000073631
A530040E14Rik	1764.57588578075	0.0571962824539683	0.151653039899182	0.377152231778487	0.706060476942217	0.999803489356147	ENSMUSG00000072109
Gm16038	2.95298875366478	-0.383643744506727	0.679237475797116	-0.564815338047276	0.572199373339807	0.999803489356147	ENSMUSG00000090128
Gm7592	39.4850040077339	0.373091802548912	0.301740256429728	1.23646677762999	0.216285107463669	0.999803489356147	ENSMUSG00000090186
Gm6264	270.663038440298	0.086027597613534	0.16262077443505	0.529007427940229	0.5968002971114	0.999803489356147	ENSMUSG00000089716
ENSMUSG00000118618	2.66720619745199	2.5316822569186	1.02734188611035	2.46430354991548	0.0137279794596736	0.999803489356147	ENSMUSG00000118618
Gm7609	67.5266212658631	0.144378203656993	0.338448779327248	0.426588046628446	0.669679405633234	0.999803489356147	ENSMUSG00000079457
Gm16028	4.01258235195625	-0.137019432889139	0.683442738241929	-0.200484144789663	0.841101956902128	0.999803489356147	ENSMUSG00000090252
Gm16026	145.648819325348	0.0951758872829163	0.179704919252215	0.529623160450813	0.596373233092648	0.999803489356147	ENSMUSG00000079455
Gm2619	41.2557747347774	0.0696356264872905	0.319797206037908	0.217749327300364	0.827624428070905	0.999803489356147	ENSMUSG00000091199
Gm16025	3.04650271002721	0.748481689108648	0.717897615241482	1.04260227812134	0.297132533726687	0.999803489356147	ENSMUSG00000089652
Gm7281	2.0281069127889	0.368244345934661	1.10637628761629	0.332838248664973	0.739256384483531	0.999803489356147	ENSMUSG00000089937
ENSMUSG00000118591	54.201539549311	0.344696427847592	0.290088092794659	1.18824742004005	0.234735946276373	0.999803489356147	ENSMUSG00000118591
Gm2427	240.635461686157	0.0758843166713374	0.107063920394951	0.708775807866979	0.478463612724964	0.999803489356147	ENSMUSG00000101751
Gm16092	8.51485874356078	0.334578869323713	0.452005577793199	0.740209603069962	0.459172821542878	0.999803489356147	ENSMUSG00000089714
ENSMUSG00000118607	305.325067025571	-0.0759578048129463	0.221320051852662	-0.343203447573351	0.731445411237172	0.999803489356147	ENSMUSG00000118607
ENSMUSG00000118632	2.24260014144376	0.699013270287339	0.887979858204316	0.78719496149484	0.431167746276715	0.999803489356147	ENSMUSG00000118632
ENSMUSG00000094127	2.21586894664562	2.16500175940863	1.69556277145951	1.27686323140077	0.20165053713644	0.999803489356147	ENSMUSG00000094127
Sp110	10225.6720768947	-0.105152428875794	0.0756149642693114	-1.39062988248307	0.164337689952821	0.999803489356147	ENSMUSG00000070034
Gm16094	384.664567559027	-0.00866010099371848	0.162846692491208	-0.0531794712022538	0.957588912073976	0.999803489356147	ENSMUSG00000090103
Sp140	8595.40290072235	-0.0086393480912039	0.15199895770939	-0.0568382061390291	0.95467407901916	0.999803489356147	ENSMUSG00000070031
Gm10552	177.779694320974	0.160986900203611	0.141525371519401	1.13751264861751	0.255324039996165	0.999803489356147	ENSMUSG00000073628
Gm17017	36.1478280701716	-0.277911319049536	0.320503134472375	-0.86710951987114	0.385882005008242	0.999803489356147	ENSMUSG00000090246
Sp100	7665.80786984355	-0.00378550808957897	0.0655300930304345	-0.0577674762009089	0.953933845130544	0.999803489356147	ENSMUSG00000026222
A630001G21Rik	2967.77764417396	-0.107827500722238	0.0737822950771054	-1.46142784809763	0.143898062923119	0.999803489356147	ENSMUSG00000052760
Cab39	7370.33639402708	-0.0407499393018505	0.200240690957682	-0.203504787698033	0.83874050393699	0.999803489356147	ENSMUSG00000036707
Itm2c	439.079888320664	0.211556609336569	0.127883623539848	1.65429007624771	0.098068588347445	0.999803489356147	ENSMUSG00000026223
Gm28884	0.94320024094819	-0.0590552906954925	1.14370251881555	-0.0516351846078401	0.958819383460168	0.999803489356147	ENSMUSG00000099767
Gpr55	185.480602700388	0.096997496400548	0.151579036773618	0.639913661315929	0.522228731832732	0.999803489356147	ENSMUSG00000049608
Gm28100	2.05981021525806	0.160476292541991	0.839193328910074	0.191226844892123	0.848347872501897	0.999803489356147	ENSMUSG00000100108
Gm18180	126.586561735879	0.173892045555525	0.236559264610563	0.735088713780863	0.46228546739879	0.999803489356147	ENSMUSG00000099342
Gm37914	2.93818316196107	-0.195838407499376	0.741246468444914	-0.264201471219461	0.791624677465824	0.999803489356147	ENSMUSG00000103272
Armc9	189.432836961056	0.333362878286396	0.18779949350212	1.77509998599987	0.0758813793116426	0.999803489356147	ENSMUSG00000062590
Gm16341	48.5401739751098	0.268094047657312	0.250662053099549	1.06954381144736	0.284824698360525	0.999803489356147	ENSMUSG00000087538
B3gnt7	534.250682838876	0.127728952879688	0.18231086961414	0.700610737856854	0.483545975391776	0.999803489356147	ENSMUSG00000079445
Ncl	334374.712294363	0.112898334105476	0.13930906901405	0.810416255772188	0.417700978152923	0.999803489356147	ENSMUSG00000026234
C130036L24Rik	44.2355726016179	0.0644633000274997	0.339513716343003	0.189869501361688	0.849411392089331	0.999803489356147	ENSMUSG00000073627
Ptma	204812.833872812	-0.0988032236363604	0.128639075277582	-0.768065406433923	0.442448327742023	0.999803489356147	ENSMUSG00000026238
Pde6d	261.000786019841	0.0318960946408177	0.106199990674896	0.300339900579271	0.763917900966629	0.999803489356147	ENSMUSG00000026239
Cops7b	526.596578872014	0.067063258690075	0.115354266589792	0.581367821691044	0.560992579794406	0.999803489356147	ENSMUSG00000026240
Dis3l2	578.233908475079	0.0711841053956092	0.117636437647463	0.605119526051411	0.545099581137103	0.999803489356147	ENSMUSG00000053333
Gm37485	10.366364715841	-0.0110791640893694	0.588881715209627	-0.0188139040544424	0.984989561955002	0.999803489356147	ENSMUSG00000104121
Gm38142	1.24443381508486	-1.1769118297507	1.59465715963089	-0.738034393564019	0.460493549250289	0.999803489356147	ENSMUSG00000102383
ENSMUSG00000102293	1.3469744322812	-1.69500520975803	1.62075761093113	-1.0458104273743	0.295648565926227	0.999803489356147	ENSMUSG00000102293
Gm38021	5.70216553846347	1.12533631456069	1.06788990801099	1.05379431542405	0.291977096663307	0.999803489356147	ENSMUSG00000102649
Gm6136	58913.1089415528	0.0193575456551101	0.199609460269344	0.0969770953189787	0.922744583987827	0.999803489356147	ENSMUSG00000084106
ENSMUSG00000099401	1.61940436672588	-0.545559543209015	1.9001662983571	-0.28711147212784	0.774026968331925	0.999803489356147	ENSMUSG00000099401
ENSMUSG00000102956	2.74236937891892	1.47581592579881	1.52999409095654	0.964589297777053	0.334750561964586	0.999803489356147	ENSMUSG00000102956
Gm29371	2.34762860322742	1.61829480084867	0.922698254788285	1.75387218134491	0.0794524112768865	0.999803489356147	ENSMUSG00000101625
Chrng	1.01300425111357	-0.350051085082184	1.13258055145625	-0.309073897333038	0.757265314640569	0.999803489356147	ENSMUSG00000026253
Eif4e2	4456.81992924029	0.0819587253796848	0.169834630423975	0.482579584476283	0.629394277799728	0.999803489356147	ENSMUSG00000026254
Gigyf2	2819.72839602808	0.400190242883426	0.249588895105227	1.60339762998953	0.108846893959824	0.999803489356147	ENSMUSG00000048000
Gm6153	69.6219830916527	0.507312869438923	0.310111773672727	1.63590328554991	0.101859830265084	0.999803489356147	ENSMUSG00000090994
Inpp5d	2781.19370754295	0.0426321410078556	0.22335363312051	0.19087283431317	0.848625223936341	0.999803489356147	ENSMUSG00000026288
Atg16l1	617.73632013409	0.0322106237608846	0.15895926365772	0.202634455015105	0.839420757431169	0.999803489356147	ENSMUSG00000026289
Sag	7.22598823853727	0.667447732552399	0.663964613715383	1.00524594046891	0.314778438808371	0.999803489356147	ENSMUSG00000056055
Dgkd	2176.82983925832	0.117995692604809	0.108900943154752	1.0835139640355	0.278580356119882	0.999803489356147	ENSMUSG00000070738
Gm19582	2.20956618678199	0.0943927743085269	0.739112323659436	0.127711000462253	0.898377684274723	0.999803489356147	ENSMUSG00000101942
Usp40	346.30176369827	0.181086343565744	0.105264936172765	1.72029120189213	0.0853795219168568	0.999803489356147	ENSMUSG00000005501
Ugt1a7c	1.10112298460053	1.59901496285367	1.70775026689555	0.936328334329853	0.349104163942397	0.999803489356147	ENSMUSG00000090124
Dnajb3	13.3477575968817	0.0850565726875645	0.355376463770193	0.239342166290919	0.810840271378413	0.999803489356147	ENSMUSG00000081984
Mroh2a	139.455152591378	0.045492459436375	0.142705522191403	0.318785557403719	0.749889130869411	0.999803489356147	ENSMUSG00000079429
Hjurp	4008.54605357192	0.18685626991935	0.199710834115936	0.935634116929658	0.349461602466114	0.999803489356147	ENSMUSG00000044783
Glrp1	9.265095699658	0.948533162179846	0.64082398392012	1.48017737472523	0.138825916778828	0.999803489356147	ENSMUSG00000062310
Arl4c	114.798334921634	0.273341340191215	0.19486081122061	1.40275173073027	0.160690885367004	0.999803489356147	ENSMUSG00000049866
Sh3bp4	13.1782560873396	0.781579809488926	0.356024052365684	2.19530058234981	0.0281420431679976	0.999803489356147	ENSMUSG00000036206
Gm38312	1.86551071472816	0.868846188841451	0.876002069600318	0.991831205647571	0.321279872372013	0.999803489356147	ENSMUSG00000102700
Gm5259	2.02722196018237	1.83044286651978	1.25269691253054	1.46120170666195	0.143960094827257	0.999803489356147	ENSMUSG00000102083
Agap1	4.32073012374569	-1.21871369703702	0.832568564654211	-1.46379979833035	0.143248657574915	0.999803489356147	ENSMUSG00000055013
Ackr3	299.383310564604	-0.129288422558979	0.206115821523921	-0.627261030245436	0.530488143643365	0.999803489356147	ENSMUSG00000044337
ENSMUSG00000101028	1.4594069102731	1.15032853668726	1.76073608394946	0.653322520719285	0.513548376643001	0.999803489356147	ENSMUSG00000101028
Cops8	1282.70361427464	-0.0512456347173557	0.149101529082582	-0.343696238614512	0.731074740201239	0.999803489356147	ENSMUSG00000034432
ENSMUSG00000026304	5.97966812510022	-0.142294706497244	0.547709026871343	-0.259799819824165	0.795018189943178	0.999803489356147	ENSMUSG00000026304
Lrrfip1	4407.42285271881	-0.0513348634057337	0.21620544988722	-0.23743556618259	0.812318900643865	0.999803489356147	ENSMUSG00000026305
Rbm44	32.7621269730345	0.741274953132818	0.344900062861617	2.14924563069807	0.0316149338669712	0.999803489356147	ENSMUSG00000070732
Gm7776	1.60106040369066	-1.04456685181816	1.16346695051758	-0.897805349222401	0.369289332353304	0.999803489356147	ENSMUSG00000100018
Ube2f	956.503270181268	-0.027065137523359	0.149067207261298	-0.181563323152066	0.855925434251847	0.999803489356147	ENSMUSG00000034343
Gm7785	12.7308989981476	-0.250326723988636	0.362413309633878	-0.690721663179325	0.489740472861817	0.999803489356147	ENSMUSG00000083064
Scly	404.376406009199	-0.0253401613301304	0.137924001534573	-0.183725537601796	0.854228773815458	0.999803489356147	ENSMUSG00000026307
Gm17090	2.24003590503795	-1.03141651394577	0.799195772741258	-1.29056802991837	0.196853507810304	0.999803489356147	ENSMUSG00000090322
Erfe	6.42901508522626	0.435548398190139	0.466696318993211	0.933258696211134	0.350686415418741	0.999803489356147	ENSMUSG00000047443
Ilkap	4199.70994855583	-0.0674680464287515	0.14354194540269	-0.47002321335048	0.638338432862236	0.999803489356147	ENSMUSG00000026309
1700020N18Rik	2.31512240558264	1.23076277711996	0.966331530035694	1.2736444365781	0.202789456354042	0.999803489356147	ENSMUSG00000100253
Hes6	375.992976279376	0.0482432603727444	0.246248408306157	0.195912983578615	0.844678274769471	0.999803489356147	ENSMUSG00000067071
Per2	200.201262396824	0.101281407090657	0.275389135893957	0.367775608728648	0.713040557712928	0.999803489356147	ENSMUSG00000055866
ENSMUSG00000101958	1.31468828580051	-2.14036211934538	2.55488704612807	-0.837752151348176	0.402169917005128	0.999803489356147	ENSMUSG00000101958
Traf3ip1	599.527029757597	0.0448269978908339	0.141570181475253	0.316641523120954	0.751515624842532	0.999803489356147	ENSMUSG00000034292
Asb1	178.675446154195	-0.0478670107086917	0.112328586497233	-0.42613382934246	0.670010330877801	0.999803489356147	ENSMUSG00000026311
Hdac4	323.915950747674	0.0907330791968129	0.150793652119225	0.60170357254213	0.54737147152609	0.999803489356147	ENSMUSG00000026313
Ndufa10	3925.04159484944	0.0204639009484742	0.147115903161826	0.139100535758967	0.889370704868254	0.999803489356147	ENSMUSG00000026260
Cops9	306.477818633577	0.246111678324642	0.477520792632474	0.515394684633267	0.606277246045276	0.999803489356147	ENSMUSG00000073616
ENSMUSG00000044055	1.56818324706938	0.911702967521504	0.889853844385526	1.02455360874579	0.305573863520673	0.999803489356147	ENSMUSG00000044055
Ankmy1	2.55975346479805	0.204655089166802	0.836852178440264	0.244553452138035	0.806802209516045	0.999803489356147	ENSMUSG00000034212
Dusp28	59.3019718460394	-0.0403682395709295	0.212110475142963	-0.190317048432998	0.849060695079018	0.999803489356147	ENSMUSG00000047067
5033417F24Rik	1.9113339655312	1.04263006314033	1.04854118056694	0.994362531928961	0.320046402372129	0.999803489356147	ENSMUSG00000097251
Rnpepl1	518.622242938379	0.152108480845646	0.188620742412747	0.806424992818637	0.419997840914307	0.999803489356147	ENSMUSG00000026269
9430060I03Rik	3.73989134709402	-0.0480645295588972	0.778961761065612	-0.0617033235279039	0.950799093222477	0.999803489356147	ENSMUSG00000100632
Capn10	216.038073561125	-0.132854741606591	0.129288268935947	-1.02758543137747	0.304144880088519	0.999803489356147	ENSMUSG00000026270
Sned1	9.75555405845805	0.406205881291	0.466448996815446	0.870847368231599	0.383837497613169	0.999803489356147	ENSMUSG00000047793
Mterf4	514.013513676516	0.0669693346626932	0.21481465985046	0.311754024186771	0.75522746716802	0.999803489356147	ENSMUSG00000026273
Gm28535	3.09771530371838	0.521029398457822	0.635014587534211	0.820499888799407	0.411931192615912	0.999803489356147	ENSMUSG00000101172
Gm7867	13.9471039895958	-0.0377319279648953	0.542475642130006	-0.0695550639227646	0.944547804064734	0.999803489356147	ENSMUSG00000100351
Pask	432.242093733129	0.0872894142660994	0.142369716772552	0.61311784728456	0.539798420114835	0.999803489356147	ENSMUSG00000026274
Ppp1r7	2660.6195987777	-0.0958062395850699	0.0600114574045824	-1.59646580384089	0.110384834658288	0.999803489356147	ENSMUSG00000026275
Hdlbp	9248.08066004647	0.207280986455947	0.325701052588353	0.63641484977921	0.524506064525132	0.999803489356147	ENSMUSG00000034088
Gm17415	1.50168042330349	0.217614500870471	0.952646926951673	0.228431431114573	0.819310856808492	0.999803489356147	ENSMUSG00000090489
Septin2	64.5569947616648	-0.0536531830081765	0.177832007796708	-0.301707120517422	0.762875339706698	0.999803489356147	ENSMUSG00000026276
Farp2	13.7278146404423	0.12512601975722	0.571290262635521	0.219023547119426	0.826631705114413	0.999803489356147	ENSMUSG00000034066
ENSMUSG00000103854	1.66573761392987	-0.144738540027564	1.90818032435093	-0.0758516048931576	0.939537159577293	0.999803489356147	ENSMUSG00000103854
Stk25	556.725371094892	-0.0515207776783132	0.121573644200553	-0.423782457267813	0.671724473053066	0.999803489356147	ENSMUSG00000026277
ENSMUSG00000026278	1.40629792120033	-0.120118386440419	1.08140264365216	-0.111076468275266	0.911555708848281	0.999803489356147	ENSMUSG00000026278
Thap4	340.646606280256	-0.0308071103504158	0.122311795830211	-0.251873583748056	0.801138778561327	0.999803489356147	ENSMUSG00000026279
Gm10550	1.49285375187339	-0.83388202906318	1.04225861364244	-0.8000720916558	0.423669029683856	0.999803489356147	ENSMUSG00000101952
Atg4b	534.222840723928	0.0791856523600379	0.101780862427132	0.778001389177947	0.436568194255631	0.999803489356147	ENSMUSG00000026280
Dtymk	1537.60363722264	-0.0795612124361689	0.177235853319274	-0.448900213732978	0.653503641883361	0.999803489356147	ENSMUSG00000026281
Ing5	924.008793857138	0.0599845168484965	0.100520170663336	0.596741096365598	0.550680250171354	0.999803489356147	ENSMUSG00000026283
D2hgdh	245.626100844901	0.030453721340105	0.21338719219796	0.142715788264616	0.886514647128961	0.999803489356147	ENSMUSG00000073609
Gm18666	44.3513999447183	0.0834698809251113	0.509264754059968	0.163902724976884	0.869807721891372	0.999803489356147	ENSMUSG00000101660
Gm7889	9.60920882196084	0.592664856681133	0.723391213532201	0.819286778155968	0.4126228143697	0.999803489356147	ENSMUSG00000099624
Pdcd1	34.6968245951048	-0.29539191672034	0.186482489030455	-1.58401959484839	0.113189260064955	0.999803489356147	ENSMUSG00000026285
Gm7895	115.345567427984	0.117300894301547	0.240901744022117	0.486924222062822	0.626312032922506	0.999803489356147	ENSMUSG00000100347
Fam174a	662.821165341664	-0.0672882311884719	0.147133153884708	-0.457328816870183	0.647434720032881	0.999803489356147	ENSMUSG00000051185
BC055308	12.8036665550258	1.44931737102683	0.749852352601302	1.93280365927909	0.0532603894004119	0.999803489356147	ENSMUSG00000103973
Gm15427	3414.36265706489	0.295254389683958	0.242344968525272	1.21832275487564	0.223101346237115	0.999803489356147	ENSMUSG00000081051
St8sia4	2442.24494280571	0.0712919122825526	0.122059203774196	0.584076497946354	0.559168845997061	0.999803489356147	ENSMUSG00000040710
Gm37642	4.3091242121505	3.48960308600212	1.52523846034059	2.28790656460557	0.0221429629401187	0.999803489356147	ENSMUSG00000103197
Gm22360	4.23187418439067	0.315922473272013	0.712813581901668	0.443204901384152	0.657617533986886	0.999803489356147	ENSMUSG00000095955
Gm28901	14.8971460937144	-0.0445029007164236	0.484545330204684	-0.0918446591934431	0.926821461082751	0.999803489356147	ENSMUSG00000100454
Gm6430	6152.22577052066	-0.0365242237485779	0.283663443233576	-0.128759008676711	0.89754834179211	0.999803489356147	ENSMUSG00000044757
ENSMUSG00000101348	1.24481259745306	-0.463242036530963	0.996668032333744	-0.464790704128696	0.642081345397084	0.999803489356147	ENSMUSG00000101348
D1Ertd622e	1502.75696084941	-0.140710725969183	0.13679023177088	-1.02866062983846	0.303639176499359	0.999803489356147	ENSMUSG00000044768
Ppip5k2	2621.94241607989	-0.0366467729149655	0.0872928296260752	-0.41981423986305	0.674621161477738	0.999803489356147	ENSMUSG00000040648
Gin1	366.034869902687	-0.0116804722821976	0.141130591495674	-0.0827635749160429	0.934039532729763	0.999803489356147	ENSMUSG00000026333
Pam	25.5962004085991	-0.186975558815946	0.327740317115313	-0.570499108750665	0.568339226430656	0.999803489356147	ENSMUSG00000026335
Gm3531	4643.98126807586	0.0465384113273112	0.311319898610393	0.14948742928107	0.881169027896856	0.999803489356147	ENSMUSG00000089782
ENSMUSG00000089706	2.87642645823013	0.0285627317679835	0.66145129319987	0.0431819123518635	0.965556523490602	0.999803489356147	ENSMUSG00000089706
1810006J02Rik	2.80249723444167	-0.0368696567835398	0.699706426989251	-0.0526930371958785	0.957976486832981	0.999803489356147	ENSMUSG00000100182
Gm29462	3.45473800065945	-0.192501928205303	0.682231304697976	-0.282165193651621	0.777816845810815	0.999803489356147	ENSMUSG00000099634
Gm3555	8.85814377201725	0.15336181623014	0.851303016226144	0.180149504121339	0.857035199628917	0.999803489356147	ENSMUSG00000089791
Gm7967	40.4680730110377	-0.220815475389725	0.327589040766772	-0.674062462141203	0.500271603395354	0.999803489356147	ENSMUSG00000100009
Prdx2-ps1	14.8385528253987	-0.207910902439636	0.401917941091049	-0.517296893677449	0.604948922153879	0.999803489356147	ENSMUSG00000082431
ENSMUSG00000104104	2.23212588425968	-1.49516173996045	2.21939153793123	-0.673680923084955	0.500514192803536	0.999803489356147	ENSMUSG00000104104
Gm29668	2.7076706191497	0.16143555446942	0.742269924133811	0.217489014737875	0.827827267092073	0.999803489356147	ENSMUSG00000099835
Gm29667	15.7299937954564	0.976567448749522	0.52297175505647	1.86734262282305	0.0618537568256277	0.999803489356147	ENSMUSG00000100794
ENSMUSG00000100349	3.42244959942692	-0.119986500282498	0.729697230554998	-0.164433268016158	0.869390075903463	0.999803489356147	ENSMUSG00000100349
Gm28187	20.892406526161	0.449652426289092	0.25758491536552	1.74564735536249	0.080872248131981	0.999803489356147	ENSMUSG00000099375
ENSMUSG00000099989	1.45192020506605	-0.314597587390662	0.989621365511758	-0.317896923363185	0.750563126442613	0.999803489356147	ENSMUSG00000099989
ENSMUSG00000047496	0.983019168160219	1.19130977649952	1.70727153087011	0.697785768085975	0.485311180765887	0.999803489356147	ENSMUSG00000047496
Capza1-ps1	1683.27860182004	-0.0854168942284309	0.209832775527695	-0.407071269079016	0.683955644462357	0.999803489356147	ENSMUSG00000067017
Pign	515.498547425334	0.144373394952296	0.203106823075474	0.710824938159008	0.477192724899854	0.999803489356147	ENSMUSG00000056536
Relch	702.994731302665	-0.063268582013875	0.0676517565483142	-0.935209745347722	0.349680217204619	0.999803489356147	ENSMUSG00000026319
Gm37566	5.0253573242623	0.0722585680819999	1.18098171316579	0.0611851710119208	0.951211739423528	0.999803489356147	ENSMUSG00000104044
Gm10193	9.03268392717813	-0.422450707710733	0.43685039754945	-0.967037480291895	0.333525297392439	0.999803489356147	ENSMUSG00000101330
Gm7160	56.5465355965106	-0.0142233115360058	0.15506726847302	-0.0917234931398853	0.926917731245725	0.999803489356147	ENSMUSG00000099843
Zcchc2	2013.0443558493	-0.00852705175191771	0.0633326526300374	-0.134639106334755	0.892897220720989	0.999803489356147	ENSMUSG00000038866
ENSMUSG00000102501	2.16089518266153	0.424544135312668	1.91348555580931	0.221869527064764	0.824415453201705	0.999803489356147	ENSMUSG00000102501
ENSMUSG00000101583	2.03272338143834	-0.350363444677581	0.907289424607969	-0.386165026478701	0.69937445344553	0.999803489356147	ENSMUSG00000101583
Phlpp1	1087.39087976807	0.114645685356477	0.215955965977789	0.530875286715944	0.595505204306253	0.999803489356147	ENSMUSG00000044340
Gm6651	3.17492412524263	0.391311233981551	0.824745215827671	0.474463175380595	0.635169651719253	0.999803489356147	ENSMUSG00000099604
Bcl2	1626.20069560796	0.254270942994443	0.118013032856287	2.15460052877454	0.0311931076318323	0.999803489356147	ENSMUSG00000057329
D630008O14Rik	2.16496586283646	1.47442186885901	1.15949777042168	1.27160388443248	0.203513895915852	0.999803489356147	ENSMUSG00000054006
Kdsr	303.515113883181	-0.154878568182768	0.122379420857288	-1.26556055828519	0.205670454483481	0.999803489356147	ENSMUSG00000009905
Vps4b	2245.44145379868	-0.136785216388159	0.186589467524994	-0.733081122973013	0.463508952756562	0.999803489356147	ENSMUSG00000009907
Serpinb7	1.05653917867369	0.331738910126135	1.15911095445773	0.286201168965169	0.774724048471787	0.999803489356147	ENSMUSG00000067001
Serpinb8	1.33792406686914	-1.02054563251766	1.77709241142551	-0.574278313247101	0.565779482143191	0.999803489356147	ENSMUSG00000026315
Gm8173	5.60571927008977	0.0442494947278727	0.690688965507983	0.0640657328227741	0.948917887017053	0.999803489356147	ENSMUSG00000100555
Dsel	53.5416610549891	0.1190247934982	0.239621680503321	0.49671963425092	0.619386774671286	0.999803489356147	ENSMUSG00000038702
Gm6028	1.12790973486701	0.302930593933601	1.77195227048077	0.170958664621033	0.864256267881903	0.999803489356147	ENSMUSG00000101875
Gm29106	6.53090681937033	-0.560736629447892	0.468588277705329	-1.19665099646498	0.231442614626662	0.999803489356147	ENSMUSG00000102030
Tsn	3856.1764028936	-0.023830433608194	0.172438812295577	-0.138196461057423	0.890085151929307	0.999803489356147	ENSMUSG00000026374
Nifk	5579.02122235431	-0.152554520282642	0.102373544615343	-1.49017522892119	0.136178167805664	0.999803489356147	ENSMUSG00000026377
Clasp1	1997.69714676613	0.135012677265745	0.226123563510409	0.597074781459164	0.550457454113288	0.999803489356147	ENSMUSG00000064302
2900060B14Rik	3.61573373668706	0.945119712694302	0.84177375716463	1.12277165289374	0.261534487491361	0.999803489356147	ENSMUSG00000107722
Tfcp2l1	3.45009364129797	0.408218335236957	0.753653285261552	0.541652697891826	0.588057781423859	0.999803489356147	ENSMUSG00000026380
Ralb	751.065968026424	0.0301640034512915	0.266516905287122	0.113178574615353	0.909888981493204	0.999803489356147	ENSMUSG00000004451
Gm27184	1.19917212995992	-0.36982885553292	1.73611744895037	-0.213020643134779	0.831310861306131	0.999803489356147	ENSMUSG00000098447
Tmem185b	193.62783881269	-0.125982645253741	0.114230103933623	-1.10288479932529	0.270077196176043	0.999803489356147	ENSMUSG00000098923
Epb41l5	75.2736317853433	0.01386243722033	0.295945082476563	0.0468412487354908	0.962639753360146	0.999803489356147	ENSMUSG00000026383
Ptpn4	649.153292907861	-0.0659995515359544	0.174048573250391	-0.379201910727563	0.704537932790893	0.999803489356147	ENSMUSG00000026384
Gm3851	50.3103329542209	0.130652970892192	0.182724732127397	0.715026200181267	0.474592853937929	0.999803489356147	ENSMUSG00000091876
Tmem177	176.004982073265	0.0143368188166025	0.229640424923699	0.0624315985365646	0.950219132038864	0.999803489356147	ENSMUSG00000036975
Dbi	4662.78473163957	0.186374713789871	0.403245640380319	0.462186556100379	0.643947543272962	0.999803489356147	ENSMUSG00000026385
3110009E18Rik	58.191505211476	0.0507286766858446	0.319598347117456	0.158726342433809	0.873884483019914	0.999803489356147	ENSMUSG00000026388
Steap3	39.0484959228745	-0.0561184272808354	0.22082984874257	-0.254125190051888	0.799398843173564	0.999803489356147	ENSMUSG00000026389
Marco	2.96609605295391	-0.769584709815957	0.956980321760799	-0.80418028700941	0.42129286186425	0.999803489356147	ENSMUSG00000026390
Insig2	318.244367431903	-0.0790121458370612	0.155881851648827	-0.506871999538861	0.612244633432077	0.999803489356147	ENSMUSG00000003721
Gm37174	14.4219202590738	-0.202925684280232	0.369313371597369	-0.549467470951647	0.582684682184118	0.999803489356147	ENSMUSG00000104253
Ccdc93	627.615580414234	0.0864243977874398	0.185466704251393	0.465983358772014	0.641227412214077	0.999803489356147	ENSMUSG00000026339
Ddx18	5948.78760125367	0.0801255362797834	0.24010618288404	0.333708758838918	0.738599339521338	0.999803489356147	ENSMUSG00000001674
ENSMUSG00000099960	0.892024033888542	-1.44353680495208	2.51296987345101	-0.574434584434433	0.565673755295471	0.999803489356147	ENSMUSG00000099960
Gm28911	149.861048383143	0.19623612525258	0.372966023550687	0.526150139319355	0.598783894096865	0.999803489356147	ENSMUSG00000100405
ENSMUSG00000036815	0.76505413834746	0.944444784603284	2.50690459351917	0.376737426324423	0.706368746492673	0.999803489356147	ENSMUSG00000036815
ENSMUSG00000102521	2.51874702803049	-0.395146586986307	1.63608236890597	-0.241519983648829	0.809152130125112	0.999803489356147	ENSMUSG00000102521
Actr3	36868.4262852774	-0.13476034570949	0.164140475350988	-0.821006186446863	0.411642744392411	0.999803489356147	ENSMUSG00000026341
Slc35f5	113.519634273401	0.0053462841257863	0.131944327538096	0.0405192419071043	0.967679166814398	0.999803489356147	ENSMUSG00000026342
ENSMUSG00000049690	2.82249459307488	-1.14960957633112	1.57982106791524	-0.72768340648107	0.466807410296114	0.999803489356147	ENSMUSG00000049690
Mgat5	391.068941833033	0.034235491454119	0.177254370548252	0.193143285258512	0.846846754087589	0.999803489356147	ENSMUSG00000036155
Gm8451	751.067961530692	0.475409515919323	0.343478535055506	1.38410254906467	0.166327056523825	0.999803489356147	ENSMUSG00000099471
Tmem163	22.665998485542	-0.318496625889628	0.260200016397867	-1.2240453720903	0.220935111935911	0.999803489356147	ENSMUSG00000026347
Ccnt2	1210.69805097067	0.0144737254109159	0.0689684490445364	0.209860097065101	0.833776866606769	0.999803489356147	ENSMUSG00000026349
Map3k19	13.9118919876181	0.183719795600305	0.410150546486534	0.44793258761716	0.654201848974313	0.999803489356147	ENSMUSG00000051590
Rab3gap1	1928.06649881963	0.108658374023919	0.255314284418428	0.425586740167824	0.670409004048489	0.999803489356147	ENSMUSG00000036104
Zranb3	194.72836587032	0.100994069211644	0.158082421835782	0.6388696987231	0.522907701665356	0.999803489356147	ENSMUSG00000036086
ENSMUSG00000099760	6.23974212824286	1.01751620260738	0.683449497909538	1.48879501077937	0.1365413565378	0.999803489356147	ENSMUSG00000099760
Gm38248	4.88637337971367	0.509903517285875	0.641610596163357	0.794724277209492	0.426773907127256	0.999803489356147	ENSMUSG00000104164
Rpl28-ps1	2340.15961792228	0.0733344392927638	0.278732612350989	0.263099601708675	0.792473810924442	0.999803489356147	ENSMUSG00000058603
Gm37625	1.18000932510012	-1.44614243625828	1.8138838739242	-0.797262965423279	0.425298324191004	0.999803489356147	ENSMUSG00000102782
R3hdm1	1585.97125241572	0.173023380709788	0.269047860471942	0.643095174242544	0.520162345627784	0.999803489356147	ENSMUSG00000056211
ENSMUSG00000102179	3.49617811628106	-0.717934597185678	1.48844834189505	-0.482337597468532	0.62956614284309	0.999803489356147	ENSMUSG00000102179
Ubxn4	6087.29169038875	0.224480740017218	0.13398055227205	1.67547256829786	0.0938415488863369	0.999803489356147	ENSMUSG00000026353
Lct	7.3665669783108	0.0802937327723057	0.750622811402705	0.106969481279498	0.914813191215427	0.999803489356147	ENSMUSG00000026354
Mcm6	10802.5240126723	-0.084339842462439	0.103298949647599	-0.816463698325701	0.414234977783292	0.999803489356147	ENSMUSG00000026355
Dars	7702.74274583098	-0.0626136271206178	0.152250403251117	-0.411254261293121	0.680886104235074	0.999803489356147	ENSMUSG00000026356
Gm6170	1169.06015720518	0.302958719311763	0.225421973751526	1.34396267706228	0.178960456308853	0.999803489356147	ENSMUSG00000100078
Cxcr4	505.496245599191	-0.194519437297798	0.354903701050795	-0.548090754539519	0.583629588575855	0.999803489356147	ENSMUSG00000045382
Gm15790	31.0917862846232	-0.106762453078358	0.33127965856132	-0.322272890348912	0.747245968821146	0.999803489356147	ENSMUSG00000089648
Rpl31-ps9	684.18568271079	0.452146714758904	0.250586259806326	1.80435557443716	0.0711755827515897	0.999803489356147	ENSMUSG00000094122
Cd55b	17.1877104198531	-0.166879743997055	0.391640651068353	-0.426104245158988	0.670031886998659	0.999803489356147	ENSMUSG00000026401
Cd55os	8.65379824698858	0.716806051080474	0.471665977920757	1.51973236280549	0.128578254382603	0.999803489356147	ENSMUSG00000087691
Gm15675	31.1898712737048	-0.12211709039445	0.220638136804854	-0.553472269857216	0.579940063803741	0.999803489356147	ENSMUSG00000086825
Cd55	476.226063311417	0.0892224045081348	0.167359477563492	0.533118325935774	0.593951674032825	0.999803489356147	ENSMUSG00000026399
Gm16083	1.16093935065815	-1.78813338387762	1.38183302130987	-1.29402999950212	0.195655058737889	0.999803489356147	ENSMUSG00000085526
Gm37109	1.85976926719534	-1.40843609691763	2.19601607033037	-0.641359649388057	0.52128904272161	0.999803489356147	ENSMUSG00000102139
ENSMUSG00000103751	1.21663804956716	0.978334869164491	1.59682745621127	0.6126741279147	0.54009183283208	0.999803489356147	ENSMUSG00000103751
ENSMUSG00000026405	5.63678369346265	0.453780823937423	0.663391523183556	0.684031688797846	0.49395515577758	0.999803489356147	ENSMUSG00000026405
Pfkfb2	36.7930642807625	0.31480787932097	0.217107763915644	1.45000746930122	0.147056436332777	0.999803489356147	ENSMUSG00000026409
Yod1	445.945086162997	-0.0396508090134246	0.206644967528187	-0.191878899775366	0.847837065866654	0.999803489356147	ENSMUSG00000046404
ENSMUSG00000104515	6.72266508527063	0.883335784232648	1.03086671768951	0.85688651022945	0.391507608705762	0.999803489356147	ENSMUSG00000104515
AA986860	15.2702090107965	0.0352621174580547	0.280944399790697	0.125512797138241	0.90011759450237	0.999803489356147	ENSMUSG00000042510
Fcamr	5.51224268287781	0.888350981265869	0.499071034264318	1.78000909745321	0.0750744718603614	0.999803489356147	ENSMUSG00000026415
Gm15848	20.9331641748802	-0.0638402905544471	0.367552117330063	-0.173690444278188	0.86210874773694	0.999803489356147	ENSMUSG00000086706
Pigr	40.0039516373644	0.536633618761963	0.602295224914697	0.890981028179274	0.372939348263001	0.999803489356147	ENSMUSG00000026417
Fcmr	491.200055667718	-0.12419625097156	0.136987871770456	-0.906622238643652	0.364606597477794	0.999803489356147	ENSMUSG00000042474
ENSMUSG00000016524	0.893166140069957	-1.96133670155238	2.0926686902301	-0.937241862846778	0.348634160473563	0.999803489356147	ENSMUSG00000016524
Il10	255.081644617998	-0.12791904585271	0.242024711113649	-0.528537128560575	0.597126584335668	0.999803489356147	ENSMUSG00000016529
Mapkapk2	3155.19595611198	-0.0190171652493367	0.174356946626411	-0.109070304437507	0.913146727967772	0.999803489356147	ENSMUSG00000016528
Dyrk3	98.7583115951838	-0.0717238643049104	0.193146312463399	-0.371344725095397	0.710380789770167	0.999803489356147	ENSMUSG00000016526
Eif2d	908.930166707241	-0.0179917462740085	0.105705790512195	-0.170205872231122	0.864848233732522	0.999803489356147	ENSMUSG00000026427
Rassf5	1423.19397676284	-0.12876167436659	0.18696708113093	-0.688686337657592	0.491020675684246	0.999803489356147	ENSMUSG00000026430
Ikbke	379.964432994537	0.106690569991661	0.171916279714939	0.620596084143796	0.534865416791398	0.999803489356147	ENSMUSG00000042349
Gm28913	2.50386813587346	0.457617091571326	0.972365303101153	0.470622604603284	0.637910262406284	0.999803489356147	ENSMUSG00000102055
Srgap2	637.268710070206	0.22829494473135	0.20313083005867	1.12388131661458	0.26106337836436	0.999803489356147	ENSMUSG00000026425
Fam72a	429.346097922785	-0.165050693512543	0.169368687196819	-0.97450536013627	0.329805679021745	0.999803489356147	ENSMUSG00000055184
ENSMUSG00000026432	2.36185283076278	0.868897649539909	0.913433126367992	0.951243856235908	0.341480600170331	0.999803489356147	ENSMUSG00000026432
Gm8532	2.68254833899907	0.787690312166598	0.903613768685966	0.871711276945299	0.383365906691381	0.999803489356147	ENSMUSG00000095841
Ctse	33.9452575125867	0.0223194177840159	0.361870537827552	0.0616779081215286	0.950819333232136	0.999803489356147	ENSMUSG00000004552
Slc26a9	0.880939648549993	0.541221316209787	2.06250931502535	0.26240914999365	0.793006019110889	0.999803489356147	ENSMUSG00000042268
Pm20d1	2.39851475408453	-0.579939839256707	1.2197681620752	-0.475450874426869	0.63446564030431	0.999803489356147	ENSMUSG00000042251
Slc41a1	215.939336689217	0.279485546823555	0.275295320930249	1.01522083949392	0.310000568899464	0.999803489356147	ENSMUSG00000013275
Rab29	310.294687707296	-0.0980627891329377	0.117996571229446	-0.83106473443413	0.405937060590487	0.999803489356147	ENSMUSG00000026433
Nucks1	12860.9707843582	0.204803371329859	0.311759473343395	0.656927499695491	0.511227535021827	0.999803489356147	ENSMUSG00000026434
Gm38067	14.1372085660256	0.240005544579089	0.366911323323519	0.654124114799987	0.513031846374531	0.999803489356147	ENSMUSG00000103569
Elk4	1319.77848730081	0.0236844866283429	0.318757850885925	0.0743024416889388	0.940769734217508	0.999803489356147	ENSMUSG00000026436
Mfsd4a	139.83071193573	0.323348725065654	0.360954722486108	0.895815194876966	0.370351473137591	0.999803489356147	ENSMUSG00000059149
Gm37120	24.286889876254	0.602235408681371	0.42743572436166	1.40894963700276	0.158850060672845	0.999803489356147	ENSMUSG00000103966
Cdk18	4.32098891933167	0.0474084038291731	0.650225074986019	0.0729107591401216	0.941877132177422	0.999803489356147	ENSMUSG00000026437
Gm7241	1.08849704331264	0.387220359800637	1.57863212215638	0.245288534526779	0.806233028754709	0.999803489356147	ENSMUSG00000089808
Nuak2	261.559403212945	-0.163345609300345	0.114250181426771	-1.42971859878438	0.15279780003454	0.999803489356147	ENSMUSG00000009772
F730311O21Rik	22.1579937585761	0.189894474589885	0.402118082079333	0.472235602059846	0.636758630384614	0.999803489356147	ENSMUSG00000100658
Tmcc2	2.85580822838624	-0.0634510894366798	0.650730658742431	-0.0975074534820629	0.922323415415236	0.999803489356147	ENSMUSG00000042066
Dstyk	52.6959757633912	0.294500325003377	0.218648120186191	1.34691450698315	0.178007768741965	0.999803489356147	ENSMUSG00000042046
6030442K20Rik	12.509405117385	0.159239106393162	0.311753314608583	0.510785608143707	0.609501187790453	0.999803489356147	ENSMUSG00000097760
Rbbp5	1422.60705713875	0.154097765783257	0.255170185734129	0.60390192271058	0.54590885042847	0.999803489356147	ENSMUSG00000026439
Tmem81	144.130969800416	-0.133184338462314	0.170969013791396	-0.778996939321507	0.435981517703656	0.999803489356147	ENSMUSG00000048174
ENSMUSG00000026442	1.27573635360697	-2.31133614264685	2.06187925959136	-1.12098520410207	0.262294160501271	0.999803489356147	ENSMUSG00000026442
Mdm4	2596.3035949244	0.12588608839507	0.124364316896823	1.01223639976658	0.311425036077546	0.999803489356147	ENSMUSG00000054387
Gm29257	91.4027573084126	0.570765538131524	0.456312889807392	1.25082054634144	0.210999956958402	0.999803489356147	ENSMUSG00000100228
Pik3c2b	650.247842920621	-0.188754171375068	0.26442420528713	-0.713830911092673	0.475331743071827	0.999803489356147	ENSMUSG00000026447
Gm26616	9.03741883031143	0.0131390207332314	0.373227554735564	0.0352037800171013	0.971917248083314	0.999803489356147	ENSMUSG00000102425
Ppp1r15b	5796.08245494741	-0.0290229333145852	0.0668053509072846	-0.434440249477388	0.663968775071167	0.999803489356147	ENSMUSG00000046062
Plekha6	44.1623115486909	-0.027310033591566	0.269218220680869	-0.101441995725614	0.919199600625603	0.999803489356147	ENSMUSG00000041757
Ren1	1.90926968787285	-0.122170476981131	0.926821637976003	-0.131816599845389	0.895129356347151	0.999803489356147	ENSMUSG00000070645
Etnk2	5.04351189619915	0.121959068688214	0.557769394566176	0.218655003082541	0.826918803089862	0.999803489356147	ENSMUSG00000070644
Sox13	4.14317816453875	0.276277893864288	0.631344423309295	0.437602493447447	0.661674463374056	0.999803489356147	ENSMUSG00000070643
Snrpe	5027.09558629481	0.0557744296700315	0.382457768186803	0.145831603668172	0.884054326480471	0.999803489356147	ENSMUSG00000090553
Zc3h11a	208.114041321004	0.36687464931554	0.433233067452484	0.846829747952649	0.397090024533901	0.999803489356147	ENSMUSG00000102976
Gm38394	262.885763001933	0.625049368725188	0.537541709771348	1.16279231427653	0.244913776212481	0.999803489356147	ENSMUSG00000094410
Lax1	672.696369958607	0.0085794582384438	0.113857836812145	0.075352373439161	0.939934351910753	0.999803489356147	ENSMUSG00000051998
Atp2b4	7.91416192730343	0.180295697234678	0.388290949284411	0.464331444157913	0.642410298955026	0.999803489356147	ENSMUSG00000026463
Btg2	1436.45626581349	0.214260135522274	0.149464746886528	1.43351619686573	0.151710373557722	0.999803489356147	ENSMUSG00000020423
Gm38140	0.909924797496501	0.106489832816815	1.50155349129833	0.0709197730443403	0.943461606384613	0.999803489356147	ENSMUSG00000102380
Gm8618	1.91448430984156	0.72602377283296	1.07911908819041	0.672793003829116	0.501078989273254	0.999803489356147	ENSMUSG00000073559
ENSMUSG00000096676	1.47680329478664	-0.90823221824266	1.79977799996578	-0.504635692990984	0.613814735546398	0.999803489356147	ENSMUSG00000096676
Ppfia4	3.3946946788363	0.821260516129242	0.663148599244264	1.23842607383197	0.215558117617143	0.999803489356147	ENSMUSG00000026458
Tmem183a	2571.01124258314	-0.0883305214776029	0.0733042230937147	-1.20498543944294	0.228208922961676	0.999803489356147	ENSMUSG00000042305
Cyb5r1	241.360014548764	-0.302843499716406	0.290826923361367	-1.04131865171268	0.297727683046029	0.999803489356147	ENSMUSG00000026456
Adipor1	3276.59708738593	-0.211235276004914	0.284466522089237	-0.742566381637871	0.457744248407808	0.999803489356147	ENSMUSG00000026457
Klhl12	741.436512708205	-0.00635935525845135	0.190879244020746	-0.033316117166517	0.973422501254176	0.999803489356147	ENSMUSG00000026455
Rabif	318.334905573068	-0.00657689885524751	0.142805850752184	-0.0460548277301371	0.963266550025757	0.999803489356147	ENSMUSG00000042229
ENSMUSG00000077202	2.98127537885475	-0.865351731617444	0.694544098440299	-1.24592770071867	0.212790939346414	0.999803489356147	ENSMUSG00000077202
Gm15454	103.63865783551	-0.0172931321395712	0.2189147395198	-0.0789948277466588	0.937036737068877	0.999803489356147	ENSMUSG00000096712
Kdm5b	422.303285001384	0.549078851431386	0.276682044852059	1.98451204784531	0.0471987863551657	0.999803489356147	ENSMUSG00000042207
Ppp1r12b	126.20462003157	0.233151014316792	0.330094333988004	0.706316317217565	0.479991448307041	0.999803489356147	ENSMUSG00000073557
Gm37677	2.2278979040482	0.741086657263155	0.941053946001899	0.787507092884194	0.430985077957563	0.999803489356147	ENSMUSG00000103976
Ube2t	173.276158144189	-0.0236801947739088	0.145553872730771	-0.162690241967726	0.870762330408401	0.999803489356147	ENSMUSG00000026429
Lgr6	1.01502381083378	-0.44492454266781	1.53264265865208	-0.290298942259059	0.771587547978965	0.999803489356147	ENSMUSG00000042793
Ptprv	26.1588054060753	0.102729230534304	0.260138444788776	0.394902147653403	0.692915104948863	0.999803489356147	ENSMUSG00000097993
Arl8a	544.200667040111	0.0228333662557193	0.161469392418998	0.141409872878377	0.887546155216528	0.999803489356147	ENSMUSG00000026426
Gm26280	1.41570282723091	0.609163200245197	1.09695607865289	0.555321413591397	0.578674834586493	0.999803489356147	ENSMUSG00000087721
Gm15445	7.06843477789959	1.43477068577408	0.750036987513291	1.91293324150719	0.0557565993593695	0.999803489356147	ENSMUSG00000085311
Gm4204	7779.98879579744	-0.0929909719107633	0.274604192245353	-0.338636388433858	0.73488366655426	0.999803489356147	ENSMUSG00000079139
Gm26642	14.7100307986643	-0.557331271842051	0.424525134581674	-1.31283456842018	0.189238698900011	0.999803489356147	ENSMUSG00000097680
Rnpep	761.411041391328	0.0297080226844803	0.117328246902674	0.253204351626626	0.800110303953652	0.999803489356147	ENSMUSG00000041926
Timm17a	1571.79282549126	-0.188515294344472	0.229574569352602	-0.821150595538886	0.411560493521874	0.999803489356147	ENSMUSG00000062580
Ipo9	2775.29699260372	-0.00574846743155257	0.118366840759113	-0.0485648463259338	0.961266085459139	0.999803489356147	ENSMUSG00000041879
Nav1	1.47342977391876	-0.24145153424335	1.12649037824378	-0.214339632993384	0.830282213466765	0.999803489356147	ENSMUSG00000009418
ENSMUSG00000102474	1.27836261619428	-1.73425954411601	2.46381067913819	-0.703893184164067	0.48149929638832	0.999803489356147	ENSMUSG00000102474
Csrp1	1965.51755087626	0.046457749988565	0.136432803789171	0.340517446671813	0.733466886419108	0.999803489356147	ENSMUSG00000026421
Phlda3	60.2086057739551	0.184191284814616	0.231348739438761	0.796162906534322	0.425937354490644	0.999803489356147	ENSMUSG00000041801
ENSMUSG00000026418	4.1800446381276	0.14545115493295	0.646680290427924	0.224919727856097	0.822041721864555	0.999803489356147	ENSMUSG00000026418
Lad1	1838.63483150239	0.119756291122566	0.240289886340733	0.498382570095983	0.618214419570065	0.999803489356147	ENSMUSG00000041782
ENSMUSG00000026414	41.6510884606086	0.160151684389443	0.297800258037839	0.537782221696711	0.590727407147274	0.999803489356147	ENSMUSG00000026414
Tmem9	188.046784454425	0.0576536483466058	0.133012953612985	0.43344386227491	0.664692341023603	0.999803489356147	ENSMUSG00000026411
Gm37759	7.24755832597786	-0.0663731598757325	0.446803645192363	-0.148551070677046	0.881907884433428	0.999803489356147	ENSMUSG00000102717
Gm15850	1.71770991377425	-0.823942055035506	1.09160612532612	-0.754797940318768	0.450370229915476	0.999803489356147	ENSMUSG00000086264
Kif21b	980.339798198481	0.581903032090772	0.371504424207615	1.56634213261906	0.117268542356147	0.999803489356147	ENSMUSG00000041642
Inava	0.838238356932583	-2.52076278854108	1.38400774383684	-1.8213502054207	0.0685536392658334	0.999803489356147	ENSMUSG00000041605
Camsap2	550.788611463263	0.0227943075752448	0.193364204478134	0.117882767582365	0.906160547512152	0.999803489356147	ENSMUSG00000041570
9230116N13Rik	33.4086491428928	0.0629571081040376	0.228582975823178	0.275423433776357	0.782990942473613	0.999803489356147	ENSMUSG00000097403
Ddx59	217.253394495446	0.0965350776311817	0.151591050870744	0.636812510215354	0.524246976305443	0.999803489356147	ENSMUSG00000026404
Kif14	826.971844928731	0.263290933792986	0.311551345340364	0.845096443109067	0.398056994089525	0.999803489356147	ENSMUSG00000041498
Gm29485	0.965307219622963	0.704055471846513	1.7316811653043	0.406573384265452	0.684321348800699	0.999803489356147	ENSMUSG00000101413
Zfp281	1138.92467199833	0.324431926304802	0.170971224377962	1.8975820491733	0.0577511609480865	0.999803489356147	ENSMUSG00000041483
Gm19705	2.66634182199477	0.416269292904804	0.704195811706735	0.591127192159672	0.554435201517053	0.999803489356147	ENSMUSG00000097113
ENSMUSG00000097448	1.17999286654442	-1.92641050795804	1.72410099634335	-1.11734203045168	0.263848110956972	0.999803489356147	ENSMUSG00000097448
ENSMUSG00000092912	0.813623045672104	0.320414000117949	2.53486578929264	0.1264027474241	0.899413127468028	0.999803489356147	ENSMUSG00000092912
Gm8762	12.5343670866416	0.755441246049114	0.515480017191201	1.46551024453952	0.142781759407229	0.999803489356147	ENSMUSG00000104360
Gm29718	4.28457684868238	-0.092305521794044	0.589117892452967	-0.156684295243016	0.875493664775873	0.999803489356147	ENSMUSG00000103953
ENSMUSG00000103728	1.80397732713295	-0.364217475899911	1.81475315201579	-0.200698081441736	0.840934659981582	0.999803489356147	ENSMUSG00000103728
Gm4258	1.96228850372024	0.198691951946887	0.924865022201422	0.214833459128931	0.829897165295091	0.999803489356147	ENSMUSG00000098243
Ptprc	10196.3050369762	-0.0258831832874513	0.230143491573522	-0.112465414991684	0.910454390568733	0.999803489356147	ENSMUSG00000026395
Gm28556	3.05549144402915	0.43567352213825	0.926838938983224	0.470063895477028	0.638309368085469	0.999803489356147	ENSMUSG00000099459
Nek7	1989.06004956464	-0.0722107841397266	0.165802605979214	-0.435522612646869	0.663183129129811	0.999803489356147	ENSMUSG00000026393
ENSMUSG00000019230	7.69456263190271	-0.250971308012924	1.48341005404045	-0.169185389656311	0.865650821493572	0.999803489356147	ENSMUSG00000019230
2310009B15Rik	435.639380059503	0.186430121805376	0.326529904335761	0.570943485818302	0.568037952266161	0.999803489356147	ENSMUSG00000079283
Gm37045	3.95843172058952	-0.261337465799512	0.631066673618683	-0.414120213797605	0.678786069799263	0.999803489356147	ENSMUSG00000102365
Dennd1b	957.842443458522	0.104546020283869	0.159328233384904	0.656167573460175	0.51171631022157	0.999803489356147	ENSMUSG00000056268
4930596I21Rik	10.7671007401027	0.13149677571547	0.624568957404965	0.210540043907768	0.83324620145836	0.999803489356147	ENSMUSG00000104900
Zbtb41	400.479765222047	0.0307822993906922	0.200745502673172	0.153339920350834	0.878130221022492	0.999803489356147	ENSMUSG00000033964
Aspm	1576.65439400164	0.14606308964127	0.185660164065189	0.786722829728756	0.431444136744477	0.999803489356147	ENSMUSG00000033952
Gm5837	535.578287200047	0.017751106236576	0.0938030216670765	0.189238106844551	0.849906202262982	0.999803489356147	ENSMUSG00000104496
Gm37599	1.13235474635647	-0.603198946751315	1.22185144573326	-0.49367617385706	0.621534894646516	0.999803489356147	ENSMUSG00000102740
ENSMUSG00000104147	0.803102371097268	0.29049993467831	2.59009175314076	0.112158163634956	0.910698000386687	0.999803489356147	ENSMUSG00000104147
Gm5835	689.678124137107	0.323627100549154	0.178796902057448	1.81002633057463	0.0702917040308727	0.999803489356147	ENSMUSG00000101795
Cdc73	1700.80768397006	0.00612882089705484	0.179686180400903	0.0341084711321742	0.972790653430302	0.999803489356147	ENSMUSG00000026361
Gm6397	4564.63560668439	0.122119677234569	0.117912141633798	1.03568365006751	0.300349752490879	0.999803489356147	ENSMUSG00000089640
Glrx2	471.714957883511	-0.000719971818215999	0.222852797212632	-0.00323070577179719	0.997422274228339	0.999803489356147	ENSMUSG00000018196
Ro60	64.2691036719534	-0.0905293376250455	0.16803775656466	-0.538744026793824	0.590063490338987	0.999803489356147	ENSMUSG00000018199
Uchl5	6064.04100763489	-0.145324423644954	0.188843041397684	-0.769551382827579	0.441566053645091	0.999803489356147	ENSMUSG00000018189
Gm29170	63.5450777662682	-0.201197202316165	0.180924983192258	-1.11204764961822	0.266117663456881	0.999803489356147	ENSMUSG00000100455
Rgs2	36.327652048277	0.38870095171124	0.238062796440633	1.63276646969983	0.102518121599138	0.999803489356147	ENSMUSG00000026360
Rgs13	3.29588212584946	-0.23945324770435	0.711976944544293	-0.336321631675326	0.736628339332652	0.999803489356147	ENSMUSG00000051079
Rgs1	55.2466691202461	-0.256481106498236	0.351225388631343	-0.730246487868353	0.465239531260101	0.999803489356147	ENSMUSG00000026358
Gm7266	36.2888299601239	0.885737199333692	0.303189361257642	2.92139933822089	0.00348462860880518	0.999803489356147	ENSMUSG00000100441
Rgs18	41.2751555726418	-0.215287625259358	0.192041666032386	-1.12104643594922	0.262268096949733	0.999803489356147	ENSMUSG00000026357
Gm5263	40.1974047964079	0.350300251469262	0.37499470519474	0.934147193591297	0.350227970684941	0.999803489356147	ENSMUSG00000090323
ENSMUSG00000102403	2.1337897040076	-2.22896345837169	2.46827192586091	-0.90304614942061	0.366501402417289	0.999803489356147	ENSMUSG00000102403
Gm15583	745.563249227522	0.110932120072388	0.419879796946162	0.264199708771917	0.791626035463292	0.999803489356147	ENSMUSG00000080078
ENSMUSG00000087627	2.09329761497984	0.962191694975438	0.903377921620068	1.06510428464966	0.286828740565869	0.999803489356147	ENSMUSG00000087627
ENSMUSG00000101973	1.55909360017985	-0.717497709533949	2.11047471266789	-0.339969820641417	0.733879255344597	0.999803489356147	ENSMUSG00000101973
Gm15443	2.2129390649173	0.488129542418667	1.50830559244654	0.323627748158713	0.746219877616819	0.999803489356147	ENSMUSG00000082588
Pla2g4a	48.4123443673962	0.0884209034515515	0.319519434785414	0.276730908437336	0.781986736838273	0.999803489356147	ENSMUSG00000056220
ENSMUSG00000097028	1.15438835748863	-1.07118775295259	2.53383539535197	-0.422753488611596	0.672475125680171	0.999803489356147	ENSMUSG00000097028
Ptgs2	13.3599456827405	0.379436675910819	0.430128996758803	0.882146236989436	0.377697731170047	0.999803489356147	ENSMUSG00000032487
Rbm3-ps	818.830504705615	0.119572178676793	0.156855015952899	0.762310200603968	0.445874887236508	0.999803489356147	ENSMUSG00000099875
ENSMUSG00000100690	2.24111736252264	0.224913583854851	0.962327766417469	0.233718273236731	0.815203700609782	0.999803489356147	ENSMUSG00000100690
ENSMUSG00000006007	0.789041904939778	0.808458566836375	1.71280177830758	0.472009415844496	0.636920067782076	0.999803489356147	ENSMUSG00000006007
ENSMUSG00000102990	1.66108069454824	-2.07412315693218	1.74109112559607	-1.19127777199031	0.233544557033863	0.999803489356147	ENSMUSG00000102990
Odr4	1282.12474116481	0.0942195918224784	0.0927461368831526	1.01588696832928	0.30968321521354	0.999803489356147	ENSMUSG00000006010
Tpr	13059.8803380114	0.19913850331085	0.1829763900526	1.08832895464603	0.276449912547975	0.999803489356147	ENSMUSG00000006005
Prg4	13.5611891064554	-0.0601533454238171	0.513154074299463	-0.117222776621107	0.90668351821354	0.999803489356147	ENSMUSG00000006014
Ska2l-ps	2.60812629400285	-0.1549078505746	0.685598049982855	-0.225945582223394	0.821243744893899	0.999803489356147	ENSMUSG00000101519
Gm10138	33.9234468315642	0.799024256628601	0.534589682681223	1.49464960232886	0.13500591358055	0.999803489356147	ENSMUSG00000100954
Ivns1abp	7427.99930082458	-0.150870057966591	0.128840305178717	-1.17098494727497	0.241604827742923	0.999803489356147	ENSMUSG00000023150
Swt1	582.944761962023	0.182230438310657	0.118498256553336	1.53783223155384	0.12408964055241	0.999803489356147	ENSMUSG00000052748
Trmt1l	1000.15842171514	0.0105458408727063	0.0782819542709776	0.134716116516474	0.892836330215404	0.999803489356147	ENSMUSG00000053286
Rnf2	1568.66590389072	-0.0518486057065847	0.0875054934943551	-0.592518293836368	0.55350357425547	0.999803489356147	ENSMUSG00000026484
Gm36527	0.852788037612485	1.21411411168326	2.12628305052143	0.571003052197365	0.567997573877185	0.999803489356147	ENSMUSG00000103238
Gm19503	45.0500246419842	0.191654963613302	0.3439171944911	0.557270664809003	0.577342515358208	0.999803489356147	ENSMUSG00000100551
Fam129a	1097.41861734103	0.303251476232686	0.245867784186835	1.2333924805791	0.217429369058344	0.999803489356147	ENSMUSG00000026483
2810414N06Rik	9.29256392594078	0.100661536760149	0.440957350151667	0.228279530266423	0.819428936946174	0.999803489356147	ENSMUSG00000100594
Edem3	1061.21882195116	0.0509637364937408	0.242512871697678	0.210148583607031	0.83355170775319	0.999803489356147	ENSMUSG00000043019
1700025G04Rik	89.6221943631896	0.210027680436925	0.195445231459291	1.0746114339488	0.282548730567183	0.999803489356147	ENSMUSG00000032666
Tsen15	420.450397416159	-0.113944468651475	0.207675320443587	-0.548666391404109	0.583234414594713	0.999803489356147	ENSMUSG00000014980
Rgl1	121.495831004065	0.213565667737881	0.156510325938319	1.3645468211602	0.172395528683164	0.999803489356147	ENSMUSG00000026482
Gm7278	32.2339261729856	-0.369662140724672	0.272058462409715	-1.35875994244196	0.174222670574176	0.999803489356147	ENSMUSG00000080950
Arpc5	4233.41667175086	-0.109158063273061	0.0777600842901334	-1.40378015622742	0.160384324812335	0.999803489356147	ENSMUSG00000008475
Ncf2	2141.87994770288	0.117017734263452	0.127654160413909	0.916677794785775	0.359311505280758	0.999803489356147	ENSMUSG00000026480
Smg7	2688.15076694772	-0.0640761062686168	0.118096214111753	-0.542575447913872	0.587422147278876	0.999803489356147	ENSMUSG00000042772
Gm28791	2.12556814141663	0.810668788998196	1.21321413525835	0.668199261316362	0.504006406921168	0.999803489356147	ENSMUSG00000100394
ENSMUSG00000099969	1.18901436633036	-1.23013032113082	1.83050762113524	-0.672015951710664	0.501573541206531	0.999803489356147	ENSMUSG00000099969
ENSMUSG00000026479	1.44727559396323	-0.674593058116151	1.27678558607024	-0.528352658015549	0.597254589607197	0.999803489356147	ENSMUSG00000026479
Lamc1	1239.69394927166	0.151608496691763	0.345895223927723	0.438307574675972	0.661163335736674	0.999803489356147	ENSMUSG00000026478
Gm38009	1.92722308456505	3.32747650146429	2.47383487528957	1.34506815095119	0.178603227241953	0.999803489356147	ENSMUSG00000103818
Gm8818	12.382072782504	0.377903322932973	0.45225023255936	0.835606696749175	0.403376200118389	0.999803489356147	ENSMUSG00000079138
E330020D12Rik	201.757465912573	0.0582193016831026	0.152203152129662	0.382510485942536	0.702082752532473	0.999803489356147	ENSMUSG00000073538
Shcbp1l	63.1710578189661	-0.208175875967913	0.209180663750967	-0.995196555145027	0.319640676915398	0.999803489356147	ENSMUSG00000042708
ENSMUSG00000064435	6.11231944002103	0.323494682366341	0.556766732836773	0.581023727330311	0.561224462184562	0.999803489356147	ENSMUSG00000064435
ENSMUSG00000103543	10.3251455117114	0.414678714649595	0.514726106117075	0.805629848032764	0.420456309950033	0.999803489356147	ENSMUSG00000103543
Dhx9	11861.5010918449	0.163693736866249	0.309818205319362	0.528354157553501	0.597253549018076	0.999803489356147	ENSMUSG00000042699
Npl	2.42138622240076	0.0208296218568107	0.777258817232551	0.0267988234999701	0.978620191593218	0.999803489356147	ENSMUSG00000042684
Gm6652	18.1780787826337	-0.480480031118152	0.340718811081708	-1.41019519759632	0.158482053475915	0.999803489356147	ENSMUSG00000099858
Rgs16	22.720545254188	-0.252091139809667	0.253207507440954	-0.995591095846371	0.319448862844843	0.999803489356147	ENSMUSG00000026475
Rnasel	163.593503977179	0.173926402907957	0.160782956339269	1.08174651634688	0.279365177658299	0.999803489356147	ENSMUSG00000066800
Teddm2	4.41629861234086	-0.212690429041994	0.650122969174349	-0.327154152563028	0.743551295421805	0.999803489356147	ENSMUSG00000045968
Glul	1079.81222218033	-0.148034567668761	0.108336839900433	-1.36642870333686	0.171804444722167	0.999803489356147	ENSMUSG00000026473
Cacna1e	160.960250026583	0.160435331423176	0.185887104181353	0.863079405802429	0.388093810049058	0.999803489356147	ENSMUSG00000004110
Gm9530	1.31147942583641	-0.34239016159361	1.2668688227162	-0.270264888877379	0.786956475172465	0.999803489356147	ENSMUSG00000096950
Ier5	3917.99949919867	-0.201329819806262	0.145397237849753	-1.38468806411788	0.166147870344955	0.999803489356147	ENSMUSG00000056708
Mr1	55.8888151205753	0.125732075571467	0.191871739550131	0.655292310718933	0.512279570522584	0.999803489356147	ENSMUSG00000026471
Stx6	1070.42273713362	-0.000481177717816471	0.0672126579102065	-0.00715903421732415	0.994287965919756	0.999803489356147	ENSMUSG00000026470
Gm8850	2.56945530761186	0.184153575850627	1.10582115151	0.166531066618833	0.867739036872241	0.999803489356147	ENSMUSG00000104181
BC034090	3.01306343581498	-1.02729559082365	0.780710028677364	-1.31584782196795	0.188225124653497	0.999803489356147	ENSMUSG00000033722
Xpr1	402.156381915726	0.039955993042185	0.190513337775557	0.209728061608247	0.833879922590078	0.999803489356147	ENSMUSG00000026469
Gm5532	0.872448409055533	1.60355741226755	1.48256282255659	1.08161177919079	0.279425068263222	0.999803489356147	ENSMUSG00000073535
Acbd6	1735.122110129	0.028710740519817	0.201153194542856	0.142730721155414	0.886502853141082	0.999803489356147	ENSMUSG00000033701
Qsox1	148.731485640881	0.268813264590185	0.178747147117308	1.50387443338476	0.132613701131636	0.999803489356147	ENSMUSG00000033684
Cep350	1221.47704494396	0.246080685580272	0.240248573914405	1.02427532272448	0.305705250313152	0.999803489356147	ENSMUSG00000033671
Gm9694	0.715484580422066	-1.5789778627353	1.70752712968666	-0.924716120337748	0.355113591889378	0.999803489356147	ENSMUSG00000102833
Tor1aip1	2119.11751895516	0.0427632589304408	0.180775612111987	0.236554358360849	0.813002531988076	0.999803489356147	ENSMUSG00000026466
9430034N14Rik	17.0007275069418	0.891460895089361	0.362995906206173	2.45584283416969	0.0140554613356269	0.999803489356147	ENSMUSG00000102964
Tor1aip2	1862.94488793867	-0.113422449518687	0.110025979502893	-1.03086970941898	0.302601922893358	0.999803489356147	ENSMUSG00000050565
ENSMUSG00000015484	1.76085904929451	-0.0397689934805102	1.81454692633836	-0.021916762197361	0.982514353686714	0.999803489356147	ENSMUSG00000015484
Axdnd1	5.16817890345237	-0.0756234294778806	0.467811055127729	-0.161653788744331	0.871578497027315	0.999803489356147	ENSMUSG00000026601
Gm2000	5812.18417266194	0.240788198149208	0.419396525622146	0.57413016903756	0.565879719363477	0.999803489356147	ENSMUSG00000078193
Soat1	927.368959221403	-0.0618976820251381	0.158529330063731	-0.390449401383671	0.696204263793486	0.999803489356147	ENSMUSG00000026600
Csnk2a3	789.363188478309	-0.000336533970836583	0.190973519353087	-0.00176220227797327	0.998593966737099	0.999803489356147	ENSMUSG00000101523
Abl2	461.887293875249	0.147203127054677	0.250831555939248	0.586860478951578	0.557297414434922	0.999803489356147	ENSMUSG00000026596
Gm38043	2.58056081782969	1.74710480754475	1.22058810728734	1.43136312496731	0.152326170980784	0.999803489356147	ENSMUSG00000104293
Tor3a	2828.48105206638	0.0271429250728732	0.101336009290881	0.26785073995721	0.788814212356403	0.999803489356147	ENSMUSG00000060519
Fam20b	830.116397028687	0.00844293576372367	0.309704956259214	0.02726122263493	0.978251385219454	0.999803489356147	ENSMUSG00000033557
Gm15428	60.6046755374767	-0.427274195968948	0.433134829194421	-0.986469263540009	0.323902890917406	0.999803489356147	ENSMUSG00000046057
Ralgps2	2796.51702115636	-0.0696043450834904	0.085053528711766	-0.818359286648405	0.413152062138655	0.999803489356147	ENSMUSG00000026594
Gm28693	1.18380783747398	0.920018789546455	1.26714417572117	0.726056913786344	0.467803880994824	0.999803489356147	ENSMUSG00000101964
Gm37802	6.69163706460169	0.108299326111924	0.700432369888536	0.154617820031872	0.877122620594029	0.999803489356147	ENSMUSG00000103303
Gm37943	6.30983712995392	1.72369402784552	0.943167615083839	1.82755853814202	0.0676158332085084	0.999803489356147	ENSMUSG00000102960
4930439D14Rik	6.86378347829381	0.465344326367229	0.505251683375981	0.921014895502971	0.357042650256426	0.999803489356147	ENSMUSG00000101905
Gm28694	1.1166154323414	-0.726859807711765	1.1626329796764	-0.625184233044959	0.531850148870359	0.999803489356147	ENSMUSG00000101768
Gm10531	1.07710312147627	1.17945100450393	1.52277812413778	0.774538973083656	0.438612130316167	0.999803489356147	ENSMUSG00000103325
Rasal2	48.1746300500895	0.2287713959587	0.262941197254646	0.870047745835531	0.38427431218201	0.999803489356147	ENSMUSG00000070565
2810025M15Rik	149.392090542016	0.158547427172523	0.239031703119967	0.663290371541009	0.507144601969445	0.999803489356147	ENSMUSG00000049881
Cryzl2	105.545959795094	-0.059054717332364	0.173876712589656	-0.339635575419069	0.734130983719464	0.999803489356147	ENSMUSG00000033488
Sec16b	1.70511791944755	0.474042786385519	1.08565344990178	0.4366428222822	0.66237040180622	0.999803489356147	ENSMUSG00000026589
ENSMUSG00000026587	1.069015433147	-0.570781842039219	2.54415828001641	-0.224349973239691	0.822484994050713	0.999803489356147	ENSMUSG00000026587
ENSMUSG00000102508	4.42769079136617	-0.741295973284913	1.45565304168508	-0.509253202553529	0.61057475555356	0.999803489356147	ENSMUSG00000102508
ENSMUSG00000073530	1.97715818871243	0.190534305229899	1.17427229939696	0.162257344678697	0.871103203507656	0.999803489356147	ENSMUSG00000073530
Gm4953	2.3677240425571	0.921271865984471	0.994714248639188	0.92616735634863	0.354359014138204	0.999803489356147	ENSMUSG00000061992
Cop1	2406.62225795554	-0.0710493683412177	0.0754225076890789	-0.942018112605206	0.346183366731752	0.999803489356147	ENSMUSG00000040782
Gm37115	1.35078215007302	-0.37583181036407	1.12013389689564	-0.335524004233475	0.737229840320434	0.999803489356147	ENSMUSG00000103572
ENSMUSG00000103186	1.05221060995504	-1.19510534502959	2.1154332903354	-0.564945890985817	0.572110568389392	0.999803489356147	ENSMUSG00000103186
4930523C07Rik	708.624828730764	0.117378978153892	0.16084642127293	0.729758096107836	0.465538062576919	0.999803489356147	ENSMUSG00000090394
4930562F07Rik	1.95313603551054	-0.868822625865819	0.915380641903221	-0.949138081027582	0.342550388557915	0.999803489356147	ENSMUSG00000026729
Mrps14	1563.72212963975	0.0300811823778116	0.30575899356978	0.0983820035074339	0.921628964468788	0.999803489356147	ENSMUSG00000058267
Cacybp	16254.1918803039	-0.239369611985466	0.152353919655063	-1.57114180276694	0.116149714516602	0.999803489356147	ENSMUSG00000014226
4933417C20Rik	7.7046156666101	0.125499612091919	0.478323826169331	0.262373741858075	0.793033314713811	0.999803489356147	ENSMUSG00000103006
Rabgap1l	2111.70749710802	0.0214821267800054	0.146665929600557	0.146469782303987	0.883550542857789	0.999803489356147	ENSMUSG00000026721
ENSMUSG00000118401	4.42133883739718	1.06404084340586	0.633760705032095	1.6789315509108	0.0931653846774355	0.999803489356147	ENSMUSG00000118401
Gm37215	3.45698888165082	2.87875101603406	1.71800906902437	1.67563202542863	0.0938102918031335	0.999803489356147	ENSMUSG00000104020
ENSMUSG00000103391	1.0670840263981	-0.034322562643364	1.77310954619903	-0.0193572713637126	0.984556096527596	0.999803489356147	ENSMUSG00000103391
Gm37328	3.73264974431208	0.18320954755077	0.778427978323086	0.235358379519511	0.81393058711053	0.999803489356147	ENSMUSG00000103200
Gm38329	21.2181094458712	-0.632501413857111	0.42093706908476	-1.50260326379036	0.132941381258751	0.999803489356147	ENSMUSG00000103632
Gm38126	4.50999187211786	-0.064041951628048	1.21647933863253	-0.052645326224808	0.95801450191586	0.999803489356147	ENSMUSG00000104053
Gm37083	1.07154278284511	0.041726955161567	1.12216251690302	0.0371844136059065	0.970337966158671	0.999803489356147	ENSMUSG00000102852
Gm6177	0.916838382693399	0.0472326562919471	1.50162203109712	0.0314544241585466	0.974907138395741	0.999803489356147	ENSMUSG00000057499
Rc3h1	719.562442275809	-0.0399361822748802	0.112982806922968	-0.353471323314784	0.723735123692921	0.999803489356147	ENSMUSG00000040423
Gm37653	1.89891275011801	-0.119403694125671	0.847117318866239	-0.140952960666036	0.887907103186165	0.999803489356147	ENSMUSG00000103739
Serpinc1	14.8892754387556	-0.107083672173876	0.321768413579075	-0.332797340120396	0.739287266183061	0.999803489356147	ENSMUSG00000026715
Zbtb37	179.568479630721	0.192986751003102	0.198430377441896	0.97256656713064	0.330768765683627	0.999803489356147	ENSMUSG00000043467
Gm37362	3.36004270160976	0.0523840317600575	0.714017778414313	0.0733651644870688	0.941515537578262	0.999803489356147	ENSMUSG00000104016
Gas5	11786.3366548623	0.0984218527385111	0.258553548589594	0.380663322067714	0.703453088121556	0.999803489356147	ENSMUSG00000053332
Dars2	624.887569769212	-0.0496420077607203	0.148662266846554	-0.333924732978542	0.738436355769762	0.999803489356147	ENSMUSG00000026709
Cenpl	390.733366946266	-0.0423751941276194	0.153911041280777	-0.275322639461033	0.783068372562531	0.999803489356147	ENSMUSG00000026708
Klhl20	629.128993362063	0.0908798891752997	0.284266154337553	0.319699998711011	0.749195760759295	0.999803489356147	ENSMUSG00000026705
ENSMUSG00000044835	2.44033079403321	-0.197225990010586	0.902129467644386	-0.21862271113433	0.826943959810678	0.999803489356147	ENSMUSG00000044835
ENSMUSG00000049160	1.51122009092843	-0.0400259345647989	1.09151927990345	-0.0366699290628557	0.970748185641531	0.999803489356147	ENSMUSG00000049160
ENSMUSG00000102817	1.35054186570574	-0.66281758368085	1.14917613432392	-0.576776321647856	0.564090566990044	0.999803489356147	ENSMUSG00000102817
Prdx6	2019.24761485531	-0.17645995476294	0.174407070221375	-1.01177064977331	0.311647726390589	0.999803489356147	ENSMUSG00000026701
Tnfsf4	5.08404956479737	0.162189801990017	0.514970625820287	0.314949618207191	0.752799907322206	0.999803489356147	ENSMUSG00000026700
Tnfsf18	2.15839947334812	0.365150668225957	0.839562141700597	0.434929887960784	0.663613319447118	0.999803489356147	ENSMUSG00000066755
Gm15429	296.483551966813	-0.0975488768503737	0.117690059398722	-0.828862499932029	0.407182217195585	0.999803489356147	ENSMUSG00000040323
Fasl	0.847229494055305	-1.94850697557856	1.65981074741075	-1.17393322016872	0.240421774996853	0.999803489356147	ENSMUSG00000000817
ENSMUSG00000103625	0.96703947144487	-0.952291152913703	1.30003474165726	-0.73251208017698	0.463856072171313	0.999803489356147	ENSMUSG00000103625
Suco	1516.45886664175	0.0168715292393715	0.136947789313822	0.12319679875014	0.901951260486791	0.999803489356147	ENSMUSG00000040297
ENSMUSG00000086277	2.7339007961175	0.381598982766292	1.04496954238894	0.365177134152546	0.714979185719439	0.999803489356147	ENSMUSG00000086277
Pigc	270.0703538428	0.065443057301565	0.116396938005397	0.562240368372326	0.573952260782477	0.999803489356147	ENSMUSG00000026698
Dnm3	9.7665495387495	0.0940280091680539	0.506295785683959	0.185717542643636	0.85266627060992	0.999803489356147	ENSMUSG00000040265
ENSMUSG00000078190	1.43730740093328	-1.09092025676297	1.56518956613493	-0.696989221220584	0.485809539387563	0.999803489356147	ENSMUSG00000078190
Eef1aknmt	727.451602866149	-0.038972318073161	0.123510088017896	-0.315539553882548	0.752352024085578	0.999803489356147	ENSMUSG00000026694
Vamp4	810.351114805373	0.00390904905338673	0.172730991696025	0.0226308493629559	0.981944735891926	0.999803489356147	ENSMUSG00000026696
Prrc2c	7939.9029791023	0.258668671670769	0.241207439887332	1.07239093367764	0.283544478433921	0.999803489356147	ENSMUSG00000040225
ENSMUSG00000098259	6.08128439751019	-0.640211576192715	0.536711425899636	-1.1928413394956	0.23293151650476	0.999803489356147	ENSMUSG00000098259
ENSMUSG00000095576	0.799172834393559	2.56943699766017	3.04715402840199	0.843225177890876	0.399102519618749	0.999803489356147	ENSMUSG00000095576
Gorab	199.598406009142	-0.0543339810943608	0.156089880393916	-0.348094193917253	0.727769444578133	0.999803489356147	ENSMUSG00000040124
Rpsa-ps1	39.0379911058641	0.651067226636606	0.568809294742238	1.14461425411771	0.252368984984164	0.999803489356147	ENSMUSG00000102117
Kifap3	233.851810163276	0.0306342249667033	0.103539854791042	0.295868919543373	0.767330187569109	0.999803489356147	ENSMUSG00000026585
Scyl3	846.115751534004	-0.0842925762732551	0.150675790241348	-0.559430125690647	0.575868206173987	0.999803489356147	ENSMUSG00000026584
BC055324	667.658668430664	0.14424269115808	0.150395643450641	0.959088227880879	0.337514300348081	0.999803489356147	ENSMUSG00000041406
Mettl18	440.771294499476	-0.0461235858394847	0.244632457817525	-0.188542380070796	0.850451496690455	0.999803489356147	ENSMUSG00000041396
Sele	2.38913463268928	0.528410477373151	0.809863401455439	0.652468646469915	0.514098892765285	0.999803489356147	ENSMUSG00000026582
Sell	4253.28454867628	-0.0157733187427129	0.16952444322372	-0.0930445099406519	0.925868200750178	0.999803489356147	ENSMUSG00000026581
Selp	1.89657355356021	0.565178693704244	1.0012142566409	0.564493254021805	0.572418489908987	0.999803489356147	ENSMUSG00000026580
Slc19a2	327.540496084574	-0.137061237713065	0.156514886862795	-0.875707355768763	0.381189145475383	0.999803489356147	ENSMUSG00000040918
Ccdc181	581.22311055077	0.103279250550116	0.0983872853722629	1.04972151797199	0.29384616756071	0.999803489356147	ENSMUSG00000026578
Blzf1	578.90241851557	-0.0232033465229078	0.0915766731380866	-0.2533761680545	0.799977542054035	0.999803489356147	ENSMUSG00000026577
Nme7	460.194745250548	-0.10910249747796	0.108195114099442	-1.00838654671305	0.313268928904061	0.999803489356147	ENSMUSG00000026575
Atp1b1	44.0309674950267	-0.110237644273571	0.322285514099969	-0.342049640615793	0.732313534989208	0.999803489356147	ENSMUSG00000026576
Gm26685	0.835214132138216	-1.20638105136748	1.80185529715925	-0.669521605463781	0.503162803269507	0.999803489356147	ENSMUSG00000097281
ENSMUSG00000102389	1.26204071261207	-1.21427567717199	1.50338675349929	-0.807693478970492	0.419267058485167	0.999803489356147	ENSMUSG00000102389
Gm16550	5.11595710474677	-0.375548781963358	0.50195387356121	-0.748173889562708	0.454355278049213	0.999803489356147	ENSMUSG00000089967
Sft2d2	1445.44894006191	0.178734417714066	0.146689587542712	1.21845333883718	0.223051746261868	0.999803489356147	ENSMUSG00000040848
Tiprl	1248.98023397829	-0.228940602158111	0.171448545464332	-1.33533125952206	0.181767951972783	0.999803489356147	ENSMUSG00000040843
Gm38190	17.3024834015447	-0.383305308773444	0.623068982729765	-0.615189199587696	0.53842977957381	0.999803489356147	ENSMUSG00000102302
ENSMUSG00000040836	0.923865060082692	0.0131093999219909	1.45859459117975	0.00898769267434868	0.992828955322541	0.999803489356147	ENSMUSG00000040836
Dcaf6	417.852890209936	-0.0569633538650006	0.141546728119032	-0.402434974103378	0.687363935161485	0.999803489356147	ENSMUSG00000026571
Mpc2	843.514889979833	0.0855618027929445	0.396081202864546	0.216020861818594	0.828971486086514	0.999803489356147	ENSMUSG00000026568
Mpzl1	99.8764985209408	-0.0396652478658426	0.316464679232767	-0.125338625346773	0.900255474670498	0.999803489356147	ENSMUSG00000026566
Gm18407	1.17715054888305	-0.217647279491633	1.15545571144014	-0.188364882649081	0.850590626495104	0.999803489356147	ENSMUSG00000104517
Rcsd1	2380.6180486311	0.00843078641776807	0.25712114474115	0.0327891602468382	0.973842722436061	0.999803489356147	ENSMUSG00000040723
ENSMUSG00000103686	1.36721294235566	-0.560069190701673	1.00872158195617	-0.555226735226144	0.578739584315588	0.999803489356147	ENSMUSG00000103686
Creg1	357.580801893275	0.0389102742261328	0.21491793537497	0.1810471246071	0.856330587065279	0.999803489356147	ENSMUSG00000040713
Gm16565	0.985198870533414	-1.06075804264823	1.19894729474494	-0.884741178613607	0.376296240808725	0.999803489356147	ENSMUSG00000089829
Pou2f1	436.970828947031	0.381398074142727	0.225047099804127	1.69474778601761	0.0901232763636839	0.999803489356147	ENSMUSG00000026565
Gm15853	11.4970305484375	-0.271744530140903	0.349886353812651	-0.776665129061909	0.437356365319813	0.999803489356147	ENSMUSG00000103400
Tada1	372.990245122164	-0.176568204131056	0.290865032449506	-0.607045139266468	0.543820956340249	0.999803489356147	ENSMUSG00000026563
Pogk	316.812520799865	0.272743912434144	0.274189914867848	0.994726274179702	0.319869412081312	0.999803489356147	ENSMUSG00000040596
Gm16418	5.00122850928102	0.319264105873589	0.565695180380693	0.564374802802343	0.572499083327214	0.999803489356147	ENSMUSG00000084093
Gm6286	370.654343164391	0.138298317556867	0.160774089827447	0.860202770889875	0.389677277535137	0.999803489356147	ENSMUSG00000086925
ENSMUSG00000097823	1.59441285120138	0.81251980440685	0.951150145044518	0.854249782371447	0.392966605166785	0.999803489356147	ENSMUSG00000097823
Gm17868	1.56511641600552	1.70171761746353	1.28122183952836	1.32819904013653	0.184112361431273	0.999803489356147	ENSMUSG00000102870
Uck2	3306.98605855036	-0.0252650084055922	0.135925496834778	-0.185873945609355	0.852543614521824	0.999803489356147	ENSMUSG00000026558
Gm2453	1.86710919383487	0.787225565862033	1.07241281173801	0.734069527373709	0.462906364477346	0.999803489356147	ENSMUSG00000102909
Tmco1	2601.92398062876	-0.0613820764097798	0.097022201583305	-0.632660106739343	0.526955626547533	0.999803489356147	ENSMUSG00000052428
Gm25911	93.8441992710599	2.23700071008363	0.777131643865458	2.87853509471931	0.00399526824927749	0.999803489356147	ENSMUSG00000088246
Aldh9a1	1473.07266232251	0.0080644990370463	0.1976345098261	0.0408051156862347	0.967451261029538	0.999803489356147	ENSMUSG00000026687
Mgst3	10.5028425055864	-0.214817301074336	0.538530729593795	-0.398895159123732	0.689970456264285	0.999803489356147	ENSMUSG00000026688
Pbx1	24.6713238459132	0.213779135877327	0.244969377750692	0.872676976364335	0.382839170432287	0.999803489356147	ENSMUSG00000052534
Nuf2	4004.1404794745	-0.107145102999846	0.127693752504144	-0.839078662022788	0.401425169196444	0.999803489356147	ENSMUSG00000026683
ENSMUSG00000026678	1.63738010014821	-0.359189534254194	2.15042264901504	-0.16703206433336	0.867344819630964	0.999803489356147	ENSMUSG00000026678
Hsd17b7	548.417752066586	-0.0427001329882664	0.233310943790598	-0.18301813148804	0.854783792029699	0.999803489356147	ENSMUSG00000026675
3110045C21Rik	25.5867310111866	-0.00254614353500096	0.286762482502586	-0.00887892834788109	0.99291573323667	0.999803489356147	ENSMUSG00000097503
Ddr2	0.946836630625246	0.880336852451555	1.35822379987659	0.648153016116742	0.516885986857096	0.999803489356147	ENSMUSG00000026674
Uap1	1050.97055296205	-0.140240257846796	0.151322510026169	-0.926764020914956	0.354049069281771	0.999803489356147	ENSMUSG00000026670
Uhmk1	2246.47395873532	0.156807571899245	0.227414716781915	0.689522534505184	0.490494497336652	0.999803489356147	ENSMUSG00000026667
Sh2d1b1	3.67619172695452	-0.498043625340066	0.950182018217426	-0.524156020416396	0.600170027225896	0.999803489356147	ENSMUSG00000102418
Gm7694	1.53589529009799	0.969788423073523	1.22179751491387	0.793739069883351	0.427347350251859	0.999803489356147	ENSMUSG00000102752
Nos1ap	1.82489951918615	0.496369944459678	1.1032731143255	0.449906680417153	0.652777730440096	0.999803489356147	ENSMUSG00000038473
Gm7299	12.2207301949914	-0.201170279956299	0.498334146309756	-0.40368552194546	0.686443987462996	0.999803489356147	ENSMUSG00000102193
Olfml2b	9.32984019374203	-0.238061304228329	0.406636548197437	-0.585440008488223	0.558251893725209	0.999803489356147	ENSMUSG00000038463
Atf6	2227.79399874839	0.182051533507423	0.127984924194513	1.42244514073188	0.154897066571005	0.999803489356147	ENSMUSG00000026663
Gm9929	29.9105988629471	-0.0465903748679528	0.30143030310557	-0.154564336723755	0.877164787219979	0.999803489356147	ENSMUSG00000053925
Dusp12	260.090392428905	-0.256299237287718	0.244037011182363	-1.05024740323586	0.293604380354974	0.999803489356147	ENSMUSG00000026659
Gm26620	5.6953431394946	-0.715732093171829	0.502471409715429	-1.42442351810062	0.154323910275472	0.999803489356147	ENSMUSG00000096968
Fcrlb	14.1106212919781	0.348155359089303	0.376162913515791	0.925544083639941	0.354682963883155	0.999803489356147	ENSMUSG00000070524
Fcrla	126.703788323813	-0.0758277209315248	0.163314999729287	-0.46430346910705	0.642430338876734	0.999803489356147	ENSMUSG00000038421
Gm2962	79.715088300396	0.114435752804284	0.416770972772037	0.274577070574627	0.783641184495114	0.999803489356147	ENSMUSG00000089838
Fcgr2b	2315.14551471158	-0.0401258209657557	0.112821258004595	-0.355658336695035	0.722096449946374	0.999803489356147	ENSMUSG00000026656
Gm38204	2.60727851458658	1.47337980486969	0.932922311311644	1.57931672016525	0.114263428600959	0.999803489356147	ENSMUSG00000103676
Gm10522	5.66634084840981	0.152393463447361	0.529552856772941	0.287777625025075	0.773516965812497	0.999803489356147	ENSMUSG00000104340
Fcgr4	70.1539423379207	0.0203703574278444	0.213446387553474	0.0954354752091605	0.923968939517569	0.999803489356147	ENSMUSG00000059089
Fcgr3	23.7918281289726	-0.0590840199074673	0.297714648370697	-0.198458558323604	0.842686305501674	0.999803489356147	ENSMUSG00000059498
Cfap126	20.739317996236	0.331038975776609	0.317991383219549	1.04103127708983	0.297861032434548	0.999803489356147	ENSMUSG00000026649
Sdhc	2883.41507617688	-0.0157091959205277	0.325666089289393	-0.0482371251941073	0.961527262985592	0.999803489356147	ENSMUSG00000058076
ENSMUSG00000056569	1.48801782021569	-0.00582662457428678	1.11316370406646	-0.00523429263189388	0.995823657792741	0.999803489356147	ENSMUSG00000056569
ENSMUSG00000038370	1.5374860494228	-0.868795941473159	0.972618589166346	-0.893254510195845	0.371720892692974	0.999803489356147	ENSMUSG00000038370
Nr1i3	1.48341964925047	0.467814795258738	0.923143770197958	0.506762662936479	0.612321356925364	0.999803489356147	ENSMUSG00000005677
Tomm40l	192.525919838886	-0.0411960448734773	0.140501956168818	-0.293206201513514	0.769364544179866	0.999803489356147	ENSMUSG00000005674
Apoa2	12.7680153251981	0.287151433177935	0.401490336914874	0.71521380909055	0.47447693746597	0.999803489356147	ENSMUSG00000005681
Fcer1g	7.55223920818323	-0.63158579540459	0.471573766949028	-1.33931494851973	0.1804681643289	0.999803489356147	ENSMUSG00000058715
Ndufs2	4825.94862169993	-0.0809077862034814	0.124508554042357	-0.649817089482519	0.515810378717767	0.999803489356147	ENSMUSG00000013593
ENSMUSG00000006403	1.28198960033659	-0.42324441901723	1.14608032483133	-0.369297343167914	0.711906105662158	0.999803489356147	ENSMUSG00000006403
B4galt3	160.199526668123	0.118180137160116	0.267806386749227	0.44128946510443	0.659003451878612	0.999803489356147	ENSMUSG00000052423
Ppox	245.129887561398	0.0904122039888798	0.125513414845675	0.720338970141524	0.471316316257853	0.999803489356147	ENSMUSG00000062729
Usp21	527.573906509787	-0.0565071805866863	0.108865041987161	-0.519057169824547	0.603720874624969	0.999803489356147	ENSMUSG00000053483
Ufc1	1851.56596672031	0.100302486343202	0.369769082906634	0.271257092547482	0.786193304836726	0.999803489356147	ENSMUSG00000062963
Gm20045	39.4887277747073	0.112428028186215	0.383118900172085	0.293454664167483	0.769174647559263	0.999803489356147	ENSMUSG00000103983
Dedd	104.691940097231	0.0693741384472079	0.203525657067127	0.34086188172495	0.733207562102246	0.999803489356147	ENSMUSG00000013973
Nit1	384.369473852689	0.0375394362540447	0.0818983464435537	0.458366229407547	0.646689349553968	0.999803489356147	ENSMUSG00000013997
Pfdn2	3161.31550744393	0.0586335856196138	0.228748131069631	0.256323779982123	0.79770083669335	0.999803489356147	ENSMUSG00000006412
ENSMUSG00000102929	6.58110876836906	0.622346467011765	0.625613151839019	0.994778426863867	0.319844040792368	0.999803489356147	ENSMUSG00000102929
Klhdc9	2.39413409347438	-0.227629998221969	0.848404627068125	-0.268303579400082	0.788465651238306	0.999803489356147	ENSMUSG00000045259
Nectin4	8.27877706474877	-0.0422496838362528	0.41291701217834	-0.102320036690581	0.918502651794845	0.999803489356147	ENSMUSG00000006411
Arhgap30	12000.710384544	0.260564223424869	0.146931161626414	1.77337618882628	0.0761663918898771	0.999803489356147	ENSMUSG00000048865
Usf1	1837.18974065955	0.189848450427458	0.291497328568445	0.651287102217408	0.514861172643742	0.999803489356147	ENSMUSG00000026641
Tstd1	20.7202067378958	-0.355693363828598	0.307788933715113	-1.15564052136398	0.247828226177084	0.999803489356147	ENSMUSG00000103711
F11r	9.38751191981636	-0.211609251590484	0.49907306944835	-0.424004548721464	0.671562495940442	0.999803489356147	ENSMUSG00000038235
B930036N10Rik	9.76626105426207	-0.151434167292239	0.692764107733734	-0.218594129807953	0.826966225956654	0.999803489356147	ENSMUSG00000091993
Alyref2	108.667869474755	-0.341265770044931	0.39977420451355	-0.85364629881557	0.393300997116624	0.999803489356147	ENSMUSG00000060244
ENSMUSG00000038209	7.58739823230028	0.068888783763938	0.516081091621863	0.133484417240408	0.89381028722501	0.999803489356147	ENSMUSG00000038209
Cd244a	27.6187205535077	0.12952485491321	0.303992993404691	0.426078421948298	0.670050702958957	0.999803489356147	ENSMUSG00000004709
Ly9	2207.47524547902	0.0939000035005367	0.1197008391439	0.78445568278476	0.432772776280835	0.999803489356147	ENSMUSG00000004707
Slamf7	1697.19109111647	0.110759228268672	0.175318597527659	0.631759721048409	0.52754389721245	0.999803489356147	ENSMUSG00000038179
Gm37787	22.4112247981092	-0.12625395663166	0.475547720705598	-0.265491665997957	0.790630729151692	0.999803489356147	ENSMUSG00000103219
A630035G10Rik	13.4249956860016	0.182081662748249	0.427499617357128	0.425922399355367	0.670164392486996	0.999803489356147	ENSMUSG00000103083
Gm37981	2.41944383742147	0.918787992629986	0.861718625384868	1.06622738045105	0.286320867736323	0.999803489356147	ENSMUSG00000103137
Cd48	1161.79878133253	-0.22637452999702	0.104532932122189	-2.16558098391817	0.030343220807574	0.999803489356147	ENSMUSG00000015355
Tma7-ps	93.5561437246528	-0.0960283986569531	0.278654413944147	-0.344614669108384	0.730384076268418	0.999803489356147	ENSMUSG00000059058
Slamf1	282.512176963033	0.138618192331348	0.173669827805466	0.798170839937834	0.424771356796995	0.999803489356147	ENSMUSG00000015316
Cd84	642.778446285538	-0.132310550437206	0.170184258000637	-0.777454695232218	0.436890553735598	0.999803489356147	ENSMUSG00000038147
ENSMUSG00000073492	15.3519944766976	0.248521361138594	0.368530394617314	0.67435784067868	0.500083839238046	0.999803489356147	ENSMUSG00000073492
Gm37065	44.5624914203154	0.0500368659007595	0.334409205578813	0.1496276569724	0.881058386713224	0.999803489356147	ENSMUSG00000104413
Slamf6	2247.73922623716	0.00643217041457198	0.1296764731564	0.0496016760635856	0.960439810972382	0.999803489356147	ENSMUSG00000015314
Vangl2	177.057271039343	0.412274274616473	0.282154457594356	1.46116520054837	0.143970110587203	0.999803489356147	ENSMUSG00000026556
Ncstn	785.069467334456	-0.0510305150094065	0.236260203900526	-0.21599285096229	0.828993320150677	0.999803489356147	ENSMUSG00000003458
Copa	4895.53765631523	0.158261909204105	0.30179074699499	0.524409415397791	0.599993809215506	0.999803489356147	ENSMUSG00000026553
ENSMUSG00000102779	3.33133267911871	-0.883198520544779	0.959687109299325	-0.920298409748996	0.357416839875706	0.999803489356147	ENSMUSG00000102779
Pex19	644.793923528697	-0.0583581404553193	0.111020365253961	-0.525652571236133	0.599129622989313	0.999803489356147	ENSMUSG00000003464
Gm10171	1671.64743506668	-0.182428061089465	0.269461374636569	-0.677010058809025	0.49839957231555	0.999803489356147	ENSMUSG00000089803
Dcaf8	3132.93744530603	0.0894997323162777	0.202047770825848	0.442963225728537	0.657792334161622	0.999803489356147	ENSMUSG00000026554
Pea15a	317.22703195421	0.136263833784546	0.14821219694119	0.91938340161448	0.357895068040841	0.999803489356147	ENSMUSG00000013698
ENSMUSG00000007122	2.99911043027384	0.701567074908855	0.634601684456416	1.10552349937394	0.268932817670962	0.999803489356147	ENSMUSG00000007122
Igsf8	351.877266523638	-0.0698418842540578	0.125624100588571	-0.555959277931833	0.578238693332945	0.999803489356147	ENSMUSG00000038034
ENSMUSG00000007097	1.682440803177	-0.980752794224384	1.21381271732002	-0.807993506930617	0.41909432000728	0.999803489356147	ENSMUSG00000007097
Kcnj9	1.64898596204547	0.547569892313062	0.913920750820146	0.599143735188939	0.54907703904882	0.999803489356147	ENSMUSG00000038026
Kcnj10	2.51050970064835	0.399382317452815	0.732572632884334	0.545177774223342	0.585631256130862	0.999803489356147	ENSMUSG00000044708
Pigm	1025.76956967276	-0.0828946652763116	0.106283620852598	-0.779938287869176	0.435427200426703	0.999803489356147	ENSMUSG00000050229
Gm37145	27.437338966348	-0.000812895527578837	0.251342895574768	-0.00323420928894734	0.9974194788407	0.999803489356147	ENSMUSG00000102278
Slamf9	15.965809094903	-0.0570262717781042	0.417413199400941	-0.136618276230715	0.8913325296144	0.999803489356147	ENSMUSG00000026548
Igsf9	23.3110491813884	-0.419232549450985	0.513645741893957	-0.816190061082092	0.414391440407707	0.999803489356147	ENSMUSG00000037995
Tagln2	4172.8487330303	-0.0333629616037528	0.0546267844944678	-0.610743647324354	0.541369305504025	0.999803489356147	ENSMUSG00000026547
Gm37125	5.742089132867	0.219535925628276	0.595570162488043	0.368614714866082	0.712414925933309	0.999803489356147	ENSMUSG00000104351
Cfap45	9.92047212896185	0.706936561269843	0.371854189616679	1.90111226660799	0.0572873092279317	0.999803489356147	ENSMUSG00000026546
4933439K11Rik	2.46276116474313	-0.2707764807918	0.748192232800363	-0.361907634055926	0.717421054954285	0.999803489356147	ENSMUSG00000085184
Slamf8	0.991273854699043	0.212809913032247	1.3213814412309	0.161051083655306	0.872053166793157	0.999803489356147	ENSMUSG00000053318
Dusp23	39.8324674470038	0.483159309772855	0.375050593818903	1.28825101929089	0.197658597305712	0.999803489356147	ENSMUSG00000026544
Gm2710	886.839661342982	-0.0988440557661045	0.230662806183732	-0.428521864454261	0.668271218583034	0.999803489356147	ENSMUSG00000060128
ENSMUSG00000037942	5.05813421794226	-0.701171083527411	0.633113349471828	-1.10749691838335	0.268079143901543	0.999803489356147	ENSMUSG00000037942
ENSMUSG00000026542	0.927223773095397	-0.440055245747997	1.76047370102876	-0.249964112210733	0.802615102086432	0.999803489356147	ENSMUSG00000026542
ENSMUSG00000062527	2.3370787135706	-1.32795565219852	1.79571153487826	-0.739515020316753	0.459594322407319	0.999803489356147	ENSMUSG00000062527
Aim2	1547.36023542579	0.0248819189336318	0.117518636709084	0.211727430052024	0.832319687124509	0.999803489356147	ENSMUSG00000037860
Ifi206	1396.5400581284	0.00653114933746295	0.230798202387355	0.0282980944821293	0.977424400375645	0.999803489356147	ENSMUSG00000037849
Ifi214	483.129843542763	0.0554312628385016	0.249794517462458	0.22190744377259	0.824385935703352	0.999803489356147	ENSMUSG00000070501
ENSMUSG00000104989	2.91458973603752	-0.44368341594984	0.677589080316852	-0.654797175512873	0.512598349404598	0.999803489356147	ENSMUSG00000104989
Ifi213	580.721447857016	-0.0402161930981217	0.191251764998522	-0.210278807614834	0.83345007459396	0.999803489356147	ENSMUSG00000073491
Ifi209	2478.9125961405	-0.0598690960122392	0.191276858790169	-0.312997068181236	0.75428288957789	0.999803489356147	ENSMUSG00000043263
ENSMUSG00000106299	3.80250568623217	0.543175419780725	1.01337537025038	0.536006139212283	0.591954307512785	0.999803489356147	ENSMUSG00000106299
Ifi208	226.555647165243	0.13436675958474	0.332519231407234	0.404087183216725	0.686148609527559	0.999803489356147	ENSMUSG00000066677
Gm18752	6.24634075658255	-0.0145936603178012	0.498940552373106	-0.029249296831836	0.976665764847087	0.999803489356147	ENSMUSG00000103105
Ifi207	108.512211331663	0.211848726885204	0.33428618326269	0.633734618695649	0.526254028251897	0.999803489356147	ENSMUSG00000073490
Ifi204	233.571224154982	-0.188543698373966	0.319697460560369	-0.589756634423947	0.555353819926295	0.999803489356147	ENSMUSG00000073489
Ifi203-ps	14.2452122888584	0.188509109244137	0.327829865312325	0.575021159419209	0.565276986756432	0.999803489356147	ENSMUSG00000090222
Mndal	11557.1519229395	-0.0178703632533513	0.1176736247403	-0.151863795245453	0.879294364236124	0.999803489356147	ENSMUSG00000090272
Ifi211	2193.94529375874	-0.212898411418477	0.187751569572424	-1.133936786272	0.2568210650592	0.999803489356147	ENSMUSG00000026536
Ifi203	3737.76551410827	0.327416249278062	0.23115682242793	1.41642477102377	0.156651175602518	0.999803489356147	ENSMUSG00000039997
Ifi205	759.992140280714	-0.265577515919137	0.234900416216975	-1.13059619134019	0.258225091295257	0.999803489356147	ENSMUSG00000054203
ENSMUSG00000047048	0.79814827370167	-1.21813994083191	2.07252613079723	-0.587756131385102	0.556695993228613	0.999803489356147	ENSMUSG00000047048
ENSMUSG00000046486	0.799548097229953	-1.21402043083013	1.74677495812989	-0.695006775303138	0.487051055557393	0.999803489356147	ENSMUSG00000046486
ENSMUSG00000026532	0.933318286252891	-0.416986574578738	1.16990141102154	-0.356428815838963	0.721519452582502	0.999803489356147	ENSMUSG00000026532
ENSMUSG00000066672	1.62436252998107	0.230212159980442	1.21526884473802	0.189433112662466	0.849753374118279	0.999803489356147	ENSMUSG00000066672
ENSMUSG00000066671	1.05450782707569	-2.26786771565244	2.52901330142759	-0.896740129588193	0.36985760183163	0.999803489356147	ENSMUSG00000066671
Fmn2	13.0955634748395	-0.0477632806561772	0.32376979402139	-0.147522349330159	0.882719740502586	0.999803489356147	ENSMUSG00000028354
Rgs7	3.00067037686963	0.0731943474906101	1.14806507008591	0.0637545287264361	0.949165685375877	0.999803489356147	ENSMUSG00000026527
Fh1	2904.22345193341	-0.112998755821862	0.108257640775378	-1.0437947382977	0.296580366517316	0.999803489356147	ENSMUSG00000026526
Kmo	1114.79633734245	0.0244181179460898	0.143343863696671	0.170346447461196	0.864737685219986	0.999803489356147	ENSMUSG00000039783
Opn3	43.5924107380024	-0.296492105462237	0.250055824614596	-1.18570365605045	0.235739350220111	0.999803489356147	ENSMUSG00000026525
Chml	407.2862835946	0.00268459356128647	0.112033450806527	0.0239624285600428	0.980882577760986	0.999803489356147	ENSMUSG00000078185
Exo1	1441.77851634687	-0.0845177706637235	0.0606967558304416	-1.39245944049838	0.16378331559179	0.999803489356147	ENSMUSG00000039748
ENSMUSG00000094820	1.14414907882406	0.627696817914264	1.79987344605053	0.348744973871147	0.727280777174816	0.999803489356147	ENSMUSG00000094820
Rbm8a2	468.344929864909	0.629109579842637	0.302862053914478	2.07721492907885	0.0377817265809372	0.999803489356147	ENSMUSG00000078184
Cep170	1065.79144306531	0.142066970884222	0.245092958589067	0.579645256648997	0.5621538670905	0.999803489356147	ENSMUSG00000057335
Gm38104	13.9784854774915	-0.153201902521108	0.887733337549308	-0.17257648895336	0.862984333682988	0.999803489356147	ENSMUSG00000104154
Sdccag8	586.859495548129	0.070187230466687	0.0657825058092504	1.06695890652462	0.285990392725123	0.999803489356147	ENSMUSG00000026504
Gm38158	4.14462024998707	0.160886893321501	0.950946706725958	0.169186025024918	0.865650321746528	0.999803489356147	ENSMUSG00000103367
ENSMUSG00000103584	1.56327622038723	0.787288996771215	0.880873083574078	0.893759851960566	0.371450394324678	0.999803489356147	ENSMUSG00000103584
Gm37519	2.08920672109622	2.32575573431817	1.93749227123964	1.20039484484246	0.229986030045984	0.999803489356147	ENSMUSG00000103251
Akt3	494.621197024978	0.147116040577246	0.308405651971235	0.477021220710208	0.63334701073297	0.999803489356147	ENSMUSG00000019699
ENSMUSG00000104391	1.01694329837703	2.36412008431379	1.4541752583685	1.62574632645463	0.104003630581346	0.999803489356147	ENSMUSG00000104391
ENSMUSG00000102749	1.30984695198155	3.84397322923244	1.93464534941113	1.98691363789362	0.046931968049253	0.999803489356147	ENSMUSG00000102749
ENSMUSG00000097892	8.15560593022267	0.153852358771483	0.42560669541752	0.361489517030633	0.717733540142208	0.999803489356147	ENSMUSG00000097892
Zbtb18	2551.50420638762	-0.115268802316073	0.171586512192531	-0.671782419510541	0.501722222397834	0.999803489356147	ENSMUSG00000063659
ENSMUSG00000102432	1.72381169004468	0.220073066279892	1.22906593257166	0.179057168901767	0.857892812678695	0.999803489356147	ENSMUSG00000102432
ENSMUSG00000101746	5.35478691381144	-0.323143052020096	0.583130079833318	-0.554152603673718	0.579474412019463	0.999803489356147	ENSMUSG00000101746
Adss	6154.46841509205	-0.138707698764394	0.154029886143476	-0.900524581542511	0.367841149774878	0.999803489356147	ENSMUSG00000015961
Gm16585	1.11834829094548	-1.39794796561226	1.51186083665842	-0.92465386477109	0.355145984665385	0.999803489356147	ENSMUSG00000089657
Catspere2	3.62054899417424	-0.78566293626065	0.890107883468809	-0.882660350337388	0.377419810803597	0.999803489356147	ENSMUSG00000091476
ENSMUSG00000104097	0.957280251900184	-0.0503135994019297	1.21333267855015	-0.0414672746324206	0.966923381463567	0.999803489356147	ENSMUSG00000104097
Gm8010	3.46650434832028	-0.190570608056451	0.624347350753362	-0.30523170768083	0.760189684703107	0.999803489356147	ENSMUSG00000102493
Desi2	714.942812237823	0.0909994363797596	0.22149373601209	0.410844288503004	0.681186715719099	0.999803489356147	ENSMUSG00000026502
Gm37486	28.607572387632	0.0342690080898891	0.327263578645874	0.104713785236001	0.91660292306536	0.999803489356147	ENSMUSG00000104126
B230369F24Rik	11.7878062010359	-0.992707941669828	0.588574548353058	-1.68663076656578	0.0916743721792228	0.999803489356147	ENSMUSG00000086350
Cox20	17.0304717187745	0.0434563024833454	0.311586088431313	0.139468044616906	0.88908030581968	0.999803489356147	ENSMUSG00000026500
Hnrnpu	68588.8051884537	-0.0228125525916854	0.144279686850372	-0.158113405217906	0.874367437648968	0.999803489356147	ENSMUSG00000039630
ENSMUSG00000104279	5.4175976993258	0.027687129201622	0.612750894774802	0.0451849673949437	0.963959876293256	0.999803489356147	ENSMUSG00000104279
Efcab2	500.197661986582	0.212734706759148	0.267852145874588	0.794224388475695	0.427064812912294	0.999803489356147	ENSMUSG00000026495
Smyd3	407.584507796454	0.00350681924580044	0.150242899592818	0.0233409981789786	0.981378268794625	0.999803489356147	ENSMUSG00000055067
Gm5561	666.524907137529	0.620370119493699	0.596880831210888	1.03935339695054	0.298640409574186	0.999803489356147	ENSMUSG00000096474
Tfb2m	970.753362173673	-0.125440589803665	0.153850510701908	-0.815340743630752	0.414877292902874	0.999803489356147	ENSMUSG00000026492
Cnst	375.876627008567	-0.0017790392804621	0.251123197747021	-0.00708432871364709	0.994347570776184	0.999803489356147	ENSMUSG00000038949
Sccpdh	135.526959126639	0.139424346361542	0.191727972775842	0.727198772004696	0.467104198368594	0.999803489356147	ENSMUSG00000038936
Ahctf1	4670.04866651941	-0.0257008645743397	0.0634899551047309	-0.404802059348513	0.685623014929667	0.999803489356147	ENSMUSG00000026491
Gm10518	1.54422439415576	-0.651164474315246	1.07984337470976	-0.603017520471678	0.546497033819849	0.999803489356147	ENSMUSG00000073486
Gm37070	41.8930791507092	0.402605600130962	0.49628363047454	0.81124094249491	0.417227317703651	0.999803489356147	ENSMUSG00000104418
Cdc42bpa	39.5158284948864	0.339497332987757	0.317276482449415	1.07003623579912	0.284602998574866	0.999803489356147	ENSMUSG00000026490
Gm38331	1.37011904855763	-1.04409680273759	1.13717028315404	-0.918153435949536	0.358538542584559	0.999803489356147	ENSMUSG00000103636
Coq8a	332.783299244627	0.148531815613194	0.113659601620733	1.30681274168834	0.191276316703413	0.999803489356147	ENSMUSG00000026489
ENSMUSG00000104520	0.876618330965408	-1.75837470337554	1.36455621422028	-1.28860554446289	0.197535254898958	0.999803489356147	ENSMUSG00000104520
Psen2	899.883942528974	0.208599572646358	0.290833313952381	0.71724786205377	0.473221171654629	0.999803489356147	ENSMUSG00000010609
Gm31728	2.25734797923843	0.0277883173332914	1.05074885273608	0.026446202878007	0.978901442454756	0.999803489356147	ENSMUSG00000102923
Gm5069	11.9622316891085	0.635335029192682	0.444491432587928	1.42935269976661	0.152902886128273	0.999803489356147	ENSMUSG00000055676
Itpkb	874.239167889859	0.195834034100564	0.230820930696081	0.848424072764944	0.396201840880611	0.999803489356147	ENSMUSG00000038855
Gm37390	1.40502872375117	2.2480226246248	2.20489104259582	1.01956177479782	0.307936341590891	0.999803489356147	ENSMUSG00000103123
Gm37267	0.762365887997207	-1.72725860535175	1.63171344823504	-1.05855510795726	0.289802440864521	0.999803489356147	ENSMUSG00000102608
Parp1	8891.18944370995	0.112267803401252	0.27032551035429	0.415305988895064	0.677917917593925	0.999803489356147	ENSMUSG00000026496
Lin9	809.34955752169	-0.202142608788566	0.120970085673575	-1.67101319026942	0.0947190724883312	0.999803489356147	ENSMUSG00000058729
ENSMUSG00000026497	1.49015911590128	1.73660969888048	1.50161879467667	1.15649171749639	0.24748008544654	0.999803489356147	ENSMUSG00000026497
Gm8101	15.5862787662642	0.653313017977402	0.527542270078067	1.23840885372223	0.215564499400694	0.999803489356147	ENSMUSG00000104202
Acbd3	1760.68595944823	0.0832798241437694	0.149879229615154	0.555646198326529	0.578452742938737	0.999803489356147	ENSMUSG00000026499
Gm37768	10.8500045863228	0.229214996937236	0.559158903282377	0.409928189628561	0.681858625774912	0.999803489356147	ENSMUSG00000103649
Gm38293	3.74965949384162	0.444453727140105	0.732165320929653	0.607040123910496	0.543824284643598	0.999803489356147	ENSMUSG00000103156
H3f3a	26373.2308629615	-0.0978726192202245	0.211092257884191	-0.463648549696783	0.642899564607526	0.999803489356147	ENSMUSG00000060743
H3f3aos	3.33913162785365	1.11118562233655	0.663503526876501	1.6747245151319	0.093988295176759	0.999803489356147	ENSMUSG00000073485
Sde2	1480.20350690324	0.211449689038335	0.261184837323726	0.809578730545729	0.418182336526565	0.999803489356147	ENSMUSG00000038806
Gm20305	31.6047828030481	0.201001314134187	0.354060907843139	0.567702645735849	0.570236894750516	0.999803489356147	ENSMUSG00000103979
Pycr2	1059.85801465978	0.00600241260551042	0.293692040690931	0.0204377775829039	0.983694147983925	0.999803489356147	ENSMUSG00000026520
Lefty1	4.37477010888314	0.455471452113511	0.710203055613975	0.641325672303329	0.521311113064615	0.999803489356147	ENSMUSG00000038793
Tmem63a	187.538653098003	0.125232790025007	0.122548593850652	1.02190311687807	0.306826757116922	0.999803489356147	ENSMUSG00000026519
Ephx1	103.869287848661	0.131109519035301	0.256460148203045	0.511227650588031	0.60919165913966	0.999803489356147	ENSMUSG00000038776
Nvl	2525.27091532058	-0.00554378331164472	0.138810350984443	-0.0399378236012531	0.968142696272755	0.999803489356147	ENSMUSG00000026516
Cnih4	1230.13008118655	0.0571858891817311	0.219709706487392	0.26027930261248	0.794648336676536	0.999803489356147	ENSMUSG00000062169
Wdr26	7941.38127228424	-0.0307817164946692	0.0608217699492906	-0.506097019543053	0.612788542765633	0.999803489356147	ENSMUSG00000038733
ENSMUSG00000054135	6.44598531850207	-0.0178355177394659	0.500706992730505	-0.0356206683717427	0.971584827801107	0.999803489356147	ENSMUSG00000054135
Rpl35a-ps2	1986.45259711531	0.268612419013021	0.405967045839719	0.661660648975612	0.508188729334778	0.999803489356147	ENSMUSG00000081214
Gm8146	3.72960287544759	0.0593293423180797	0.572608162163639	0.103612463528113	0.917476896438128	0.999803489356147	ENSMUSG00000103260
ENSMUSG00000026514	0.771898434204066	-0.133227546211826	2.07697578929858	-0.0641449683228222	0.948854796004321	0.999803489356147	ENSMUSG00000026514
ENSMUSG00000089927	1.36216814685321	-1.40544634875229	2.5731430163091	-0.546198302948686	0.584929632564948	0.999803489356147	ENSMUSG00000089927
Dnah14	24.3433769954049	0.14065364435242	0.303888617113313	0.462846044345166	0.643474724525787	0.999803489356147	ENSMUSG00000047369
Lbr	3342.25698248105	0.0164500602791788	0.306447246159138	0.0536799089740762	0.957190190034956	0.999803489356147	ENSMUSG00000004880
Enah	26.9584052485303	-0.209103251557374	0.321355870265248	-0.650690623403829	0.515246217220773	0.999803489356147	ENSMUSG00000022995
2700078F05Rik	3.37962014494853	-0.81839405865052	1.05982511277895	-0.772197269891651	0.439997598268509	0.999803489356147	ENSMUSG00000103722
Srp9	6771.10610376607	0.131303721779474	0.334502304891867	0.392534580058932	0.694663266112124	0.999803489356147	ENSMUSG00000026511
Degs1	784.731272823956	-0.0863429803792305	0.0950964581572867	-0.907951589915386	0.363903798994283	0.999803489356147	ENSMUSG00000038633
Fbxo28	441.496492353557	-0.0802627805290128	0.140200500623639	-0.572485691363358	0.566992976850766	0.999803489356147	ENSMUSG00000047539
Gm10517	1.88736574030189	-2.25214876053051	1.18761171624112	-1.89636792036603	0.0579114107449328	0.999803489356147	ENSMUSG00000073482
Trp53bp2	474.833254007148	0.0571388228797255	0.150623259658132	0.379349265242387	0.704428520305493	0.999803489356147	ENSMUSG00000026510
Capn2	689.406247592212	-0.122878937097939	0.151302985901165	-0.812138216348266	0.416712326529021	0.999803489356147	ENSMUSG00000026509
Disp1	148.355488001802	0.0988509235148552	0.24056514246428	0.410911250492299	0.68113761255322	0.999803489356147	ENSMUSG00000030768
BC085271	501.883585887469	0.198733319422462	0.168851393041686	1.17697174919604	0.239206782321767	0.999803489356147	ENSMUSG00000102478
Brox	806.081053310418	0.00539220457811617	0.154721493339734	0.0348510375754717	0.972198523226075	0.999803489356147	ENSMUSG00000046836
Aida	2608.54869778526	-0.0238135870598618	0.130148339118524	-0.182972654289312	0.85481947508961	0.999803489356147	ENSMUSG00000042901
Mia3	2642.05368884146	0.174717781039462	0.313007870528889	0.558189737351467	0.576714828009543	0.999803489356147	ENSMUSG00000056050
ENSMUSG00000103415	0.981686704428792	0.603144788264925	1.19209961069724	0.505951669518754	0.612890578503407	0.999803489356147	ENSMUSG00000103415
Taf1a	517.407936339165	-0.0212073447104969	0.0778917349764254	-0.272266944842293	0.785416770651035	0.999803489356147	ENSMUSG00000072258
Gm37986	2.05707343249008	0.278134745913679	0.994545725009785	0.279660088942559	0.779738301334664	0.999803489356147	ENSMUSG00000104212
Dusp10	845.044360991738	-0.107898311277665	0.17255047435465	-0.625314486565232	0.531764673952608	0.999803489356147	ENSMUSG00000039384
1700056E22Rik	104.602590579568	-0.0101843052547147	0.313530157844139	-0.0324826974372828	0.974087114193346	0.999803489356147	ENSMUSG00000044854
ENSMUSG00000101574	2.54362212895237	0.0638252114119995	0.730147472948928	0.0874141372484952	0.930342332494624	0.999803489356147	ENSMUSG00000101574
ENSMUSG00000103308	1.13946614351568	-0.15641967075908	1.18759239592724	-0.131711579912022	0.895212425874243	0.999803489356147	ENSMUSG00000103308
Rpl21-ps1	3.0254504780629	-0.104014893297823	0.814647825688608	-0.127680808832825	0.898401578104087	0.999803489356147	ENSMUSG00000102606
Hlx	406.908198718693	0.0269777794245489	0.161259535647435	0.167294165372837	0.867138594803858	0.999803489356147	ENSMUSG00000039377
Mtarc2	2042.14700276392	0.00420286984609822	0.257268990302824	0.0163364805107337	0.986965954180859	0.999803489356147	ENSMUSG00000073481
Rab3gap2	1264.91652175142	0.0555398526469098	0.123775413139271	0.4487147425993	0.653637448262914	0.999803489356147	ENSMUSG00000039318
ENSMUSG00000103613	2.11096692373375	-0.548889814748299	0.965136928764426	-0.56871703733375	0.569548183769392	0.999803489356147	ENSMUSG00000103613
Iars2	2855.74654657521	-0.00812507856012885	0.072392761675292	-0.112236062999956	0.910636235665162	0.999803489356147	ENSMUSG00000026618
2010103J01Rik	0.779614131874597	-0.630249279333248	1.46596417915067	-0.429921336617102	0.667252864043062	0.999803489356147	ENSMUSG00000104368
Gm37785	1.79807003359501	-0.177774745041995	0.988419229658042	-0.179857635007262	0.857264335113355	0.999803489356147	ENSMUSG00000102526
Bpnt1	856.199231933264	-0.21457997584163	0.143004697100949	-1.50050998457873	0.133482349105865	0.999803489356147	ENSMUSG00000026617
4930532G15Rik	9.03679188221389	-0.281290748820122	0.466622602421924	-0.602822810897139	0.546626570148288	0.999803489356147	ENSMUSG00000097261
Eprs	17231.9360890193	0.19923903985171	0.114488326569419	1.74025637217174	0.0818140110587786	0.999803489356147	ENSMUSG00000026615
Gm9722	180.411369750479	0.140084197037412	0.150652856232022	0.929847601572629	0.352449996058565	0.999803489356147	ENSMUSG00000102546
Lyplal1	13.696847144143	0.484983779560027	0.444943290099075	1.08999009615818	0.275717506745128	0.999803489356147	ENSMUSG00000039246
ENSMUSG00000039239	2.63506318597396	0.241765634992638	0.738104469558168	0.327549344251173	0.743252428023353	0.999803489356147	ENSMUSG00000039239
Rrp15	5311.12361570815	-0.0775809319551833	0.223029216484706	-0.347850981938518	0.72795209966218	0.999803489356147	ENSMUSG00000001305
A430105J06Rik	5.53748370209338	0.603158913518922	0.47230575305582	1.2770518030248	0.201583958996071	0.999803489356147	ENSMUSG00000097784
Gm3809	1.25152320168832	0.807062983809167	1.83713668896099	0.439304809848205	0.660440689503234	0.999803489356147	ENSMUSG00000097935
ENSMUSG00000107163	2.19810343871655	-1.17176341693575	1.63821191812648	-0.715269742559207	0.474442381293998	0.999803489356147	ENSMUSG00000107163
Gpatch2	674.67251839914	0.108918952118032	0.137391240565138	0.792764892943759	0.427914814205574	0.999803489356147	ENSMUSG00000039210
Gm38155	21.2363806321864	0.117022423371421	0.567192031090508	0.206318877834776	0.836541833366961	0.999803489356147	ENSMUSG00000104245
Kctd3	728.104241318666	0.00799955897304258	0.166718476232598	0.0479824381425005	0.961730238816418	0.999803489356147	ENSMUSG00000026608
Pdcd5-ps	399.061193357283	0.0350082152364143	0.311598611683691	0.112350356913502	0.910545615470814	0.999803489356147	ENSMUSG00000102824
Cenpf	3205.89971278077	0.227170899283813	0.219908978641799	1.03302239265929	0.301593419526869	0.999803489356147	ENSMUSG00000026605
Ptpn14	7.05178025320567	0.401065390002083	0.489426399861143	0.819460066142469	0.412523976866793	0.999803489356147	ENSMUSG00000026604
Gm37422	37.2980340666131	-0.0267988811278956	0.225895264907705	-0.118634098589207	0.905565249342728	0.999803489356147	ENSMUSG00000104435
Smyd2	476.50257311184	-0.0893449939008638	0.110693526934589	-0.807138379045953	0.419586762797108	0.999803489356147	ENSMUSG00000026603
Prox1	3.36854487934037	-1.51943498710507	1.9338064302207	-0.785722378082928	0.432030150031155	0.999803489356147	ENSMUSG00000010175
Rps6kc1	170.279458458471	0.114101880787508	0.17064010132627	0.668669790399041	0.503706142330763	0.999803489356147	ENSMUSG00000089872
Angel2	1113.95967799714	0.0263799476506052	0.0941534930962396	0.28018023318201	0.779339231212846	0.999803489356147	ENSMUSG00000026634
Vash2	7.69705306513542	0.53295652143538	0.501598827108573	1.06251548574698	0.288001731654089	0.999803489356147	ENSMUSG00000037568
Flvcr1	568.782108649993	-0.0968622147679813	0.176825622614936	-0.547783818518842	0.583840350744259	0.999803489356147	ENSMUSG00000066595
A230020J21Rik	1.16379144880568	-1.17940088212332	1.29047733455276	-0.913926072581562	0.360755692597815	0.999803489356147	ENSMUSG00000097845
Tatdn3	75.8563569586376	0.171357730174305	0.183650338815427	0.933065145861364	0.350786333508294	0.999803489356147	ENSMUSG00000026632
Nsl1	628.894170620057	-0.0224360146486009	0.132747346924276	-0.169012904351295	0.86578649121727	0.999803489356147	ENSMUSG00000062510
ENSMUSG00000103576	2.12132904581218	0.699289927552531	0.836729149634885	0.83574228035162	0.403299904068666	0.999803489356147	ENSMUSG00000103576
Batf3	488.723920420038	0.645126851003297	0.356976868033667	1.80719511198819	0.0707318628125135	0.999803489356147	ENSMUSG00000026630
Atf3	1284.01346047627	0.0918039046986876	0.164854419630738	0.556878638160395	0.577610350695314	0.999803489356147	ENSMUSG00000026628
D730003I15Rik	95.7335287594651	0.253439268097437	0.329513456792772	0.769131769501065	0.441815090039985	0.999803489356147	ENSMUSG00000073478
ENSMUSG00000103685	2.03556780334068	-1.28027100280305	1.03536530051752	-1.23654038063968	0.216257765462773	0.999803489356147	ENSMUSG00000103685
Nenf	384.152035409432	0.441357273455882	0.452790360991179	0.974749710858974	0.32968442789626	0.999803489356147	ENSMUSG00000037499
Pacc1	453.33343583448	-0.0957496137983138	0.106761009202546	-0.896859391958898	0.369793951177385	0.999803489356147	ENSMUSG00000026627
Ppp2r5a	5397.62583645838	0.00284708777687261	0.117188757622512	0.0242948883035662	0.980617390471978	0.999803489356147	ENSMUSG00000026626
Gm32200	1.8108117275282	2.72032767616104	1.46226084555878	1.86035732572836	0.0628349880336146	0.999803489356147	ENSMUSG00000103114
9430037O13Rik	10.8647971278346	-0.455472013196927	0.384548435587199	-1.1844334056422	0.23624154311317	0.999803489356147	ENSMUSG00000102246
Dtl	1507.52001679459	-0.0646482259272984	0.0789262779436581	-0.819096346763595	0.412731446065546	0.999803489356147	ENSMUSG00000037474
Ints7	1822.59406864798	-0.089041662994242	0.106373768158902	-0.837064104575399	0.402556535835949	0.999803489356147	ENSMUSG00000037461
Gm37349	3.47017264151326	0.73109276342536	0.694751660110948	1.05230804818604	0.292658240370656	0.999803489356147	ENSMUSG00000102970
Lpgat1	2923.6516306653	-0.110135017170595	0.227612387424384	-0.483870928190069	0.628477473657819	0.999803489356147	ENSMUSG00000026623
ENSMUSG00000064845	0.924019660414656	-2.05454610001693	1.520960849941	-1.35082116025315	0.17675272802173	0.999803489356147	ENSMUSG00000064845
Gm38037	54.9425513835948	-0.147830848604069	0.348527288071255	-0.424158605835896	0.671450147011985	0.999803489356147	ENSMUSG00000102840
Nek2	3025.71753363981	-0.175448859293801	0.212392859138486	-0.826058182960868	0.40877108746448	0.999803489356147	ENSMUSG00000026622
1700034H15Rik	4.7578884319392	0.327102876905095	0.599494764560523	0.545630914967017	0.585319669171839	0.999803489356147	ENSMUSG00000055833
Slc30a1	268.390893705158	-0.0374733270673342	0.133181370134439	-0.281370637871551	0.778426136353326	0.999803489356147	ENSMUSG00000037434
ENSMUSG00000049353	2.19150171022185	0.7066127431008	0.875074219631127	0.807488927509098	0.419384851204002	0.999803489356147	ENSMUSG00000049353
Gm26670	5.07695114176322	0.585767101197725	1.13228735451846	0.517330780795339	0.604925270411562	0.999803489356147	ENSMUSG00000097416
Traf5	518.28406132177	-0.0930915873461537	0.0938892771315077	-0.991503930909632	0.321439573857933	0.999803489356147	ENSMUSG00000026637
Gstp-ps	119.255800047487	0.137206702732436	0.45844574564156	0.29928667467603	0.764721320972954	0.999803489356147	ENSMUSG00000103653
Rcor3	132.102153530791	0.219670862839062	0.167437558110914	1.31195691885059	0.189534670873912	0.999803489356147	ENSMUSG00000037395
Gm10516	5.39505547008893	0.491944897082756	0.490366315193034	1.00321918908541	0.315755116413642	0.999803489356147	ENSMUSG00000097316
Hhat	21.9390066734382	-0.126939204493233	0.265284613519564	-0.478501948564279	0.632292987733351	0.999803489356147	ENSMUSG00000037375
ENSMUSG00000016262	1.6708471327359	-1.51986957999743	0.95847019832903	-1.58572439982707	0.11280184167981	0.999803489356147	ENSMUSG00000016262
ENSMUSG00000016200	2.67691170851438	-0.069217310654507	0.854355742763525	-0.081016966574854	0.935428459483838	0.999803489356147	ENSMUSG00000016200
Utp25	720.848600283769	0.127445980425083	0.25194118028297	0.505856090226856	0.612957679269687	0.999803489356147	ENSMUSG00000016181
Irf6	6.1509602444366	0.423370071457581	0.541130745403716	0.782380367505679	0.433991068138314	0.999803489356147	ENSMUSG00000026638
A130010J15Rik	359.385342513546	-0.101182509435211	0.133720134968558	-0.756673701077274	0.449245374414148	0.999803489356147	ENSMUSG00000079144
Traf3ip3	3140.04683086177	0.0864971445914245	0.0947713999238572	0.91269248592845	0.361404296947644	0.999803489356147	ENSMUSG00000037318
ENSMUSG00000090080	1.64073717115935	1.19161047270317	1.17671012686155	1.01266271573727	0.311221292469387	0.999803489356147	ENSMUSG00000090080
4930570N18Rik	13.7698966626699	-0.300908203565491	0.518074122076059	-0.580820756612341	0.561361264241722	0.999803489356147	ENSMUSG00000089683
Lamb3	116.425007907443	0.0480719269320609	0.138659490516028	0.346690491600387	0.728823854308807	0.999803489356147	ENSMUSG00000026639
Hsd11b1	29.6266029045037	-0.116802765104904	0.263795233125739	-0.442778149251958	0.657926209699947	0.999803489356147	ENSMUSG00000016194
Gm38118	1.58978220637579	-0.152040565775926	1.1872765623168	-0.128058255844991	0.898102870994536	0.999803489356147	ENSMUSG00000103089
Gm37691	65.6658850344054	0.144667913709792	0.172116443689115	0.84052348868594	0.400614937431993	0.999803489356147	ENSMUSG00000104348
Camk1g	1.2109520024537	-1.40720267653693	1.11089919813218	-1.26672400061404	0.205253995090911	0.999803489356147	ENSMUSG00000016179
Plxna2	3.61867146357067	-0.0288934372383457	0.63285699732991	-0.0456555546675634	0.963584789079475	0.999803489356147	ENSMUSG00000026640
A330023F24Rik	2.5786256272902	-0.155780206076808	0.997022944655472	-0.156245357152376	0.875839625895643	0.999803489356147	ENSMUSG00000096929
Cd46	25.7937873489826	0.0543025139288141	0.311005641612248	0.174602986773201	0.861391601534271	0.999803489356147	ENSMUSG00000016493
ENSMUSG00000104010	1.93210607355761	1.38543792289196	1.79810274810713	0.770499864009671	0.441003435666803	0.999803489356147	ENSMUSG00000104010
Cr1l	1552.96602557492	-0.12000146653278	0.073942894869651	-1.62289381210084	0.104612106582824	0.999803489356147	ENSMUSG00000016481
Cr2	314.059019584221	-0.100306002056156	0.119513308873455	-0.839287297805161	0.40130810942474	0.999803489356147	ENSMUSG00000026616
Fam171a1	7.65761027421553	0.804832835201761	0.462120775515256	1.74160712490017	0.081577213778443	0.999803489356147	ENSMUSG00000050530
Nmt2	1459.75324915782	0.185284801999912	0.290123138182189	0.638641933769371	0.523055895089769	0.999803489356147	ENSMUSG00000026643
Rpp38	473.302434102413	-0.201903293049692	0.166594810517455	-1.21194227132625	0.225534479485544	0.999803489356147	ENSMUSG00000049950
ENSMUSG00000103786	1.00410296869791	-1.65156632968445	1.78071498075548	-0.92747371001718	0.35368063552203	0.999803489356147	ENSMUSG00000103786
Dclre1c	242.592083368959	0.0796491971202188	0.193686718958267	0.411226941881238	0.680906134547322	0.999803489356147	ENSMUSG00000026648
Suv39h2	671.311874829881	-0.0498047884884204	0.107225797256576	-0.4644851310291	0.64230021004126	0.999803489356147	ENSMUSG00000026646
Gm13184	1.66302767435294	-0.257198240313129	0.935091172918877	-0.275051511298399	0.783276663598943	0.999803489356147	ENSMUSG00000085043
ENSMUSG00000109865	2808.96416661037	-0.0277066131674463	0.0730651467900001	-0.379204236009806	0.7045362061936	0.999803489356147	ENSMUSG00000109865
Gm45902	234.875477215035	0.178684607903737	0.133701131019727	1.33644799068583	0.181402889230317	0.999803489356147	ENSMUSG00000051396
Cdnf	19.3830974287969	0.117242097309998	0.287659413053868	0.407572608402849	0.683587477615861	0.999803489356147	ENSMUSG00000039496
Gm13182	5.97078938031571	0.955655923690611	0.691666008519056	1.38167252968928	0.167072272746663	0.999803489356147	ENSMUSG00000082580
Fam107b	5158.33963768249	0.0884389080878941	0.0737987182307976	1.19838000182213	0.230769114219658	0.999803489356147	ENSMUSG00000026655
Gm13183	3.92091507961116	-0.18290205780155	0.674812403563452	-0.27104133954223	0.786359237482235	0.999803489356147	ENSMUSG00000080703
Gm13181	2.41804102673582	-0.367280774185561	0.894361378864038	-0.410662605592449	0.681319950436724	0.999803489356147	ENSMUSG00000081070
Frmd4a	25.4030794770443	0.223248544543308	0.232513493564563	0.96015306948763	0.336978182453236	0.999803489356147	ENSMUSG00000026657
ENSMUSG00000104284	2.17458652003782	-0.442632879305934	2.09405377931906	-0.211376080059351	0.832593820408678	0.999803489356147	ENSMUSG00000104284
Prpf18	1929.7833497589	0.0353011903163549	0.0936719656696291	0.376859715326764	0.706277860383024	0.999803489356147	ENSMUSG00000039449
Gm13196	26.7871352781687	0.529665218128287	0.390580813401983	1.35609635689698	0.175068511870519	0.999803489356147	ENSMUSG00000083378
ENSMUSG00000048186	2.24834788049363	-0.899826140610501	0.899453432747278	-1.00041437149457	0.317110017868668	0.999803489356147	ENSMUSG00000048186
Sephs1	2016.96291241749	-0.109246393064824	0.0934587001963334	-1.16892694671897	0.242433065649617	0.999803489356147	ENSMUSG00000026662
Phyh	573.826437476532	-0.0880572860744146	0.206275386516415	-0.426891872857585	0.669458085311687	0.999803489356147	ENSMUSG00000026664
Gm13194	1.37830418684044	0.577626894921606	1.07173083764642	0.538966384684899	0.589910049606441	0.999803489356147	ENSMUSG00000086670
Gm13193	0.753618279913016	1.91739366028662	1.30305502647779	1.47146023868954	0.141166692899348	0.999803489356147	ENSMUSG00000082795
Gm13192	204.432104401844	0.2136996069363	0.366132199988558	0.5836678853785	0.559443777700287	0.999803489356147	ENSMUSG00000069188
Mcm10	2839.75749145293	-0.0231797205892201	0.18187560084248	-0.127448214504021	0.898585657681646	0.999803489356147	ENSMUSG00000026669
Optn	855.669608657044	0.194113837987488	0.108573755987379	1.78785228734328	0.0737998424104158	0.999803489356147	ENSMUSG00000026672
4930551O13Rik	0.791983796033576	1.96020025841721	1.2818457323123	1.52920137658159	0.126214529452026	0.999803489356147	ENSMUSG00000086430
Camk1d	197.901428389416	0.141384624726378	0.210366508609742	0.672087138113157	0.501528224134312	0.999803489356147	ENSMUSG00000039145
Gm13216	11.4602050795534	0.90779722657521	0.544387499364793	1.66755707585948	0.0954036852334901	0.999803489356147	ENSMUSG00000082013
Cdc123	2745.41817320012	-0.0312952687854404	0.211786844447996	-0.147767765590014	0.882526049348343	0.999803489356147	ENSMUSG00000039128
Nudt5	1623.38452799544	-0.151308809736242	0.134841210447091	-1.12212586370702	0.2618089284521	0.999803489356147	ENSMUSG00000025817
Gm13199	18.965072982982	-0.196981753459409	0.265493886593337	-0.741944592348109	0.458120906669629	0.999803489356147	ENSMUSG00000056718
Sec61a2	119.782962586752	0.110293071671382	0.192400925981705	0.573246054345233	0.566478105582944	0.999803489356147	ENSMUSG00000025816
Dhtkd1	7.536455761507	-0.37855123747198	0.422858576353274	-0.89521948623249	0.370669770066809	0.999803489356147	ENSMUSG00000025815
Upf2	3114.94748608529	0.116677068999703	0.184504441301857	0.632380815206582	0.527138066982351	0.999803489356147	ENSMUSG00000043241
Proser2	2.36831270074073	-0.441462202077572	0.98074335448508	-0.450130199770105	0.652616562271034	0.999803489356147	ENSMUSG00000045319
Gm13384	0.806165303506628	-0.492641405597337	1.50245056203927	-0.327891924063497	0.742993380147052	0.999803489356147	ENSMUSG00000082332
Echdc3	5.25280039382933	-0.710811946645099	0.684058212598081	-1.03911031773949	0.298753432940912	0.999803489356147	ENSMUSG00000039063
A230108P19Rik	1.12054942434654	1.17081554328623	1.41303813504185	0.828580286866468	0.407341946639704	0.999803489356147	ENSMUSG00000087125
Gm13383	1.09258344044991	-0.415045507446474	1.32869789422085	-0.312370110054141	0.754759263394287	0.999803489356147	ENSMUSG00000087485
ENSMUSG00000118578	0.949916708950071	0.0823371158451426	1.29345688669594	0.0636566372579051	0.949243633134987	0.999803489356147	ENSMUSG00000118578
Usp6nl	891.245596057136	0.169273458668449	0.121289266991072	1.39561778933753	0.162829622550268	0.999803489356147	ENSMUSG00000039046
Celf2	3343.54807981915	0.128747846518125	0.262189370178317	0.491049070488872	0.623391741505259	0.999803489356147	ENSMUSG00000002107
Gm13217	67.5285277262997	0.442923545505776	0.387084023012623	1.14425685167412	0.252517131939334	0.999803489356147	ENSMUSG00000082953
ENSMUSG00000079603	0.890324514266826	-2.59125791342207	2.52074613742916	-1.02797258119171	0.303962725531727	0.999803489356147	ENSMUSG00000079603
Gata3	2.69283933423496	-0.310666586289761	0.924009155414644	-0.336215917850242	0.736708050204196	0.999803489356147	ENSMUSG00000015619
Taf3	2633.96679304866	0.33911652985104	0.330016403015268	1.02757477129205	0.30414989669972	0.999803489356147	ENSMUSG00000025782
C630004M23Rik	2.80251226327848	-0.222195265397419	0.662497993538927	-0.335390095614476	0.737330838303811	0.999803489356147	ENSMUSG00000103570
Atp5c1	12131.27911391	-0.0924572167738787	0.108847727809556	-0.849417977154705	0.395648753391473	0.999803489356147	ENSMUSG00000025781
Kin	1771.75949163395	-0.0258552638674967	0.231353948860799	-0.111756311032552	0.911016629187018	0.999803489356147	ENSMUSG00000037262
Itih5	23.8845567500657	0.113511072363048	0.254946056437397	0.445235646902118	0.656149468323064	0.999803489356147	ENSMUSG00000025780
ENSMUSG00000086748	2.02192234221026	0.668195461541851	1.1823723862248	0.565131145928849	0.571984565186101	0.999803489356147	ENSMUSG00000086748
Sfmbt2	44.9224196617716	0.400437544036897	0.260043077105835	1.53988926947639	0.123587346852014	0.999803489356147	ENSMUSG00000061186
Gm13294	2.80088449908704	-0.414085507785717	1.01358412228487	-0.408535906079769	0.682880275180575	0.999803489356147	ENSMUSG00000083900
Prkcq	17.3356882206961	0.149994793877899	0.457456317510514	0.327888780057019	0.742995757411751	0.999803489356147	ENSMUSG00000026778
ENSMUSG00000102992	2.23327232532439	-0.477812642262776	2.62066422647113	-0.182325014183972	0.85532766919977	0.999803489356147	ENSMUSG00000102992
Gm38171	1.39047070362638	-0.3303625666975	1.03914278710134	-0.317918356166468	0.750546868222634	0.999803489356147	ENSMUSG00000102196
Gm13292	1618.53839075173	-0.000463788160995028	0.152105654639285	-0.00304911847028233	0.99756715921824	0.999803489356147	ENSMUSG00000082424
Pfkfb3	875.203140914734	0.106327299104159	0.260676429058714	0.407889963385259	0.683354461595344	0.999803489356147	ENSMUSG00000026773
ENSMUSG00000102376	1.01572645955127	1.10617761379344	1.52954224620127	0.723208277862684	0.469551933901484	0.999803489356147	ENSMUSG00000102376
Rbm17	16357.6815095589	0.011285309879265	0.147607980242809	0.0764546053722918	0.939057427883721	0.999803489356147	ENSMUSG00000037197
Il2ra	2016.94162115378	0.188164174938392	0.128379490775898	1.46568718882718	0.142733525908514	0.999803489356147	ENSMUSG00000026770
ENSMUSG00000104101	9.29319402945232	0.36535367447398	0.411563909325023	0.88772039091856	0.374691174604548	0.999803489356147	ENSMUSG00000104101
Il15ra	65.7096328169775	-0.203913258369694	0.167659511697197	-1.21623435679554	0.223895659384665	0.999803489356147	ENSMUSG00000023206
Fbh1	629.782839906636	-0.0160962619189297	0.139474237719386	-0.115406702930432	0.908122766293288	0.999803489356147	ENSMUSG00000058594
Ankrd16	516.542165823567	-0.0654091379026591	0.167654209894475	-0.390143128191228	0.696430712972902	0.999803489356147	ENSMUSG00000047909
Gm13310	7.33814712025912	-0.0317501555546369	0.455655777951085	-0.0696801337566828	0.944448254307256	0.999803489356147	ENSMUSG00000080801
Mindy3	1013.6018872782	-0.231717417065844	0.0935400642503433	-2.47719967826507	0.0132417796512994	0.999803489356147	ENSMUSG00000026767
Gm37289	2.14383389106444	-0.413225857533612	0.950456667043179	-0.434765594121335	0.66373258098706	0.999803489356147	ENSMUSG00000102630
Pter	77.2009851849315	-0.170274358414943	0.143899250783496	-1.18328870711864	0.236694746839776	0.999803489356147	ENSMUSG00000026730
Rsu1	422.543844442682	-0.00345682742684618	0.201538981795142	-0.0171521528790888	0.986315233037946	0.999803489356147	ENSMUSG00000026727
Gm37780	4.72130889606661	0.388871171210856	0.54552506055192	0.712838326469231	0.475945806213744	0.999803489356147	ENSMUSG00000102691
Gm13270	6.94866555180354	0.440316800823662	0.561221702650767	0.784568377780036	0.432706676588197	0.999803489356147	ENSMUSG00000086358
Cubn	0.84807863350079	1.49445435934791	1.47211370139786	1.01517590518235	0.310021984003307	0.999803489356147	ENSMUSG00000026726
Trdmt1	204.939567629825	0.0183003280129448	0.1295594207817	0.141250461776761	0.887672082918504	0.999803489356147	ENSMUSG00000026723
Vim	10003.3164069189	0.035842336756723	0.168656051340406	0.212517348010127	0.831703445115511	0.999803489356147	ENSMUSG00000026728
St8sia6	700.366743320511	0.114367128605051	0.242541719297748	0.471535902920901	0.637258087126218	0.999803489356147	ENSMUSG00000003418
Hacd1	55.3079082303392	-0.0355269275365356	0.335925063253253	-0.105758490278982	0.91577397197994	0.999803489356147	ENSMUSG00000063275
Stamos	12.3440263391073	0.224575289091631	0.446602643413779	0.502852574662352	0.615067926640944	0.999803489356147	ENSMUSG00000086657
Stam	275.66406305398	0.0383850926830905	0.170395613119746	0.225270427919499	0.821768903543399	0.999803489356147	ENSMUSG00000026718
ENSMUSG00000103901	5.532978265869	-1.27047471639289	0.848097099542623	-1.49802978583237	0.134125511885331	0.999803489356147	ENSMUSG00000103901
Gm13320	13.2689537277576	-0.159320645930581	0.422339510686594	-0.377233580802266	0.706000026721023	0.999803489356147	ENSMUSG00000083545
Mrc1	16.4607263656635	0.180147478664392	0.317186880766221	0.567953750890372	0.570066372462804	0.999803489356147	ENSMUSG00000026712
Gm37697	1.45792733031083	0.190988022208984	1.31303747686047	0.145455118817815	0.88435154881373	0.999803489356147	ENSMUSG00000103475
ENSMUSG00000057914	12.6638592283987	0.13510038849705	0.428140300072578	0.315551674238908	0.752342823100859	0.999803489356147	ENSMUSG00000057914
Gm13268	281.413257182442	0.643134889956012	0.38004636704161	1.6922537504104	0.0905976020125825	0.999803489356147	ENSMUSG00000070271
Gm13311	1.23103617417461	-1.0183313151064	1.02524352801174	-0.993257979478551	0.320584249700814	0.999803489356147	ENSMUSG00000082542
Gm13316	47.9097958748528	0.0467576190173444	0.312545522102535	0.14960258813756	0.881078166128011	0.999803489356147	ENSMUSG00000085281
Nsun6	157.629609665261	0.0757662643532795	0.100299707047991	0.755398660506827	0.450009816709327	0.999803489356147	ENSMUSG00000026707
ENSMUSG00000103778	1.02966439745753	0.451885240567191	1.22611795124014	0.368549567445886	0.712463492480024	0.999803489356147	ENSMUSG00000103778
Arl5b	149.519274479938	-0.076890941107238	0.152805106442512	-0.503196148985805	0.614826372085827	0.999803489356147	ENSMUSG00000017418
Gm38257	1.38503520888383	0.111623100009346	1.83047562612025	0.0609803804085248	0.951374834138114	0.999803489356147	ENSMUSG00000102258
Gm13313	4.71720356935287	-0.026602471655371	0.564805306693627	-0.0471002509007963	0.962433327371263	0.999803489356147	ENSMUSG00000083860
Gm37416	182.586658673065	0.126181397853263	0.716346519025978	0.176145754187279	0.86017943620072	0.999803489356147	ENSMUSG00000103865
Nebl	70.5001124285685	-0.0218573769094152	0.269851934709798	-0.080997666119833	0.935443808574416	0.999803489356147	ENSMUSG00000053702
A930004D18Rik	10.6831595875008	0.0133617462865852	0.390212048506092	0.0342422699087328	0.972683959777251	0.999803489356147	ENSMUSG00000054057
Skida1	18.3600779150108	0.131980427599393	0.297704037782193	0.443327637013619	0.657528768417523	0.999803489356147	ENSMUSG00000054074
1810059C17Rik	4.60903031877564	0.102205263356824	0.670378287663172	0.152459089498699	0.878824855029805	0.999803489356147	ENSMUSG00000086340
Mllt10	1075.12373155102	0.0343778589993344	0.111564819415191	0.308142469817448	0.757973926183069	0.999803489356147	ENSMUSG00000026743
ENSMUSG00000092814	1.43776900431691	2.1631557374772	2.57687241125863	0.839450074449223	0.401216794181564	0.999803489356147	ENSMUSG00000092814
ENSMUSG00000081619	7.49642818627013	1.31402942453737	0.605054454895195	2.17175398661428	0.0298742240498365	0.999803489356147	ENSMUSG00000081619
Dnajc1	992.716738053568	0.260833004214544	0.215001725895515	1.21316702518612	0.225065968541427	0.999803489356147	ENSMUSG00000026740
Commd3	1877.10762582089	-0.040258814749074	0.192709230098138	-0.208909634108195	0.834518783170726	0.999803489356147	ENSMUSG00000051154
Bmi1	3001.18445819669	-0.124556359275169	0.157948053672419	-0.788590656099482	0.430351293910022	0.999803489356147	ENSMUSG00000026739
Gm13333	1.05211926159689	-0.379398797174006	1.06095759275174	-0.357600341206837	0.720642422928577	0.999803489356147	ENSMUSG00000081139
Pip4k2a	1361.75547755797	-0.0140402960385403	0.168311181829383	-0.083418676560497	0.933518638520458	0.999803489356147	ENSMUSG00000026737
4930426L09Rik	3.3416070300926	0.348964401717245	0.746821108061834	0.467266388095115	0.640309301096041	0.999803489356147	ENSMUSG00000026736
Armc3	7.76378925404892	0.449237370167918	0.62014484924057	0.724407161839777	0.468815804297839	0.999803489356147	ENSMUSG00000037683
Msrb2	90.2059482313763	-0.0442289247795451	0.30837488261579	-0.1434258341807	0.88595388116791	0.999803489356147	ENSMUSG00000023094
Otud1	207.756727302946	-0.282136382602549	0.196669328365164	-1.43457236035654	0.151408995502795	0.999803489356147	ENSMUSG00000043415
Etl4	6.18231245906273	0.52569324067201	0.785919337457263	0.66888956107483	0.503565929689169	0.999803489356147	ENSMUSG00000036617
Gm13363	15.0344249485039	0.63920673777974	0.51802012615763	1.23394189820577	0.217224555489831	0.999803489356147	ENSMUSG00000060795
Gm13328	180.295848580586	0.192477957043987	0.175996355155983	1.09364740464879	0.274109649877156	0.999803489356147	ENSMUSG00000081128
Arhgap21	749.607053612515	0.0526749828632084	0.386868699232375	0.136157262057453	0.891696960388776	0.999803489356147	ENSMUSG00000036591
Gm13375	39.3109511126133	-0.160915882046823	0.286661693414827	-0.56134421076611	0.574562908138264	0.999803489356147	ENSMUSG00000075514
Enkur	0.848385543121563	0.883052673420677	1.31436907069803	0.671845293005646	0.501682190907131	0.999803489356147	ENSMUSG00000026679
Thnsl1	70.2551103080969	0.272532711902213	0.140046504778101	1.94601580620688	0.0516528409713615	0.999803489356147	ENSMUSG00000048550
Gm13378	34.229881560175	0.539038510065984	0.743525250238909	0.724976737364039	0.46846630176134	0.999803489356147	ENSMUSG00000084071
Gm13379	1.2302953559233	-1.95127984921785	1.14678188897969	-1.7015265657482	0.0888441536987722	0.999803489356147	ENSMUSG00000080846
Gm13337	0.984787419771291	0.354899566034649	1.24251303324344	0.285630457419207	0.775161173219111	0.999803489356147	ENSMUSG00000081467
ENSMUSG00000025716	1.06750574329894	1.62415233146661	2.5004971085813	0.649531777458483	0.515994713507405	0.999803489356147	ENSMUSG00000025716
Gm13342	11.4232145019905	0.703845347508194	0.453982276781977	1.55038067234112	0.121050174742069	0.999803489356147	ENSMUSG00000082516
Gm13341	1736.43910628527	0.244185632298092	0.279342081659958	0.874145530981393	0.382039004629735	0.999803489356147	ENSMUSG00000083863
Gm13340	4479.46029020404	0.470413829495551	0.413267844300543	1.13827832477924	0.255004281855302	0.999803489356147	ENSMUSG00000083563
Gm13339	102.891708853067	0.344626370652355	0.381893427092436	0.902415035723931	0.366836436884632	0.999803489356147	ENSMUSG00000082884
Apbb1ip	1884.6864564432	0.0137719035162046	0.307602977567708	0.0447716846732186	0.964289294810206	0.999803489356147	ENSMUSG00000026786
A130006I12Rik	1.79811062476698	0.283540740553201	0.869721910015824	0.326013105209735	0.744414439835407	0.999803489356147	ENSMUSG00000069136
Pdss1	557.081835387625	-0.199521367993944	0.143906684002316	-1.38646352236658	0.16560541136714	0.999803489356147	ENSMUSG00000026784
Gm14441	2.97001263239917	1.0419496033886	0.980962381000438	1.0621708065155	0.28815815035447	0.999803489356147	ENSMUSG00000081861
Abi1	1647.50488773028	0.055834797496504	0.123611050938684	0.451697458054946	0.651486949715578	0.999803489356147	ENSMUSG00000058835
Acbd5	639.997150353096	0.0936782702023622	0.12291023344668	0.762168190356589	0.445959628577605	0.999803489356147	ENSMUSG00000026781
Mastl	514.343098855593	0.146566078930544	0.166247333480393	0.881614615177151	0.377985248880284	0.999803489356147	ENSMUSG00000026779
Yme1l1	5983.8010037761	-0.0929066330065416	0.0734893964099002	-1.26421820759472	0.206151717397487	0.999803489356147	ENSMUSG00000026775
ENSMUSG00000026774	1.48326740285138	-1.03170877575643	1.18969711870477	-0.867202886798327	0.385830854834421	0.999803489356147	ENSMUSG00000026774
Gm13422	17.4111299448483	0.19243716284533	0.324140120206022	0.593685109769868	0.552722744073243	0.999803489356147	ENSMUSG00000084098
Gm38309	8.39974500761573	-0.155092613509207	0.4842075900372	-0.320301905009981	0.748739479182072	0.999803489356147	ENSMUSG00000102704
Spopl	495.999145518109	-0.0669746273975571	0.084306892692332	-0.794414611412297	0.426954100755887	0.999803489356147	ENSMUSG00000026771
Gm13392	17.3938391830985	0.485269058789531	0.542515130401489	0.894480230312483	0.371065002754895	0.999803489356147	ENSMUSG00000083373
Gm13410	4.68838368045285	0.986580404573566	0.889941661393312	1.1085899754698	0.267607104606416	0.999803489356147	ENSMUSG00000083116
ENSMUSG00000026983	1.47444353590102	-3.34959678688501	2.47090164559476	-1.35561720672162	0.175220994230295	0.999803489356147	ENSMUSG00000026983
Il1rn	15.0835206652306	-0.128512147171048	0.406295367648452	-0.316302270229778	0.751773088154789	0.999803489356147	ENSMUSG00000026981
Psd4	1590.20743838984	0.105804932914912	0.192112005756936	0.550746073875144	0.581807755698399	0.999803489356147	ENSMUSG00000026979
Gm13418	2.19439727143046	0.0385799387893136	0.821116217817245	0.0469847482636135	0.962525383226122	0.999803489356147	ENSMUSG00000082307
Gm13416	1.35420957117231	1.54174437273507	1.13425986857796	1.35925145149319	0.174066922348009	0.999803489356147	ENSMUSG00000084241
ENSMUSG00000004113	38.6931481548293	0.33845565882155	0.196939183967775	1.71857957366641	0.085690953673694	0.999803489356147	ENSMUSG00000004113
Ehmt1	1247.7395590999	0.127608583551721	0.101927850094447	1.25195011406086	0.210588042235594	0.999803489356147	ENSMUSG00000036893
Arrdc1	350.964565261937	-0.0127930334903952	0.114836743727113	-0.111401917846045	0.911297639307859	0.999803489356147	ENSMUSG00000026972
Zmynd19	2365.94966174365	-0.0715740507359746	0.142073955892768	-0.503780233936724	0.614415819142472	0.999803489356147	ENSMUSG00000026974
Dph7	277.087088320132	-0.164545144078901	0.130835229744524	-1.25765166156088	0.208517761082636	0.999803489356147	ENSMUSG00000026975
Mrpl41	1291.96181367863	-0.0270732596976146	0.301670475756532	-0.0897444790701508	0.928490269338291	0.999803489356147	ENSMUSG00000036850
Pnpla7	243.450464027106	-0.0627830748930195	0.113781845686191	-0.551784641164764	0.581095911329083	0.999803489356147	ENSMUSG00000036833
Gm13370	5966.44558699534	0.211075167349381	0.389761011996115	0.54155023425351	0.588128382865245	0.999803489356147	ENSMUSG00000084383
Gm13369	19.7851879191383	0.501096851085157	0.302827371023915	1.65472773940762	0.0979797375640698	0.999803489356147	ENSMUSG00000083796
Nsmf	130.655737034839	-0.0137947791356284	0.215574893630052	-0.0639906572761742	0.948977665975691	0.999803489356147	ENSMUSG00000006476
Noxa1	0.967257483375669	-0.326926545945101	1.37106590786776	-0.238446995194803	0.811534421447055	0.999803489356147	ENSMUSG00000036805
ENSMUSG00000087028	1.60129593986593	0.338621916158211	1.77428941940645	0.190849312662581	0.848643652760538	0.999803489356147	ENSMUSG00000087028
Nrarp	4.92208331428889	0.0459108297155537	0.567839354669287	0.0808517925677984	0.935559818343645	0.999803489356147	ENSMUSG00000078202
Tor4a	402.810449429405	0.0815859400310822	0.0955395760883607	0.853949152502274	0.39313316348935	0.999803489356147	ENSMUSG00000059555
Nelfb	1454.8420667966	-0.0494757068284074	0.197713476649422	-0.250239425591286	0.802402197692218	0.999803489356147	ENSMUSG00000013465
ENSMUSG00000064919	7.14230512560065	0.640091547535146	0.442624584897206	1.44612741672223	0.148141467140164	0.999803489356147	ENSMUSG00000064919
Fam166a	1.02352439011732	-1.02269658167142	1.25247587994998	-0.816539941441637	0.414191389073593	0.999803489356147	ENSMUSG00000026969
Tubb4b	18670.3464772092	-0.0640082194044297	0.203072287030025	-0.31519918517964	0.752610424189415	0.999803489356147	ENSMUSG00000036752
ENSMUSG00000036731	1.09518317720913	2.97749645478594	1.40462949153811	2.11977355788358	0.0340251462445135	0.999803489356147	ENSMUSG00000036731
Rnf208	3.11914364527945	0.234650406285098	0.699940878506208	0.335243180518163	0.737441651389197	0.999803489356147	ENSMUSG00000044628
Ndor1	100.951609616872	0.33948807984025	0.387614615592409	0.875839212929045	0.381117449225597	0.999803489356147	ENSMUSG00000006471
Tmem203	52.5315444961828	0.00534156082380542	0.259783832678102	0.0205615598505091	0.983595404773691	0.999803489356147	ENSMUSG00000078201
Tprn	286.799702230524	-0.0533460126436169	0.175946604423122	-0.303194328862004	0.761741770651125	0.999803489356147	ENSMUSG00000048707
Ssna1	721.547403128765	0.0253994057290059	0.265330412178458	0.0957274574010103	0.923737033185496	0.999803489356147	ENSMUSG00000026966
Anapc2	2472.77258860574	-0.0156391874254385	0.0738863808424736	-0.211665360342678	0.832368114199747	0.999803489356147	ENSMUSG00000026965
Grin1	3.25303281590184	-0.237727880041091	0.87550529371577	-0.271532201743909	0.785981736254038	0.999803489356147	ENSMUSG00000026959
Man1b1	974.71718855095	0.00578800907683118	0.193289980115918	0.0299446928048729	0.976111162111965	0.999803489356147	ENSMUSG00000036646
Gm25220	2.52169797274923	2.3203105600829	1.46515308231204	1.58366425194384	0.113270143924076	0.999803489356147	ENSMUSG00000088171
Dpp7	135.968740090929	0.119518845064892	0.202970095490674	0.58884952867544	0.555962217516103	0.999803489356147	ENSMUSG00000026958
Uap1l1	283.56253777623	-0.117166142206844	0.171268251072802	-0.684108942976474	0.49390637513551	0.999803489356147	ENSMUSG00000026956
Sapcd2	483.333776532793	-0.0926530998320284	0.13071151602969	-0.708836548196587	0.478425914484007	0.999803489356147	ENSMUSG00000026955
Npdc1	2.58379113179214	1.18010368882228	0.974718652814694	1.21071212232833	0.226005754804945	0.999803489356147	ENSMUSG00000015094
Fut7	0.790239257702165	-0.177541816355066	1.48945712939913	-0.119199010733991	0.905117690382444	0.999803489356147	ENSMUSG00000036587
Abca2	239.184524065433	0.247231314536353	0.269455465692627	0.917521987913114	0.358869176333626	0.999803489356147	ENSMUSG00000026944
Paxx	218.060676955364	0.159172020028758	0.237211494326566	0.671013099431125	0.502212184609517	0.999803489356147	ENSMUSG00000047617
Clic3	10.7501341259059	0.681821149044105	0.504948950753244	1.3502773855199	0.176927023508037	0.999803489356147	ENSMUSG00000015093
C8g	11.8985964593599	0.765395619898999	0.433182771659864	1.76691149780996	0.0772430511475289	0.999803489356147	ENSMUSG00000015083
Fbxw5	382.71667255572	-0.12492899995506	0.238990387785317	-0.522736504646716	0.601157631096527	0.999803489356147	ENSMUSG00000015095
Traf2	945.131922702075	0.126006055168025	0.189840238056313	0.663747877995429	0.506851690380096	0.999803489356147	ENSMUSG00000026942
Gm13433	1.11933587793008	-0.0764954431234495	1.28186217038996	-0.0596752481588395	0.952414285700757	0.999803489356147	ENSMUSG00000083043
Edf1	5252.75295925178	0.142774095413686	0.360373998380621	0.396183121022207	0.691969942218423	0.999803489356147	ENSMUSG00000015092
Mamdc4	56.1392062261487	-0.193969740329501	0.21639331203869	-0.896375856083853	0.37005205775067	0.999803489356147	ENSMUSG00000026941
Phpt1	22.1633037981278	0.186677115961208	0.367801060905145	0.507549150352646	0.611769559059618	0.999803489356147	ENSMUSG00000036504
ENSMUSG00000029419	4.18192436597281	0.261087409211132	0.519581685196317	0.502495404764862	0.6153190839935	0.999803489356147	ENSMUSG00000029419
Rabl6	4000.33571735153	0.458163471504689	0.294825143704062	1.55401763142896	0.120180211016017	0.999803489356147	ENSMUSG00000015087
ENSMUSG00000026940	2.14160333005175	0.396159471470057	0.922354540212576	0.429508886440516	0.667552928262784	0.999803489356147	ENSMUSG00000026940
Tmem141	5.14259443568484	0.754265380719518	0.595864665463111	1.26583337532407	0.205572743338449	0.999803489356147	ENSMUSG00000026939
A230005M16Rik	1.75936230272232	0.602648024676692	0.992128168019292	0.60742960849487	0.543565844054393	0.999803489356147	ENSMUSG00000087612
Bmyc	86.3575633809728	0.0179975869398614	0.319519929129399	0.0563269621049922	0.955081340272663	0.999803489356147	ENSMUSG00000049086
Camsap1	657.473956839502	0.172757136539139	0.192854855956653	0.89578836727849	0.37036580391346	0.999803489356147	ENSMUSG00000026933
Ubac1	1193.1009815049	-0.0512359876057126	0.0825332208198526	-0.620792295475137	0.534736293162726	0.999803489356147	ENSMUSG00000036352
Nacc2	8.6659398690091	0.315277978633534	0.403575934537681	0.781211047667406	0.434678377077958	0.999803489356147	ENSMUSG00000026932
Tmem250-ps	356.157894439473	-0.0321110784315379	0.131824650520925	-0.243589331013936	0.807548892062077	0.999803489356147	ENSMUSG00000087679
1810012K08Rik	10.9246745438616	-0.0233565531042759	0.51759108724703	-0.045125493231549	0.964007281455903	0.999803489356147	ENSMUSG00000087595
Qsox2	189.454201796505	0.157934639648571	0.180554121726423	0.874721873632297	0.381725255455633	0.999803489356147	ENSMUSG00000036327
Gpsm1	178.745710935979	0.139585525797766	0.118365246013906	1.17927795952341	0.238287511700609	0.999803489356147	ENSMUSG00000026930
Dnlz	681.561229651918	0.0622091423771804	0.213655062710174	0.291166245199478	0.770924177101838	0.999803489356147	ENSMUSG00000075467
Card9	6.57876438318002	0.0883644449476459	0.574867385232008	0.153712747005091	0.877836233580574	0.999803489356147	ENSMUSG00000026928
Gm13562	9.92244144923601	0.728674572034516	0.543255205421601	1.34131171641332	0.179819267351105	0.999803489356147	ENSMUSG00000086779
Snapc4	699.486448883671	0.172979285966975	0.301250297320946	0.574204531930092	0.565829402934924	0.999803489356147	ENSMUSG00000036281
Gm13563	14.8673419280965	-0.156371629087673	0.517529298549358	-0.30215029279692	0.762537494860498	0.999803489356147	ENSMUSG00000085767
Entr1	723.80296558032	-0.0719534625281977	0.10580081168116	-0.680084220384202	0.496451135281548	0.999803489356147	ENSMUSG00000026927
Pmpca	2082.94586069288	-0.093942528549143	0.214404213957176	-0.438156166874157	0.661273081004265	0.999803489356147	ENSMUSG00000026926
Inpp5e	149.737317673706	0.123109888388184	0.251202521586834	0.490082215777551	0.624075722088406	0.999803489356147	ENSMUSG00000026925
Sec16a	1353.74438336072	0.142494457156056	0.221898764300939	0.642159759676739	0.520769457703172	0.999803489356147	ENSMUSG00000026924
0610009E02Rik	1.36197396723547	0.0885899849770598	0.908169546226033	0.097547848136069	0.922291338061965	0.999803489356147	ENSMUSG00000086714
Notch1	365.022871253482	0.234880498326053	0.409788234304926	0.573175310229325	0.566525999704315	0.999803489356147	ENSMUSG00000026923
Egfl7	79.5470500370161	0.207690612246877	0.273147904171014	0.760359530772181	0.447039706584537	0.999803489356147	ENSMUSG00000026921
Agpat2	71.0337754570544	0.0471807380980517	0.190072995903739	0.24822430915934	0.803960858822826	0.999803489356147	ENSMUSG00000026922
Dipk1b	0.932136839317106	0.711965748957406	1.41654529103652	0.502607119915273	0.615240522467143	0.999803489356147	ENSMUSG00000036186
ENSMUSG00000097052	1.92228271669661	-2.0023053828066	1.25307307120269	-1.59791589877899	0.110061695266608	0.999803489356147	ENSMUSG00000097052
Snora17	36.8188983799496	-0.288740472996296	0.241830997886783	-1.19397627069907	0.232487250409536	0.999803489356147	ENSMUSG00000077192
Surf6	3041.50521499629	-0.0149828273741647	0.195620838842472	-0.0765911620807942	0.938948789938936	0.999803489356147	ENSMUSG00000036160
Med22	459.214464479783	-0.0516144654218778	0.114905213105359	-0.449191677444187	0.653293390680046	0.999803489356147	ENSMUSG00000015776
Rpl7a	42851.3156411783	-0.0522139821983453	0.223896255356808	-0.233206143243153	0.815601335738269	0.999803489356147	ENSMUSG00000062647
Gm23969	11.0436816259186	0.651468776562157	0.554218505472238	1.17547279661305	0.239805614345399	0.999803489356147	ENSMUSG00000065258
Surf1	830.582086614642	-0.124040789046379	0.212847275632369	-0.582768976853726	0.560048831895593	0.999803489356147	ENSMUSG00000015790
Surf2	1761.59363688362	-0.133213958898097	0.0965919573227969	-1.37914131352484	0.167851188130238	0.999803489356147	ENSMUSG00000014873
Surf4	3594.64388103045	0.060431550848864	0.143612001854437	0.420797357243976	0.673903061606377	0.999803489356147	ENSMUSG00000014867
Stkld1	7.42661951993589	-0.300963478514561	0.436373453526641	-0.689692455125909	0.490387611556471	0.999803489356147	ENSMUSG00000049897
Rexo4	2838.47288458631	0.119131094659694	0.183482108483322	0.649279080366155	0.516158004925921	0.999803489356147	ENSMUSG00000052406
Adamts13	5.20835285452435	0.341410193646636	0.591580180244906	0.577115672646938	0.563861317641468	0.999803489356147	ENSMUSG00000014852
Cacfd1	211.8842775401	0.113477478663069	0.139384146826157	0.814134758127128	0.415567755761727	0.999803489356147	ENSMUSG00000015488
Slc2a6	1083.61468846156	0.174809001222932	0.133138927154777	1.31298189762121	0.189189048116078	0.999803489356147	ENSMUSG00000036067
Gm13398	3.78527105570807	-0.21511833004117	0.709727077287142	-0.303100074557445	0.761813597333732	0.999803489356147	ENSMUSG00000087364
Adamtsl2	1.0356986600177	1.85337791180451	1.52754107430941	1.21330806940325	0.225012058895989	0.999803489356147	ENSMUSG00000036040
ENSMUSG00000009614	0.827093974151487	0.351939317454653	1.13565969845669	0.309898570789227	0.756638089686632	0.999803489356147	ENSMUSG00000009614
Vav2	2181.09461425143	0.0610559001747414	0.198776138554606	0.30715910178509	0.758722273767464	0.999803489356147	ENSMUSG00000009621
ENSMUSG00000109946	21.5047070821707	0.395908005797711	0.284352578799689	1.39231375171247	0.163827409038684	0.999803489356147	ENSMUSG00000109946
Brd3	2722.66310258402	0.17320609573687	0.256659202863258	0.674848568859423	0.499771979268636	0.999803489356147	ENSMUSG00000026918
Wdr5	2388.04358898327	0.00778476634600233	0.135193292162408	0.0575824896449039	0.954081197766234	0.999803489356147	ENSMUSG00000026917
ENSMUSG00000080538	1.43465269118122	1.24372504774256	1.36002021413772	0.914490119200988	0.360459367448007	0.999803489356147	ENSMUSG00000080538
Gm13421	10.7975204563048	0.434711390384246	0.380761520431054	1.14168939627123	0.253583149973555	0.999803489356147	ENSMUSG00000085929
Rxra	259.86419151524	-0.0623181406304055	0.177770840833632	-0.350553219741624	0.725923557126888	0.999803489356147	ENSMUSG00000015846
Col5a1	1.33904174344465	1.01085988315529	1.08581762875949	0.930966542061183	0.351870871544358	0.999803489356147	ENSMUSG00000026837
Olfm1	12.9972032533615	0.350058023510826	0.379013593568378	0.923602819136544	0.355693145524573	0.999803489356147	ENSMUSG00000026833
Ppp1r26	20.3034150583128	0.433084273686561	0.277534374386546	1.56047075121357	0.118648676651354	0.999803489356147	ENSMUSG00000035829
Mrps2	1377.2731384233	-0.0655117245231437	0.0933716879821459	-0.701623007347479	0.482914299583718	0.999803489356147	ENSMUSG00000035772
Ralgds	333.411759964494	0.144422142564572	0.189159398882353	0.763494404284901	0.445168598245208	0.999803489356147	ENSMUSG00000026821
Gm13381	2.24895461647599	0.0160192108237168	0.996985687575087	0.0160676437218266	0.987180426751355	0.999803489356147	ENSMUSG00000087667
Gtf3c5	898.777262008392	-0.0249469096135675	0.105077913433509	-0.237413446826324	0.812336058849529	0.999803489356147	ENSMUSG00000026816
Gfi1b	12.4388036604604	0.175301061102861	0.383810412388563	0.456738679943339	0.647858885359989	0.999803489356147	ENSMUSG00000026815
Tsc1	561.180726570776	0.0968585889040977	0.162859169951254	0.594738318592002	0.552018403758548	0.999803489356147	ENSMUSG00000026812
Ak8	4.61419994928592	0.844848571334732	0.670577206204013	1.25988262577136	0.207711707225966	0.999803489356147	ENSMUSG00000026807
Gtf3c4	728.738844393972	0.055844447087245	0.20511752430294	0.272255855646775	0.785425296620781	0.999803489356147	ENSMUSG00000035666
Ddx31	981.706187013547	-0.0614274977004854	0.139767014929434	-0.43949924616691	0.660299828124933	0.999803489356147	ENSMUSG00000026806
ENSMUSG00000026805	1.45807289348472	2.30646378065241	1.21805967466733	1.89355565135373	0.058284014795945	0.999803489356147	ENSMUSG00000026805
Cfap77	4.43468511026118	-0.330398522218324	0.715097758092043	-0.462032664037239	0.64405789662059	0.999803489356147	ENSMUSG00000079502
Gm13394	14638.3784743429	0.212913510035323	0.192838728219448	1.10410140121351	0.269549153522567	0.999803489356147	ENSMUSG00000083773
Ttf1	707.860424559322	0.207917266566311	0.181505916505071	1.14551233684166	0.251996987955506	0.999803489356147	ENSMUSG00000026803
Setx	1931.98641783193	0.1766125602658	0.180803890554273	0.976818362284001	0.328659083753489	0.999803489356147	ENSMUSG00000043535
Ntng2	52.7156376104899	-0.0283481405319141	0.207818997533851	-0.136407839842922	0.891498876311931	0.999803489356147	ENSMUSG00000035513
6530402F18Rik	233.982645967258	0.187048120959476	0.184753862311525	1.01241791981638	0.311338273827219	0.999803489356147	ENSMUSG00000079499
Med27	371.236370287367	-0.097946224599962	0.0833239764923868	-1.17548668130248	0.239800062562649	0.999803489356147	ENSMUSG00000026799
Rapgef1	3564.08487118109	0.121732141154978	0.190148939060117	0.640193638506135	0.522046718044387	0.999803489356147	ENSMUSG00000039844
ENSMUSG00000079497	1.14661992159739	1.79441545291593	1.82418362207937	0.9836813746143	0.325272200416614	0.999803489356147	ENSMUSG00000079497
Trub2	1268.57141621804	0.217858209952253	0.364096827887539	0.598352397674677	0.549604821184625	0.999803489356147	ENSMUSG00000039826
Coq4	186.545585999508	-0.104367754331955	0.214267051998932	-0.487091941380121	0.626193176995471	0.999803489356147	ENSMUSG00000026798
Slc27a4	85.1408666851555	-0.0653308478765693	0.205069897635702	-0.318578439009254	0.750046205354704	0.999803489356147	ENSMUSG00000059316
Urm1	598.056769216944	-0.090292589871237	0.132381102004227	-0.682065555462393	0.49519749949638	0.999803489356147	ENSMUSG00000069020
2600006K01Rik	1.34194483992591	1.04875533187815	1.17276343083357	0.89425992003581	0.371182839085458	0.999803489356147	ENSMUSG00000039798
Cercam	35.997383807631	0.256228666528274	0.249113649019987	1.02856133148978	0.303685856569684	0.999803489356147	ENSMUSG00000039787
Odf2	3383.42663880112	0.158395029931325	0.264296563732348	0.599307942920253	0.548967552125084	0.999803489356147	ENSMUSG00000026790
Gle1	1495.62208697018	0.0625826869872913	0.0756639714229266	0.827113430743451	0.408172772406539	0.999803489356147	ENSMUSG00000019715
Sptan1	3960.05269669048	0.273132991595147	0.343565983972811	0.79499427864419	0.426616830260443	0.999803489356147	ENSMUSG00000057738
Wdr34	205.873392898053	-0.0448086357181363	0.109782464591962	-0.408158405667793	0.683157382981243	0.999803489356147	ENSMUSG00000039715
Set	67955.7857459391	-0.089723589823619	0.141204033571214	-0.635418036966827	0.525155807435855	0.999803489356147	ENSMUSG00000054766
Pkn3	33.4372779642569	0.14238312526146	0.221528724420814	0.642729856517343	0.520399404341539	0.999803489356147	ENSMUSG00000026785
Zdhhc12	365.530434951383	-0.118270268649441	0.252374674038013	-0.468629703436989	0.63933434185729	0.999803489356147	ENSMUSG00000015335
Zer1	165.357694853388	0.124174759859199	0.24055897723321	0.516192583155265	0.605719909919432	0.999803489356147	ENSMUSG00000039686
Tbc1d13	476.476049275107	0.0799574137567823	0.115378254427622	0.693002456601908	0.488308009841923	0.999803489356147	ENSMUSG00000039678
Slc39a1-ps	30.4209240684987	-0.0873848880449784	0.463082608808525	-0.188702590818111	0.850325920892433	0.999803489356147	ENSMUSG00000085401
Endog	183.293173917853	-0.173976743180018	0.266195064192748	-0.653568629108931	0.513389760810088	0.999803489356147	ENSMUSG00000015337
Spout1	940.077069994037	-0.038907434669505	0.142671990752766	-0.272705486649632	0.785079616778897	0.999803489356147	ENSMUSG00000039660
Kyat1	32.7926379366278	0.218970365239966	0.235050308208819	0.931589355949421	0.351548786032378	0.999803489356147	ENSMUSG00000039648
1700084E18Rik	4.29302084004537	0.56378113975404	0.588725454575402	0.957629970595797	0.338249380776741	0.999803489356147	ENSMUSG00000100747
Lrrc8a	62.3626676766632	-0.377477770211265	0.335772964151594	-1.124205372416	0.26092591084644	0.999803489356147	ENSMUSG00000007476
Phyhd1	0.81807009631338	1.33167804548681	1.77437879202451	0.750503810952009	0.452951329413854	0.999803489356147	ENSMUSG00000079484
Dolk	159.022980412563	-0.0319498813909175	0.274773183023788	-0.116277291107231	0.907432782588842	0.999803489356147	ENSMUSG00000075419
Nup188	865.653102358004	0.16756329737528	0.308367742148272	0.543387892027663	0.586862760464314	0.999803489356147	ENSMUSG00000052533
Sh3glb2	469.165891688326	-0.0876721937930901	0.099091611579181	-0.884758986112906	0.376286634337371	0.999803489356147	ENSMUSG00000026860
Miga2	181.680523190828	0.0331441630589325	0.200181250323811	0.165570766519436	0.868494754649286	0.999803489356147	ENSMUSG00000026858
Dolpp1	277.382783460539	-0.0183033924163883	0.114983644666167	-0.159182573047921	0.873525033484312	0.999803489356147	ENSMUSG00000026856
Crat	216.11889338527	0.101591762386906	0.206411091483934	0.492181702332663	0.62259089841811	0.999803489356147	ENSMUSG00000026853
Ptpa	3202.73815602696	-0.036337376898631	0.0455358269928966	-0.797995321448746	0.424873205125717	0.999803489356147	ENSMUSG00000039515
Ier5l	41.2934492042	0.627766825609816	0.423003842681438	1.48406884824114	0.137790656548467	0.999803489356147	ENSMUSG00000089762
Cstad	1.27462508049536	-0.319304710553449	1.07216038898479	-0.29781431382276	0.765844889158863	0.999803489356147	ENSMUSG00000047363
1700001O22Rik	1.64485224882861	-1.25735100998786	1.02961564794902	-1.22118482998241	0.222016046634494	0.999803489356147	ENSMUSG00000044320
Ntmt1	501.408000121164	0.000888551223773973	0.162940969798959	0.00545320937312631	0.995648989999056	0.999803489356147	ENSMUSG00000026857
Asb6	344.500833172713	-0.00113042413752974	0.105677537591281	-0.0106969197361673	0.99146525565807	0.999803489356147	ENSMUSG00000039483
Ptges	1.71196872910205	-0.0674135280934795	1.61805639811886	-0.0416632746373081	0.966767131118992	0.999803489356147	ENSMUSG00000050737
Tor1b	1069.02076390281	0.00692298681219438	0.069048329212333	0.10026291571669	0.920135598065221	0.999803489356147	ENSMUSG00000026848
Tor1a	873.434652419125	-0.0292269253644994	0.0937007020829135	-0.311917890846081	0.755102925435802	0.999803489356147	ENSMUSG00000026849
BC005624	2936.99261188008	-0.0456995346087125	0.0942576739378197	-0.484836222871994	0.627792525708371	0.999803489356147	ENSMUSG00000026851
Usp20	149.767489869078	0.170940768974756	0.116954552680341	1.46159995534307	0.143850866646286	0.999803489356147	ENSMUSG00000026854
Fnbp1	3068.99962234345	0.135760331058309	0.185968377361842	0.730018366478286	0.465378958078675	0.999803489356147	ENSMUSG00000075415
D330023K18Rik	9.97744566330061	0.886400819287202	0.459792346979909	1.92782856241392	0.0538764537580327	0.999803489356147	ENSMUSG00000087269
Gpr107	478.567336893553	0.168865575784843	0.110227560168659	1.53197236268735	0.125529254926705	0.999803489356147	ENSMUSG00000000194
ENSMUSG00000088891	1.67157182276575	-0.633519170455717	0.906261939456925	-0.699046426726639	0.484523017163987	0.999803489356147	ENSMUSG00000088891
Ncs1	44.4044259514392	0.358247582909337	0.254707799169098	1.40650417489376	0.159574465765962	0.999803489356147	ENSMUSG00000062661
Hmcn2	8.37049138167497	0.0822002947597675	0.389437821490523	0.211074246577172	0.832829335758423	0.999803489356147	ENSMUSG00000055632
Ass1	825.081369848225	-0.145299805167303	0.157659746262628	-0.92160369791072	0.356735328922123	0.999803489356147	ENSMUSG00000076441
Fubp3	679.946128896506	-0.0155772450825325	0.2742539798464	-0.0567986108761549	0.954705620513772	0.999803489356147	ENSMUSG00000026843
Exosc2	2848.07467221241	-0.116493493026609	0.0937636188915273	-1.24241677533135	0.21408282938941	0.999803489356147	ENSMUSG00000039356
Gm13427	5.4240480799205	1.8491863347602	0.929934048150062	1.9885134203214	0.0467549362556206	0.999803489356147	ENSMUSG00000087549
Abl1	553.722819021175	0.163187198373399	0.303830690403213	0.537099126348408	0.591199144250872	0.999803489356147	ENSMUSG00000026842
Qrfp	1.11777101823409	-1.57774891944234	1.18187103142982	-1.33495861856737	0.181889890618692	0.999803489356147	ENSMUSG00000043102
Aif1l	2.33630702163199	0.471781641573185	1.08053681983891	0.436617830055545	0.662388529675062	0.999803489356147	ENSMUSG00000001864
Nup214	1173.50572584772	0.239339661718147	0.306274310144186	0.781455230787955	0.434534797942899	0.999803489356147	ENSMUSG00000001855
Fam78a	315.104193679009	-0.0176222435589287	0.175482634401991	-0.100421580853181	0.920009637323536	0.999803489356147	ENSMUSG00000050592
Prrc2b	1500.40586468241	0.315480585353167	0.316217555302645	0.997669421140227	0.31843968585988	0.999803489356147	ENSMUSG00000039262
Gm13610	1.32967554754377	0.471939382948795	0.980438440223532	0.481355446285028	0.630263896303903	0.999803489356147	ENSMUSG00000086216
Pomt1	182.550954285571	0.121161313617565	0.220190493678973	0.550256787171805	0.582143258850285	0.999803489356147	ENSMUSG00000039254
Uck1	392.856715412916	-0.108191374248586	0.174935318614302	-0.618465013843926	0.536268853221428	0.999803489356147	ENSMUSG00000002550
Gm13611	194.097076835853	0.457886019566412	0.454846567585639	1.00668236763203	0.314087438077485	0.999803489356147	ENSMUSG00000066068
Swi5	4093.05337910184	0.186960205758301	0.217516284535645	0.859522799212135	0.390052146967395	0.999803489356147	ENSMUSG00000044627
Golga2	1911.81435026488	0.195813020504717	0.175402440332595	1.11636428850944	0.26426623324288	0.999803489356147	ENSMUSG00000002546
Ciz1	1008.1123687323	0.116243848913511	0.247252858838708	0.470141576762683	0.63825387132049	0.999803489356147	ENSMUSG00000039205
1110008P14Rik	94.1473918334398	-0.00974744311149105	0.166358819076261	-0.0585928847392375	0.953276378103308	0.999803489356147	ENSMUSG00000039195
Lcn2	1.33366716061743	-0.603692026049791	1.37637802292189	-0.438609172767975	0.660944749397508	0.999803489356147	ENSMUSG00000026822
Ptges2	233.718291001979	-0.00817377147333294	0.117729140267523	-0.0694286177131608	0.944648450233448	0.999803489356147	ENSMUSG00000026820
Gm13413	4.43193205438379	0.855969246646083	0.927997988157197	0.922382653378217	0.356329014697069	0.999803489356147	ENSMUSG00000083004
Slc25a25	363.777930310741	-0.102887724321072	0.0778497300045289	-1.32161953952938	0.186294873511188	0.999803489356147	ENSMUSG00000026819
Naif1	140.914844661235	0.0977129697076367	0.217617145420787	0.449013194795373	0.653422138233647	0.999803489356147	ENSMUSG00000039164
ENSMUSG00000103175	39.7839979192061	0.0989765756296542	0.249295168279915	0.397025647599077	0.691348547616117	0.999803489356147	ENSMUSG00000103175
Fam102a	462.69629077924	0.133463535170216	0.166565776728203	0.801266249236766	0.422977525412257	0.999803489356147	ENSMUSG00000039157
Dpm2	248.654531673007	-0.0314915705053593	0.113166068847869	-0.278277498069619	0.780799348129543	0.999803489356147	ENSMUSG00000026810
Pip5kl1	0.86837846930573	-0.303076590591075	1.75264726902239	-0.172925035144196	0.862710352893432	0.999803489356147	ENSMUSG00000046854
St6galnac4	1759.10620402119	-0.100811863002293	0.12857718563881	-0.784057159918608	0.433006571232141	0.999803489356147	ENSMUSG00000079442
ENSMUSG00000093147	1.58582312138949	0.295901072278379	1.04555430316054	0.283008803448963	0.777170088596024	0.999803489356147	ENSMUSG00000093147
St6galnac6	116.911618399365	0.27168934193809	0.179108494353592	1.51689813997167	0.129292403314604	0.999803489356147	ENSMUSG00000026811
Ak1	3.44542966839039	0.535061243435478	0.586191070275386	0.912776175836511	0.361360270740858	0.999803489356147	ENSMUSG00000026817
Eng	11.4892010906273	0.100768410060221	0.544139762904352	0.185188469819534	0.853081212428174	0.999803489356147	ENSMUSG00000026814
Fpgs	660.668866910447	-0.0747838592798292	0.177332060520973	-0.421716519055416	0.673231945541724	0.999803489356147	ENSMUSG00000009566
Cdk9	2520.79291251494	-0.083458715071113	0.113953417142043	-0.732393263530494	0.463928569281957	0.999803489356147	ENSMUSG00000009555
Sh2d3c	229.473648650881	0.0513174203112242	0.229516693115536	0.223589054088504	0.823077081631764	0.999803489356147	ENSMUSG00000059013
6330409D20Rik	1.75362865565939	0.483661291740063	0.958800563160918	0.504444104773528	0.61394933141994	0.999803489356147	ENSMUSG00000009551
Ttc16	2.24566402773332	0.0273976865154491	0.820116364379771	0.0334070721002734	0.973349970091508	0.999803489356147	ENSMUSG00000039021
Tor2a	350.302493215404	0.0354991442178499	0.163174483612958	0.217553280585536	0.827777189218168	0.999803489356147	ENSMUSG00000009563
Ptrh1	66.4632889267391	-0.214185796173941	0.165431997163708	-1.29470598098376	0.195421675921348	0.999803489356147	ENSMUSG00000053746
Cfap157	10.8862224420987	0.119483542116317	0.440753226823493	0.271089432464135	0.786322249041988	0.999803489356147	ENSMUSG00000038987
Stxbp1	132.968251124837	0.227699464549482	0.186037477476617	1.22394405491819	0.220973332856782	0.999803489356147	ENSMUSG00000026797
Gm13523	1.41583235186198	-0.543763989496786	1.00040889574008	-0.543541737595725	0.58675686198015	0.999803489356147	ENSMUSG00000087496
Fam129b	58.2691844912799	0.0891474034875434	0.275000686836582	0.324171566671464	0.745808147236998	0.999803489356147	ENSMUSG00000026796
Lrsam1	86.8209169327589	-0.0636705828447253	0.22800125716306	-0.279255402522583	0.780048828945367	0.999803489356147	ENSMUSG00000026792
Rpl12	56626.3143030746	0.242904239410227	0.353200136858288	0.68772408066106	0.49162655267823	0.999803489356147	ENSMUSG00000038900
Slc2a8	26.1746420991025	0.0846576290849736	0.254827259345646	0.332215750003984	0.739726351731765	0.999803489356147	ENSMUSG00000026791
Garnl3	5.23609276207748	-1.05028777251772	0.870795866860363	-1.20612397519123	0.227769691781779	0.999803489356147	ENSMUSG00000038860
Ralgps1	36.5844381280133	0.0281710780995566	0.351702040316204	0.0800992740168038	0.936158300144727	0.999803489356147	ENSMUSG00000038831
Zbtb34	72.8687773096635	0.0815622877391535	0.168634942314941	0.483661847417296	0.628625874103931	0.999803489356147	ENSMUSG00000068966
Zbtb43	378.152368026302	0.156203127060577	0.271487646091942	0.575359981601807	0.565047863067838	0.999803489356147	ENSMUSG00000026788
Gm13529	3.77144699074052	1.09418355421864	0.661956884227477	1.65295290416926	0.0983404488384114	0.999803489356147	ENSMUSG00000081244
Mvb12b	23.9934337306707	-0.107966776365508	0.30103940021951	-0.358646663150346	0.719859433833466	0.999803489356147	ENSMUSG00000038740
Pbx3	129.511128866484	0.24416097775467	0.269441007466866	0.906176012516192	0.36484269732436	0.999803489356147	ENSMUSG00000038718
Mapkap1	1125.9728715664	0.0840536198358472	0.15116158782925	0.556051448273968	0.57817568442734	0.999803489356147	ENSMUSG00000038696
ENSMUSG00000083503	1.21888866581798	0.823859702750757	1.59375824606062	0.516928903607015	0.605205789997002	0.999803489356147	ENSMUSG00000083503
Gm13408	1673.63388688615	0.212891763359554	0.258993447780651	0.821996715298597	0.411078766354233	0.999803489356147	ENSMUSG00000081992
Gm13414	484.883744040037	0.127040520241361	0.165322967541632	0.768438421657108	0.442226761329599	0.999803489356147	ENSMUSG00000087635
Gapvd1	1801.77899742888	0.0612874479815598	0.111256793361637	0.550864770858051	0.581726378979476	0.999803489356147	ENSMUSG00000026867
Hspa5	76976.1458751701	-0.0488261941278835	0.167343665427855	-0.291771989116214	0.770460963251445	0.999803489356147	ENSMUSG00000026864
Rabepk	529.054345209198	0.0725649674574479	0.0585943613997976	1.23842918881438	0.215556963217228	0.999803489356147	ENSMUSG00000070953
Fbxw2	1181.82957207946	0.0304760007463813	0.0824026356237693	0.369842548307889	0.711499810542304	0.999803489356147	ENSMUSG00000035949
Gm34653	1.22871971441974	0.476852146938879	1.36530407068231	0.349264429205557	0.726890800345464	0.999803489356147	ENSMUSG00000107167
Psmd5	1521.11103348403	-0.106078061822103	0.149810663099595	-0.708080851037832	0.478895050379929	0.999803489356147	ENSMUSG00000026869
Phf19	530.36628415849	-0.0344281574610867	0.25187008185698	-0.136690142819885	0.891275721286515	0.999803489356147	ENSMUSG00000026873
Gm13448	1.6531119586952	0.00682880003715499	0.89240729068926	0.00765211143880357	0.993894558009326	0.999803489356147	ENSMUSG00000086001
Traf1	6004.43334062051	0.189404889815974	0.204890191688902	0.924421458414956	0.355266926663682	0.999803489356147	ENSMUSG00000026875
Gm13450	3.72887194259682	-0.13693038827676	0.673429742822339	-0.20333284910002	0.838874881901904	0.999803489356147	ENSMUSG00000083533
Hc	4.43520900101613	-1.25191086480987	0.634749391848931	-1.97229155456651	0.0485763331825588	0.999803489356147	ENSMUSG00000026874
AI182371	15.71919119272	0.13957962389337	0.30665364852837	0.455170269661594	0.648986747434915	0.999803489356147	ENSMUSG00000035875
Cntrl	4106.2435802849	0.14258512329799	0.27700152307774	0.514744907225559	0.606731288198232	0.999803489356147	ENSMUSG00000057110
Rab14	3007.13698959354	-0.0681003155368711	0.0619056117652387	-1.10006691792538	0.271302966534407	0.999803489356147	ENSMUSG00000026878
Gsn	161.28043052465	0.410773214535333	0.163330401327771	2.51498319477581	0.0119038057778215	0.999803489356147	ENSMUSG00000026879
Stom	89.5602032100396	0.18833807590071	0.203253960426881	0.926614544214322	0.354126700734682	0.999803489356147	ENSMUSG00000026880
Glo1-ps	39.2107193562219	0.0690608481000764	0.256561775378447	0.269178243712286	0.787792521593289	0.999803489356147	ENSMUSG00000075391
Ggta1	1112.92130417818	0.0513646468517431	0.147670237425573	0.347833441235111	0.727965273536291	0.999803489356147	ENSMUSG00000035778
Dab2ip	14.6991449957777	0.316371718222807	0.33455097498048	0.945660727012577	0.344321659693338	0.999803489356147	ENSMUSG00000026883
Ttll11	17.9132149228123	-0.0998882656242427	0.304632266699402	-0.327897851092735	0.742988898573453	0.999803489356147	ENSMUSG00000026885
Ndufa8	1946.13371767535	0.0730384384408655	0.310523178601872	0.2352109068628	0.814045040996037	0.999803489356147	ENSMUSG00000026895
Lhx6	0.883766427137133	1.39509926291206	1.34597101257681	1.03650022911058	0.299968832593216	0.999803489356147	ENSMUSG00000026890
Rbm18	384.674580759643	-0.131233456333539	0.111146538610836	-1.18072463590643	0.23771213140546	0.999803489356147	ENSMUSG00000026889
Mrrf	766.553858816862	-0.0949611888165212	0.109755830759773	-0.865204045736456	0.386926805228735	0.999803489356147	ENSMUSG00000026887
Ptgs1	15.5646899363486	0.23363134878708	0.320997972603923	0.727828113342497	0.466718812722206	0.999803489356147	ENSMUSG00000047250
Gm13430	18.1716075923954	0.417677792682703	0.269545404003281	1.54956377099874	0.12124625421947	0.999803489356147	ENSMUSG00000083101
ENSMUSG00000075387	0.844728532354851	-3.12565413949569	3.0172710871682	-1.03592088652174	0.300239052603878	0.999803489356147	ENSMUSG00000075387
Gm13436	1403.47880658016	0.305669630123231	0.433292197842963	0.705458421926198	0.480524997992061	0.999803489356147	ENSMUSG00000083716
ENSMUSG00000053146	0.825146021319585	-0.733451440130371	2.10107499486417	-0.349083893684521	0.727026327889883	0.999803489356147	ENSMUSG00000053146
ENSMUSG00000055088	1.63922861156321	-0.986738391176515	2.16258319551238	-0.456277655918216	0.648190329385602	0.999803489356147	ENSMUSG00000055088
ENSMUSG00000075380	0.771529715166058	0.954243100165504	2.57410694102596	0.370708413452772	0.710854723130932	0.999803489356147	ENSMUSG00000075380
ENSMUSG00000059429	0.866336586782943	-0.745505968266245	2.60074020357823	-0.286651456858528	0.774379210119044	0.999803489356147	ENSMUSG00000059429
Pdcl	1202.70389982527	-0.0383962523543294	0.175214146905393	-0.219138996664816	0.82654177400349	0.999803489356147	ENSMUSG00000009030
Rc3h2	538.479604987548	0.0616824451129354	0.190257721878423	0.324204686695193	0.745783074082733	0.999803489356147	ENSMUSG00000075376
Zbtb6	900.126664139997	-0.144065019898849	0.170365682109404	-0.845622299720753	0.397763481367316	0.999803489356147	ENSMUSG00000066798
Zbtb26	199.197594751441	-0.162612172425716	0.166719130682731	-0.975366004847812	0.329378740243573	0.999803489356147	ENSMUSG00000050714
Rabgap1	940.213124774891	0.134902301894897	0.249143234656792	0.54146484082031	0.588187225262908	0.999803489356147	ENSMUSG00000035437
Strbp	3537.55637031816	0.0167746297924619	0.153928932755483	0.108976457461109	0.913221163331164	0.999803489356147	ENSMUSG00000026915
ENSMUSG00000107491	0.987901516730904	-1.80745563207419	2.46891944038623	-0.732083681025832	0.464117493634906	0.999803489356147	ENSMUSG00000107491
Dennd1a	238.964496213325	0.250698188277578	0.274888244680512	0.91200039699388	0.361768508575868	0.999803489356147	ENSMUSG00000035392
Gm44283	2.48905919670575	-0.694240573966313	1.51875854671662	-0.457110562746909	0.64759157848352	0.999803489356147	ENSMUSG00000107586
Gm13556	2.30193575259444	1.20028783752693	1.12215452726177	1.069627941934	0.284786812776178	0.999803489356147	ENSMUSG00000087294
Gm13588	2.52930526819105	0.921274383451675	1.04359108394466	0.882792501416701	0.377348392693209	0.999803489356147	ENSMUSG00000084124
Nek6	472.484390786851	-0.100163011065856	0.103274158165471	-0.969874873299571	0.332108865979689	0.999803489356147	ENSMUSG00000026749
ENSMUSG00000107535	0.971125866945432	-1.23473655093517	1.71193165438092	-0.721253414396195	0.470753613479466	0.999803489356147	ENSMUSG00000107535
Psmb7	4444.03762783107	0.045416449810692	0.203691492697162	0.222966846623364	0.823561309545892	0.999803489356147	ENSMUSG00000026750
Gm13586	22.3271790208063	0.748320450692489	0.368478542773574	2.03083860747985	0.0422713692036371	0.999803489356147	ENSMUSG00000082931
Nr6a1	88.2463718586863	0.0636701058739495	0.27189583592131	0.23417094880547	0.814852267538632	0.999803489356147	ENSMUSG00000063972
5730507A11Rik	1.07303974902783	0.942182828412614	2.1035749507581	0.447896010585724	0.654228247694327	0.999803489356147	ENSMUSG00000107468
Olfml2a	11.2724733804912	-0.0722607182002488	0.486395003577913	-0.148563857911163	0.881897793661599	0.999803489356147	ENSMUSG00000046618
Gm13496	10.1562920507801	0.344131704130473	0.3936124328409	0.874290737329358	0.3819599423578	0.999803489356147	ENSMUSG00000085755
Wdr38	3.81628461804655	0.177344088790084	0.578621726454068	0.306494002354338	0.759228545686091	0.999803489356147	ENSMUSG00000035295
Rpl35	29871.0599133683	0.106538810067122	0.354976687286079	0.300129033491321	0.764078733924582	0.999803489356147	ENSMUSG00000062997
Arpc5l	6408.91895893502	0.0846954899439947	0.281989001941716	0.300350330547644	0.763909946065047	0.999803489356147	ENSMUSG00000026755
Golga1	479.647215930013	0.0131410199020093	0.241386112035388	0.0544398341362854	0.956584742842444	0.999803489356147	ENSMUSG00000026754
Scai	203.668364656015	0.0570547322188577	0.131119027541914	0.43513693846318	0.663463032815666	0.999803489356147	ENSMUSG00000035236
Gm16523	9.86734213350672	0.180197987131847	1.3691355480991	0.131614424431557	0.895289275735187	0.999803489356147	ENSMUSG00000082315
Gm44027	2.63623109422036	-0.722486946283872	1.48050599774524	-0.488000013092953	0.625549831797453	0.999803489356147	ENSMUSG00000107955
Ppp6c	1641.00868588189	-0.0853577982388737	0.102422804514465	-0.833386652938393	0.404626699735465	0.999803489356147	ENSMUSG00000026753
Gm13453	57.6634710402127	0.079450642832961	0.269092199098477	0.295254351850925	0.76779958479536	0.999803489356147	ENSMUSG00000083240
Gm13456	14501.0499435453	0.109396862740464	0.29817846653144	0.366883846486379	0.713705661172467	0.999803489356147	ENSMUSG00000082536
Gm13461	2605.19398012086	-0.00943061689063031	0.247078796681786	-0.0381684588774165	0.969553368732162	0.999803489356147	ENSMUSG00000081999
Gm13464	256.897498500444	0.15543325513761	0.189994263835677	0.818094462430937	0.413303250625079	0.999803489356147	ENSMUSG00000080994
Kynu	1211.59223618757	-0.0825451218004876	0.18655726545447	-0.442465328806147	0.658152514103762	0.999803489356147	ENSMUSG00000026866
Arhgap15	831.635939602273	0.0913203562916672	0.104765934593114	0.871660780255847	0.383393462081356	0.999803489356147	ENSMUSG00000049744
Gtdc1	249.18903136274	-0.139643548913755	0.0977279422374963	-1.42890094395313	0.153032706107804	0.999803489356147	ENSMUSG00000036890
Gm13477	2.20775312973114	0.581950869683207	0.711331479293291	0.818114882616155	0.413291591549425	0.999803489356147	ENSMUSG00000083849
Zeb2	1653.83043499815	0.12194842932788	0.10117542575835	1.2053166904298	0.228081068773303	0.999803489356147	ENSMUSG00000026872
Zeb2os	75.728997063767	0.538424281785591	0.477440396579206	1.12773088671031	0.259433589293869	0.999803489356147	ENSMUSG00000052248
ENSMUSG00000085591	2.5694727811202	-2.2783850874322	1.61869957933757	-1.40754042103637	0.159267200079449	0.999803489356147	ENSMUSG00000085591
Acvr2a	70.8718802492408	-0.0617822251809514	0.164840729953339	-0.374799512222737	0.707809577061229	0.999803489356147	ENSMUSG00000052155
Orc4	1573.77439552112	-0.0715905692228829	0.0830647564786904	-0.861864553124271	0.388762056984994	0.999803489356147	ENSMUSG00000026761
Mbd5	166.920255301478	-0.0594132196081634	0.170599476934407	-0.348261440631539	0.727643849281845	0.999803489356147	ENSMUSG00000036792
Ap2m1-ps	1851.74964480347	-0.00428417950850451	0.0624309486716094	-0.0686226879402322	0.945289959069749	0.999803489356147	ENSMUSG00000081272
Epc2	1096.54683460434	0.0586715705966968	0.192931483613735	0.304105734832591	0.761047337866697	0.999803489356147	ENSMUSG00000069495
Kif5c	32.0359368334924	0.149022602226628	0.229348726623944	0.649764245131281	0.515844517891519	0.999803489356147	ENSMUSG00000026764
Lypd6b	1.14100955353182	-1.41482329250555	1.78117107181734	-0.794321957554588	0.427008024383975	0.999803489356147	ENSMUSG00000026765
Mmadhc	1718.20972819633	-0.123912311009407	0.105997781377906	-1.16900853393932	0.242400193082136	0.999803489356147	ENSMUSG00000026766
ENSMUSG00000085862	1.79970436609142	-0.750052640067535	0.971016920917542	-0.772440339514155	0.439853669517427	0.999803489356147	ENSMUSG00000085862
Gm13487	101.966119614703	0.351653496997844	0.212796266783389	1.65253602571798	0.0984253273723722	0.999803489356147	ENSMUSG00000083449
Gm13498	6.90683289421886	0.061120547454705	0.516413696338649	0.118355783140624	0.905785759398046	0.999803489356147	ENSMUSG00000083270
Rnd3	14.6318154864384	-0.195252337356312	0.437778788683506	-0.446006847301755	0.655592299804447	0.999803489356147	ENSMUSG00000017144
Gm13493	2327.49866921615	0.308432209312213	0.193387470803763	1.59489240968041	0.110736297274807	0.999803489356147	ENSMUSG00000087701
Rbm43	502.998815418228	-0.179457061318475	0.121943025673893	-1.47164678198481	0.141116285542154	0.999803489356147	ENSMUSG00000036249
Nmi	2740.37699657278	-0.00889987361290412	0.210723497198163	-0.0422348420144847	0.966311487419364	0.999803489356147	ENSMUSG00000026946
Rif1	3296.45908706847	0.022110414291919	0.263806537653247	0.0838129884445149	0.933205121071475	0.999803489356147	ENSMUSG00000036202
Neb	18.8852053622341	-0.204994581358748	0.359457147706533	-0.57028934510466	0.568481466357965	0.999803489356147	ENSMUSG00000026950
ENSMUSG00000086447	1.05969183684791	-0.770506205768981	1.52505960305663	-0.505230224592324	0.613397143971703	0.999803489356147	ENSMUSG00000086447
Arl5a	3650.62339450219	0.0344323368022347	0.144844519883896	0.237719292589287	0.812098819229355	0.999803489356147	ENSMUSG00000036093
A430018G15Rik	0.888405469162422	-1.10035036242571	1.3334618347121	-0.825183243930851	0.409267564912189	0.999803489356147	ENSMUSG00000085315
Cacnb4	6.44853366635348	0.311875053809768	0.470838788329361	0.662381820572534	0.507726551525777	0.999803489356147	ENSMUSG00000017412
Bloc1s2-ps	56.6920307062623	-0.212080631161555	0.267709470375924	-0.792204440372419	0.428241479894364	0.999803489356147	ENSMUSG00000025201
Stam2	605.8693918162	-0.108866414918451	0.159332540516308	-0.683265418135404	0.494439141987568	0.999803489356147	ENSMUSG00000055371
Fmnl2	105.315002576774	-0.073154493760365	0.307913777571981	-0.237581099284405	0.812206011409956	0.999803489356147	ENSMUSG00000036053
Prpf40a	14316.1596044284	0.0466985323722485	0.0710616897947967	0.657154825716906	0.511081369117705	0.999803489356147	ENSMUSG00000061136
Arl6ip6	940.679966964551	-0.297632102490398	0.234859865745698	-1.2672752815616	0.205056875781758	0.999803489356147	ENSMUSG00000026960
Gm13502	7018.24674047302	0.0461275635811399	0.318818532156052	0.144682817743361	0.884961305856361	0.999803489356147	ENSMUSG00000083287
ENSMUSG00000060988	1.78092590558333	-1.33286620682085	2.19839047772901	-0.606291839563337	0.544320976524009	0.999803489356147	ENSMUSG00000060988
Nr4a2	14.0692205172143	-0.0870940717949155	0.332379349160563	-0.26203213892462	0.793296664333323	0.999803489356147	ENSMUSG00000026826
A930012O16Rik	9.30850961829	0.454558585843284	0.39558071377482	1.14909187939338	0.250518096536375	0.999803489356147	ENSMUSG00000054181
Gpd2	533.517612737367	0.0629474540512095	0.114713580975427	0.548735847281181	0.583186741657792	0.999803489356147	ENSMUSG00000026827
Gm13532	66.0787949363683	0.846240166836883	0.473653751078666	1.78662190452354	0.0739986189352128	0.999803489356147	ENSMUSG00000081642
ENSMUSG00000026828	1.16288473085431	-3.00427404832634	1.96647804393625	-1.52774349939487	0.126576235349533	0.999803489356147	ENSMUSG00000026828
ENSMUSG00000026830	5.20481095836166	-0.0539547345557249	0.517681262571707	-0.10422385057495	0.916991707021991	0.999803489356147	ENSMUSG00000026830
Gm13534	10.4850467131819	0.0886745674281053	0.509716318363096	0.173968468800204	0.861890242578485	0.999803489356147	ENSMUSG00000053472
Cytip	2858.727510861	-0.0124041370782463	0.145735529272992	-0.0851140222300274	0.932170742633256	0.999803489356147	ENSMUSG00000026832
Gm13546	18.7904427287894	0.0432636000238084	0.315006997712508	0.137341710939682	0.890760702232849	0.999803489356147	ENSMUSG00000086862
Acvr1	29.4634090657557	-0.259075997607548	0.377760220180568	-0.685821279656473	0.492825815705358	0.999803489356147	ENSMUSG00000026836
ENSMUSG00000026839	0.855061599094795	0.0811252357073066	1.75835911123979	0.0461368984235004	0.963201136619714	0.999803489356147	ENSMUSG00000026839
Pkp4	840.145772497824	-0.125248198091431	0.250308838369263	-0.500374652798561	0.61681129764548	0.999803489356147	ENSMUSG00000026991
Gm13549	47.9134117586364	0.282885025358742	0.249958566746853	1.13172766607049	0.257748946433336	0.999803489356147	ENSMUSG00000080982
Gm13552	910.349962971635	0.0223494606894455	0.313323071510983	0.0713304021362566	0.943134799442451	0.999803489356147	ENSMUSG00000081157
Tanc1	180.210891718306	0.0556238723365296	0.117100216390969	0.47501084157535	0.634779245809639	0.999803489356147	ENSMUSG00000035168
Wdsub1	102.554682692334	0.0497866046019013	0.16019903029158	0.310779687687774	0.755968112450314	0.999803489356147	ENSMUSG00000026988
Baz2b	1260.07795711124	0.148519757791499	0.14544335707123	1.02115188195748	0.307182485633334	0.999803489356147	ENSMUSG00000026987
Gm13620	0.983906926929282	1.76484293295107	1.45592328552282	1.21218126703518	0.225443000673803	0.999803489356147	ENSMUSG00000086603
Marchf7	1955.77037093575	-0.0456447011921667	0.179259222318704	-0.254629583916275	0.79900920749314	0.999803489356147	ENSMUSG00000026977
Cd302	30.4451919338793	0.387013243344977	0.509876748495807	0.759032931952103	0.447832857173989	0.999803489356147	ENSMUSG00000060703
Rpl10a-ps4	51.2610259424729	0.435158118266414	0.309810167702755	1.40459598693327	0.160141450647449	0.999803489356147	ENSMUSG00000080198
Ly75	2158.79396026717	0.154446067637301	0.229032991150199	0.674339827033983	0.500095288954685	0.999803489356147	ENSMUSG00000026980
Gm13571	4.60133794264027	0.591125388954624	1.21391591317426	0.486957442883252	0.626288489893677	0.999803489356147	ENSMUSG00000086196
ENSMUSG00000054580	1.85741245311597	-1.36306837587645	0.986146574011426	-1.38221681421231	0.166905138852804	0.999803489356147	ENSMUSG00000054580
ENSMUSG00000026971	0.864473432191715	0.017520305640208	2.08465378252882	0.00840441985477063	0.993294322097247	0.999803489356147	ENSMUSG00000026971
Rbms1	2869.33158553772	0.0137858908110514	0.147842931815525	0.0932468711338404	0.925707438788569	0.999803489356147	ENSMUSG00000026970
Tank	2078.77429302586	-0.12396566523971	0.159082157954052	-0.77925561756281	0.435829153345551	0.999803489356147	ENSMUSG00000064289
Psmd14	7997.25588965541	-0.13347220770876	0.183846801285459	-0.725996899459339	0.467840671302416	0.999803489356147	ENSMUSG00000026914
ENSMUSG00000087794	1.18448517546147	-1.46122783181785	1.35281141242652	-1.08014156178419	0.280079146543297	0.999803489356147	ENSMUSG00000087794
Slc4a10	4.01188897874699	0.120011047512562	0.603390815304564	0.198894388957488	0.84234535879398	0.999803489356147	ENSMUSG00000026904
Dpp4	1553.8569986937	0.0672118702308584	0.225472739897723	0.298093109887015	0.765632100172726	0.999803489356147	ENSMUSG00000035000
Gm13561	29.8039525645367	0.309035685411242	0.378508812302763	0.81645572141673	0.414239538393389	0.999803489356147	ENSMUSG00000087518
Gm13565	3.64933977128361	0.551359696204023	0.603650182574769	0.91337617732888	0.361044730337469	0.999803489356147	ENSMUSG00000087681
ENSMUSG00000087422	1.64004052558067	-0.127955552862464	0.855061587420784	-0.149644838155379	0.881044830731357	0.999803489356147	ENSMUSG00000087422
ENSMUSG00000000394	4.02600730124802	0.200607484440197	0.713952611589039	0.280981512195476	0.778724579966722	0.999803489356147	ENSMUSG00000000394
ENSMUSG00000000392	5.68467988863433	0.503586529434187	0.516684081463117	0.974650753722002	0.329733528688624	0.999803489356147	ENSMUSG00000000392
Ifih1	2317.21175703216	-0.0537762514143819	0.164494044203464	-0.326919139685481	0.743729044427008	0.999803489356147	ENSMUSG00000026896
Gca	196.98658247957	-0.204677669821865	0.120579233644187	-1.69745372927018	0.0896109119243343	0.999803489356147	ENSMUSG00000026893
Kcnh7	15.8053510702831	-0.281839596874683	0.328759821168954	-0.857281147898672	0.391289524696655	0.999803489356147	ENSMUSG00000059742
ENSMUSG00000075324	1.73721380281207	-1.2685986357056	1.80222013978423	-0.703908810972163	0.481489564010493	0.999803489356147	ENSMUSG00000075324
Gm13577	2689.18382155448	0.537404528013343	0.326239650952315	1.6472691974891	0.0995027262087556	0.999803489356147	ENSMUSG00000082127
Gm13578	15.0823953074273	0.132067048384288	0.389038586470607	0.339470307000681	0.734255462028566	0.999803489356147	ENSMUSG00000084104
ENSMUSG00000026888	1.32520755978899	0.811127901137988	1.44646103814188	0.560767196453465	0.574956251906577	0.999803489356147	ENSMUSG00000026888
Cobll1	558.642948045421	-0.108465084940029	0.192209537403765	-0.564306466812733	0.572545581128775	0.999803489356147	ENSMUSG00000034903
Gm13594	0.926289491628212	-1.49271169854546	1.33497981284221	-1.11815301189269	0.263501648638601	0.999803489356147	ENSMUSG00000086881
ENSMUSG00000057182	12.1501880707895	-0.537705730197591	0.723418058144994	-0.743284915469749	0.457309202235234	0.999803489356147	ENSMUSG00000057182
ENSMUSG00000075318	1.07436350343538	-1.74248711543632	1.74761360234909	-0.997066578730059	0.318732194148431	0.999803489356147	ENSMUSG00000075318
ENSMUSG00000044647	1.01139563061052	-0.740604758995964	1.47366445614313	-0.502559966014428	0.615273682001133	0.999803489356147	ENSMUSG00000044647
Galnt3	39.1098667769811	0.124591418681974	0.292280981219033	0.426272753575458	0.669909109222207	0.999803489356147	ENSMUSG00000026994
Ttc21b	341.084372739903	0.043422460211751	0.168423833973335	0.257816599868078	0.796548452633925	0.999803489356147	ENSMUSG00000034848
ENSMUSG00000064329	1.92258776671472	-1.73565388036018	1.83876416354231	-0.943924139252587	0.345208415527018	0.999803489356147	ENSMUSG00000064329
Gm13602	1.11163052677492	-0.0872222561298924	1.28698066835407	-0.0677727787795302	0.945966513312597	0.999803489356147	ENSMUSG00000082218
ENSMUSG00000027022	1.25146240529746	-1.21755578218146	1.77774507662823	-0.684887725573536	0.493414772088155	0.999803489356147	ENSMUSG00000027022
ENSMUSG00000087043	1.39130377992367	-0.157351398671802	2.1460022239877	-0.0733230361613564	0.941549060830777	0.999803489356147	ENSMUSG00000087043
Gm13604	38.7852090278393	0.268566112717211	0.306741978603141	0.875544044999065	0.381277955844428	0.999803489356147	ENSMUSG00000083910
Stk39	1208.28494270655	-0.0417228339632917	0.17752050781658	-0.235031064728595	0.814184622284001	0.999803489356147	ENSMUSG00000027030
Gm13597	0.764298535505416	0.05057297970936	1.23177652871992	0.0410569437963852	0.967250499512283	0.999803489356147	ENSMUSG00000075312
Gm13612	1.00972288972611	-1.9912275820005	1.52087025071587	-1.30926854612564	0.190443400265462	0.999803489356147	ENSMUSG00000082836
Cers6	101.903607277533	0.0936566261723249	0.218130957931552	0.429359624422104	0.667661531914371	0.999803489356147	ENSMUSG00000027035
Gm37666	3.03324009879067	1.31691309676628	1.33596332563994	0.985740455214571	0.324260491981615	0.999803489356147	ENSMUSG00000103546
Nostrin	57.7921966123787	0.0136194933200674	0.191582727204405	0.0710893592486363	0.943326636834347	0.999803489356147	ENSMUSG00000034738
Spc25	3662.32578130442	-0.0785426703288657	0.122490333848859	-0.641215252346196	0.521382841383472	0.999803489356147	ENSMUSG00000005233
ENSMUSG00000027048	1.12550344101229	0.80678672793543	2.13268301834352	0.378296596820126	0.705210273259607	0.999803489356147	ENSMUSG00000027048
ENSMUSG00000027070	0.82985113045685	0.632685966030533	2.13963111211714	0.295698619471137	0.76746025156936	0.999803489356147	ENSMUSG00000027070
Bbs5	87.3845035219938	0.00802195765975081	0.165048091880353	0.0486037588702697	0.961235074362231	0.999803489356147	ENSMUSG00000063145
ENSMUSG00000075307	2.76688650503639	-0.585096296750535	0.696447088591265	-0.84011593462762	0.400843386575478	0.999803489356147	ENSMUSG00000075307
Fastkd1	304.663532672078	0.0153611218249512	0.0865970916312287	0.177386116965291	0.859205111451669	0.999803489356147	ENSMUSG00000027086
Ppig	17657.3289404511	0.178962095841874	0.285739910370177	0.626311163918363	0.531110865203639	0.999803489356147	ENSMUSG00000042133
Gm13622	2.82349403187055	0.700186581462703	0.824838430122626	0.84887725388669	0.395949596963705	0.999803489356147	ENSMUSG00000082345
Ccdc173	243.820760327137	0.245837560305229	0.34527769136662	0.711999548340919	0.476465055706276	0.999803489356147	ENSMUSG00000070883
Phospho2	529.854886924901	0.0638876046608246	0.146102576060581	0.437279111590296	0.661908942193407	0.999803489356147	ENSMUSG00000027088
Gm13624	1.07986815222553	-0.0509029232527245	1.16762856470377	-0.043595133582261	0.965227130850333	0.999803489356147	ENSMUSG00000081857
Klhl23	8.74141569330805	0.134794931029351	0.434065886335759	0.310540254999639	0.756150152399137	0.999803489356147	ENSMUSG00000042155
Ssb	28465.4556482724	-0.100559500357887	0.121270700229375	-0.829215137437867	0.406982680811122	0.999803489356147	ENSMUSG00000068882
Mettl5os	29.9573814241963	0.559691679531161	0.77587370172425	0.721369571216732	0.470682162994521	0.999803489356147	ENSMUSG00000085735
Ubr3	1604.31748340536	0.0079172408539045	0.263446670321874	0.0300525371766186	0.976025153461849	0.999803489356147	ENSMUSG00000044308
Myo3b	7.70541868432618	0.428358783144427	0.428431775756948	0.999829628387408	0.317392964771546	0.999803489356147	ENSMUSG00000042064
Rpl9-ps7	466.232496865371	0.0700916246686454	0.299193229341709	0.234268752748391	0.814776342685988	0.999803489356147	ENSMUSG00000047965
Gad1	2.04920373622664	-0.85823359824243	1.0477952664921	-0.81908520269966	0.412737803728008	0.999803489356147	ENSMUSG00000070880
Gorasp2	2293.07515855853	-0.0331741170043472	0.0694909406884048	-0.477387651911331	0.633086105463009	0.999803489356147	ENSMUSG00000014959
Tlk1	2626.89900880499	0.150562727700013	0.327854498533464	0.459236424613662	0.646064396298969	0.999803489356147	ENSMUSG00000041997
Mettl8	133.709471072183	-0.0631577193712216	0.179007562737684	-0.352821514383569	0.7242222535834	0.999803489356147	ENSMUSG00000041975
Dcaf17	594.396999765278	0.00488478832398661	0.104693455320017	0.0466580103699438	0.962785796744586	0.999803489356147	ENSMUSG00000041966
Dync1i2	2638.38001949399	0.157061376928972	0.183622200913149	0.855350693695582	0.39235703107534	0.999803489356147	ENSMUSG00000027012
Slc25a12	757.373450246511	0.0378900108076238	0.147688333614422	0.256553851481223	0.797523203921724	0.999803489356147	ENSMUSG00000027010
Gm13641	12.1744551285909	0.542480833113643	0.538723305888535	1.00697487408478	0.313946848698112	0.999803489356147	ENSMUSG00000082190
Hat1	7944.32000628178	-0.0449234937714345	0.264235352783872	-0.170013184451435	0.86499976790754	0.999803489356147	ENSMUSG00000027018
Gm13642	12.1223952518491	0.840654948607866	0.551831403364733	1.52339091882423	0.127660932630355	0.999803489356147	ENSMUSG00000086846
Metap1d	339.113727266338	0.102285485021586	0.113962809983744	0.897533897559887	0.369434093823579	0.999803489356147	ENSMUSG00000041921
Dlx1as	7.08510542506794	-0.0625019242402583	0.494540387813332	-0.126383862229368	0.899428075793443	0.999803489356147	ENSMUSG00000084946
Itga6	140.166171981689	0.179758847087278	0.180353062128233	0.996705267801146	0.318907591987856	0.999803489356147	ENSMUSG00000027111
Pdk1	3299.02947331594	0.0445569702304776	0.181104771391746	0.24602869315959	0.805660021097199	0.999803489356147	ENSMUSG00000006494
Rapgef4	10.7080650176906	0.307247573487638	0.411861619510942	0.745997099347285	0.455669167264738	0.999803489356147	ENSMUSG00000049044
Map3k20	516.94596088962	0.0214751000663252	0.142873087114148	0.150308924515418	0.88052089223805	0.999803489356147	ENSMUSG00000004085
Cdca7	4409.95600024171	-0.178085993336394	0.156858638801668	-1.13532792772457	0.256237944908338	0.999803489356147	ENSMUSG00000055612
Ak3l2-ps	3.56354961304824	0.716196624411076	0.728640466166279	0.982921835482627	0.325645910181698	0.999803489356147	ENSMUSG00000081957
Sp3	2459.638560013	-0.130643445393449	0.189369590233562	-0.689886085893293	0.490265826566536	0.999803489356147	ENSMUSG00000027109
Hspe1-ps5	1.0428949521178	2.30629458348896	1.6928298516197	1.3623900720337	0.173074815225123	0.999803489356147	ENSMUSG00000084213
Sp3os	96.3598907478174	0.168959239946809	0.473553959824681	0.35678983659932	0.721249145406441	0.999803489356147	ENSMUSG00000063714
Ola1	6376.50260460618	-0.124330818706537	0.0709692206361618	-1.75189776063547	0.0797913896963254	0.999803489356147	ENSMUSG00000027108
Gm13666	1.00102822231876	0.12221904533626	1.10725255513056	0.110380459065049	0.912107649830562	0.999803489356147	ENSMUSG00000083569
Sp9	0.88675104355083	-0.371251398716692	1.47759949465221	-0.251253062863341	0.801618461739965	0.999803489356147	ENSMUSG00000068859
Cir1	1395.54361825131	0.359804465738983	0.316208994010811	1.13786917056092	0.255175116289899	0.999803489356147	ENSMUSG00000041777
Scrn3	170.809311897626	0.14903348815997	0.153853209463829	0.96867324821721	0.332708244126761	0.999803489356147	ENSMUSG00000008226
Gpr155	182.727925074594	-0.00510296509517979	0.105523495185674	-0.0483585677881582	0.961430478764094	0.999803489356147	ENSMUSG00000041762
D230022J07Rik	3.15664373011459	2.51503208171575	1.3920382385406	1.80672628961147	0.0708049665248644	0.999803489356147	ENSMUSG00000087176
Wipf1	4880.16666285536	-0.0125399569739253	0.134605795837298	-0.0931606020076781	0.925775973267639	0.999803489356147	ENSMUSG00000075284
Gm13708	5.00731840136554	2.19132606100147	1.413563223414	1.55021439770415	0.121090065245499	0.999803489356147	ENSMUSG00000086069
ENSMUSG00000027107	1.14597584305831	-0.103971825239468	1.59438161912466	-0.0652113797552121	0.948005700681645	0.999803489356147	ENSMUSG00000027107
Chn1	6.11607785563431	-0.0969035089791812	0.508361316647177	-0.190619360297306	0.848823820991641	0.999803489356147	ENSMUSG00000056486
Atf2	601.806314052396	-0.125066447753143	0.131451786162453	-0.951424483487668	0.341388936527503	0.999803489356147	ENSMUSG00000027104
Atp5g3	3550.09482468437	-0.141261798598855	0.163955349590851	-0.861587004945996	0.388914824540472	0.999803489356147	ENSMUSG00000018770
Lnpk	981.54543983615	-0.14465567930687	0.145218630825704	-0.996123420833589	0.319190181496536	0.999803489356147	ENSMUSG00000009207
Mrpl23-ps1	556.741236859985	0.243759379251796	0.462883695593523	0.526610424113643	0.598464151605802	0.999803489356147	ENSMUSG00000075279
Mtx2	1520.87882566424	-0.229181487039763	0.147508884690304	-1.55367920732999	0.120260955208399	0.999803489356147	ENSMUSG00000027099
Rps6-ps4	73506.8665498463	0.054585061160335	0.356537777077863	0.153097552825137	0.87832134569097	0.999803489356147	ENSMUSG00000081406
Gm13653	173.293626670881	0.236285270493542	0.290443702965501	0.813532082400174	0.415913059872794	0.999803489356147	ENSMUSG00000075276
ENSMUSG00000093242	1.22648367567673	-0.00729490714633436	1.25377179568803	-0.00581836915730838	0.995357639273645	0.999803489356147	ENSMUSG00000093242
Hnrnpa3	147493.301396718	0.0376252930478574	0.135593384969176	0.277486199318725	0.781406801275612	0.999803489356147	ENSMUSG00000059005
Nfe2l2	738.007651157402	-0.0917232577144423	0.117036464133754	-0.783715215538444	0.433207232441535	0.999803489356147	ENSMUSG00000015839
E030042O20Rik	4.70167881629649	1.01034837343499	0.622862095502045	1.62210605000875	0.104780642992416	0.999803489356147	ENSMUSG00000087222
Gm13657	0.94645385953572	-0.194635906150284	1.75846750643677	-0.110684960306534	0.911866172628352	0.999803489356147	ENSMUSG00000086813
Gm13669	1.22672557591426	-2.51852595983882	1.39097333936388	-1.81062130277105	0.0701994923146882	0.999803489356147	ENSMUSG00000081833
Agps	1534.14167667243	-0.00341304576484612	0.195260096230226	-0.0174794841892421	0.986054099592217	0.999803489356147	ENSMUSG00000042410
Ttc30b	30.2568299714307	-0.198371212773512	0.248421130315795	-0.798527937302841	0.424564187514688	0.999803489356147	ENSMUSG00000075273
Ttc30a2	82.1930143010057	-0.205537639223772	0.249632565947049	-0.823360679901713	0.410302916208915	0.999803489356147	ENSMUSG00000075272
Ttc30a1	182.166583614473	-0.161831335669478	0.12464182820322	-1.29837100435997	0.19415987789277	0.999803489356147	ENSMUSG00000075271
ENSMUSG00000075270	2.74493151661571	-0.140482579663248	0.921198279786376	-0.152499828479734	0.878792725708367	0.999803489356147	ENSMUSG00000075270
Rbm45	1021.44884150855	-0.130526039917824	0.0689201016819613	-1.89387474383234	0.0582416375741563	0.999803489356147	ENSMUSG00000042369
Osbpl6	2.20633370555557	0.353437597499086	0.924139956368515	0.382450293446837	0.702127391657237	0.999803489356147	ENSMUSG00000042359
Prkra	44.39554667281	0.302036702295899	0.330346676771808	0.91430222712528	0.360558060662865	0.999803489356147	ENSMUSG00000002731
Fkbp7	36.5036973382674	0.0761775938919952	0.296954208821145	0.256529766641148	0.79754179876683	0.999803489356147	ENSMUSG00000002732
Plekha3	1007.2913665934	-0.166953984035094	0.165366439417299	-1.00960016206063	0.312686891957286	0.999803489356147	ENSMUSG00000002733
Ttn	12.5909696967152	0.552166440455407	0.443067734546363	1.24623482461603	0.212678197502997	0.999803489356147	ENSMUSG00000051747
ENSMUSG00000044033	1.63513648349379	-0.466146539537011	0.998673936754443	-0.466765500111002	0.640667661496297	0.999803489356147	ENSMUSG00000044033
Sestd1	31.1177733220402	-0.0599383535107747	0.370663092694246	-0.161705750294963	0.871537576062967	0.999803489356147	ENSMUSG00000042272
Gm13651	14.422478867337	0.172979363946119	0.304762842531023	0.567586791452474	0.570315578103444	0.999803489356147	ENSMUSG00000081611
Cwc22	4328.97220395489	-0.0182305034348605	0.0578308289135352	-0.315238494369802	0.752580580138319	0.999803489356147	ENSMUSG00000027014
Ube2e3	1500.28541058828	-0.181674487695092	0.13806465265914	-1.31586531524197	0.188219252121667	0.999803489356147	ENSMUSG00000027011
Itga4	736.824854453507	0.408637775497389	0.282614201907014	1.44592087991331	0.148199394764698	0.999803489356147	ENSMUSG00000027009
Cerkl	26.4203489192112	0.569541128109858	0.286786893999561	1.98593847915076	0.0470401554366399	0.999803489356147	ENSMUSG00000075256
Itprid2	639.161441144977	0.0587631228072005	0.216484830006216	0.27144221978747	0.786050933783492	0.999803489356147	ENSMUSG00000027007
Dnajc10	2346.76489535934	-0.0050129088690121	0.159845316008698	-0.0313609994598735	0.974981643763619	0.999803489356147	ENSMUSG00000027006
Nckap1	47.3235963343661	0.299723587864606	0.356941529368351	0.839699399492686	0.401076950782598	0.999803489356147	ENSMUSG00000027002
Dusp19	82.1216427633939	0.247073775675821	0.170421692241334	1.44977891268642	0.147120181760784	0.999803489356147	ENSMUSG00000027001
Nup35	566.496605746178	-0.34179762374621	0.139728940325818	-2.44614768385998	0.0144391841483612	0.999803489356147	ENSMUSG00000026999
Gm13690	447.625759356972	-0.109049279191128	0.210362030261762	-0.518388603948314	0.604187164202479	0.999803489356147	ENSMUSG00000086436
Gm4735	9008.72736042161	0.095765326313164	0.134284845688337	0.713150659869889	0.475752534067307	0.999803489356147	ENSMUSG00000064193
Gm13675	1.06352486067935	-1.48046714831036	1.25454441959933	-1.18008348304095	0.237967013149942	0.999803489356147	ENSMUSG00000080979
Gm13680	557.878117734646	0.164607963712932	0.277004725803295	0.594242438411765	0.552349971972181	0.999803489356147	ENSMUSG00000081400
Zc3h15	10392.8665535176	-0.140681399250938	0.113869662398504	-1.23545987831774	0.216659399708467	0.999803489356147	ENSMUSG00000027091
Itgav	449.526595692015	-0.140815155405522	0.186646891457363	-0.754446829015041	0.450580961339604	0.999803489356147	ENSMUSG00000027087
Gm13684	1.56652195999665	-0.999182764503762	1.16631058195342	-0.856703848841243	0.391608575708544	0.999803489356147	ENSMUSG00000085335
Fam171b	4.4452905947807	2.43249459248757	0.823973658811614	2.95215091705221	0.00315568656219896	0.999803489356147	ENSMUSG00000048388
Gm13698	14.6283797565462	-0.135759581431421	0.388929174047788	-0.349059907279519	0.727044335064406	0.999803489356147	ENSMUSG00000094125
Gm13693	14.8671754289111	-0.121071348822726	0.387633217314329	-0.312334813980996	0.754786084747513	0.999803489356147	ENSMUSG00000094336
Gm13695	12.4624248068926	0.0140645377326826	0.375201181687163	0.0374853236587335	0.970098041946788	0.999803489356147	ENSMUSG00000096729
Gm13696	14.5560658927673	-0.11908157113616	0.374928656969569	-0.317611281299911	0.750779815694771	0.999803489356147	ENSMUSG00000096484
Gm13694	14.7227320608723	-0.117481074929119	0.368716547673439	-0.318621650344721	0.750013433878505	0.999803489356147	ENSMUSG00000096337
Gm13697	14.9601369797836	-0.129898740900092	0.367169547610172	-0.35378408080293	0.723500704611462	0.999803489356147	ENSMUSG00000095824
Gm13691	15.1975418986949	-0.142158704512359	0.367080987689666	-0.387267957970466	0.698557844210394	0.999803489356147	ENSMUSG00000079247
Calcrl	175.158751814951	0.191761929880052	0.126508763121124	1.51579957900981	0.129570038554843	0.999803489356147	ENSMUSG00000059588
Tfpi	114.176038534549	-0.0850047342273047	0.270516452580162	-0.314231291355986	0.753345378376329	0.999803489356147	ENSMUSG00000027082
Gm13710	24.4824548986107	0.407278066549544	0.641778880281545	0.634608085530757	0.525684053458659	0.999803489356147	ENSMUSG00000087362
Ctnnd1	20.0170975969746	0.271624493708292	0.273576813547275	0.992863723304367	0.320776370551809	0.999803489356147	ENSMUSG00000034101
Btbd18	2.28454778102822	-0.278518037530336	1.03798821988542	-0.268324853976744	0.788449276739664	0.999803489356147	ENSMUSG00000086598
Selenoh	4165.02410492711	0.102447597227782	0.410954136502974	0.249292045335185	0.803134884034819	0.999803489356147	ENSMUSG00000076437
Tmx2	625.438476827609	-0.176079094228935	0.0846979562528296	-2.07890605652072	0.0376259859427725	0.999803489356147	ENSMUSG00000050043
Med19	828.167364998224	0.0083716355788415	0.142263842735942	0.0588458417672594	0.953074895249002	0.999803489356147	ENSMUSG00000027080
Zdhhc5	1903.54339638995	0.13730441508421	0.24189991714264	0.567608359300291	0.570300929737021	0.999803489356147	ENSMUSG00000034075
ENSMUSG00000077382	1.73165121427963	1.54456485441111	1.10314658510892	1.40014470901762	0.161469989028029	0.999803489356147	ENSMUSG00000077382
Clp1	849.678406903912	-0.167817153775239	0.0744121876718541	-2.25523746883086	0.0241184272389941	0.999803489356147	ENSMUSG00000027079
Ube2l6	419.817489151948	-0.158598471510769	0.104652730840787	-1.51547379830969	0.129652460837675	0.999803489356147	ENSMUSG00000027078
Timm10	858.407652533435	-0.0181878041435762	0.329799641151808	-0.0551480410350244	0.956020523139664	0.999803489356147	ENSMUSG00000027076
Slc43a1	76.5331287432378	0.0123144589436058	0.160642545918286	0.0766575185497231	0.938896000336093	0.999803489356147	ENSMUSG00000027075
Slc43a3	1501.36117192743	0.0399214734363771	0.181331225832184	0.220157743119892	0.825748305308111	0.999803489356147	ENSMUSG00000027074
Prg2	12.6118503633171	-0.0276173420128766	0.333334162389138	-0.0828518199722832	0.933969364351043	0.999803489356147	ENSMUSG00000027073
Prg3	8.31191988211037	0.258669177661893	0.459521782550192	0.562909501757165	0.573496509706018	0.999803489356147	ENSMUSG00000027072
P2rx3	16.9909151797813	0.262731302928451	0.384535095674903	0.683244015653051	0.494452663704524	0.999803489356147	ENSMUSG00000027071
Ssrp1	32273.0047226996	0.0676717751532433	0.111854991832715	0.604995575471947	0.545181936556234	0.999803489356147	ENSMUSG00000027067
Tnks1bp1	818.550442162981	0.211352323817481	0.262370136022992	0.805550231520863	0.420502231867069	0.999803489356147	ENSMUSG00000033955
Gm13712	3.85655345147853	0.578801588539593	1.07684885814411	0.537495660753289	0.590925281462964	0.999803489356147	ENSMUSG00000082534
ENSMUSG00000085135	0.947482525085044	0.776424796496593	2.05930190424206	0.377033010505743	0.706149073271426	0.999803489356147	ENSMUSG00000085135
[truncated: 19,369 more rows]
