# Supplementary material for: The structure-selective endonucleases GEN1 and MUS81 mediate complementary functions in safeguarding the genome of proliferating B lymphocytes
Source: eLife. 2022 Oct 3;11:e77073. doi: 10.7554/eLife.77073 (PMC9581529; doi:10.7554/eLife.77073)
Supplement: Figure 4—figure supplement 1—source data 2. [file elife-77073-fig4-figsupp1-data2.csv]

	baseMean	log2FoldChange	lfcSE	stat	pvalue	padj	ENSEMBL
Mus81	211.588134462482	-1.9737390751548	0.153931694661757	-12.822174663196	1.23196059437275e-37	1.81923620971024e-33	ENSMUSG00000024906
Phlda3	110.173209062462	1.52739541997175	0.152927446328022	9.98771284453122	1.72516247918e-23	1.27377371650255e-19	ENSMUSG00000041801
Cd80	139.181949601228	1.19886673189778	0.175201801955932	6.84277626436362	7.76729153443941e-12	3.82331980296889e-08	ENSMUSG00000075122
Psrc1	472.427126824897	0.852631964098936	0.137083039129402	6.21982098962718	4.97722401071449e-10	1.83746667415552e-06	ENSMUSG00000068744
Cdkn1a	163.140958010685	1.39501939138839	0.23784514931398	5.86524213511213	4.4847774513043e-09	1.32453417246821e-05	ENSMUSG00000023067
Rsad2	183.997599421106	1.2368303707768	0.221585523864718	5.58172911842342	2.38139073288791e-08	5.86099949209262e-05	ENSMUSG00000020641
Plk2	98.7341067843832	1.16546075199284	0.220591442644048	5.28334525593296	1.26846012273569e-07	0.000267590723320542	ENSMUSG00000021701
Dglucy	135.291590744777	1.15945413718754	0.236361212254328	4.90543319747382	9.32213646719704e-07	0.00172074986513873	ENSMUSG00000021185
Inka2	60.1775428874215	1.20268467900632	0.251402887942617	4.78389364914866	1.71931678061663e-06	0.00282101676659621	ENSMUSG00000048458
Bhlhe41	222.806277444438	0.648936536908488	0.136592050526464	4.75090998639602	2.02503267435113e-06	0.00299036575021432	ENSMUSG00000030256
Tmeff1	32.915311503526	-1.11538921586795	0.238783364907357	-4.67113450847256	2.99540701554986e-06	0.00402119776351135	ENSMUSG00000028347
Mov10	887.933583541703	0.357204194224152	0.078540572260315	4.54802128306672	5.41526602407724e-06	0.00666393611479572	ENSMUSG00000002227
Xkrx	51.2797174240778	-0.988506887290101	0.220369115323958	-4.48568705209406	7.26793523805878e-06	0.00825581535849339	ENSMUSG00000031258
Bbc3	665.263344325657	0.462245360601587	0.105471161703534	4.38267061000903	1.17233293455162e-05	0.012365600317517	ENSMUSG00000002083
Serpine2	36.3934873204423	1.05064047442119	0.245157523938597	4.28557303705001	1.82268752452104e-05	0.0179437511164014	ENSMUSG00000026249
Thy1	1878.06882985993	0.394983457183513	0.092570746773268	4.26682803100789	1.98271876357725e-05	0.0182992549885907	ENSMUSG00000032011
Irf7	1810.67430975694	0.726604134609373	0.171294784185724	4.24183455476125	2.21700101405117e-05	0.0192579141026433	ENSMUSG00000025498
Lmna	115.363652032506	0.765148026812589	0.181036900488585	4.2264755127137	2.37380090742729e-05	0.0194743988888771	ENSMUSG00000028063
Gm43218	92.5389445087341	0.559298296132688	0.134943788506424	4.14467610790444	3.40294350035457e-05	0.0264480350893347	ENSMUSG00000105432
St14	691.015245720197	0.304852351138794	0.0740556631547558	4.11652989322015	3.84619464113854e-05	0.0283983781328464	ENSMUSG00000031995
Pde7b	46.0297131750665	0.978529275487928	0.240397377911753	4.07046567640656	4.69192539815594e-05	0.0329931725497946	ENSMUSG00000019990
Rrm2	7741.39726884057	-0.305539072248582	0.0768233033546111	-3.97716654851763	6.97413198822639e-05	0.0468122759409723	ENSMUSG00000020649
Cox6b2	32.8768451533608	1.32421096527621	0.337423454080643	3.92447812759253	8.69179555832468e-05	0.0558051065259915	ENSMUSG00000051811
Dbf4	4460.67980946029	-0.374698166278057	0.0974631140075949	-3.84451256347974	0.000120792296908052	0.0713495939376481	ENSMUSG00000002297
Fosl2	44.0615385022296	0.985362337205046	0.256224380531408	3.84570092495262	0.000120208313527775	0.0713495939376481	ENSMUSG00000029135
Ak1	7.33872518344661	2.02020900163891	0.527257633636132	3.83154054633013	0.000127343382567913	0.0723261434761682	ENSMUSG00000026817
Trp53inp1	490.911403902658	0.758522285040265	0.198539237574824	3.82051575449613	0.000133172897716401	0.0728357103917811	ENSMUSG00000028211
Cd48	1174.82298386561	-0.228968974679627	0.0602894383620943	-3.79782895479065	0.000145968990286511	0.0769830028414608	ENSMUSG00000015355
Mxd1	203.508987238369	0.498615108092225	0.13393286721678	3.72287339511056	0.00019696830302902	0.0992858363612128	ENSMUSG00000001156
Amd1	5998.71623145085	-0.312379862470188	0.0842317601307694	-3.70857574370071	0.000208428314972411	0.0992858363612128	ENSMUSG00000075232
Neat1	2440.04896647681	0.435012129355567	0.117271181625432	3.70945464457765	0.000207706160111207	0.0992858363612128	ENSMUSG00000092274
Ifit3	161.128074974655	0.973709176417347	0.263256789442294	3.69870489752662	0.000216702374995493	0.100001374111202	ENSMUSG00000074896
Tnfsf4	10.8558043459044	1.81087687519856	0.493922199381314	3.66632007524031	0.000246065906933934	0.110110765081618	ENSMUSG00000026700
Idh3b	3457.00079929257	-0.164021336485006	0.0453372393701782	-3.61780599709155	0.000297110963049143	0.129042282098432	ENSMUSG00000027406
Rilpl1	207.644193456267	0.632843452864611	0.177526109383427	3.56479086407383	0.000364146428660058	0.14160840369185	ENSMUSG00000029392
Ei24	1857.52490625332	0.231835072371727	0.0654046599876064	3.54462621494642	0.000393170214083147	0.14160840369185	ENSMUSG00000062762
Pno1	4054.07346847783	-0.31757984014632	0.0889896067366508	-3.5687295605895	0.000358716466680522	0.14160840369185	ENSMUSG00000020116
Zfp125	22.3018636480283	3.15026671013609	0.885654474055646	3.55699293846525	0.000375124235814669	0.14160840369185	ENSMUSG00000069755
ENSMUSG00000109975	25.3998624889968	2.73758840608682	0.768481956161794	3.56233270558464	0.000367574140932389	0.14160840369185	ENSMUSG00000109975
Lifr	322.926000741484	0.394764289053634	0.110505209302673	3.57235909098527	0.000353779849791423	0.14160840369185	ENSMUSG00000054263
Etv5	232.007201419585	0.623054333172523	0.175478390477901	3.55060433068531	0.00038434776468868	0.14160840369185	ENSMUSG00000013089
Steap4	26.6148650600566	1.22673014166005	0.346871628016343	3.53655370626695	0.000405384068465394	0.142531108072107	ENSMUSG00000012428
Bex2	14.0675809689674	1.55202354057708	0.441109317456011	3.51845558268412	0.000434066472850119	0.14906650243204	ENSMUSG00000042750
Mx2	809.467480453343	0.469006187380892	0.133602075614572	3.51047081584215	0.000447313906855076	0.150124646875657	ENSMUSG00000023341
Nr4a1	129.520509131305	0.81942654752998	0.234705099960485	3.49130269290246	0.000480671347026066	0.156757390942086	ENSMUSG00000023034
Rbmx	2210.93355061289	-0.230044527247275	0.0659703514692618	-3.48708961107267	0.000488307712015708	0.156757390942086	ENSMUSG00000031134
Gm45351	50.6579848394424	-0.774271944534494	0.224186992854557	-3.45368807831242	0.000552976562420769	0.173740529729096	ENSMUSG00000092178
Nxpe2	41.6897736990807	-0.671406032349731	0.195309707572348	-3.43764803447378	0.000586789876617876	0.176839308326861	ENSMUSG00000032028
Pou2af1	18341.7661827416	0.14722982612818	0.0427844980028536	3.44119559655368	0.000579149712974777	0.176839308326861	ENSMUSG00000032053
Ifi213	743.543265204757	0.581648410835462	0.170320929319532	3.41501430951129	0.000637786608548349	0.183541890618065	ENSMUSG00000073491
Herpud2	543.243118564334	-0.192459561738299	0.0565027753838649	-3.40619660593272	0.000658747220339774	0.183541890618065	ENSMUSG00000008429
Gpaa1	289.437978053233	-0.375671367827309	0.109994902200743	-3.41535253280829	0.000636995107347545	0.183541890618065	ENSMUSG00000022561
H2-T-ps	271.252551382823	0.383837275661322	0.112679237225885	3.40645965584462	0.000658112761710748	0.183541890618065	ENSMUSG00000073405
Zbp1	3590.31714266931	0.491329082922401	0.144661023485919	3.396416471298	0.000682743917753343	0.186705174693771	ENSMUSG00000027514
Glmn	727.650349597106	-0.329598422316646	0.0972465615949939	-3.38930669538052	0.000700695924955184	0.188130485887513	ENSMUSG00000029276
Gpr55	215.190043834795	0.460927149900101	0.136635222844772	3.37341382627048	0.000742422810029273	0.194324514840231	ENSMUSG00000049608
Fgf11	32.5520191137625	0.769206224839463	0.228211411659606	3.37058615625581	0.000750084468469774	0.194324514840231	ENSMUSG00000042826
Ybx3	11754.7030044674	-0.182615301830198	0.0545287012932412	-3.34897581455571	0.000811108756769328	0.204865035088606	ENSMUSG00000030189
Cgas	34.6620062428055	0.687145566610632	0.205335307580155	3.3464559734443	0.000818516765099734	0.204865035088606	ENSMUSG00000032344
Kank3	61.7603237349536	0.593572001472634	0.17773366129227	3.33967126517778	0.000838776138252288	0.206436787226192	ENSMUSG00000042099
Igkv8-16	109.7202553071	0.587331896707169	0.177064045161749	3.31705906848924	0.000909703814619675	0.220222889024406	ENSMUSG00000076591
Hmcn2	13.5274437036265	1.1529202926413	0.352826309064219	3.26767098434107	0.00108436343953	0.258270885669993	ENSMUSG00000055632
Gm17300	97.4701855631227	-0.518400319400033	0.160506135995596	-3.22978505578291	0.00123883316246614	0.290378560478373	ENSMUSG00000091021
Gm20482	31.4243775215328	-0.989614756502944	0.30691399238193	-3.22440416881172	0.00126235098855128	0.291267766374012	ENSMUSG00000092490
Lamtor3	701.108508516882	-0.300618797254864	0.0935005000454253	-3.21515710727552	0.00130373147590515	0.296187733918329	ENSMUSG00000091512
ENSMUSG00000111886	9.51564445138197	1.45919935771369	0.457327361558002	3.19071081324012	0.00141923258295738	0.317542538674722	ENSMUSG00000111886
Trappc5	2685.75900315559	0.417416452247389	0.131853242818587	3.16576553844565	0.00154675413008429	0.340909227447084	ENSMUSG00000040236
Zfp365	73.8116610884905	0.607145609624122	0.193036421127249	3.14523863465067	0.00165951404040063	0.357807195275244	ENSMUSG00000037855
Memo1	1107.6258289646	-0.2059071532032	0.0655115647954927	-3.14306571436631	0.0016718830144235	0.357807195275244	ENSMUSG00000058704
Ifi44	255.96284864553	0.893014324302039	0.284993839187075	3.13345132950698	0.00172763567492908	0.364457085881111	ENSMUSG00000028037
Ifitm3	124.889967377542	0.772048145911173	0.248739175242575	3.10384620821491	0.00191022597559533	0.397300098332624	ENSMUSG00000025492
ENSMUSG00000117526	61.0240755110994	0.820525977159166	0.264911207387613	3.097362264325	0.00195251107019595	0.400454596855327	ENSMUSG00000117526
Mir6924	10.1002460157683	1.13881646800064	0.368504453860451	3.09037368767299	0.00199904811943112	0.404382788762182	ENSMUSG00000104996
Gm11953	20.7334901189227	0.96028392108025	0.311735101047407	3.08044848929032	0.00206689103162278	0.412456484648291	ENSMUSG00000082816
Fas	625.325021925025	0.354737898258077	0.115776926513955	3.06397750345635	0.00218415333822094	0.430045231273447	ENSMUSG00000024778
Gm44705	101.27391054766	1.00028544428094	0.327101862975611	3.05802429610596	0.00222801511078865	0.432909199223895	ENSMUSG00000108506
Smox	30.5340034095004	0.915984972002463	0.302379792850076	3.02925325587685	0.00245159074223529	0.465772004089434	ENSMUSG00000027333
Ociad2	224.070015459915	0.753816961193143	0.248933142808195	3.02819043173357	0.00246022999383598	0.465772004089434	ENSMUSG00000029153
Ddit3	980.063609684836	0.693210470043608	0.229346887352532	3.02254143514085	0.00250661764040951	0.468547122733256	ENSMUSG00000025408
Gm43430	18.8882110342538	0.867900552997288	0.287948760272544	3.01407983898183	0.00257759964562779	0.474077527785574	ENSMUSG00000106149
Plcd3	73.2356985873745	0.578109351098648	0.191973254824386	3.01140568579458	0.002600411711968	0.474077527785574	ENSMUSG00000020937
Mtap	4207.66413951465	-0.214756744315902	0.0716403926268281	-2.99770473669179	0.00272021076848489	0.478206576407338	ENSMUSG00000062937
Ppat	4426.02264571693	-0.258029031655565	0.0860134774306889	-2.99986745523094	0.00270097113351392	0.478206576407338	ENSMUSG00000029246
ENSMUSG00000113753	297.829673061747	0.783425151070618	0.261097182680587	3.00051169846984	0.00269526400281868	0.478206576407338	ENSMUSG00000113753
Btg2	1556.06358344231	0.395593224304329	0.132527376449505	2.98499249666394	0.00283585279959831	0.481345267720324	ENSMUSG00000020423
Gm5846	242.393266668044	0.51036464502039	0.170936538147262	2.98569662491182	0.00282933179627955	0.481345267720324	ENSMUSG00000104309
ENSMUSG00000113750	30.670916061181	1.02579724099815	0.343547126844971	2.98589963600844	0.00282745423439783	0.481345267720324	ENSMUSG00000113750
Hivep2	166.450594171387	0.503230551585685	0.169234848684714	2.97356339723628	0.00294363590609125	0.490433997324138	ENSMUSG00000015501
Jag2	31.0351635662333	0.897470929878211	0.301945409824754	2.97229532450616	0.00295582215492979	0.490433997324138	ENSMUSG00000002799
Sgk3	1937.5615807168	-0.307479810699042	0.104787423417477	-2.93431979402748	0.00334279599954525	0.519611247634575	ENSMUSG00000025915
Lcmt2	185.716473100606	-0.282210510565536	0.0961402691149757	-2.93540379243203	0.00333113891794977	0.519611247634575	ENSMUSG00000074890
2810047C21Rik1	29.0699829200658	-0.946275372535125	0.321337291440201	-2.94480409756993	0.00323159204503259	0.519611247634575	ENSMUSG00000092574
Nars2	300.485103146889	-0.31662877572977	0.107864649539512	-2.93542673231219	0.00333089262801638	0.519611247634575	ENSMUSG00000018995
Vsir	212.073416220783	0.44537517674142	0.151349930309562	2.94268504670255	0.00325379260676781	0.519611247634575	ENSMUSG00000020101
Acod1	185.33631540298	0.703886503359786	0.238633003036491	2.94966117177073	0.00318122598075495	0.519611247634575	ENSMUSG00000022126
Gm7266	39.6818026789873	1.07083080573066	0.367819578116575	2.91129365982601	0.00359935555148938	0.536460734542238	ENSMUSG00000100441
Insyn1	29.0515810280756	0.800926483734992	0.274426441584761	2.91854705803782	0.00351666791531057	0.536460734542238	ENSMUSG00000066607
Ifrd2	1362.8503307706	-0.271506736236866	0.093161105221421	-2.91437865181571	0.00356397335676065	0.536460734542238	ENSMUSG00000010048
Tra2b	12527.3003792726	-0.157832511825093	0.0542678169894356	-2.90839986903874	0.00363283493290606	0.536460734542238	ENSMUSG00000022858
Epas1	13.0719805247296	1.46684292079629	0.503533574668672	2.91309853918177	0.00357861655883592	0.536460734542238	ENSMUSG00000024140
Samhd1	8054.94462172266	0.187952683206529	0.0657439528704599	2.85885887599222	0.00425167885298911	0.560576264482948	ENSMUSG00000027639
Jade1	1316.47131012949	-0.211396110506346	0.073636549356854	-2.87080413670511	0.00409429124517577	0.560576264482948	ENSMUSG00000025764
Tnfsf15	29.439729321548	0.970564092370185	0.339426597248902	2.85942262697366	0.00424412937473317	0.560576264482948	ENSMUSG00000050395
Rnf169	447.7482948698	0.355473901487223	0.124162182347239	2.86298045642501	0.00419676448459876	0.560576264482948	ENSMUSG00000058761
Gm3200	108.999770023656	0.605120451796216	0.21157282871442	2.86010474725469	0.00423501100873756	0.560576264482948	ENSMUSG00000097388
Gde1	536.149998338565	-0.226692653732733	0.079290206322063	-2.85902464185736	0.00424945773424691	0.560576264482948	ENSMUSG00000033917
Amd2	2220.24349489082	-0.333102187245581	0.115486293571196	-2.88434390735925	0.00392230151960307	0.560576264482948	ENSMUSG00000063953
Msrb3	109.963966581525	0.579363483614351	0.200494510235562	2.88967255479291	0.00385643292396711	0.560576264482948	ENSMUSG00000051236
Srsf2	12911.4066415919	-0.393594899817816	0.136614525310417	-2.88106187042327	0.00396337831943408	0.560576264482948	ENSMUSG00000034120
Bmp1	22.4154541146903	0.783659823855204	0.272547291359531	2.87531686683115	0.0040362221220846	0.560576264482948	ENSMUSG00000022098
Slain1	504.369030407777	-0.299330428049399	0.104085466982548	-2.87581385496967	0.00402987287136255	0.560576264482948	ENSMUSG00000055717
Gm6222	10.7815406980019	1.3283220044342	0.460702237255331	2.88325494650902	0.00393588750279418	0.560576264482948	ENSMUSG00000083019
Gm12715	16287.2953757547	-0.278009152185469	0.0974620527390861	-2.85248611508032	0.00433787074667611	0.561906467685668	ENSMUSG00000059195
H1f0	751.631066550194	0.515859039333136	0.180732992206232	2.85426049243126	0.00431371445596492	0.561906467685668	ENSMUSG00000096210
Bcl2l11	1387.46037900487	0.378216196599627	0.13298023686304	2.84415342852157	0.00445295996779612	0.571798781256047	ENSMUSG00000027381
Arl4c	137.406230351857	0.684713575796978	0.243424555215521	2.81283691857115	0.00491065491802226	0.601892381117756	ENSMUSG00000049866
Olfm1	16.7442229142333	0.970730681755222	0.345318414821121	2.81111762388366	0.00493697338426828	0.601892381117756	ENSMUSG00000026833
Srsf6	10596.75284301	-0.283368387953034	0.100572704713242	-2.81754765133332	0.00483919333529626	0.601892381117756	ENSMUSG00000016921
P2rx7	8.20271096898715	1.3385874981321	0.47586153218331	2.81297690105459	0.00490851770360297	0.601892381117756	ENSMUSG00000029468
Zfp930	351.398709921824	-0.253711418776915	0.0905798113718778	-2.80097093308459	0.00509491079025662	0.601892381117756	ENSMUSG00000059897
Gm10157	253.723744520811	0.790997767463606	0.282166278253505	2.8033036844784	0.00505820159932036	0.601892381117756	ENSMUSG00000066270
Gstt3	43.5096945690936	0.619248769308595	0.221070896833363	2.80113202677857	0.00509236803025971	0.601892381117756	ENSMUSG00000001665
Ccng1	4125.79391853483	0.384673955378896	0.137119096009234	2.80540031676545	0.00502541229099479	0.601892381117756	ENSMUSG00000020326
ENSMUSG00000114999	40.265550667445	0.788009013326657	0.279426406754672	2.82009500275508	0.00480094335180588	0.601892381117756	ENSMUSG00000114999
Cbr3	30.9031680987268	0.738455223775508	0.261536077161279	2.82353100876455	0.00474978310582539	0.601892381117756	ENSMUSG00000022947
Tmem63b	337.950990826328	0.39121818664709	0.13989768136812	2.79645940391004	0.00516659013183345	0.605516162514163	ENSMUSG00000036026
Dhx58	1645.82499319236	0.304273339713492	0.108917918935373	2.7936022161242	0.00521245527766003	0.606081315631541	ENSMUSG00000017830
Gclm	641.838087674305	-0.242980924451204	0.0871180261107243	-2.78910043419008	0.00528546713482229	0.607570162317818	ENSMUSG00000028124
Cox6a2	13.9558086693314	1.22286697277508	0.43865731905125	2.78775007201511	0.00530754729728439	0.607570162317818	ENSMUSG00000030785
Il18rap	50.8259186689505	0.591071989826958	0.213386231780902	2.76996310818147	0.00560626422097326	0.60974628751851	ENSMUSG00000026068
Gpr107	491.160608750077	0.211163969162983	0.0760825369320659	2.77545909584392	0.00551238329577292	0.60974628751851	ENSMUSG00000000194
Trp53inp2	113.554370839328	0.445463526232132	0.16121781652897	2.76311598694854	0.00572524175623173	0.60974628751851	ENSMUSG00000038375
Lrrc40	1016.58910322171	-0.192312339658601	0.0695294917994314	-2.76591033073211	0.00567641409984585	0.60974628751851	ENSMUSG00000063052
Mmgt2	250.280886151485	-0.273928536002512	0.0989951016623066	-2.76709181972397	0.00565588228320541	0.60974628751851	ENSMUSG00000048497
ENSMUSG00000113843	84.7785537200256	0.568252108120558	0.205716579045847	2.7623058421262	0.00573946867780002	0.60974628751851	ENSMUSG00000113843
BC147527	265.645865528909	0.65009175910865	0.235158339202535	2.76448524561464	0.00570126854530793	0.60974628751851	ENSMUSG00000094796
Rsph1	26.0763861058087	0.616445135526734	0.222363668984653	2.77223855111546	0.0055672221349572	0.60974628751851	ENSMUSG00000024033
Cyp39a1	29.9713047152546	0.756134903426196	0.27254468189738	2.77435207380381	0.0055311782290957	0.60974628751851	ENSMUSG00000023963
Usp14	2223.45824923067	-0.269907118669646	0.097086623755795	-2.78006493817883	0.00543480291877447	0.60974628751851	ENSMUSG00000047879
Fam136a	2462.10365783326	-0.252074036038938	0.0915906667196115	-2.75218038111479	0.00591999028647402	0.620543469596591	ENSMUSG00000057497
Gnl3	12645.8417291529	-0.181881469540863	0.066093164486392	-2.75189531253736	0.00592514588021394	0.620543469596591	ENSMUSG00000042354
Tmem64	457.18112397585	-0.250986989591755	0.0915477369173682	-2.74159687659235	0.0061141328040934	0.622434048212571	ENSMUSG00000043252
Sox5	49.6756275973198	0.695236279449882	0.254530501456927	2.73144584036241	0.00630571041467048	0.622434048212571	ENSMUSG00000041540
Dnaja4	39.5728606899384	0.692823234553233	0.253311476059923	2.73506453528911	0.006236804712179	0.622434048212571	ENSMUSG00000032285
ENSMUSG00000112099	878.339282332163	0.683406432817857	0.249011959314632	2.74447233256921	0.00606082631793163	0.622434048212571	ENSMUSG00000112099
Gm2445	100.259730931688	0.533631320495035	0.194612169161367	2.74202442115817	0.00610618016042467	0.622434048212571	ENSMUSG00000098113
ENSMUSG00000115593	395.788599232388	0.603965877869925	0.220436726893347	2.7398604868695	0.00614652689337939	0.622434048212571	ENSMUSG00000115593
Tg	65.5772897676325	0.592291467727914	0.216911542170045	2.73056685597484	0.00632255077076492	0.622434048212571	ENSMUSG00000053469
Gm10505	90.6796943526673	0.529755198691573	0.193776599205166	2.73384506108852	0.006259949337563	0.622434048212571	ENSMUSG00000073430
Maoa	284.834036038073	-0.313389427711754	0.114544908013248	-2.73595250236272	0.0062200003232999	0.622434048212571	ENSMUSG00000025037
Gm14416	11.6810806029537	-1.24895621545	0.457967490740326	-2.7271722135364	0.00638796900223635	0.624480506171119	ENSMUSG00000082724
Acot1	25.0871490852625	0.842410872968397	0.309128598028596	2.72511465565043	0.00642791609250424	0.624480506171119	ENSMUSG00000072949
Nup133	1743.4004914568	-0.181576508487334	0.0669579379234376	-2.71179958819754	0.00669190388263143	0.634041808321943	ENSMUSG00000039509
Gm4425	102.910794181728	-0.6158377208088	0.226619658833657	-2.71749469564261	0.00657782097492177	0.634041808321943	ENSMUSG00000093846
H2-T24	829.206168875692	0.222655650675469	0.0821154915757059	2.71149385338811	0.00669807828930881	0.634041808321943	ENSMUSG00000053835
Sipa1	1989.50928685624	-0.231531951004968	0.0853455057182178	-2.71287807197966	0.00667016441444162	0.634041808321943	ENSMUSG00000056917
Lgals3bp	1285.8405650059	0.467193321897553	0.172709323086056	2.70508455217999	0.00682870057137029	0.642289307881688	ENSMUSG00000033880
Zmat3	179.279955923228	0.543645750823294	0.20143406853821	2.69887688199164	0.00695739100740334	0.643969395926284	ENSMUSG00000027663
Gm6565	506.467365833079	-0.361241651756592	0.133896279258738	-2.69792150877125	0.00697738899899814	0.643969395926284	ENSMUSG00000079224
ENSMUSG00000051790	66.8283768662885	0.468249164281711	0.173432330610969	2.69989547296146	0.00693612645243305	0.643969395926284	ENSMUSG00000051790
Gsn	166.758096038377	0.484625417716241	0.179914910681587	2.69363676351389	0.00706771426712515	0.648254264488429	ENSMUSG00000026879
Il10	341.305260248194	0.621134189591234	0.231305942771252	2.68533606248716	0.00724569106823141	0.650623450551278	ENSMUSG00000016529
Ccne2	943.780197912312	-0.426990475181359	0.158928729921762	-2.68667896227171	0.0072166277304681	0.650623450551278	ENSMUSG00000028212
Srd5a3	265.814705290373	-0.257332055566574	0.0957704448405342	-2.68696732060767	0.0072104006767591	0.650623450551278	ENSMUSG00000029233
Gm6211	24.4494022398853	0.770438683129336	0.287024459301121	2.68422658126518	0.00726978190160227	0.650623450551278	ENSMUSG00000091577
Ctsc	2667.19000271669	-0.133368103702352	0.0497845890407446	-2.67890337697076	0.00738637047841574	0.657075499125092	ENSMUSG00000030560
Exo1	1417.66787230766	-0.169623465157002	0.0633870916647436	-2.67599381360082	0.00745080204241661	0.658812540592338	ENSMUSG00000039748
Slfn5	1278.50240038374	0.538815749958354	0.201511197295092	2.67387498655628	0.00749803966718942	0.658812540592338	ENSMUSG00000054404
Pitrm1	3542.50209963313	-0.27604041557102	0.103334809353416	-2.67132070304532	0.0075553423666902	0.658812540592338	ENSMUSG00000021193
ENSMUSG00000117515	235.654943155381	0.636288304045534	0.238307174760535	2.670034188794	0.00758435240067024	0.658812540592338	ENSMUSG00000117515
AA467197	19.4478930577308	1.01403266927258	0.380633667426922	2.66406457454861	0.0077202741178527	0.662821441269365	ENSMUSG00000033213
Tnfsf8	34.6597684294064	0.992966366228421	0.372602166524598	2.66495059728234	0.00769996335128419	0.662821441269365	ENSMUSG00000028362
2810006K23Rik	421.82772605701	-0.240567920516955	0.0904338629487742	-2.66015309611648	0.00781051400157259	0.662861265869094	ENSMUSG00000047635
Ttc39c	51.6295218351049	0.675979065800612	0.254054138957542	2.66076777404355	0.00779627076290639	0.662861265869094	ENSMUSG00000024424
Gm14388	58.9155386051197	-0.631197921526207	0.237667102972833	-2.6558068560223	0.00791189148893702	0.66762800924076	ENSMUSG00000084230
Fastkd2	815.24401203347	-0.268917792849195	0.101656504487421	-2.64535746340237	0.00816046591486586	0.683697244710085	ENSMUSG00000025962
ENSMUSG00000117988	16.8634494927843	1.16256064952475	0.439709052414163	2.64393157962492	0.00819492194174071	0.683697244710085	ENSMUSG00000117988
Gm5822	77.2841958932278	0.744743352581707	0.282085552844157	2.64013291383679	0.00828735181428028	0.687524293491443	ENSMUSG00000089993
Ighg2c	24.2496890226317	-0.841856026394004	0.319486759496263	-2.63502633949953	0.00841307543991615	0.694055223582356	ENSMUSG00000076612
1600014C10Rik	395.68600050106	0.406836712174408	0.154527367471017	2.63278096839845	0.00846889429701617	0.694778678244655	ENSMUSG00000054676
Lag3	47.2521792268157	0.688221275226399	0.261829482564257	2.62850947298304	0.00857599668445578	0.699678138338997	ENSMUSG00000030124
Gm13127	47.6113370037986	-0.48421317689909	0.184713260684601	-2.62143159134572	0.00875613333517891	0.70570419757522	ENSMUSG00000070610
Dusp8	12.8241782831642	1.11505442617142	0.425817153576182	2.61862261021369	0.0088285558103036	0.70570419757522	ENSMUSG00000037887
Cdc42bpg	97.1291373904428	0.498111041133904	0.190387481693571	2.61630143275708	0.00888880481810733	0.70570419757522	ENSMUSG00000024769
Carnmt1	3177.45136885567	-0.274610384630038	0.1047261828495	-2.62217505840611	0.00873705397929117	0.70570419757522	ENSMUSG00000024726
Gm15027	257.704902427283	-0.330339936134594	0.126237561144276	-2.61681177250446	0.00887552691598755	0.70570419757522	ENSMUSG00000094574
Trim30c	155.628501283148	0.64983038443632	0.248978698999279	2.60998385423406	0.00905464961144377	0.707550987391197	ENSMUSG00000078616
Ccrl2	94.4780414762918	0.702559179630631	0.269185946253511	2.60994004110817	0.00905580934630841	0.707550987391197	ENSMUSG00000043953
4833407H14Rik	10.3336315010931	0.990380381092324	0.379006349714446	2.61309706773648	0.00897258146467446	0.707550987391197	ENSMUSG00000097779
ENSMUSG00000111264	13.2091112537594	1.00679805069589	0.386262065469187	2.6065154740809	0.00914686908793431	0.710904293797505	ENSMUSG00000111264
Ets2	175.475662474108	0.332812964727425	0.127828286417691	2.60359404052345	0.00922519553250062	0.713238023185532	ENSMUSG00000022895
Eral1	323.137575081536	-0.303444399906051	0.117024612149637	-2.59299641615596	0.00951437620345452	0.73176454893965	ENSMUSG00000020832
Vma21	1281.69231583406	-0.224347561946869	0.0865813063715094	-2.59117783444179	0.00956480507207631	0.731831484452595	ENSMUSG00000073131
Fer1l5	28.9761112393734	0.620929844691268	0.241535190767136	2.57076346812712	0.0101474607232399	0.748627850446173	ENSMUSG00000037432
Ctla4	332.962515140533	0.746560550598941	0.289332306448424	2.58028755849296	0.00987180745558278	0.748627850446173	ENSMUSG00000026011
Uba2	7477.47528487527	-0.169781383323981	0.0660627077563055	-2.57000339662547	0.0101697517853877	0.748627850446173	ENSMUSG00000052997
Ankrd10	1178.25012795665	-0.196576082588047	0.0763804901723291	-2.57364259046431	0.01006341700171	0.748627850446173	ENSMUSG00000031508
Angpt2	7.32299284423034	1.30583748313123	0.508242883122515	2.56931779370622	0.0101898962510788	0.748627850446173	ENSMUSG00000031465
Enc1	69.3601965330955	0.580927576192301	0.225410129920744	2.57720261461435	0.00996035472450282	0.748627850446173	ENSMUSG00000041773
Rpl7a-ps3	261.694874348283	0.459789494787209	0.178866420009687	2.57057470464444	0.0101529926362944	0.748627850446173	ENSMUSG00000068579
ENSMUSG00000117359	16.9506732746778	0.812407005718354	0.315468500845715	2.57523969442412	0.0100170641465297	0.748627850446173	ENSMUSG00000117359
Tmem127	1012.15156121117	0.306513481855475	0.119488669250016	2.56520960338198	0.0103113494543251	0.753800482138705	ENSMUSG00000034850
Gm7027	225.206887025885	0.498161918176402	0.194360513676245	2.56308191799808	0.0103747566880477	0.754699665085713	ENSMUSG00000067121
Tmbim1	125.209750534681	0.327128220498957	0.128285716986853	2.54999721077665	0.0107723780917993	0.766750481023545	ENSMUSG00000006301
Eng	18.0617842085512	1.12791425413094	0.441492230071919	2.55477713378378	0.0106255806812536	0.766750481023545	ENSMUSG00000026814
Dusp16	446.653802976147	0.336647293471875	0.132064992408352	2.54910319027576	0.010800033862863	0.766750481023545	ENSMUSG00000030203
Ido1	469.029138033282	0.482210015705854	0.189151832748435	2.54932774744602	0.010793081446785	0.766750481023545	ENSMUSG00000031551
Il2rb	347.425827024387	0.465140167637792	0.182185124060122	2.55311826383967	0.0106763238371387	0.766750481023545	ENSMUSG00000068227
Mxd4	185.489789414193	0.383011838535585	0.150676880136637	2.54194165812473	0.0110238572690867	0.769376829874741	ENSMUSG00000037235
Metrnl	12.9180695717439	1.04145845578854	0.409820007269527	2.54125820436972	0.0110454315658864	0.769376829874741	ENSMUSG00000039208
Trib2	138.602271603991	0.568249523270911	0.22359296178279	2.54144637979678	0.0110394877723646	0.769376829874741	ENSMUSG00000020601
Slc25a29	15.1034583060774	-0.822195963879404	0.323211176514076	-2.54383518771541	0.0109642804490418	0.769376829874741	ENSMUSG00000021265
Sdccag8	615.885976579949	0.172422901061467	0.0681757629777381	2.52909382353036	0.0114357452577663	0.781099340360982	ENSMUSG00000026504
Gm5853	184.647130798897	0.346300816199958	0.137081462182545	2.5262410444587	0.0115290348040411	0.781099340360982	ENSMUSG00000105641
Mad2l1	3030.91512795001	-0.237043787313655	0.0938349383444961	-2.52617832436141	0.0115310933973518	0.781099340360982	ENSMUSG00000029910
Gm5909	305.27956776302	0.316435523976768	0.125212029698156	2.52719746448953	0.0114976836544347	0.781099340360982	ENSMUSG00000082491
ENSMUSG00000112051	180.979404429094	0.744918287868874	0.294390949748175	2.53037088438379	0.0113942012775109	0.781099340360982	ENSMUSG00000112051
ENSMUSG00000112614	77.801944983626	0.346801068774123	0.137052067044858	2.53043296793629	0.0113921850608944	0.781099340360982	ENSMUSG00000112614
Flot1	461.480971009683	0.2252045689826	0.0892373105923022	2.52365930223391	0.011614042618088	0.7831258782708	ENSMUSG00000059714
Lrrc25	72.3898333635531	0.393332561139856	0.156514579672063	2.5130729799357	0.0119684573123378	0.80335549605133	ENSMUSG00000049988
Glipr2	1429.07673678857	0.31141826315318	0.124059302661458	2.51023709203817	0.0120650125518523	0.804430653653074	ENSMUSG00000028480
Gm8000	9.76486570571576	0.921826416044899	0.367348390884724	2.50940643519567	0.0120934248737714	0.804430653653074	ENSMUSG00000101132
Dipk1a	640.914849143065	-0.205248365990186	0.0819108305925266	-2.50575368978022	0.0122190706985804	0.808226490817714	ENSMUSG00000029270
Gm12020	59.3893935496761	0.906487254985809	0.361932951403031	2.50457232885764	0.0122599535412181	0.808226490817714	ENSMUSG00000081302
Lin52	212.922304508679	-0.288509461292269	0.115598216761591	-2.495795085553	0.012567517751909	0.817553016045991	ENSMUSG00000085793
Thrb	17.4057782311558	0.747836341462422	0.299368761068625	2.49804401365376	0.0124880687672005	0.817553016045991	ENSMUSG00000021779
Tubb6	226.425098734288	0.34401031224399	0.137789424262963	2.49663799732167	0.0125376875138097	0.817553016045991	ENSMUSG00000001473
1700030C10Rik	6.9675799520547	4.2636508146233	1.70951272305704	2.49407375395183	0.0126286300955866	0.817925353603193	ENSMUSG00000099759
Tnfrsf18	47.8554954520292	0.633631477470874	0.255135491816932	2.48350973421419	0.0130094778758232	0.837240379458605	ENSMUSG00000041954
ENSMUSG00000115539	7.47246003248785	1.42872899134523	0.575481218292575	2.48266832336284	0.013040244279507	0.837240379458605	ENSMUSG00000115539
Spata5	1479.44418009232	-0.183444163759776	0.0739502338485634	-2.48064345726663	0.0131145479537307	0.838365929146065	ENSMUSG00000027722
Cep170b	162.363585296466	0.536419002272897	0.216500256618877	2.47768298592458	0.0132238580932685	0.841709967514208	ENSMUSG00000072825
Qsox1	156.166888515453	0.348190862506593	0.141207417804811	2.46581141358942	0.0136703286623699	0.848192198979902	ENSMUSG00000033684
Gm32031	19.6434806841653	0.880261918932868	0.356588431910683	2.46856555109267	0.0135655803593877	0.848192198979902	ENSMUSG00000109118
Neil1	227.030678715106	0.314207202689761	0.12732210020408	2.46781353893888	0.0135941110804306	0.848192198979902	ENSMUSG00000032298
Tent5a	235.243769573771	0.362277346299433	0.146848430087443	2.4670154531697	0.0136244477654404	0.848192198979902	ENSMUSG00000032265
Fos	18.8285050376598	0.946182796187526	0.382861264597808	2.47134636924287	0.0134605373866858	0.848192198979902	ENSMUSG00000021250
Carhsp1	541.518105289819	0.229755529982176	0.0930298065539888	2.46969803004847	0.0135227148598754	0.848192198979902	ENSMUSG00000008393
Alg12	158.889960467872	0.274032296763121	0.111205754574685	2.4641916941365	0.013732264632279	0.848470091317423	ENSMUSG00000035845
Fam172a	1256.03792768613	-0.18053853604796	0.0733783389270313	-2.46037916213244	0.013879030086675	0.850421731493482	ENSMUSG00000064138
Gm14650	55.764147736286	0.78979150170747	0.320933172660334	2.4609219893369	0.013858049467253	0.850421731493482	ENSMUSG00000083982
Xrcc5	1006.27320223406	-0.242645847477736	0.0994492929299534	-2.43989514986941	0.0146915253175362	0.85939400266989	ENSMUSG00000026187
Gm7733	30.0522048916039	0.928007004556301	0.378743055381898	2.45022843685031	0.0142765608408291	0.85939400266989	ENSMUSG00000106496
Eif4e	6341.12039806664	-0.215969865374369	0.0881737172543971	-2.44936781729704	0.0143107225673786	0.85939400266989	ENSMUSG00000028156
Rps18-ps1	43.7012933567136	0.817146004147921	0.335879922869037	2.43285158924648	0.0149804396868528	0.85939400266989	ENSMUSG00000083914
Gfi1	60.7051943888548	0.619492986355903	0.253386742475065	2.4448516141955	0.0144911749264379	0.85939400266989	ENSMUSG00000029275
Gm10167	113.0893033515	0.501701076972114	0.204579913638706	2.45234768188501	0.0141927453204102	0.85939400266989	ENSMUSG00000066554
Usp18	858.949937671999	0.511640132312836	0.210302525908319	2.4328767812132	0.014979397501574	0.85939400266989	ENSMUSG00000030107
Gm45162	26.8406033426427	0.665287919157668	0.2729507096119	2.43739215810656	0.0147936261117233	0.85939400266989	ENSMUSG00000109074
Gm4353	116.011734340727	-0.3229448039743	0.132634503342386	-2.43484761382672	0.0148980623554448	0.85939400266989	ENSMUSG00000091900
Spn	1099.49831228712	0.346310258238791	0.141855064147849	2.44129640573035	0.0146346376069816	0.85939400266989	ENSMUSG00000051457
ENSMUSG00000110313	48.7402002214008	0.843979464667655	0.34541132067154	2.44340417976692	0.0145494326339666	0.85939400266989	ENSMUSG00000110313
Amotl1	36.072598625485	0.569914729254728	0.23310551836854	2.44487875380836	0.0144900845530958	0.85939400266989	ENSMUSG00000013076
ENSMUSG00000034394	17.7433830272479	1.01879165366316	0.416402989963877	2.44664826674644	0.0144191477534582	0.85939400266989	ENSMUSG00000034394
Krt222	193.337687116843	0.347351416518178	0.14201290598991	2.44591443359984	0.014448528636294	0.85939400266989	ENSMUSG00000035849
Cox5b-ps	406.660262839405	0.551262270452748	0.224657217472988	2.45379283449476	0.0141358392258494	0.85939400266989	ENSMUSG00000079941
ENSMUSG00000116398	93.4786777246864	0.627745138058458	0.258116583655021	2.4320217212291	0.0150148068455903	0.85939400266989	ENSMUSG00000116398
Erdr1	10350.8430662444	-0.619580639817045	0.254207225950799	-2.4373053814645	0.0147971770491089	0.85939400266989	ENSMUSG00000095562
Rpl31-ps9	747.455428220769	0.640219573814984	0.266439561475475	2.40286979256987	0.0162669783405567	0.862953070280764	ENSMUSG00000094122
Dstyk	56.7285616802535	0.423129115455176	0.177097628313338	2.38924213432455	0.0168831711670187	0.862953070280764	ENSMUSG00000042046
Rbm8a2	507.342639436013	0.790222847557768	0.330278615409752	2.39259464793807	0.0167297125161266	0.862953070280764	ENSMUSG00000078184
Gm13268	305.898917749449	0.813181580108869	0.341633019321802	2.38027805896271	0.0172995786148733	0.862953070280764	ENSMUSG00000070271
Gm13532	63.4781288723191	0.739238737606103	0.314210744699999	2.3526844644091	0.0186384425757921	0.862953070280764	ENSMUSG00000081642
Gm13991	7.33430596454571	1.24618509347867	0.527820658920472	2.36100098095333	0.0182256824045618	0.862953070280764	ENSMUSG00000081787
Sulf2	7.37563108496592	1.31310750525858	0.542190160302281	2.42185786722226	0.0154413887101995	0.862953070280764	ENSMUSG00000006800
Slc7a11	31.1967675438305	0.741212498956334	0.314327871495413	2.3580871000399	0.0183693823398232	0.862953070280764	ENSMUSG00000027737
Gm38247	7.22501656835755	1.0116620073827	0.427467031740479	2.36664334852587	0.0179502213768328	0.862953070280764	ENSMUSG00000104166
Gm8565	34.7356110970381	0.844883579088604	0.354886582288616	2.3807143500328	0.0172791049953053	0.862953070280764	ENSMUSG00000098006
Gm5857	69.813421002005	0.558784435028253	0.230747807776212	2.42162402500562	0.0154513274541886	0.862953070280764	ENSMUSG00000106416
Cdkn2a	133.747980718237	0.756565375565962	0.321030336755581	2.35667875881144	0.0184391904184786	0.862953070280764	ENSMUSG00000044303
ENSMUSG00000081319	6.91632723021511	1.36141635619729	0.577854054123448	2.35598650988516	0.0184735885624086	0.862953070280764	ENSMUSG00000081319
Pithd1	2003.35565283529	-0.195890345689305	0.082723788190623	-2.36800501976419	0.0178842932485897	0.862953070280764	ENSMUSG00000028669
Fhad1	217.705915369509	0.332745174929314	0.138829913899277	2.39678298130132	0.016539716516575	0.862953070280764	ENSMUSG00000051435
Eef2-ps2	151.276980377333	0.576415384578085	0.24132967213223	2.38849777354462	0.0169174108319098	0.862953070280764	ENSMUSG00000082575
Gm10290	40.0003453135528	0.621652690334955	0.261628329515929	2.37609089002384	0.0174971522724822	0.862953070280764	ENSMUSG00000105775
Oas1a	1552.21874205372	0.409713631856381	0.171826819638295	2.38445681948167	0.0171043551850617	0.862953070280764	ENSMUSG00000052776
Gm6433	274.398803248964	0.529954679803133	0.220406619159778	2.40444085492259	0.0161972269743085	0.862953070280764	ENSMUSG00000083382
Gm15596	35.5742380946994	0.79902649377059	0.33234933164268	2.40417662289645	0.0162089398182129	0.862953070280764	ENSMUSG00000082289
Cecr2	157.539039260678	0.60755846320161	0.255876734569673	2.37441854267597	0.0175766139785169	0.862953070280764	ENSMUSG00000071226
Zfp772	133.231896865039	-0.311421564669732	0.131568421598184	-2.36699324113523	0.0179332603100645	0.862953070280764	ENSMUSG00000066838
Sertad3	86.7128836995269	0.526662045045068	0.223937369250626	2.35182741856558	0.0186814402570135	0.862953070280764	ENSMUSG00000055200
AF357399	34.6584875206646	-0.467837393206113	0.192638728667287	-2.42857392406348	0.0151583345570087	0.862953070280764	ENSMUSG00000077711
Gm7964	3210.17351728327	-0.24443547895897	0.102657160269156	-2.3810855308883	0.0172617035052853	0.862953070280764	ENSMUSG00000063902
Trim30b	341.642521157032	0.457941830661178	0.194218307880993	2.35787159129088	0.0183800495745286	0.862953070280764	ENSMUSG00000052749
Apobr	16.4687933809262	0.827237115870845	0.349934216552077	2.36397893301679	0.0180798406650257	0.862953070280764	ENSMUSG00000042759
Ypel3	358.765682799303	0.455616217903983	0.191943400542407	2.37370087544802	0.0176108108781699	0.862953070280764	ENSMUSG00000042675
Zfp629	66.1397186406532	0.419988390606958	0.177351977772929	2.36810660856958	0.0178793831313182	0.862953070280764	ENSMUSG00000045639
Cnot7	2497.00040506931	-0.202932714380919	0.0862185442872285	-2.35370146942947	0.0185875321564095	0.862953070280764	ENSMUSG00000031601
Ccdc102a	43.4840045782008	0.489406369176926	0.206262390796625	2.37273681976993	0.0176568399884135	0.862953070280764	ENSMUSG00000063605
Nqo1	30.5606459683303	0.652626929726998	0.276529425299626	2.36006323384884	0.0182718202336488	0.862953070280764	ENSMUSG00000003849
Gm43814	7.07686015265069	1.11182023782299	0.461260229643379	2.41039692210748	0.0159351735067933	0.862953070280764	ENSMUSG00000104654
Gm26581	9.45498611613751	-1.05655741907377	0.44022370631841	-2.40004662154558	0.0163929838307812	0.862953070280764	ENSMUSG00000097108
ENSMUSG00000111877	2605.01595809845	-0.311132522265478	0.130529959058083	-2.38361005021866	0.0171437576871406	0.862953070280764	ENSMUSG00000111877
Cdh23	39.1405935541586	0.923187189214092	0.38690492243822	2.38608282209567	0.0170289155347721	0.862953070280764	ENSMUSG00000012819
ENSMUSG00000112001	189.976586857741	0.690252033009569	0.290014105471424	2.38006365892979	0.0173096474556154	0.862953070280764	ENSMUSG00000112001
ENSMUSG00000112697	208.472155733745	0.677599876352497	0.286555308669619	2.36463906217047	0.0180476503472895	0.862953070280764	ENSMUSG00000112697
Krr1	3236.58518092621	-0.216592609384238	0.0903806846161104	-2.39644798337398	0.0165548430461724	0.862953070280764	ENSMUSG00000063334
Gm11945	6.18817129710783	1.35085420807454	0.572131051054123	2.36109228049352	0.0182211958555853	0.862953070280764	ENSMUSG00000081059
H2aw	31.3876879377216	0.760697974826112	0.313891536574572	2.42344213267882	0.0153742024483414	0.862953070280764	ENSMUSG00000078851
Adprm	629.823260906515	0.226132818936287	0.0935656190517083	2.41683666744422	0.0156560405422138	0.862953070280764	ENSMUSG00000020910
Slfn8	1141.02030968284	0.258678543216731	0.107929729340085	2.39673113977371	0.0165420565798361	0.862953070280764	ENSMUSG00000035208
ENSMUSG00000111713	13.1099423610742	0.82990757575706	0.351488659752843	2.36112191027906	0.0182197400267084	0.862953070280764	ENSMUSG00000111713
Dusp14	42.4803918819363	0.469808686006633	0.199412244818787	2.35596708935083	0.0184745543863511	0.862953070280764	ENSMUSG00000018648
ENSMUSG00000113570	23.8136172618158	-1.2353426107115	0.510679492588502	-2.41901746328185	0.0155624930623619	0.862953070280764	ENSMUSG00000113570
ENSMUSG00000114022	17.0512527160912	-1.08342553531412	0.460746831325513	-2.3514552063163	0.0187001410232169	0.862953070280764	ENSMUSG00000114022
Hspa2	188.928789599584	0.354709636208036	0.149889509530711	2.36647406025009	0.0179584326799807	0.862953070280764	ENSMUSG00000059970
Rad51b	111.290857534206	-0.357871348428487	0.151460493497294	-2.36280326417185	0.0181372951267118	0.862953070280764	ENSMUSG00000059060
Gm28707	6.70233916935825	-1.09259423318882	0.455863227530572	-2.39675886802154	0.0165408049244158	0.862953070280764	ENSMUSG00000100071
Fastkd3	637.228034972431	-0.203759888806657	0.0840093830151741	-2.42544203389583	0.0152897572469729	0.862953070280764	ENSMUSG00000021532
Phf11b	1279.86642498402	0.349842918781262	0.147441699904863	2.37275424121534	0.0176560072619671	0.862953070280764	ENSMUSG00000091649
Phf11d	129.842566808788	0.480523094387939	0.200076223451894	2.40170014256329	0.0163190792409163	0.862953070280764	ENSMUSG00000068245
ENSMUSG00000115473	38.7078242349359	1.05915862747733	0.436945464284194	2.42400645859193	0.0153503324844859	0.862953070280764	ENSMUSG00000115473
Sla	1207.88846809817	0.294166135133789	0.123810882897604	2.37593116412129	0.017504728032578	0.862953070280764	ENSMUSG00000022372
Iglv1	735.87589241728	0.320584616075244	0.134895187244779	2.37654598820872	0.0174755828386524	0.862953070280764	ENSMUSG00000076934
BC002059	581.044106801875	-0.291669296898906	0.123861030767728	-2.35481083187385	0.0185321371959207	0.862953070280764	ENSMUSG00000060149
Dusp1	99.8463871919243	0.475234012964012	0.200556167046093	2.36958065146305	0.0178082706288006	0.862953070280764	ENSMUSG00000024190
ENSMUSG00000103558	45.6031409980751	0.937715383623625	0.38831491276794	2.41483227347493	0.0157424570220926	0.862953070280764	ENSMUSG00000103558
Gm8034	75.2051038256966	0.898273497377665	0.373436286498917	2.40542638691934	0.0161536060228038	0.862953070280764	ENSMUSG00000094281
Rpl19-ps12	24.1797230236074	1.15484320808689	0.477388877594367	2.41908276938983	0.0155596992908353	0.862953070280764	ENSMUSG00000082109
Rragb	155.508113648986	-0.340244959354289	0.144161871357178	-2.36015914715266	0.0182670965405417	0.862953070280764	ENSMUSG00000041658
Mlkl	1139.26824547483	0.201776917307846	0.0858919896040612	2.34919365866343	0.0188141186077927	0.86550806691986	ENSMUSG00000012519
Mfge8	109.849645528706	0.399068283863936	0.170075701388371	2.34641562907717	0.0189549571225831	0.869279042947777	ENSMUSG00000030605
Klc3	21.8631660175369	0.629834174339595	0.268669277559522	2.3442731527056	0.019064203641955	0.871582338020895	ENSMUSG00000040714
Gm13604	46.7258052393467	0.700193337494911	0.299130382364443	2.34076302099543	0.0192443778666045	0.876368461785009	ENSMUSG00000083910
2010016I18Rik	6.51264199750391	1.57671498206008	0.674246915777199	2.3384830470342	0.0193622041007428	0.876368461785009	ENSMUSG00000091575
Egf	63.1508703861714	0.451237381267672	0.192939922735271	2.33874552695248	0.0193486074316126	0.876368461785009	ENSMUSG00000028017
Rpf1	2882.58512078547	-0.183076929704508	0.0783172134804654	-2.3376333448096	0.0194062766305748	0.876368461785009	ENSMUSG00000028187
Tmed6	8.51592355409824	-1.05431794004509	0.451249660045398	-2.33644040848479	0.0194683000022914	0.876488982115357	ENSMUSG00000031919
Atp2b4	10.6794098745982	0.891571346745312	0.385983911155845	2.309866605775	0.0208955403842182	0.879160440139837	ENSMUSG00000026463
Prkcq	24.3931804939693	0.937737039050906	0.404016538624162	2.3210362680802	0.0202848865149962	0.879160440139837	ENSMUSG00000026778
Gm13342	12.4190308687099	0.871984110289628	0.379536188996712	2.29749925190186	0.0215903056937603	0.879160440139837	ENSMUSG00000082516
Rbm45	1027.13707602638	-0.148935308207604	0.064786918762376	-2.29884845664393	0.0215135461246402	0.879160440139837	ENSMUSG00000042369
Gm5855	253.453067156695	0.567148781348967	0.243796565312157	2.32631981760198	0.0200014955772032	0.879160440139837	ENSMUSG00000105558
Kyat3	301.773717491976	-0.239478329907426	0.103558475907267	-2.31249376556941	0.0207504884875944	0.879160440139837	ENSMUSG00000040213
E2f2	991.187267587226	0.166623812191215	0.0723017407115679	2.30456155759686	0.0211911410496711	0.879160440139837	ENSMUSG00000018983
Oas3	664.382720694615	0.572560816392185	0.2482196664873	2.30666983198722	0.0210732332868234	0.879160440139837	ENSMUSG00000032661
Slc25a13	558.021161848948	-0.226959938816485	0.0987766185238088	-2.29770913611281	0.0215783492287004	0.879160440139837	ENSMUSG00000015112
Kdm7a	454.964677138725	0.272561439703686	0.118460573491914	2.30086206464542	0.0213994289601171	0.879160440139837	ENSMUSG00000042599
Igkv1-117	556.463721913407	0.302501946877402	0.131194730849543	2.3057476845188	0.021124734972405	0.879160440139837	ENSMUSG00000094335
Lair1	14.3390370591582	-0.725074228939313	0.314883234700224	-2.30267651318305	0.0212970506196067	0.879160440139837	ENSMUSG00000055541
Tmem159	13.8697128829895	0.736114457439358	0.317971573594038	2.31503228140505	0.0206111654811887	0.879160440139837	ENSMUSG00000030917
Leprotl1	163.619165784639	0.336142954709773	0.144953110912493	2.31897716850451	0.0203962743256802	0.879160440139837	ENSMUSG00000031513
Nod2	83.8819214105515	0.378672968673392	0.164402546500727	2.30332787863306	0.0212604022105573	0.879160440139837	ENSMUSG00000055994
Stoml1	845.315727011978	0.398191192764563	0.173014503808374	2.30149024503511	0.0213639361465905	0.879160440139837	ENSMUSG00000032333
Gm12599	37.6486635505163	0.501101888432903	0.214885715072503	2.33194602192998	0.0197035309701019	0.879160440139837	ENSMUSG00000081325
Etv4	9.77814076014476	1.01993953817924	0.442996761989042	2.3023634159305	0.0213146862872977	0.879160440139837	ENSMUSG00000017724
Hpcal1	47.9842252297382	0.46465663872655	0.200168846674602	2.32132345490257	0.0202693932774599	0.879160440139837	ENSMUSG00000071379
ENSMUSG00000113964	92.6661047438845	-1.10282034833123	0.478681128195525	-2.30387262704195	0.0212297946917575	0.879160440139837	ENSMUSG00000113964
ENSMUSG00000113691	32.8016727108292	-1.04331927551074	0.452788903256037	-2.30420681250834	0.0212110369740333	0.879160440139837	ENSMUSG00000113691
ENSMUSG00000113258	34.3266553591973	-0.520291446565456	0.224790891793094	-2.31455750904868	0.0206371605386993	0.879160440139837	ENSMUSG00000113258
Fgd3	460.405859166337	0.388600915185908	0.169168043620804	2.29712956932321	0.0216113794115772	0.879160440139837	ENSMUSG00000037946
Mettl6	1872.92163930601	0.176294059515101	0.075903934034807	2.32259449733209	0.020200946610807	0.879160440139837	ENSMUSG00000021891
Adsl	2958.8804892866	-0.185846600322219	0.0808050352019803	-2.299938362228	0.0214517123218758	0.879160440139837	ENSMUSG00000022407
Endou	395.020405737094	0.48415761863246	0.207852223136207	2.32933577195942	0.0198412847213796	0.879160440139837	ENSMUSG00000022468
ENSMUSG00000114993	3463.82741435734	0.420063512948146	0.181863948923637	2.30976790856185	0.0209010068783201	0.879160440139837	ENSMUSG00000114993
H2-M5	89.7079178936228	0.447483379995808	0.192052652487947	2.33000364326596	0.0198059585617154	0.879160440139837	ENSMUSG00000024459
E430014B02Rik	9.15332460377862	0.826222011968527	0.358660183757431	2.30363460842733	0.0212431634054127	0.879160440139837	ENSMUSG00000102973
Gm6741	662.258772334275	-0.233312582945151	0.100936599198628	-2.31147655852786	0.0208065465003139	0.879160440139837	ENSMUSG00000043346
Ehd1	1493.90277822893	0.207080527636871	0.0890802852627065	2.32465047710804	0.0200906573585456	0.879160440139837	ENSMUSG00000024772
Abhd17b	902.818061575255	-0.216424798956682	0.0939680850714942	-2.30317345290179	0.0212690858446381	0.879160440139837	ENSMUSG00000047368
Rcl1	2244.13504733827	-0.210572707754693	0.0906281206740065	-2.32348090403565	0.0201533323367927	0.879160440139837	ENSMUSG00000024785
Zcchc18	3771.53936237394	-0.264704353615063	0.114092003951302	-2.32009557591825	0.020335707616723	0.879160440139837	ENSMUSG00000031428
Fancb	464.554352917783	-0.27549091855317	0.119731072119352	-2.3009141543354	0.0213964838899527	0.879160440139837	ENSMUSG00000047757
Trnt1	4904.07406877437	-0.258515143231664	0.112787986121859	-2.29204503174972	0.0219030447859089	0.886143184530183	ENSMUSG00000013736
ENSMUSG00000117810	617.984281647241	0.839075110296598	0.365928686825626	2.29300172548767	0.0218479056129757	0.886143184530183	ENSMUSG00000117810
Gpn3	1265.30882076382	-0.252841152870242	0.110380999766559	-2.29062205818907	0.0219852820321483	0.887040054012934	ENSMUSG00000029464
Rgs2	38.3292880528183	0.544793795198265	0.239942695284513	2.27051627703137	0.02317627684291	0.892439398228615	ENSMUSG00000026360
Sirpa	101.319040605688	0.44255690890423	0.194493623794559	2.27543145255855	0.0228800603769935	0.892439398228615	ENSMUSG00000037902
Nfs1	783.105117740317	-0.168063562592975	0.0740055143275889	-2.27095999696771	0.0231493996944097	0.892439398228615	ENSMUSG00000027618
Rnf114	2210.68657365021	0.181761067023746	0.0798250091982121	2.27699400036922	0.0227865838959869	0.892439398228615	ENSMUSG00000006418
Lap3	3192.29702041966	-0.225885646495109	0.0996733588381813	-2.26625899967746	0.0234355301634409	0.892439398228615	ENSMUSG00000039682
Cct6a	24732.2672612418	-0.297116066650703	0.130437816786647	-2.27783685721057	0.0227362994715027	0.892439398228615	ENSMUSG00000029447
Igkv2-109	87.8224729161439	0.579099570897075	0.255267978246711	2.26859465442778	0.0232929869909835	0.892439398228615	ENSMUSG00000105606
Igkv4-57	124.363097493062	0.370757965883634	0.162714974082729	2.27857311826219	0.0226924534272234	0.892439398228615	ENSMUSG00000076556
Rpl15-ps5	35.7558937676745	0.568146227556092	0.249465553561147	2.27745361812781	0.0227591513606515	0.892439398228615	ENSMUSG00000108442
Ppp2r2d	1459.91065784923	-0.167992321138515	0.0736408934522581	-2.28123686803754	0.0225344342186861	0.892439398228615	ENSMUSG00000041769
ENSMUSG00000077394	12.3331995755982	1.03830834919408	0.45728472185472	2.27059488229296	0.0231715135654811	0.892439398228615	ENSMUSG00000077394
Zkscan6	348.67867563016	0.254099164305792	0.112012777864499	2.26848373150047	0.0232997394668052	0.892439398228615	ENSMUSG00000018347
Pitpnc1	140.040617072017	0.295866544966258	0.130011628901297	2.27569293198284	0.0228643946926309	0.892439398228615	ENSMUSG00000040430
Actg1	56296.4018695823	-0.271002020794638	0.118515180324096	-2.28664395610373	0.0222166133692581	0.892439398228615	ENSMUSG00000062825
L2hgdh	424.968827422764	-0.211586433643413	0.092848715538254	-2.27882994844704	0.0226771758925557	0.892439398228615	ENSMUSG00000020988
Asb2	33.1470171112553	0.601629683545884	0.265588912229777	2.26526656739863	0.0234963263519902	0.892439398228615	ENSMUSG00000021200
Gm2830	77.0612241750808	0.809256964077746	0.356642973464079	2.26909549406629	0.0232625193346679	0.892439398228615	ENSMUSG00000086567
ENSMUSG00000113015	143.903713249366	0.432885340605252	0.191114437856728	2.26505828371675	0.0235091031293378	0.892439398228615	ENSMUSG00000113015
Hmgb1-ps9	2459.24777633115	0.707615829121205	0.310673581346674	2.27768265989631	0.0227454915946376	0.892439398228615	ENSMUSG00000096722
Pbk	672.897599701997	-0.28253238317703	0.124705231955657	-2.26560168123093	0.0234757820617961	0.892439398228615	ENSMUSG00000022033
Fads2	2509.34691061444	0.341911018048376	0.150021000341261	2.27908770952475	0.0226618519713133	0.892439398228615	ENSMUSG00000024665
Gm15365	98.590289848064	-0.49787277175248	0.219650662949553	-2.26665726871412	0.0234111707056094	0.892439398228615	ENSMUSG00000080777
Rbbp7	16219.8485752814	-0.197692837848636	0.0870976151116608	-2.26978474204133	0.0232206467789817	0.892439398228615	ENSMUSG00000031353
ENSMUSG00000113407	40.0105384797161	-1.29276653452396	0.571083732699511	-2.26370750995315	0.0235921102898136	0.893294083717123	ENSMUSG00000113407
Gm8724	24.9601815706077	0.770150323566064	0.34046042134419	2.26208473961641	0.0236921682595925	0.894788359819444	ENSMUSG00000057370
Gm7278	30.7119820479348	-0.573572469473746	0.254005416613224	-2.25811117385394	0.0239387291814531	0.897216278737354	ENSMUSG00000080950
Slc22a5	117.886458344952	-0.289632457216943	0.128235461994042	-2.25859877379627	0.0239083541671238	0.897216278737354	ENSMUSG00000018900
ENSMUSG00000114737	29.5459474067378	0.847575155765635	0.375311481487003	2.25832461188637	0.0239254289535109	0.897216278737354	ENSMUSG00000114737
Rrad	1258.43493960995	0.137967487508526	0.0611533974045814	2.25608867804604	0.0240650780505893	0.897396483770333	ENSMUSG00000031880
Gm8624	67.2559676222107	0.833833699951894	0.36945755881816	2.25691335865262	0.0240134891518702	0.897396483770333	ENSMUSG00000083705
Pinlyp	6.63936725221467	1.34233254291986	0.595410276885632	2.25446653346512	0.0241668337588916	0.898920992739427	ENSMUSG00000011632
Rhbdl3	9.94355071803778	1.10878123547877	0.492165755662485	2.25286140435813	0.0242678890613092	0.900411853689329	ENSMUSG00000017692
Gm5530	20.297019322582	0.625530385678879	0.277993008978054	2.25016588718697	0.0244384168719926	0.901515948032936	ENSMUSG00000087008
Slc25a32	1228.87067027818	-0.21256335438439	0.0944844724179086	-2.24971732333133	0.0244668951355834	0.901515948032936	ENSMUSG00000022299
ENSMUSG00000109695	30.4588682351353	0.643294336909378	0.285972327318602	2.2494985544272	0.0244807946882378	0.901515948032936	ENSMUSG00000109695
Siah2	1870.32162167638	-0.246641024764576	0.109887597309959	-2.2444846443305	0.0248012358294676	0.901841319761398	ENSMUSG00000036432
Zbtb7b	306.250702900629	0.457704748885639	0.203884428799154	2.24492253568085	0.024773105948326	0.901841319761398	ENSMUSG00000028042
Prmt6	463.931788872258	-0.221752983317264	0.0990581499044939	-2.2386142233735	0.0251810279749735	0.901841319761398	ENSMUSG00000049300
Gm12678	9.36959722863545	-0.959343979464773	0.427432720984483	-2.24443270804155	0.0248045740204163	0.901841319761398	ENSMUSG00000084854
Igkv1-110	447.918355685836	0.376709722932439	0.168348252184564	2.23768122355939	0.0252418505596416	0.901841319761398	ENSMUSG00000093861
Asna1	1781.57273511893	-0.13682885230215	0.0611480705465431	-2.23766426445135	0.025242957305477	0.901841319761398	ENSMUSG00000052456
Tubb3	49.0506818425883	0.586131321452749	0.260808971394356	2.24735874045717	0.0246171096228184	0.901841319761398	ENSMUSG00000062380
Gm10778	443.717656358484	-0.24064191428382	0.107052146918954	-2.24789433196518	0.0245829286912794	0.901841319761398	ENSMUSG00000096856
ENSMUSG00000112740	209.93658794352	0.650155677659267	0.289786803248335	2.24356551220213	0.0248603703229109	0.901841319761398	ENSMUSG00000112740
Ighj2	9.06656650067396	1.03868370074475	0.463390678025814	2.24148596421891	0.0249946136951494	0.901841319761398	ENSMUSG00000076620
Csnk1e	1031.51147434541	0.314362842697233	0.140526089199292	2.23704256261916	0.0252835583653564	0.901841319761398	ENSMUSG00000022433
Usp27x	25.5218245268717	0.524832757012405	0.234513212196823	2.23796668893828	0.0252232274849193	0.901841319761398	ENSMUSG00000046269
Gm1866	235.983952132615	-0.357909281580434	0.159605762057252	-2.24245839853858	0.0249317611323556	0.901841319761398	ENSMUSG00000082070
Inpp1	363.985990236376	0.420972929723345	0.18835653214538	2.23497919041333	0.0254187149447148	0.904477502623142	ENSMUSG00000026102
Dab2ip	18.0735819149105	0.765752096830738	0.343175901898861	2.23136908096891	0.025656691180775	0.910750862179099	ENSMUSG00000026883
Grwd1	1824.77379939408	-0.238181436564623	0.106811181368342	-2.2299298024169	0.025752103507984	0.911945593530934	ENSMUSG00000053801
Pip5k1b	47.89725180016	-0.450412734389846	0.202121251138705	-2.22842839064336	0.0258519616326024	0.91329166848957	ENSMUSG00000024867
Rhobtb1	151.64886739071	0.554130264769706	0.24895073927728	2.22586310198709	0.0260233525361692	0.917152379240121	ENSMUSG00000019944
Gm5835	751.058565036911	0.512538091921571	0.230900642851313	2.21973436536345	0.0264368046166523	0.918570102997894	ENSMUSG00000101795
Ubap1	1206.31733289545	0.139574768759563	0.062836437249927	2.22123937747164	0.0263347524349589	0.918570102997894	ENSMUSG00000028437
Zfp987	436.605030788244	-0.680136824908294	0.306139128270325	-2.22165924607888	0.0263063426968858	0.918570102997894	ENSMUSG00000066009
Dimt1	555.500572537919	-0.216274728569141	0.0974209682405202	-2.22000183815856	0.0264186428377587	0.918570102997894	ENSMUSG00000021692
Gm17048	9.25471782220778	1.23695092410284	0.556291284735248	2.22356696580557	0.0261775931934248	0.918570102997894	ENSMUSG00000095991
ENSMUSG00000118241	263.699053935912	0.522744738660267	0.235317628800715	2.22144316736664	0.026320960008054	0.918570102997894	ENSMUSG00000118241
Bzw1	15819.8961361783	-0.258710628924272	0.116631890051611	-2.21818088354558	0.0265425016258348	0.918937936355567	ENSMUSG00000051223
Pter	74.7535298443916	-0.322742957110897	0.145527171790519	-2.21775049387666	0.0265718493142701	0.918937936355567	ENSMUSG00000026730
Haus2	518.415338526783	-0.180211814632364	0.0814133585066247	-2.21354109372235	0.0268603633763993	0.924167836400894	ENSMUSG00000027285
Gm14122	7.36598559464874	0.914322973595816	0.413501352470615	2.21117287315473	0.0270238681167918	0.924167836400894	ENSMUSG00000083964
Rpl28-ps3	275.015365659773	0.650345673287885	0.294128526498515	2.21109350062027	0.0270293629380435	0.924167836400894	ENSMUSG00000079942
ENSMUSG00000115188	160.916946170397	0.533060987243755	0.241095219079605	2.21099775133969	0.027035992776135	0.924167836400894	ENSMUSG00000115188
Tmem184b	992.467630701144	0.285282046177163	0.12901652442988	2.21120548269158	0.0270216108952645	0.924167836400894	ENSMUSG00000009035
Oas1g	280.04581451976	0.48275941897117	0.218723639570494	2.20716617517504	0.0273024519370102	0.931120803126627	ENSMUSG00000066861
Rpl31-ps11	179.295954297693	0.68270991420026	0.309582051644918	2.20526322689827	0.0274356286964804	0.931910974569737	ENSMUSG00000062896
H2ac20	11.751722607668	1.87555529021916	0.851618546834103	2.2023419959459	0.0276411598064295	0.931910974569737	ENSMUSG00000068855
Gm6063	1337.96095098162	0.497143242867175	0.22566513238911	2.20301310000324	0.0275938253388109	0.931910974569737	ENSMUSG00000108772
Itpr2	451.195080711724	0.441348136334331	0.200278779941092	2.20366898811819	0.0275476316558566	0.931910974569737	ENSMUSG00000030287
ENSMUSG00000111118	799.285923489927	0.641902896092739	0.291184544316739	2.20445387168112	0.0274924406097285	0.931910974569737	ENSMUSG00000111118
Pbxip1	668.132799581488	0.375410959628232	0.171269524931309	2.19193087491074	0.0283844983009893	0.934455628859843	ENSMUSG00000042613
Gm12919	8.97486759339549	1.02384713232867	0.467747656943667	2.188887784107	0.0286049971747094	0.934455628859843	ENSMUSG00000083220
Gm12791	119.532354867722	0.395317866401285	0.180671171914836	2.18805170859039	0.0286658359770779	0.934455628859843	ENSMUSG00000081121
Pink1	399.369929437647	0.38165003395133	0.174285047522688	2.18980365427877	0.0285384796088125	0.934455628859843	ENSMUSG00000028756
Zfp989	196.380056326569	-0.734608071248281	0.33403266088553	-2.19921030865908	0.027862971676222	0.934455628859843	ENSMUSG00000086147
Helq	624.627691770965	-0.169044748504936	0.0770542473930897	-2.19384075796055	0.0282468595628623	0.934455628859843	ENSMUSG00000035266
Tbxas1	112.095862848585	0.695803634632953	0.316490046800881	2.19850084281076	0.0279134345638122	0.934455628859843	ENSMUSG00000029925
Abcg2	98.0876643673277	-0.464342142740991	0.211840347293016	-2.19194383258217	0.0283835625426622	0.934455628859843	ENSMUSG00000029802
Uaca	24.5253173434696	0.592879830181027	0.270539719874583	2.1914705554359	0.0284177582329285	0.934455628859843	ENSMUSG00000034485
ENSMUSG00000112023	85.1556165035474	0.468813905155939	0.214257083915425	2.18809057132971	0.0286630055802485	0.934455628859843	ENSMUSG00000112023
ENSMUSG00000113510	134.410342711717	0.593998713413898	0.270248185534129	2.19797484390097	0.0279508986594115	0.934455628859843	ENSMUSG00000113510
Cdca4	1543.26977361957	-0.193130156695393	0.0881771059188394	-2.19025284038189	0.0285059049677985	0.934455628859843	ENSMUSG00000047832
Ptcd2	1408.42618244231	-0.140823656895086	0.064147511362504	-2.19530974630142	0.0281413862501109	0.934455628859843	ENSMUSG00000021650
Ube2e1	1360.86973466758	-0.187458077612328	0.0855181128226425	-2.1920277637686	0.0283775019655248	0.934455628859843	ENSMUSG00000021774
ENSMUSG00000116861	95.6900936138262	0.856153789196869	0.39107364790591	2.18923927444698	0.0285794534589498	0.934455628859843	ENSMUSG00000116861
Rpl7l1	4683.12656675959	-0.138505376885767	0.0634169266281459	-2.18404429621626	0.028958993258094	0.941932716833203	ENSMUSG00000063888
Gm13369	21.5726451957282	0.710594677673474	0.326970409643696	2.17326906874484	0.0297600720648336	0.945090288562145	ENSMUSG00000083796
Melk	1822.07476462223	-0.138555925400196	0.0635656247135941	-2.17973041285261	0.0292774507934951	0.945090288562145	ENSMUSG00000035683
Phc2	1575.89282011631	-0.178098901258582	0.081734980301246	-2.17898016983883	0.029333141381983	0.945090288562145	ENSMUSG00000028796
Gm2199	6.41248099234905	1.06946780560426	0.492090742086574	2.17331421653958	0.0297566762226322	0.945090288562145	ENSMUSG00000083829
Pcbp1	11372.658070746	-0.192372636562956	0.088497441815497	-2.17376494299148	0.0297227925879471	0.945090288562145	ENSMUSG00000051695
Ccdc90b	272.320586410791	-0.280997897266165	0.12878846599358	-2.18185607770319	0.029120156321177	0.945090288562145	ENSMUSG00000030613
Idh3a	4455.04176801897	-0.258202551011815	0.118743075297724	-2.17446407181576	0.0296703007966659	0.945090288562145	ENSMUSG00000032279
Pus10	1467.82215610803	-0.191292247258324	0.0879713509358064	-2.17448345652793	0.0296688464957798	0.945090288562145	ENSMUSG00000020280
C1qbp	10588.4231226566	-0.223981382316539	0.10276587936149	-2.17953063515041	0.0292922714112428	0.945090288562145	ENSMUSG00000018446
Gpr137b	54.3067204043287	-0.588786532177374	0.270327384517826	-2.17804989763642	0.0294023220970925	0.945090288562145	ENSMUSG00000021306
Tmem181b-ps	77.8329104507164	0.426686381042796	0.196318622425454	2.17343813730568	0.0297473570949791	0.945090288562145	ENSMUSG00000096780
Gm5915	81.7691798459745	0.697001121657472	0.321239348647362	2.16972523631468	0.0300276670740049	0.949504410453599	ENSMUSG00000080021
Stat2	2240.20792730135	0.274465493014403	0.126464065649228	2.17030420147716	0.0299838085510365	0.949504410453599	ENSMUSG00000040033
Coro2b	9.07265192066495	1.41357451597169	0.652032120623615	2.16795226992762	0.0301623182713663	0.951724260498433	ENSMUSG00000041729
Rps24-ps2	29.3461662125294	0.889266000561044	0.410920634508073	2.16408212652941	0.0304580469887816	0.952910974329104	ENSMUSG00000069125
Arhgef10l	7.77084109927815	1.26299573133232	0.583323566679276	2.16517179054201	0.0303745317949572	0.952910974329104	ENSMUSG00000040964
Ddit4	1891.67472669168	0.386066992044839	0.178282306704611	2.16548124814482	0.0303508499127713	0.952910974329104	ENSMUSG00000020108
Serpinb6b	568.377675497176	0.403651331073447	0.186496939473274	2.16438581894955	0.0304347512669693	0.952910974329104	ENSMUSG00000042842
Mx1	944.035578140761	0.695870134412558	0.321940569736887	2.1614863109091	0.0306577932650048	0.957132416795616	ENSMUSG00000000386
Pecr	384.109757582362	-0.211992192519202	0.0982324656230509	-2.15806649232122	0.0309226624770777	0.959977038436703	ENSMUSG00000026189
Irf6	7.83398890700594	0.968594886434457	0.448925580454571	2.15758452760407	0.0309601487243935	0.959977038436703	ENSMUSG00000026638
Gm11687	603.499232086064	0.412568299639273	0.191702138072959	2.15213196778356	0.0313869619881147	0.959977038436703	ENSMUSG00000082480
Dnajb4	218.574424374396	0.34690432136687	0.161559032539892	2.14722950436839	0.0317750149133854	0.959977038436703	ENSMUSG00000028035
Paics	5741.64905181907	-0.235138088948521	0.109456388255712	-2.1482354086012	0.0316950591441305	0.959977038436703	ENSMUSG00000029247
6530409C15Rik	22.6244877145498	0.613274453003695	0.284230617542959	2.15766499156624	0.0309538876878336	0.959977038436703	ENSMUSG00000043340
Parp12	144.661368736718	0.495907001339853	0.23048276152661	2.15160126534062	0.0314287723924166	0.959977038436703	ENSMUSG00000038507
Igkv1-88	68.0526697522614	0.352971242002599	0.164250019335592	2.14898752176958	0.0316353891119447	0.959977038436703	ENSMUSG00000076535
Creld1	249.109804512606	0.219974515717637	0.102245267624848	2.15143958080049	0.0314415198996258	0.959977038436703	ENSMUSG00000030284
Parp11	532.958059541147	0.180245142393427	0.0839500096267903	2.14705326651812	0.0317890412267589	0.959977038436703	ENSMUSG00000037997
Ppp2r1b	1246.64933846912	-0.174234687853073	0.0808479657625095	-2.15509056053293	0.0311547482465399	0.959977038436703	ENSMUSG00000032058
Prdm1	407.287284442314	0.517666519038038	0.24053214647176	2.15217186821561	0.0313838204363808	0.959977038436703	ENSMUSG00000038151
ENSMUSG00000036019	55.9807794432911	0.541873448395348	0.252219925549735	2.14841649490732	0.0316806835746514	0.959977038436703	ENSMUSG00000036019
Crip2	11.947109737535	0.812009199859918	0.37777839015951	2.14943263302345	0.0316001209383822	0.959977038436703	ENSMUSG00000006356
ENSMUSG00000116089	12.9567947642516	1.27153686836471	0.590249455250554	2.1542364114931	0.0312216367487722	0.959977038436703	ENSMUSG00000116089
St3gal6	690.772261252074	0.248211551371884	0.115414669851132	2.15060660565975	0.031507263502858	0.959977038436703	ENSMUSG00000022747
Ggn	6.47402862510801	1.13322391963635	0.529110655397583	2.14175221775646	0.0322134263107413	0.970807482307586	ENSMUSG00000031493
Slco4a1	188.633662615113	0.230601754936674	0.107753134977633	2.14009323241076	0.0323472329086036	0.972854558780753	ENSMUSG00000038963
Gm6142	183.404360246162	0.631325641553038	0.295207067839112	2.13858579394553	0.032469229038049	0.974538831717213	ENSMUSG00000084304
Klf13	934.736785331778	0.159666979987806	0.0747257877842585	2.13670520876651	0.0326219760905208	0.977137364966979	ENSMUSG00000052040
Dcun1d3	91.3203236709184	0.384884545487674	0.18026694977916	2.13508103376234	0.0327543915767638	0.979117612174234	ENSMUSG00000048787
Malat1	3901.90161422459	0.375238021740045	0.175827555839942	2.13412522256539	0.0328325317202718	0.979470698814654	ENSMUSG00000092341
Phf20-ps	12.7968188912532	0.76041859460806	0.356541432299128	2.13276361657203	0.0329441222888616	0.980818253708911	ENSMUSG00000098506
Iffo2	29.1922943086458	0.743477352449394	0.349025668880416	2.13015092796549	0.0331591548988303	0.985233884086573	ENSMUSG00000041025
Glmp	297.37899732603	0.206038351057433	0.0969557348153401	2.12507647381405	0.0335802322896274	0.988592987439952	ENSMUSG00000001418
Wdr3	3990.34270795718	-0.176847510654623	0.0831566760146968	-2.12667844760134	0.0334468094540976	0.988592987439952	ENSMUSG00000033285
Bcap29	2450.48324687361	-0.228392105241098	0.107490957082342	-2.12475645803526	0.0336069397775348	0.988592987439952	ENSMUSG00000020650
ENSMUSG00000114551	165.540252185328	0.393754429982153	0.185189688286329	2.12622221909761	0.0334847608754515	0.988592987439952	ENSMUSG00000114551
D030056L22Rik	1150.52617134986	-0.365144040671209	0.1716660906802	-2.12705980094486	0.0334151147726555	0.988592987439952	ENSMUSG00000047044
Phf11c	394.212333749872	0.338170069335595	0.159238452431584	2.12367091096221	0.0336976714307972	0.989291280355033	ENSMUSG00000091144
ENSMUSG00000110926	58.9434665883948	0.376961698048273	0.177643014856959	2.12201812917783	0.0338362156705896	0.991387692078565	ENSMUSG00000110926
Ifi214	579.616292678991	0.504012452095019	0.237808075806348	2.11940847839603	0.0340559609099954	0.99585024704535	ENSMUSG00000070501
Eif2ak2	3944.63297444232	0.406166160513343	0.191735089369759	2.11837156072176	0.0341436124484017	0.99644016803468	ENSMUSG00000024079
Mcrs1	844.570247022167	-0.14524939025415	0.0686208351492755	-2.11669516901359	0.0342857271159205	0.998614067693882	ENSMUSG00000037570
Gm15793	116.609804700326	0.61300160614848	0.290302549411633	2.11159566938311	0.0347211443291334	0.999468105864157	ENSMUSG00000082769
Epha2	100.411014319582	0.692792834070651	0.327847154641443	2.11315798921098	0.0345872476930497	0.999468105864157	ENSMUSG00000006445
Maff	164.0501873865	0.363965527512065	0.172202172653807	2.11359428224972	0.0345499346310091	0.999468105864157	ENSMUSG00000042622
ENSMUSG00000117165	1465.82942951517	0.396789489989964	0.187876519717518	2.1119695563158	0.0346890605943153	0.999468105864157	ENSMUSG00000117165
Gm14536	152.60587182002	-0.290148867324271	0.137290603171323	-2.1133920357404	0.0345672270687867	0.999468105864157	ENSMUSG00000094259
Gm7429	661.4705179813	0.650287542885112	0.307913029831651	2.11191953533325	0.0346933514935974	0.999468105864157	ENSMUSG00000082260
Gm15466	97.5641741897144	0.451531924690415	0.214601800762821	2.10404536721223	0.0353744897865342	0.999795148526748	ENSMUSG00000081657
Nupr1	96.7036234518315	0.571733702579798	0.271631536265532	2.10481341909028	0.035307552612623	0.999795148526748	ENSMUSG00000030717
Kbtbd11	81.098934618707	0.482930882293932	0.229261648232979	2.10646170441543	0.0351642662598408	0.999795148526748	ENSMUSG00000055675
Smim24	15.8830242392892	0.705869118276371	0.335340932636274	2.10492978810311	0.0352974202684286	0.999795148526748	ENSMUSG00000078439
Itgb3	1044.94270237614	0.386592579460558	0.183438705586	2.10747550919299	0.0350763824079182	0.999795148526748	ENSMUSG00000020689
Hid1	94.7558010786747	0.557241795818302	0.26421104895722	2.10907832211259	0.0349378216826767	0.999795148526748	ENSMUSG00000034586
Nr1d2	254.801535772421	-0.325111535931299	0.154411176640894	-2.10549225129858	0.0352484811191207	0.999795148526748	ENSMUSG00000021775
C2cd2	123.440475361408	0.242803634056773	0.115420521097356	2.10364354404508	0.0354095525617586	0.999795148526748	ENSMUSG00000045975
ENSMUSG00000117468	75.1516571030014	0.385622868027349	0.183039701659281	2.10677172510456	0.0351373715204967	0.999795148526748	ENSMUSG00000117468
ENSMUSG00000118327	159.579492489825	0.915337877280977	0.435010291062994	2.10417522547398	0.0353631647925338	0.999795148526748	ENSMUSG00000118327
Gm6085	19.0679182467851	0.813785325327217	0.407852472871057	1.99529334614209	0.04601089519132	0.999971315249418	ENSMUSG00000098104
Gm6123	23.8711458092833	0.115460370425734	0.273533813056645	0.422106390195439	0.672947363871351	0.999971315249418	ENSMUSG00000103922
Mrpl15	3059.07839967354	0.0529610263497803	0.158323365222515	0.334511752421042	0.737993424035779	0.999971315249418	ENSMUSG00000033845
ENSMUSG00000102275	18.0450031607065	0.355179302806671	0.606310714389722	0.585804100731049	0.558007167705426	0.999971315249418	ENSMUSG00000102275
Lypla1	1639.39186510199	-0.204624653747332	0.12205279860818	-1.67652570101427	0.0936352663588228	0.999971315249418	ENSMUSG00000025903
Tcea1	6605.28658334365	-0.172442569753035	0.122800887103182	-1.40424530979277	0.160245813724637	0.999971315249418	ENSMUSG00000033813
Gm6104	212.803291604156	0.28054039651877	0.17331789278704	1.61864647675746	0.105523349059233	0.999971315249418	ENSMUSG00000062588
Atp6v1h	1960.01841810578	-0.131739844350555	0.122995385918034	-1.07109582499581	0.284126345269653	0.999971315249418	ENSMUSG00000033793
Rb1cc1	1111.33560255903	-0.101999094435556	0.086782984211071	-1.17533518077089	0.239860644837321	0.999971315249418	ENSMUSG00000025907
4732440D04Rik	33.3705866600114	-0.417908407874672	0.205048923073495	-2.03809121067602	0.0415408119976076	0.999971315249418	ENSMUSG00000090031
Gm37108	172.928424387567	0.555714897406943	0.416000072558475	1.33585288576802	0.181597363017675	0.999971315249418	ENSMUSG00000102135
Pcmtd1	1122.77574352728	0.0954298816129296	0.0911323542365044	1.047156988453	0.295027179065948	0.999971315249418	ENSMUSG00000051285
Gm38372	8.22394207126381	0.0598611083035947	0.398554629205689	0.150195491200031	0.880610383046263	0.999971315249418	ENSMUSG00000103509
Gm9826	177.168092082478	0.00865803293687926	0.240793640400548	0.0359562358975805	0.971317255064629	0.999971315249418	ENSMUSG00000048538
Gm26901	34.64200182446	-0.283626890285657	0.291621651260785	-0.972585159776156	0.330759521238518	0.999971315249418	ENSMUSG00000097797
Gm15452	103.232235673886	0.0660373456798035	0.164813735877892	0.400678652953595	0.688656729420346	0.999971315249418	ENSMUSG00000084353
Rrs1	5917.11630504589	-0.19148685906491	0.109423473687172	-1.74996143526157	0.0801249684766553	0.999971315249418	ENSMUSG00000061024
Gm6161	6095.98860157602	0.0325346867957692	0.137436681760669	0.236724914913362	0.812870204950563	0.999971315249418	ENSMUSG00000081441
Mybl1	158.323433964323	0.0253950592580725	0.254896896550686	0.099628750297565	0.920639067940554	0.999971315249418	ENSMUSG00000025912
Vcpip1	1728.89476649228	-0.0292363876398969	0.155890561506058	-0.187544309016814	0.851233886369911	0.999971315249418	ENSMUSG00000045210
1700034P13Rik	6.47368011891347	0.25341892305702	0.556199348726473	0.455626069389099	0.648658893426481	0.999971315249418	ENSMUSG00000097893
Mcmdc2	8.78012390062887	0.352673412658604	0.520529741367358	0.677527880985592	0.49807108641794	0.999971315249418	ENSMUSG00000046101
Snhg6	1726.11271977967	0.0780321354833388	0.30502747048296	0.255820026175964	0.798089809679392	0.999971315249418	ENSMUSG00000098234
ENSMUSG00000093178	12.1053402688812	-0.369420943790205	0.507450598509208	-0.727993906944819	0.4666173161443	0.999971315249418	ENSMUSG00000093178
Cops5	3879.43084924477	-0.118010990039277	0.160214260613577	-0.73658230913607	0.461376396454917	0.999971315249418	ENSMUSG00000025917
Cspp1	770.994701328099	0.0706778781640723	0.177113196707518	0.399054838814686	0.689852797571566	0.999971315249418	ENSMUSG00000056763
Arfgef1	2688.0784938118	-0.0229486434489445	0.19014655905882	-0.120689238672185	0.903937182981871	0.999971315249418	ENSMUSG00000067851
Slco5a1	27.9004737996223	0.338499610477305	0.414063216960492	0.817507077692446	0.41363870623244	0.999971315249418	ENSMUSG00000025938
Ncoa2	496.412776354199	0.0344343111484124	0.254422508006654	0.135343022196416	0.892340671191963	0.999971315249418	ENSMUSG00000005886
Tram1	2931.88689424182	-0.0522081573530275	0.130746303977722	-0.399308858183276	0.689665640898602	0.999971315249418	ENSMUSG00000025935
Lactb2	1502.96961852659	-0.0361680638569361	0.0847434411799803	-0.42679484516237	0.66952876141227	0.999971315249418	ENSMUSG00000025937
Gm5523	14.67012183909	0.453619562957855	0.374173254906915	1.21232492437415	0.225388026652312	0.999971315249418	ENSMUSG00000097711
Eya1	38.0185042208468	0.0259514723371001	0.320098648611096	0.0810733580091738	0.935383613153639	0.999971315249418	ENSMUSG00000025932
Smt3h2-ps4	756.429681225376	-0.129130539431185	0.114455206662542	-1.12821900546571	0.259227439380685	0.999971315249418	ENSMUSG00000081201
Rpl5-ps1	7239.21037703936	-0.112710649519754	0.225199611857636	-0.500492201518563	0.616728545931617	0.999971315249418	ENSMUSG00000082193
Gm10566	89.0979461031799	0.157213690817114	0.225172192567545	0.698193187286901	0.485056386448447	0.999971315249418	ENSMUSG00000073737
Terf1	1395.25452483999	0.122370772444454	0.159749551267936	0.766016376717143	0.443666557860519	0.999971315249418	ENSMUSG00000025925
Rpl7	49753.6215206256	-0.0797786619042052	0.196177790641296	-0.40666510537922	0.684253972613962	0.999971315249418	ENSMUSG00000043716
Rdh10	166.047373569452	0.116473826547459	0.126209690948837	0.922859613012403	0.356080369832624	0.999971315249418	ENSMUSG00000025921
Stau2	635.475955547707	-0.151056425150672	0.116989986013409	-1.29119106940793	0.196637431084823	0.999971315249418	ENSMUSG00000025920
Ube2w	951.756915062859	-0.115972769209336	0.21080524724127	-0.550141757508549	0.582222147634338	0.999971315249418	ENSMUSG00000025939
Eloc	1836.12114683987	-0.00239628084423514	0.198822779940315	-0.0120523455358309	0.990383852381447	0.999971315249418	ENSMUSG00000079658
Tmem70	2144.10816787125	-0.116120587622904	0.201938183185138	-0.575030367171542	0.565270759554479	0.999971315249418	ENSMUSG00000025940
Ly96	77.7745434643407	-0.213293078093235	0.279548949315187	-0.762990090342819	0.445469305812117	0.999971315249418	ENSMUSG00000025779
Gm5828	7.96049961289185	0.352717609740201	0.514810110166486	0.685141186574861	0.493254832492998	0.999971315249418	ENSMUSG00000091020
Rbm6-ps1	21.749087845046	0.353119002757976	0.25632369643753	1.37762917617739	0.168317808111771	0.999971315249418	ENSMUSG00000101589
Gm10075	816.158409525671	0.140202265036133	0.184842825659819	0.758494491391073	0.448155009523534	0.999971315249418	ENSMUSG00000100720
ENSMUSG00000025927	16.3800942029599	-0.000419040607243262	0.357008217930619	-0.00117375619438738	0.999063478269393	0.999971315249418	ENSMUSG00000025927
Gm15795	8.09261405737148	0.920549782554902	0.482031682983105	1.90972878973013	0.0561681421325346	0.999971315249418	ENSMUSG00000090142
Mcm3	15125.8122224344	-0.0531616616015086	0.0876339693791824	-0.606633043991013	0.544094465845408	0.999971315249418	ENSMUSG00000041859
Paqr8	60.4335361034158	0.199802095689045	0.196950189756251	1.01448034112749	0.310353605316274	0.999971315249418	ENSMUSG00000025931
Tram2	169.227690314097	0.239365533887409	0.138690696915436	1.72589466497063	0.0843663647042627	0.999971315249418	ENSMUSG00000041779
Tmem14a	16.3636541455829	0.115345845818793	0.338455882353722	0.340800239655	0.73325397003144	0.999971315249418	ENSMUSG00000025933
Kcnq5	301.209651838625	-0.0469436712707157	0.251367924697019	-0.186752829850102	0.851854432463421	0.999971315249418	ENSMUSG00000028033
Gm7658	124.958081683512	0.1359141611597	0.272043004360461	0.499605426278898	0.617352936304918	0.999971315249418	ENSMUSG00000082935
Ogfrl1	1068.22828155407	0.253951363245057	0.1255136639024	2.02329655074471	0.0430425823048207	0.999971315249418	ENSMUSG00000026158
B3gat2	8.38354849727608	-0.201225204700142	0.416265040379544	-0.483406448249095	0.628807170582792	0.999971315249418	ENSMUSG00000026156
Smap1	1189.17233532531	0.194232720399371	0.242406107322002	0.801269912483517	0.422975405142715	0.999971315249418	ENSMUSG00000026155
Sdhaf4	100.36578724668	-0.124966661287605	0.268843986810475	-0.464829668575411	0.642053439612495	0.999971315249418	ENSMUSG00000026154
Fam135a	18.2726849937754	-0.422444053481328	0.326482588524998	-1.29392521478671	0.195691253975037	0.999971315249418	ENSMUSG00000026153
Tubb4b-ps2	16.1856141108113	0.544390890279207	0.42891329898817	1.26923294652662	0.204357993587565	0.999971315249418	ENSMUSG00000099997
Gm28439	51657.6421024312	-0.00642289407076341	0.2062721502822	-0.0311379605146709	0.975159516223982	0.999971315249418	ENSMUSG00000100131
Gm10222	6288.53740222185	-0.104385212876986	0.271222133854582	-0.384869816461783	0.700333869557694	0.999971315249418	ENSMUSG00000067736
Gm28438	12063.4780454514	-0.263391245599019	0.418474936087235	-0.629407457616799	0.529082336886177	0.999971315249418	ENSMUSG00000101939
Gm28437	49883.3989672306	-0.167013035107276	0.175912062613184	-0.949412067747305	0.342411075070252	0.999971315249418	ENSMUSG00000101111
Gm10925	136979.14509024	-0.149166514788037	0.266917552744484	-0.55884865290531	0.576265014905269	0.999971315249418	ENSMUSG00000100862
Gm28661	120966.635987766	-0.147461838730512	0.165078757021057	-0.893281736496856	0.371706315938037	0.999971315249418	ENSMUSG00000102070
Gm29216	109799.641211346	-0.0097689312836796	0.261815298612491	-0.0373123012117731	0.970235997374835	0.999971315249418	ENSMUSG00000101249
Lmbrd1	813.691849431224	-0.0404014365005335	0.0788335183617855	-0.512490592074324	0.608307702942755	0.999971315249418	ENSMUSG00000073725
Gm7846	718.828921512955	0.20110216091991	0.313697373187476	0.641070592579445	0.521476819417307	0.999971315249418	ENSMUSG00000086240
Gm5525	1054.90390982143	0.139215948338559	0.155048807913799	0.897884673940594	0.369247036222995	0.999971315249418	ENSMUSG00000099492
Phf3	3255.77941358161	0.122153149658909	0.227164752851252	0.537729326956348	0.590763929406582	0.999971315249418	ENSMUSG00000048874
ENSMUSG00000117310	27.2033906474903	0.0725782812836187	0.505931671205859	0.143454710219332	0.885931077230155	0.999971315249418	ENSMUSG00000117310
Gm19680	75.7490248225467	-0.0160874830103879	0.178239543312783	-0.0902576538930918	0.928082470049933	0.999971315249418	ENSMUSG00000070960
Gm37724	24.6602103203322	-0.253830763177475	0.427852137217662	-0.593267489156758	0.55300215260431	0.999971315249418	ENSMUSG00000102917
Gm7114	9.1863916209331	0.219923827869345	0.468039224506561	0.469883326768614	0.638438377116525	0.999971315249418	ENSMUSG00000100481
Prim2	1235.2277284059	-0.156775616746026	0.125420198639863	-1.25000293769426	0.211298474201342	0.999971315249418	ENSMUSG00000026134
1700001G17Rik	6.1851776938411	0.0498445963578956	0.543720209679398	0.0916732456703903	0.926957654722417	0.999971315249418	ENSMUSG00000103746
Rab23	216.532795145922	-0.00319212681661147	0.151879997239363	-0.0210174274073805	0.983231753685486	0.999971315249418	ENSMUSG00000004768
Bag2	517.122466464341	0.0115218061438782	0.142231061575416	0.0810076646848963	0.935435857003406	0.999971315249418	ENSMUSG00000042215
Zfp451	1169.15022286294	-0.0933897511220239	0.139356519064915	-0.670149855555171	0.502762265924851	0.999971315249418	ENSMUSG00000042197
Gm15455	45.1800681197516	0.105048198681803	0.196573432531851	0.534396725583872	0.593067083953721	0.999971315249418	ENSMUSG00000081402
Bend6	10.1707796934362	0.263613803349301	0.40212039582891	0.655559394857106	0.512107658842953	0.999971315249418	ENSMUSG00000042182
Dst	81.5465213401518	0.160741128890535	0.17848562171938	0.900583068496448	0.367810040258315	0.999971315249418	ENSMUSG00000026131
Ccdc115	2450.03548141757	-0.0206526388737578	0.188100234853068	-0.109795922848742	0.91257122459152	0.999971315249418	ENSMUSG00000042111
Imp4	1706.86703115379	0.0173038379192518	0.206266288149928	0.0838907708790215	0.933143277465968	0.999971315249418	ENSMUSG00000026127
Ptpn18	780.714035794779	0.142002618664997	0.409725859465508	0.346579585799737	0.728907184583105	0.999971315249418	ENSMUSG00000026126
Gm28417	74.0762620704671	0.060911937250276	0.270120199574283	0.225499378966382	0.821590808442993	0.999971315249418	ENSMUSG00000100280
4930568A12Rik	12.8526403161408	0.114943291638257	0.411772104960699	0.279142978005341	0.780135101764584	0.999971315249418	ENSMUSG00000101223
Arhgef4	52.1118805229464	-0.179481476122195	0.236597638328581	-0.75859369260878	0.448095646925406	0.999971315249418	ENSMUSG00000037509
Gm38336	9.95461100846233	0.285999772498448	0.420162196782131	0.680688968900144	0.496068317781066	0.999971315249418	ENSMUSG00000104002
Fam168b	3559.29440364893	0.0091736281324245	0.19655945082371	0.0466710101904595	0.962775435675657	0.999971315249418	ENSMUSG00000037503
Plekhb2	460.866074555055	0.0454394613261257	0.154390635397761	0.294314879973509	0.768517303354814	0.999971315249418	ENSMUSG00000026123
Gm37670	7.08707540709009	0.553539727829368	0.507369957580679	1.09099823424477	0.275273659561079	0.999971315249418	ENSMUSG00000103548
Hs6st1	587.7753756006	0.121183834913563	0.315600350820574	0.383978771248132	0.700994181769481	0.999971315249418	ENSMUSG00000045216
Uggt1	2802.32004856975	-0.00853535320943239	0.184986524007081	-0.0461404053903174	0.963198341441772	0.999971315249418	ENSMUSG00000037470
Neurl3	738.735685261735	-0.190680077502791	0.146898298687291	-1.29804142870776	0.194273099257771	0.999971315249418	ENSMUSG00000047180
Arid5a	3889.77821956239	0.172720480245411	0.157564036748391	1.09619227718329	0.272994638580855	0.999971315249418	ENSMUSG00000037447
Kansl3	1329.19636201601	0.0640617771910551	0.131559759158898	0.48694051737873	0.626300484662465	0.999971315249418	ENSMUSG00000010453
Lman2l	139.378781992222	0.0567071555931239	0.188683657583714	0.300540896436483	0.763764606494469	0.999971315249418	ENSMUSG00000001143
Cnnm4	165.168948314287	0.134801419042891	0.197672668580783	0.681942627732583	0.495275229433689	0.999971315249418	ENSMUSG00000037408
Cnnm3	195.860022777297	-0.246447826503636	0.158475695938224	-1.55511433500632	0.119918841485438	0.999971315249418	ENSMUSG00000001138
Ankrd23	6.39074975319491	-0.00491310582686103	0.479293322526806	-0.0102507287206912	0.991821245050804	0.999971315249418	ENSMUSG00000067653
Ankrd39	72.6804112158403	0.12454433112271	0.188003931391438	0.662455993345156	0.507679028878598	0.999971315249418	ENSMUSG00000079610
Cox5b	6973.48523616317	0.256173450983755	0.234299415273702	1.09335932693003	0.274236064118351	0.999971315249418	ENSMUSG00000061518
Actr1b	1441.36839255524	0.011641197810229	0.0867106503497808	0.134253379063238	0.893202217530046	0.999971315249418	ENSMUSG00000037351
Zap70	13.1541689088605	0.0853522656495561	0.410467408870023	0.207939202492404	0.835276438959519	0.999971315249418	ENSMUSG00000026117
Tmem131	3248.07977702978	0.119951719541605	0.197570297263346	0.607134378006824	0.543761737193533	0.999971315249418	ENSMUSG00000026116
Rpl12-ps1	118.655702394244	0.605834467888162	0.382760502477096	1.58280299029656	0.113466374954223	0.999971315249418	ENSMUSG00000080054
Vwa3b	7.41179767156268	0.251503830290473	0.464229398823223	0.54176627100311	0.587979529701041	0.999971315249418	ENSMUSG00000050122
Inpp4a	66.1448735132354	0.337893430554071	0.166769938098211	2.02610515064822	0.0427540104028491	0.999971315249418	ENSMUSG00000026113
Coa5	1170.82680136557	0.154184865040798	0.0981269651109049	1.57127925913672	0.116117796713717	0.999971315249418	ENSMUSG00000026112
Unc50	447.74574665887	-0.131936856922911	0.125744140516011	-1.04924854853265	0.294063739599152	0.999971315249418	ENSMUSG00000026111
Mgat4a	570.583101880408	-0.0156507638003532	0.174107962512295	-0.0898911432568628	0.928373719316065	0.999971315249418	ENSMUSG00000026110
4930594C11Rik	7.77067465760701	0.264824907769376	0.593627561496612	0.44611289122378	0.655515701318525	0.999971315249418	ENSMUSG00000103948
Tsga10	40.1640976199706	0.0822296648469241	0.221145293017226	0.371835473977368	0.710015349958152	0.999971315249418	ENSMUSG00000060771
Lipt1	75.5542143684325	0.00465609596794212	0.169338290833539	0.0274958247483382	0.978064269958068	0.999971315249418	ENSMUSG00000037216
Mitd1	1101.35641762396	-0.0208607133414072	0.119566597418413	-0.174469406939858	0.861496571734895	0.999971315249418	ENSMUSG00000026088
Mrpl30	1832.23396198224	0.0825065476169869	0.189874899754095	0.434531092439498	0.663902821431057	0.999971315249418	ENSMUSG00000026087
Txndc9	2746.32299198388	-0.0859408312277861	0.151916109159871	-0.565712429728865	0.571589284209782	0.999971315249418	ENSMUSG00000058407
Eif5b	34794.2783592166	0.337704914565379	0.437835974441559	0.771304630680718	0.4405263882536	0.999971315249418	ENSMUSG00000026083
Rev1	586.618729972767	0.0263329540935898	0.335358541934683	0.0785217932475346	0.937412995236962	0.999971315249418	ENSMUSG00000026082
Aff3	1635.54262095882	0.102133389053608	0.20596955676653	0.495866431219143	0.619988651473772	0.999971315249418	ENSMUSG00000037138
Chst10	673.469807579123	-0.0310235443201238	0.169526603999925	-0.183001036935403	0.854797205001008	0.999971315249418	ENSMUSG00000026080
Pdcl3	1225.90027609206	-0.00551714120344759	0.11305565588123	-0.0488002228676077	0.961078504565093	0.999971315249418	ENSMUSG00000026078
Gm37309	16.5366163862632	0.362491394057058	0.476524140569246	0.760698909448813	0.44683692634634	0.999971315249418	ENSMUSG00000103046
Rpl31	11030.1390585281	0.194520605451612	0.298371699110691	0.651940536020637	0.514439533607069	0.999971315249418	ENSMUSG00000073702
Tbc1d8	12.0739531612269	0.222110352890191	0.35244260276997	0.630202907209708	0.52856183743792	0.999971315249418	ENSMUSG00000003134
Cnot11	1548.1425555151	-0.01773363347793	0.11521201311331	-0.153921739571456	0.877671442670751	0.999971315249418	ENSMUSG00000003135
Gm15832	14.8382200443881	0.178373529192328	0.413271821124677	0.431613093549188	0.666022640436099	0.999971315249418	ENSMUSG00000085894
Rnf149	928.334722556969	-0.0430175769118406	0.19119196294385	-0.224996784642428	0.821981775623783	0.999971315249418	ENSMUSG00000048234
Map4k4	3514.84021305329	0.110887583407173	0.251381923210056	0.441112001973646	0.659131915077855	0.999971315249418	ENSMUSG00000026074
Il1r2	219.733774132293	0.385090208173782	0.188457309747072	2.0433816480274	0.0410146727287348	0.999971315249418	ENSMUSG00000026073
Gm16894	7.30337950730646	0.322198353885076	0.60308148705065	0.534253431423964	0.593166206465886	0.999971315249418	ENSMUSG00000097899
Mrps9	4214.84608559041	0.0256801344005628	0.187680807951919	0.136828771576589	0.891166141095741	0.999971315249418	ENSMUSG00000060679
Gpr45	6.47846356137922	-0.0381228685058709	0.456196509790838	-0.0835667693366392	0.933400888716	0.999971315249418	ENSMUSG00000041907
Tgfbrap1	272.704184478749	-0.0367818735592713	0.277878235400259	-0.132366874671888	0.894694114277006	0.999971315249418	ENSMUSG00000070939
AI597479	481.646642600984	-0.0770450212018336	0.182628179296711	-0.421868199631233	0.67312122259739	0.999971315249418	ENSMUSG00000010290
Gm8210	1080.66958476496	0.337984148698797	0.240105417019398	1.40764899390625	0.159235032188585	0.999971315249418	ENSMUSG00000094497
Nck2	301.154117342669	-0.0244292143734831	0.242973984654862	-0.10054251037692	0.919913635397563	0.999971315249418	ENSMUSG00000066877
Uxs1	858.721756172435	-0.032644328358784	0.0999213479934444	-0.326700239881929	0.743894618798094	0.999971315249418	ENSMUSG00000057363
Tpp2	3725.75622474924	-0.0891536353372102	0.141538174591413	-0.629891091887936	0.528765841545585	0.999971315249418	ENSMUSG00000041763
Gm8251	17.4734169360634	0.154889643145011	0.537195505041182	0.288330117604273	0.773094055080509	0.999971315249418	ENSMUSG00000091844
Tex30	950.530167159489	-0.186949713330316	0.199426850429382	-0.937435019044818	0.348534834594843	0.999971315249418	ENSMUSG00000026049
Poglut2	158.969704604694	-0.0512829143512537	0.143705527900964	-0.356861111053402	0.721195784178526	0.999971315249418	ENSMUSG00000026047
Bivm	75.1527981561459	0.355016083716907	0.194208062621167	1.82801928470612	0.0675466574386312	0.999971315249418	ENSMUSG00000041684
Ercc5	630.22736078696	0.255810832316267	0.221423043933078	1.1553035662972	0.247966136055295	0.999971315249418	ENSMUSG00000026048
Txn-ps1	11.5854769700047	0.798174567403052	0.398510801696255	2.00289318132817	0.0451887551396349	0.999971315249418	ENSMUSG00000101567
Wdr75	3443.0023949211	-0.219148825950378	0.123154529871028	-1.77946216172381	0.0751640230593767	0.999971315249418	ENSMUSG00000025995
Gm5526	873.505778510742	0.280490361848771	0.220317008932249	1.27312168592043	0.20297486476905	0.999971315249418	ENSMUSG00000084817
ENSMUSG00000101337	6.29685005855214	-0.000471257319342346	0.63592105776259	-0.000741062610822178	0.999408717638356	0.999971315249418	ENSMUSG00000101337
Slc39a10	626.884571901115	0.0604866561121198	0.343999706562689	0.175833452640161	0.860424787655368	0.999971315249418	ENSMUSG00000025986
Gm28151	28.2081269303415	0.101674080867661	0.295129375360594	0.34450681415035	0.730465172373832	0.999971315249418	ENSMUSG00000100213
Gm4852	47.4386624994044	0.349493795747906	0.304503477302085	1.14774976904841	0.251071879038909	0.999971315249418	ENSMUSG00000081185
Gm8337	8.73513473765987	-0.00762640826926879	0.506046977676495	-0.0150705539321375	0.987975892852257	0.999971315249418	ENSMUSG00000100033
Nabp1	5226.80297419951	0.0393705140101327	0.208438041859399	0.188883534209604	0.850184099074842	0.999971315249418	ENSMUSG00000026107
ENSMUSG00000099413	449.963124597654	0.24992967202383	0.14593882695135	1.71256462207378	0.0867926664815073	0.999971315249418	ENSMUSG00000099413
Stat4	1403.57169315151	0.0651100455014638	0.139719147914207	0.466006603056611	0.64121077416369	0.999971315249418	ENSMUSG00000062939
Gm3940	30.5134148605361	0.136416926704946	0.273993970669643	0.497882951115829	0.61856654459048	0.999971315249418	ENSMUSG00000078291
ENSMUSG00000109599	8.86527848829239	0.00617975878596115	0.464013935745451	0.0133180456660923	0.989374051105248	0.999971315249418	ENSMUSG00000109599
Stat1	2768.66101797122	0.00241453181271342	0.207267469849974	0.0116493524741781	0.990705371742971	0.999971315249418	ENSMUSG00000026104
Gls	5004.77235676482	-0.186662810458584	0.19269917095781	-0.968674693984293	0.332707522549592	0.999971315249418	ENSMUSG00000026103
Nab1	6298.81053793624	-0.0864127875665458	0.12049555523637	-0.717145021631997	0.473284618454833	0.999971315249418	ENSMUSG00000002881
Gm5527	419.539515386633	0.0103502851565575	0.118298582122336	0.0874928927369048	0.93027973454288	0.999971315249418	ENSMUSG00000100007
Nemp2	481.079223111224	0.0161015917571361	0.145230852972341	0.110868947111415	0.911720270371826	0.999971315249418	ENSMUSG00000043015
Mfsd6	169.993573819044	0.265698496490993	0.195476727597955	1.35923339701832	0.174072641566867	0.999971315249418	ENSMUSG00000041439
Hibch	678.287491508106	-0.0854083041915111	0.0870614368067247	-0.981011884528353	0.32658688090537	0.999971315249418	ENSMUSG00000041426
1700019D03Rik	8.84503564992021	-0.441093877653902	0.526412340277412	-0.837924653174832	0.402073021815157	0.999971315249418	ENSMUSG00000043629
Pms1	763.394663140928	-0.0869610768710107	0.0927974835384388	-0.937105981273614	0.348704045044055	0.999971315249418	ENSMUSG00000026098
Ormdl1	715.741242364829	-0.243850612281772	0.142295400056051	-1.71369286839713	0.086585147361284	0.999971315249418	ENSMUSG00000026097
Osgepl1	292.459687237717	-0.0159770205370617	0.0955556377459416	-0.167201233898313	0.867211713576318	0.999971315249418	ENSMUSG00000026096
Asnsd1	205.098349953876	-0.102884427946432	0.308784856265224	-0.333191300865032	0.738989884243535	0.999971315249418	ENSMUSG00000026095
Stk17b	3218.02577632779	-0.0934143744377446	0.139776799925975	-0.668311010748679	0.503935086311794	0.999971315249418	ENSMUSG00000026094
Ccdc150	12.5422622953449	-0.0243201543561705	0.306104985529971	-0.0794503699901001	0.936674405770605	0.999971315249418	ENSMUSG00000025983
Gtf3c3	674.425872734998	-0.057460685942779	0.103730799622018	-0.553940451169357	0.579619600134261	0.999971315249418	ENSMUSG00000041303
Pgap1	144.719577694847	0.028287918220757	0.165518366955674	0.170905010368623	0.86429845692431	0.999971315249418	ENSMUSG00000073678
Ankrd44	879.571335096234	0.036510295940344	0.157596552395675	0.231669382263376	0.816794813864334	0.999971315249418	ENSMUSG00000052331
Sf3b1	15391.8812473218	-0.127068001492575	0.133953106490388	-0.948600632130121	0.342823769386393	0.999971315249418	ENSMUSG00000025982
Coq10b	184.249812302423	-0.193433615448452	0.18596407090096	-1.04016660052291	0.298262505762491	0.999971315249418	ENSMUSG00000025981
Hspd1	46192.661250727	-0.200053993381502	0.102191025103963	-1.95764738809478	0.0502714027178073	0.999971315249418	ENSMUSG00000025980
Hspe1	38978.5051101432	0.128344657844566	0.307044172396845	0.41800063112315	0.675946655787567	0.999971315249418	ENSMUSG00000073676
Mob4	1214.72196598774	-0.0233461908851658	0.168076319901702	-0.138902320676819	0.889527337112111	0.999971315249418	ENSMUSG00000025979
Rftn2	88.8624182329897	0.0123697502106153	0.181280738244935	0.0682353256632378	0.945598306679003	0.999971315249418	ENSMUSG00000025978
Mars2	538.584213745873	-0.16489921251173	0.152660582334491	-1.08016889487833	0.280066976965716	0.999971315249418	ENSMUSG00000046994
Boll	15.4791100416196	-0.50249749880305	0.409162655194575	-1.22811183382337	0.219404989291266	0.999971315249418	ENSMUSG00000025977
Gm8292	20.4332224990229	0.11619665020092	0.439718681188051	0.264252248476172	0.791585552949662	0.999971315249418	ENSMUSG00000100215
Plcl1	9.25099581397454	0.576309634134493	0.536127092133027	1.07494965762987	0.282397267851707	0.999971315249418	ENSMUSG00000038349
Gm38056	231.090574392939	0.165989591830171	0.331184555207859	0.501199676192606	0.616230602172589	0.999971315249418	ENSMUSG00000102145
4930558J18Rik	46.5007396269839	0.229453004726715	0.178091580371785	1.28839894759599	0.197607124905393	0.999971315249418	ENSMUSG00000097519
1700066M21Rik	256.426726119774	-0.203512754422433	0.147007212017144	-1.38437258709933	0.166244398273154	0.999971315249418	ENSMUSG00000038323
Tyw5	479.304119214363	-0.168657084346486	0.217733301118991	-0.774603992497754	0.438573697408618	0.999971315249418	ENSMUSG00000048495
Maip1	671.46340451712	-0.00105075204286369	0.217936152357572	-0.00482137557948488	0.996153113767206	0.999971315249418	ENSMUSG00000025971
Kctd18	410.541654881265	0.15398026752856	0.13837396396866	1.11278352597773	0.265801412347631	0.999971315249418	ENSMUSG00000054770
Sgo2a	314.699495776417	0.145190942810546	0.0902494587152349	1.60877355806275	0.107665864707987	0.999971315249418	ENSMUSG00000026039
Gm37607	26.6109606596806	0.238779591665637	0.438167181309806	0.544950881423517	0.585787300243967	0.999971315249418	ENSMUSG00000103839
Clk1	3455.44259732803	-0.00218303902835912	0.175397236917831	-0.0124462566612826	0.990069580356569	0.999971315249418	ENSMUSG00000026034
Ppil3	761.734585550375	-0.0351928472426152	0.145765657264853	-0.241434422229308	0.809218436596647	0.999971315249418	ENSMUSG00000026035
Nif3l1	506.244567946487	-0.149871810108223	0.08117030396695	-1.84638719807242	0.06483600470784	0.999971315249418	ENSMUSG00000026036
Orc2	2624.73728031385	-0.125351875008115	0.125143550833818	-1.00166468166286	0.316505569947307	0.999971315249418	ENSMUSG00000026037
ENSMUSG00000094245	10.0288255021388	0.403177122782806	0.415886826478518	0.969439513621217	0.332325945479864	0.999971315249418	ENSMUSG00000094245
Gm15834	16.3879621924184	0.714116805124027	0.578254208129776	1.23495306231089	0.216847973457688	0.999971315249418	ENSMUSG00000085054
Fam126b	184.499867227125	-0.156606149483988	0.16805529295435	-0.931872758845677	0.351402287294664	0.999971315249418	ENSMUSG00000038174
Ndufb3	965.537399665135	0.0718427713818141	0.29457597721556	0.24388537062967	0.8073195996774	0.999971315249418	ENSMUSG00000026032
Cbx3-ps7	928.413610498292	0.0514954732121095	0.19180749887951	0.268474765131358	0.788333896600652	0.999971315249418	ENSMUSG00000059647
Gm20257	74.8143368633336	0.248412528467763	0.270416811078596	0.918628274170286	0.358290037843843	0.999971315249418	ENSMUSG00000102059
Cflar	5823.99577010082	0.14107646099248	0.10716078702333	1.31649332662857	0.188008516798224	0.999971315249418	ENSMUSG00000026031
Casp8	4035.97337058444	-0.0346650826070327	0.205813420697277	-0.168429650941084	0.86624528322108	0.999971315249418	ENSMUSG00000026029
Gm37760	29.5576913663642	0.105548891650318	0.488725508148617	0.215967633959104	0.829012976559056	0.999971315249418	ENSMUSG00000102719
Gm28802	12.0272597366857	0.0467805608224525	0.363714560490676	0.128618883883401	0.897659223244094	0.999971315249418	ENSMUSG00000099719
Trak2	1491.45302851499	-0.0151397193645914	0.247575354714922	-0.0611519647503865	0.951238184666943	0.999971315249418	ENSMUSG00000026028
Stradb	194.777457379127	0.0465555565008822	0.1542621262797	0.301795117334698	0.762808253233989	0.999971315249418	ENSMUSG00000026027
Tmem237	128.858298571589	0.0899596716314448	0.230511449502166	0.390261185835802	0.696343421498128	0.999971315249418	ENSMUSG00000038079
G730003C15Rik	6.47338072959188	0.135018205900601	0.447093258911873	0.301991146610454	0.762658812045334	0.999971315249418	ENSMUSG00000097573
Als2	424.568915075928	0.15009443211846	0.181571494131863	0.826640948437956	0.408440600678437	0.999971315249418	ENSMUSG00000026024
Fzd7	56.732379430097	0.669496407197883	0.499722043515256	1.33973759189881	0.180330671455357	0.999971315249418	ENSMUSG00000041075
Sumo1	3510.59806120661	0.0695295495071684	0.160470903981829	0.433284463300845	0.664808123905305	0.999971315249418	ENSMUSG00000026021
D430013B06Rik	7.31011036400371	0.583718650091586	0.552620571008843	1.05627383545634	0.290843126116383	0.999971315249418	ENSMUSG00000103821
Nop58	31627.5590078083	0.108001538068571	0.306236838367374	0.352673240242273	0.724333423093766	0.999971315249418	ENSMUSG00000026020
Bmpr2	37.9347107634661	0.113488984179206	0.239495409989579	0.473867053168761	0.635594715001625	0.999971315249418	ENSMUSG00000067336
Fam117b	685.349352776802	-0.0881718437354283	0.186607049189573	-0.472500069629496	0.636569892048144	0.999971315249418	ENSMUSG00000041040
Wdr12	3647.45480044832	-0.0975400541238244	0.122031067203604	-0.799305097947578	0.424113523575344	0.999971315249418	ENSMUSG00000026019
Carf	102.377039744964	0.0644700719522337	0.169663841380671	0.379987105252342	0.703954987046359	0.999971315249418	ENSMUSG00000026017
Nbeal1	87.1234863676872	0.24739563999204	0.261993153302697	0.944282844316197	0.345025130320321	0.999971315249418	ENSMUSG00000073664
Cyp20a1	322.108372361754	-0.23843084914774	0.179968996522777	-1.32484402177329	0.185222890523475	0.999971315249418	ENSMUSG00000049439
Abi2	83.2392450667825	-0.136076557600735	0.242201227119299	-0.561832651383345	0.574230043551727	0.999971315249418	ENSMUSG00000026782
Raph1	35.4987509830588	0.651532808163091	0.319716977624487	2.0378423848618	0.0415656980482536	0.999971315249418	ENSMUSG00000026014
Gm11575	26.0378892348916	0.427944434714623	0.393457696584871	1.08765043466957	0.276749456687469	0.999971315249418	ENSMUSG00000081562
Eif4a-ps4	7121.12143497218	-0.139466809714588	0.100197921327326	-1.39191320405718	0.163948682915774	0.999971315249418	ENSMUSG00000101188
Cd28	6.80740523994171	0.644228250611255	0.569347473681994	1.13152034634492	0.257836144692916	0.999971315249418	ENSMUSG00000026012
Rpl18-ps1	73.249043935312	0.540255055552012	0.268909209989824	2.00906118303816	0.044530645590453	0.999971315249418	ENSMUSG00000081382
Pard3b	62.2751392479343	-0.247775940727876	0.220423321279158	-1.12409131343265	0.260974290029126	0.999971315249418	ENSMUSG00000052062
Gm11599	27.9199641421714	0.236490425523743	0.290324928549425	0.814571544735549	0.415317603974473	0.999971315249418	ENSMUSG00000084333
Nrp2	755.078340948991	0.0464885867544293	0.178788406385581	0.260020141653762	0.794848237035393	0.999971315249418	ENSMUSG00000025969
Ino80d	716.823338921932	0.133854316822462	0.123749825779326	1.08165256782789	0.279406936811253	0.999971315249418	ENSMUSG00000040865
Ino80dos	37.2950280116373	0.0323866963203523	0.282686035368193	0.114567726269779	0.908787761928258	0.999971315249418	ENSMUSG00000084799
Gm20342	43.0057307646119	0.0848436318839544	0.297138417697621	0.2855357194851	0.775233742687528	0.999971315249418	ENSMUSG00000101599
Ndufs1	2662.88576502258	-0.168800951860658	0.145547162874817	-1.15976806779697	0.246143248326821	0.999971315249418	ENSMUSG00000025968
Eef1b2	71798.0622663616	0.117599708698718	0.329451503932807	0.356956053606915	0.721124705402194	0.999971315249418	ENSMUSG00000025967
Snora41	64.5502754885544	0.0996691158759373	0.253568349634646	0.393066074766608	0.694270680030589	0.999971315249418	ENSMUSG00000064602
Gm11605	339.865719545462	0.273853406364621	0.212602863993962	1.28809838785802	0.197711716465843	0.999971315249418	ENSMUSG00000081643
Klf7	420.223886664564	0.169310128352655	0.146188560815808	1.15816263193109	0.24679767458453	0.999971315249418	ENSMUSG00000025959
Creb1	3901.04722421412	-0.0245077753338363	0.0810258098833295	-0.302468748774316	0.762294753293466	0.999971315249418	ENSMUSG00000025958
Mettl21a	237.524517099145	-0.0831734897122647	0.12385985929129	-0.671512870983163	0.501893862834574	0.999971315249418	ENSMUSG00000025956
2810408I11Rik	156.063617578165	0.00767154416454632	0.418268877377264	0.018341178556364	0.985366677246326	0.999971315249418	ENSMUSG00000087213
Ccnyl1	204.063647566683	0.0451793376934828	0.136990216876215	0.329799738431739	0.741551285029758	0.999971315249418	ENSMUSG00000070871
Fzd5	159.95468112452	0.197345107669521	0.158654012787286	1.24387088736362	0.213547085564135	0.999971315249418	ENSMUSG00000045005
Plekhm3	383.860787243151	0.0674424509873163	0.255760066497841	0.26369421900305	0.792015550486944	0.999971315249418	ENSMUSG00000051344
Rpl10a-ps1	11397.0385681326	-0.0938080206774925	0.289578576755552	-0.323946687384546	0.745978396776844	0.999971315249418	ENSMUSG00000084416
Idh1	418.467350357408	-0.129505576459289	0.216042947975107	-0.599443664665281	0.548877066611484	0.999971315249418	ENSMUSG00000025950
Pikfyve	1253.79706460669	-0.09457002051876	0.166192850957365	-0.569037837512161	0.56933046235995	0.999971315249418	ENSMUSG00000025949
Map2	40.263892183597	-0.123184104360446	0.320816292142289	-0.383970849914975	0.701000052915449	0.999971315249418	ENSMUSG00000015222
Rpe	2157.49877855722	-0.124090038290332	0.136737097452326	-0.907508208104214	0.364138110894846	0.999971315249418	ENSMUSG00000026005
Kansl1l	70.1682635890197	0.0748500373263313	0.229920108474605	0.325548025455105	0.744766341247518	0.999971315249418	ENSMUSG00000026004
Acadl	3669.36622780436	-0.0189762191541016	0.11718827990491	-0.161929325778137	0.871361508944569	0.999971315249418	ENSMUSG00000026003
Rpl31-ps14	26.5629178118701	0.525497788048745	0.442183954877116	1.18841441950281	0.234670178233101	0.999971315249418	ENSMUSG00000094191
Lancl1	267.392626457675	-0.133153805835561	0.12676801296509	-1.05037385000449	0.293546263608394	0.999971315249418	ENSMUSG00000026000
Bard1	301.153707078836	0.00186527038577181	0.143511520903622	0.0129973564075352	0.989629901964309	0.999971315249418	ENSMUSG00000026196
Atic	8079.04724207064	-0.189958004416605	0.168871520803388	-1.12486702028204	0.260645389081941	0.999971315249418	ENSMUSG00000026192
Gm5256	6.32598255193693	-0.163244274585277	0.488956187142566	-0.333862785414921	0.73848310297183	0.999971315249418	ENSMUSG00000100319
Mreg	1100.68418545465	-0.0824870601849093	0.220449987576397	-0.374175844107605	0.708273494444452	0.999971315249418	ENSMUSG00000039395
Smarcal1	774.057122442358	0.056317989005842	0.116932669962297	0.481627495754615	0.630070590086564	0.999971315249418	ENSMUSG00000039354
Rpl37a	4718.85050821694	-0.0162101392613361	0.357649520448293	-0.0453240905818008	0.963848985659138	0.999971315249418	ENSMUSG00000046330
Tns1	85.5177699038107	0.0799508167188027	0.174785544086226	0.457422363713106	0.64736749304741	0.999971315249418	ENSMUSG00000055322
Arpc2	21954.450448324	-0.0845226918168969	0.0901296092621294	-0.937790505349628	0.348352081410043	0.999971315249418	ENSMUSG00000006304
Aamp	4789.65603922929	0.0394758941370629	0.10754566561219	0.367061693396488	0.713573000137736	0.999971315249418	ENSMUSG00000006299
Pnkd	243.162926771404	0.18640492550231	0.177817318669736	1.04829454688001	0.294502921278343	0.999971315249418	ENSMUSG00000026179
Ctdsp1	1384.54253072641	0.0395980424702601	0.0958434298309543	0.413153437226755	0.679494200242222	0.999971315249418	ENSMUSG00000026176
Usp37	906.442146202428	0.00619839711208108	0.160722385068472	0.0385658606885431	0.969236521256468	0.999971315249418	ENSMUSG00000033364
Cnot9	1390.78380950308	-0.129418103769044	0.0984534163378363	-1.31451105084007	0.188674281704379	0.999971315249418	ENSMUSG00000026174
Plcd4	6.45543245237755	-0.767059757809269	0.585823590250577	-1.30936986931709	0.19040909271098	0.999971315249418	ENSMUSG00000026173
Zfp142	361.131140217719	0.187689088223735	0.394991627106391	0.475172320989936	0.634664153981891	0.999971315249418	ENSMUSG00000026135
Bcs1l	344.916704906632	-0.117223439954751	0.17027624840813	-0.688430952940551	0.491181437400342	0.999971315249418	ENSMUSG00000026172
Rnf25	481.698472096308	0.00458830479972531	0.124101861740911	0.0369720867629236	0.970507262054493	0.999971315249418	ENSMUSG00000026171
Ttll4	823.414462506488	-0.0408930361498157	0.135387680108863	-0.302043997776861	0.762618522938824	0.999971315249418	ENSMUSG00000033257
Nhej1	52.6435693440659	0.13143469014396	0.250366393206307	0.524969379718848	0.599604477303037	0.999971315249418	ENSMUSG00000026162
Cnppd1	1232.26105379344	0.109511881240354	0.1287130246817	0.850822063355056	0.394868203563415	0.999971315249418	ENSMUSG00000033159
Retreg2	1039.22577763379	-0.127815253678216	0.0732154843911057	-1.74574073696552	0.0808560129737337	0.999971315249418	ENSMUSG00000049339
Zfand2b	879.742424303891	0.186622168908294	0.245876518040263	0.759007693763314	0.447847954399791	0.999971315249418	ENSMUSG00000026197
Abcb6	29.4821560691352	0.0154083114553698	0.241902768024898	0.0636963007127887	0.94921205037086	0.999971315249418	ENSMUSG00000026198
Atg9a	65.153204192338	0.136356676218726	0.549718196615768	0.248048321955101	0.804097019293256	0.999971315249418	ENSMUSG00000033124
Ankzf1	612.277183929359	0.0770012649758035	0.14150607975965	0.544155170622996	0.586334697855674	0.999971315249418	ENSMUSG00000026199
Glb1l	36.9078000370291	-0.0867052437498581	0.279028892430664	-0.310739303713516	0.755998815314453	0.999971315249418	ENSMUSG00000026200
Stk16	496.664982069677	-0.0653938985776319	0.160714223814073	-0.406895525646099	0.684084722358393	0.999971315249418	ENSMUSG00000026201
Tuba4a	5029.96724631989	0.0575838948986805	0.282084723716648	0.204136878239897	0.838246536394409	0.999971315249418	ENSMUSG00000026202
Dnajb2	415.499568696708	0.201261838789143	0.17184702403961	1.17116860134135	0.241531013466805	0.999971315249418	ENSMUSG00000026203
Dnpep	666.969924595997	-0.0407053961639202	0.0948374891667955	-0.429212081862792	0.667768891321038	0.999971315249418	ENSMUSG00000026209
Gmppa	423.899911120764	0.10302175449747	0.118708649728837	0.867853814636083	0.385474365361265	0.999971315249418	ENSMUSG00000033021
Chpf	202.318909605786	0.0587251954844384	0.123663803805431	0.474877803183501	0.634874073393809	0.999971315249418	ENSMUSG00000032997
Stk11ip	556.55781047162	-0.140062581919425	0.178901770117243	-0.782902158137591	0.433684570089615	0.999971315249418	ENSMUSG00000026213
Sgpp2	13.3294266807564	-0.0124940264996586	0.392831276297483	-0.0318050706588777	0.974627502882655	0.999971315249418	ENSMUSG00000032908
Farsb	2783.71420497352	-0.151295358749766	0.0892789885620215	-1.6946356716918	0.090144555726842	0.999971315249418	ENSMUSG00000026245
Acsl3	2718.20380404956	-0.170970082357	0.103977003513732	-1.64430668878067	0.100112868393824	0.999971315249418	ENSMUSG00000032883
Utp14b	848.944875310229	0.0147347434965068	0.1855018822134	0.0794317735253816	0.936689196856563	0.999971315249418	ENSMUSG00000079470
Gm6159	289.980384216516	0.00537078974325111	0.167675968556801	0.0320307661824046	0.974447515614058	0.999971315249418	ENSMUSG00000099377
Gm5830	14.7929620500908	0.551534866319176	0.430252359539759	1.28188690681244	0.199882321624309	0.999971315249418	ENSMUSG00000072978
Ap1s3	1162.96570404862	-0.033447112751171	0.138357650263533	-0.241743862283463	0.808978640162099	0.999971315249418	ENSMUSG00000054702
Wdfy1	2347.80339649908	0.191397800790161	0.176431802090715	1.08482596970671	0.277998741133457	0.999971315249418	ENSMUSG00000073643
Mrpl44	880.536365985382	-0.0183947261905392	0.146529772675914	-0.125535758737739	0.900099417563262	0.999971315249418	ENSMUSG00000026248
Gm5529	190.751199563025	-0.0261266078273381	0.181442405483341	-0.143993945394077	0.885505250687357	0.999971315249418	ENSMUSG00000067106
Cul3	5386.44563415889	-0.0752168165418957	0.154413710776983	-0.487112291799851	0.626178756132888	0.999971315249418	ENSMUSG00000004364
Dock10	12555.8878679386	-0.0526536175151917	0.151210524872128	-0.348213972272885	0.727679495293039	0.999971315249418	ENSMUSG00000038608
ENSMUSG00000102721	10.8686504438982	0.236260187453563	0.674456096923712	0.3502973559453	0.726115549368139	0.999971315249418	ENSMUSG00000102721
Rhbdd1	211.977893414563	0.0705250195420075	0.224044306141511	0.314781574933051	0.752927502171587	0.999971315249418	ENSMUSG00000026142
Mff	1623.0377691089	-0.0923374860173099	0.0678092464370445	-1.36172411387933	0.173284968204388	0.999971315249418	ENSMUSG00000026150
Agfg1	3100.21819850244	-0.136845064410634	0.123436889874685	-1.10862372301799	0.26759253974548	0.999971315249418	ENSMUSG00000026159
Trip12	4499.25534934555	0.0797824080275329	0.211916829627804	0.376479811290389	0.706560221630873	0.999971315249418	ENSMUSG00000026219
Fbxo36	20.2258760463501	-0.322079005128574	0.336887008332456	-0.956044600006454	0.339049702109149	0.999971315249418	ENSMUSG00000073633
ENSMUSG00000118590	130.551859094925	-0.0919240959325314	0.445534168588179	-0.206323335926901	0.83653835123288	0.999971315249418	ENSMUSG00000118590
Gm29284	7.23961956820956	-0.53914472270766	0.496731812678798	-1.08538392135615	0.277751650653016	0.999971315249418	ENSMUSG00000099693
C130026I21Rik	1611.57407288679	0.100456747672179	0.148349527147088	0.677162574118463	0.498302810670434	0.999971315249418	ENSMUSG00000052477
Rpl19-ps1	233.152685819484	0.0533185102185545	0.294465483076079	0.181068795098062	0.85631357761435	0.999971315249418	ENSMUSG00000064281
ENSMUSG00000118640	35.0502419038658	-0.0675137502820827	0.308262312928237	-0.219013961326501	0.82663917221019	0.999971315249418	ENSMUSG00000118640
Gm7582	59.1153567905091	0.242193267202806	0.23135558672702	1.04684425662292	0.295171414878353	0.999971315249418	ENSMUSG00000061852
Gm2389	11.8827054973937	0.954827589727372	0.517109391498492	1.8464711827423	0.0648238198678991	0.999971315249418	ENSMUSG00000089976
Gm18342	70.5008956967595	0.399915587145946	0.247058639488269	1.61870715379267	0.105510286936792	0.999971315249418	ENSMUSG00000101279
A530032D15Rik	1613.16664189935	0.154268840291661	0.256922075890262	0.600449921467837	0.548206426174374	0.999971315249418	ENSMUSG00000089844
Gm10553	132.221276179369	-0.0853291381188377	0.143618504607356	-0.594137491906924	0.552420156545412	0.999971315249418	ENSMUSG00000073631
A530040E14Rik	1802.21960712772	0.0856329039306158	0.174242277673266	0.491458818572105	0.623101971952113	0.999971315249418	ENSMUSG00000072109
Gm7592	34.9294156543672	0.001910861146521	0.308243496255391	0.00619919372098539	0.995053790721093	0.999971315249418	ENSMUSG00000090186
Gm6264	291.731926208563	0.253325586802198	0.181929810477122	1.39243583081759	0.163790460573627	0.999971315249418	ENSMUSG00000089716
Gm7609	69.0104318114216	0.169458500085013	0.353724360194191	0.479069352170097	0.631889291916874	0.999971315249418	ENSMUSG00000079457
Gm16026	153.783535061282	0.204320765828093	0.213105982537242	0.958775363297863	0.337671923017336	0.999971315249418	ENSMUSG00000079455
Gm2619	42.9342826609745	0.153323336591143	0.348170566237222	0.440368461493317	0.659670263439471	0.999971315249418	ENSMUSG00000091199
ENSMUSG00000118591	49.774643422862	0.0788387038444146	0.298018705648166	0.264542803355068	0.791361686853406	0.999971315249418	ENSMUSG00000118591
Gm2427	253.162761880364	0.171997060995569	0.108283466452248	1.58839633261481	0.112196746252809	0.999971315249418	ENSMUSG00000101751
Gm16092	9.47690516401705	0.579197348200944	0.451359367603393	1.28322881892612	0.19941192219364	0.999971315249418	ENSMUSG00000089714
ENSMUSG00000118607	334.762590625084	0.151471072675809	0.233045535224896	0.649963418220541	0.515715851699928	0.999971315249418	ENSMUSG00000118607
Sp110	10971.1497367676	0.0667129535524442	0.120766717514847	0.552411748247133	0.580666283320055	0.999971315249418	ENSMUSG00000070034
Gm16094	410.648647794791	0.144376049349434	0.15885417160644	0.90885903649496	0.363424539000941	0.999971315249418	ENSMUSG00000090103
Sp140	8785.11232380855	0.0219261527077222	0.102805147622424	0.213278743475485	0.831109552379696	0.999971315249418	ENSMUSG00000070031
Gm10552	177.802132091665	0.129245866402654	0.155482951699939	0.831254262860156	0.405830006458871	0.999971315249418	ENSMUSG00000073628
Gm17017	40.0240855507807	-0.010298670892026	0.355297850412887	-0.0289860208274778	0.976875739674394	0.999971315249418	ENSMUSG00000090246
Sp100	7955.26607529118	0.0696740329893172	0.0742782711411729	0.938013660238471	0.348237390062263	0.999971315249418	ENSMUSG00000026222
A630001G21Rik	3078.73259683749	-0.0329136819964396	0.0796290749039621	-0.413337490560272	0.679359365713812	0.999971315249418	ENSMUSG00000052760
Cab39	7371.56076695883	-0.0734566256234334	0.188192257044529	-0.390327565953218	0.696294342001069	0.999971315249418	ENSMUSG00000036707
Itm2c	443.893886707256	0.217972984547077	0.111664071505334	1.95204224249217	0.0509331895691579	0.999971315249418	ENSMUSG00000026223
Gm18180	120.01046911529	-0.0110678609055345	0.249745314919742	-0.0443165907199953	0.964652047184453	0.999971315249418	ENSMUSG00000099342
Psmd1	15545.2506738456	0.263175707877737	0.351727395662583	0.748237729341404	0.454316777243556	0.999971315249418	ENSMUSG00000026229
Armc9	182.20329235928	0.213009248294072	0.124206120173546	1.71496580036835	0.0863514973301733	0.999971315249418	ENSMUSG00000062590
Gm16341	45.8317408214339	0.105489710660991	0.230432556918021	0.457789958467195	0.647103350723594	0.999971315249418	ENSMUSG00000087538
B3gnt7	542.866421870951	0.139281670516945	0.167285412332407	0.832599020888825	0.405070911388512	0.999971315249418	ENSMUSG00000079445
Ncl	322454.246518173	-0.0217190287241408	0.14871978884709	-0.146039937875865	0.883889860527005	0.999971315249418	ENSMUSG00000026234
C130036L24Rik	40.3144766254369	-0.236830611455618	0.288461189064938	-0.821013780825477	0.411638418630591	0.999971315249418	ENSMUSG00000073627
Ptma	209832.815293933	-0.0599559718914149	0.119324270630034	-0.502462504692854	0.615342221175729	0.999971315249418	ENSMUSG00000026238
Pde6d	253.597331808746	-0.0822887393822947	0.123573752843093	-0.665907909155924	0.505469964821858	0.999971315249418	ENSMUSG00000026239
Cops7b	522.548292464808	0.0171564501456405	0.0799109656742885	0.214694566645196	0.830005458996274	0.999971315249418	ENSMUSG00000026240
Dis3l2	571.607872357635	0.00681195524049174	0.131227893223539	0.0519093545827789	0.958600920447713	0.999971315249418	ENSMUSG00000053333
Gm37485	11.3149511005105	0.227981348553953	0.688304555697742	0.331221617911341	0.740477092234095	0.999971315249418	ENSMUSG00000104121
Gm6136	62834.5374739819	0.168071698924495	0.200058861833932	0.840111242180367	0.400846017321529	0.999971315249418	ENSMUSG00000084106
Gm37447	9.46063738688665	-0.168051707654896	0.5820966177913	-0.288700711391434	0.772810418259837	0.999971315249418	ENSMUSG00000103984
Eif4e2	4594.7511047129	0.13605894870413	0.16614718834761	0.818906116060597	0.412839980197119	0.999971315249418	ENSMUSG00000026254
Gigyf2	2606.90355786846	0.164579880345016	0.25415173458762	0.647565442006759	0.517266054875074	0.999971315249418	ENSMUSG00000048000
Gm6153	65.1436351114161	0.322400442955284	0.235354089083465	1.36985273640582	0.170732875995194	0.999971315249418	ENSMUSG00000090994
Inpp5d	2716.03711588311	-0.0582349182206079	0.202557591688246	-0.287498077634318	0.773730973665648	0.999971315249418	ENSMUSG00000026288
Atg16l1	611.076236043953	-0.0324634119020721	0.126346548396381	-0.256939444045802	0.797225520523158	0.999971315249418	ENSMUSG00000026289
Sag	8.000809175217	0.88977831301134	0.455742155210489	1.95237219738952	0.0508940314371196	0.999971315249418	ENSMUSG00000056055
Dgkd	2159.02448228182	0.0630391520283967	0.0963702428860947	0.654135033185567	0.513024812666562	0.999971315249418	ENSMUSG00000070738
Usp40	340.378702601031	0.105185759007151	0.134288721460095	0.783280664701298	0.433462314954374	0.999971315249418	ENSMUSG00000005501
Dnajb3	13.0669963416715	0.0402403384130245	0.363946724730032	0.110566562847554	0.911960063848352	0.999971315249418	ENSMUSG00000081984
Mroh2a	142.416669411367	0.0745953944403403	0.160885114996597	0.463656283192626	0.642894023009732	0.999971315249418	ENSMUSG00000079429
Hjurp	3957.73950747394	0.121377043849514	0.228271610061939	0.5317220298073	0.594918531757011	0.999971315249418	ENSMUSG00000044783
Glrp1	7.63122547993875	0.446522493904692	0.56362421412822	0.792234404966696	0.428224011043672	0.999971315249418	ENSMUSG00000062310
Sh3bp4	11.1862388527754	0.376217792758155	0.383338981193685	0.98142326039122	0.326384060275929	0.999971315249418	ENSMUSG00000036206
Ackr3	321.727369416481	0.0551467881905481	0.1728488757541	0.319046264836583	0.749691430263032	0.999971315249418	ENSMUSG00000044337
Cops8	1277.88085752515	-0.0942953965993078	0.117099752692294	-0.805257008928877	0.420671384789218	0.999971315249418	ENSMUSG00000034432
Lrrfip1	4401.85420898109	-0.0881879349660444	0.202867866703418	-0.434706276548815	0.663775641937974	0.999971315249418	ENSMUSG00000026305
Rbm44	36.487566450635	0.955476646463902	0.478239014607494	1.99790610401807	0.0457268407639071	0.999971315249418	ENSMUSG00000070732
Ube2f	964.412234914207	-0.0348422523861192	0.131245931823137	-0.265473008588727	0.790645100141193	0.999971315249418	ENSMUSG00000034343
Gm7785	12.0330923488906	-0.441841190002136	0.406465911179854	-1.08703135453499	0.277022953033616	0.999971315249418	ENSMUSG00000083064
Scly	402.56188830511	-0.0779248209687255	0.104058442334003	-0.748856308252288	0.453943816902906	0.999971315249418	ENSMUSG00000026307
Ilkap	4340.91600172539	-0.00300521513055485	0.146122963815231	-0.0205663439345158	0.983591588433929	0.999971315249418	ENSMUSG00000026309
Hes6	380.689343212984	0.0553560547530077	0.187355877893126	0.295459397247118	0.767642964840118	0.999971315249418	ENSMUSG00000067071
Per2	190.077809972244	-0.0811024311783196	0.273154960472928	-0.296909970215816	0.766535244104222	0.999971315249418	ENSMUSG00000055866
Traf3ip1	595.492053970287	-0.00780680447373201	0.132600305434182	-0.0588747095881088	0.953051901925515	0.999971315249418	ENSMUSG00000034292
Asb1	182.445795737181	-0.0255002602543794	0.107244976006281	-0.237775802690151	0.812054987143738	0.999971315249418	ENSMUSG00000026311
Hdac4	320.229079288887	0.0261589966277228	0.136833640857864	0.191173723535541	0.848389489509311	0.999971315249418	ENSMUSG00000026313
Ndufa10	3959.41491787531	0.0138599378492954	0.18307888972904	0.0757047296376355	0.939654013088078	0.999971315249418	ENSMUSG00000026260
Cops9	271.832576346879	-0.122716936480798	0.355594823604527	-0.345103270168175	0.730016735070051	0.999971315249418	ENSMUSG00000073616
Dusp28	57.1808449160369	-0.184715390775918	0.196345792839452	-0.940765717995065	0.346824932663754	0.999971315249418	ENSMUSG00000047067
Rnpepl1	521.605601788422	0.139170346628337	0.162007995004156	0.859033818823366	0.390321858077196	0.999971315249418	ENSMUSG00000026269
Capn10	215.053966428119	-0.19041842383749	0.158749466260158	-1.19949016726414	0.230337405832147	0.999971315249418	ENSMUSG00000026270
Sned1	9.71992459945942	0.348551990636906	0.440686809421411	0.790929029835336	0.428985407011814	0.999971315249418	ENSMUSG00000047793
Mterf4	535.471965485907	0.152373251847067	0.211552288156667	0.720262839862198	0.471363179706486	0.999971315249418	ENSMUSG00000026273
Gm7867	14.5907515424036	0.0767533270929799	0.642327103338886	0.119492586711673	0.904885112904615	0.999971315249418	ENSMUSG00000100351
Pask	418.196941070555	-0.0406453431600493	0.142881516228871	-0.284468867862115	0.776051088790431	0.999971315249418	ENSMUSG00000026274
Ppp1r7	2741.76316968481	-0.0410668494766234	0.0705483959559021	-0.582108904393704	0.560493327733997	0.999971315249418	ENSMUSG00000026275
Hdlbp	8929.11533053778	0.0802297731078152	0.286412660060033	0.280119506906569	0.779385819219991	0.999971315249418	ENSMUSG00000034088
Septin2	65.0182369557357	-0.0646283622813515	0.186227426430113	-0.347039979664892	0.728561283627496	0.999971315249418	ENSMUSG00000026276
Farp2	12.4892224897205	-0.206835254812489	0.538533861079979	-0.384071030181277	0.700925802465918	0.999971315249418	ENSMUSG00000034066
Stk25	571.421329809101	-0.0115950870034107	0.111221204552551	-0.104252485396633	0.916968983527972	0.999971315249418	ENSMUSG00000026277
Thap4	347.975216591246	-8.51257481348375e-05	0.138717402829955	-0.000613663076140402	0.999510367736744	0.999971315249418	ENSMUSG00000026279
Atg4b	527.822072942622	0.0107556660326511	0.093732986489316	0.114747928509427	0.908644923344028	0.999971315249418	ENSMUSG00000026280
Dtymk	1532.14396270356	-0.122988413067611	0.167377809780415	-0.734795211079421	0.462464224095519	0.999971315249418	ENSMUSG00000026281
Ing5	911.129739557897	-0.0130201976018721	0.0954828185290365	-0.136361680587724	0.891535365125378	0.999971315249418	ENSMUSG00000026283
D2hgdh	241.198360781638	-0.056272285607541	0.186595855340558	-0.301573073554275	0.762977537029567	0.999971315249418	ENSMUSG00000073609
Gm18666	47.4694446175511	0.233254454104472	0.4236259503616	0.550614177213104	0.581898188142612	0.999971315249418	ENSMUSG00000101660
Gm7889	9.47788233515299	0.519373465027531	0.781702871916525	0.664412890992926	0.506426084461634	0.999971315249418	ENSMUSG00000099624
Pdcd1	42.4434629942201	0.261502040462017	0.200543891462143	1.30396412753056	0.192245813623005	0.999971315249418	ENSMUSG00000026285
Gm7895	113.795478190616	0.0420235728485186	0.224879768232687	0.186871292063215	0.851761548286571	0.999971315249418	ENSMUSG00000100347
Fam174a	677.773659245756	-0.034232591374861	0.157101619879432	-0.217900944631462	0.827506291121532	0.999971315249418	ENSMUSG00000051185
BC055308	9.30633836993795	0.763941318055606	0.668040193314712	1.14355592028834	0.252807851108119	0.999971315249418	ENSMUSG00000103973
Gm15427	3446.39187633478	0.290615304939325	0.248680664126797	1.16862847362811	0.242553351110884	0.999971315249418	ENSMUSG00000081051
St8sia4	2488.50734742224	0.0923452705522563	0.139346616273472	0.662701922887213	0.507521478024616	0.999971315249418	ENSMUSG00000040710
Gm28901	12.7712660462504	-0.559993042655992	0.454544935377397	-1.23198610098041	0.217954276143956	0.999971315249418	ENSMUSG00000100454
Gm6430	6218.66593865333	-0.03739228102357	0.238375545800704	-0.15686290679679	0.875352893977794	0.999971315249418	ENSMUSG00000044757
D1Ertd622e	1533.65652144047	-0.113340846225573	0.135432922074034	-0.83687809795328	0.402661092651236	0.999971315249418	ENSMUSG00000044768
Ppip5k2	2536.86009725621	-0.167215856335034	0.123395571991188	-1.35512039562469	0.175379201535224	0.999971315249418	ENSMUSG00000040648
Gin1	374.39921291256	0.0269885211312019	0.106195160264727	0.254140782535891	0.799386797496286	0.999971315249418	ENSMUSG00000026333
Pam	26.9538732170201	-0.0868760944186261	0.300100537742732	-0.289489965836392	0.772206457441538	0.999971315249418	ENSMUSG00000026335
Gm3531	4691.4966548346	0.0437634043951183	0.221133241143333	0.197905137051521	0.843119284887132	0.999971315249418	ENSMUSG00000089782
Gm3555	9.40296767919155	0.272686556277311	0.807496894979591	0.337693628263677	0.735594076897977	0.999971315249418	ENSMUSG00000089791
Gm7967	36.9463628244549	-0.522388520083944	0.268253679990184	-1.94736758169752	0.0514906817387742	0.999971315249418	ENSMUSG00000100009
Prdx2-ps1	17.2090608385158	0.232320432194258	0.421576732919684	0.551075080888104	0.581582206913039	0.999971315249418	ENSMUSG00000082431
Gm29667	13.9356932456045	0.679064378153196	0.497598294239546	1.36468389464834	0.172352423713222	0.999971315249418	ENSMUSG00000100794
Gm28187	21.76611335388	0.52009970902203	0.296050545707342	1.7567936170473	0.0789529934632483	0.999971315249418	ENSMUSG00000099375
Capza1-ps1	1691.38550522589	-0.104424695138925	0.169356819920899	-0.616595748477674	0.537501399497656	0.999971315249418	ENSMUSG00000067017
Pign	515.494143192329	0.112151909689249	0.195930063009771	0.572407868228244	0.567045686563601	0.999971315249418	ENSMUSG00000056536
Relch	685.616060175871	-0.169727209484962	0.116456674327883	-1.45742792729162	0.144998292741019	0.999971315249418	ENSMUSG00000026319
Gm10193	9.72321342242925	-0.313320673490877	0.395349137348942	-0.792516395993385	0.428059635368792	0.999971315249418	ENSMUSG00000101330
Gm7160	57.4822407131014	0.0194781889364915	0.182527846714511	0.106713519537416	0.915016256815492	0.999971315249418	ENSMUSG00000099843
Zcchc2	2044.19501599251	0.00389186542542046	0.0681519796168282	0.0571056841973153	0.954461008479928	0.999971315249418	ENSMUSG00000038866
Phlpp1	1076.86377769182	0.0555319142815645	0.200946033949921	0.276352377750356	0.782277429960081	0.999971315249418	ENSMUSG00000044340
Bcl2	1591.12856332914	0.166983089924608	0.103238550528804	1.61744899622569	0.105781396791608	0.999971315249418	ENSMUSG00000057329
Kdsr	315.431955049341	-0.0707953137849138	0.117060111027146	-0.604777435829498	0.545326888204003	0.999971315249418	ENSMUSG00000009905
Vps4b	2247.43810727677	-0.16818937984669	0.167464218427569	-1.0043302469383	0.315219459073113	0.999971315249418	ENSMUSG00000009907
Gm8173	6.90102319257084	0.529898758306932	0.597702580903004	0.886559260805542	0.375316235542231	0.999971315249418	ENSMUSG00000100555
Dsel	53.0204752871639	0.0496306741459995	0.208223071561935	0.238353385980271	0.811607018196408	0.999971315249418	ENSMUSG00000038702
Gm29106	6.23459499851866	-0.700785599579801	0.477295690944087	-1.46824204130914	0.142038488177239	0.999971315249418	ENSMUSG00000102030
Tsn	3841.38666442479	-0.0676860244660193	0.158939740784184	-0.42585966311551	0.670210108852028	0.999971315249418	ENSMUSG00000026374
Nifk	5673.66870158685	-0.135451141585601	0.0921630287819327	-1.46969064901385	0.141645556456789	0.999971315249418	ENSMUSG00000026377
Clasp1	1966.97124269471	0.0604069422559946	0.196212806829186	0.307864421452277	0.758185499302518	0.999971315249418	ENSMUSG00000064302
Ralb	742.832714301029	-0.0351824355950286	0.27334527355253	-0.128710605227522	0.897586643458244	0.999971315249418	ENSMUSG00000004451
Tmem185b	191.082411458291	-0.206309375262581	0.152303081520105	-1.35459751177357	0.175545826675786	0.999971315249418	ENSMUSG00000098923
Epb41l5	78.859274526271	0.100258896171871	0.254720734403037	0.393603200017611	0.693874018290224	0.999971315249418	ENSMUSG00000026383
Ptpn4	640.490342486936	-0.140927574169758	0.184203996616961	-0.765062521758455	0.444234315667975	0.999971315249418	ENSMUSG00000026384
Gm3851	47.5711545971931	-0.0561862420374126	0.172225733159013	-0.326236045025495	0.744245771904378	0.999971315249418	ENSMUSG00000091876
Tmem177	175.1119684569	-0.0269071314230855	0.202038752035306	-0.133178071790819	0.89405255252789	0.999971315249418	ENSMUSG00000036975
Dbi	4564.63215058058	0.0968682080677196	0.335126552233252	0.28904963639019	0.77254339354862	0.999971315249418	ENSMUSG00000026385
3110009E18Rik	58.5051970226537	0.0451689045663595	0.27906079927945	0.161860442896272	0.871415753974201	0.999971315249418	ENSMUSG00000026388
Steap3	35.4581093813004	-0.404472106591236	0.246871819579224	-1.63838913360233	0.10134054448215	0.999971315249418	ENSMUSG00000026389
Insig2	334.177537939896	0.0277412039421768	0.149752886362147	0.185246539255947	0.853035667678168	0.999971315249418	ENSMUSG00000003721
Gm37174	16.344647095037	0.145617282728806	0.332592462576413	0.437824963322343	0.661513173421884	0.999971315249418	ENSMUSG00000104253
Ccdc93	608.937271046031	-0.0336122976820252	0.140661462091018	-0.238958824843408	0.811137510893441	0.999971315249418	ENSMUSG00000026339
Ddx18	5650.54284313968	-0.100971855249119	0.183617527007549	-0.549903143205759	0.582385808230905	0.999971315249418	ENSMUSG00000001674
Gm28911	187.900929333562	0.735466509392866	0.444773303183694	1.65357611198421	0.0982136696444469	0.999971315249418	ENSMUSG00000100405
Actr3	36615.9051838703	-0.18972647538086	0.144871260474407	-1.30962120961443	0.190324009719331	0.999971315249418	ENSMUSG00000026341
Slc35f5	120.065768180122	0.140898664276604	0.192839698941959	0.730651754019858	0.464991891601386	0.999971315249418	ENSMUSG00000026342
Mgat5	409.32292687114	0.129135078344732	0.203937704114727	0.633208454048721	0.526597525715441	0.999971315249418	ENSMUSG00000036155
Gm8451	812.372342406385	0.639434292838413	0.334182437960576	1.9134287748354	0.0556931835935438	0.999971315249418	ENSMUSG00000099471
Tmem163	25.2507511454147	-0.0352405154138496	0.246131723956085	-0.143177461431738	0.886150029584754	0.999971315249418	ENSMUSG00000026347
Ccnt2	1249.36631655577	0.0734400652607168	0.10036057760689	0.731762082402311	0.464313796235679	0.999971315249418	ENSMUSG00000026349
Map3k19	14.9720368962876	0.365476626121765	0.341877497019828	1.06902802702036	0.285057040578309	0.999971315249418	ENSMUSG00000051590
Rab3gap1	1880.21793679545	0.00599575242037852	0.242534256212485	0.0247212600562521	0.980277297189045	0.999971315249418	ENSMUSG00000036104
Zranb3	189.521835350865	-0.00927121753143479	0.178557612067615	-0.0519228355715467	0.958590178660736	0.999971315249418	ENSMUSG00000036086
Rpl28-ps1	2406.3222640528	0.120367645047264	0.267004221847082	0.450808021740575	0.652127919303404	0.999971315249418	ENSMUSG00000058603
R3hdm1	1524.88901252581	0.0321656104731514	0.255270511800109	0.126005977918589	0.899727192600216	0.999971315249418	ENSMUSG00000056211
Ubxn4	5985.40557614797	0.148642984541236	0.128790953685449	1.15414150053017	0.24844216141784	0.999971315249418	ENSMUSG00000026353
Mcm6	10911.5939444582	-0.0876265789284998	0.0726831855792578	-1.20559629067093	0.227973190138189	0.999971315249418	ENSMUSG00000026355
Dars	7496.78501887865	-0.177900741408347	0.149387568463176	-1.19086710653705	0.233705759442714	0.999971315249418	ENSMUSG00000026356
Gm6170	1259.14246788178	0.464605339868128	0.228402713563093	2.03414982519368	0.0419364916350553	0.999971315249418	ENSMUSG00000100078
Cxcr4	564.417861052191	0.0964481669014287	0.375854671376689	0.256610265207443	0.797479649816107	0.999971315249418	ENSMUSG00000045382
Gm15790	29.583135177134	-0.318362822353491	0.246549093958813	-1.29127557210441	0.196608138033018	0.999971315249418	ENSMUSG00000089648
Cd55b	16.838924154635	-0.278598612290327	0.367272862113669	-0.758560299519494	0.448115629049704	0.999971315249418	ENSMUSG00000026401
Cd55os	7.72531547588279	0.45178276034413	0.489850269998111	0.922287458055034	0.356378654276313	0.999971315249418	ENSMUSG00000087691
Gm15675	33.7997021205662	0.0949448433588039	0.24728448957938	0.383949852739655	0.70101561572075	0.999971315249418	ENSMUSG00000086825
Cd55	470.302799257011	0.0199516642965935	0.13889713491947	0.143643454619573	0.885782024640189	0.999971315249418	ENSMUSG00000026399
ENSMUSG00000026405	7.18168594649736	0.98562422729679	0.560446978338893	1.75863955983504	0.0786387492089604	0.999971315249418	ENSMUSG00000026405
Pfkfb2	37.3001961841939	0.305749653742168	0.229089539784873	1.33462948168337	0.181997643966406	0.999971315249418	ENSMUSG00000026409
Yod1	454.270467058026	-0.0157963082075923	0.17993874182406	-0.0877871438216323	0.930045856056871	0.999971315249418	ENSMUSG00000046404
AA986860	15.9546240394495	0.0632453031961515	0.344556770443454	0.183555537494599	0.854362146292117	0.999971315249418	ENSMUSG00000042510
Gm15848	18.4298722001778	-0.415644672286989	0.364875111959494	-1.13914229461924	0.254643809260938	0.999971315249418	ENSMUSG00000086706
Pigr	38.967118851588	0.453183380561055	0.551318777981644	0.821998812048704	0.411077573013081	0.999971315249418	ENSMUSG00000026417
Fcmr	497.789079450779	-0.120892383329826	0.124591563789953	-0.970309543057318	0.331892221911984	0.999971315249418	ENSMUSG00000042474
Mapkapk2	3089.85699018818	-0.113750431735762	0.136449275645557	-0.833646285021266	0.404480335342066	0.999971315249418	ENSMUSG00000016528
Dyrk3	103.42716952777	0.00514747091811459	0.117534973972565	0.0437952274470756	0.965067631381533	0.999971315249418	ENSMUSG00000016526
Eif2d	902.345220256985	-0.0734798783819045	0.0936520482146919	-0.784605139798503	0.432685115598234	0.999971315249418	ENSMUSG00000026427
Rassf5	1428.33004014294	-0.151787382729359	0.155376649346105	-0.976899575117298	0.328618872165795	0.999971315249418	ENSMUSG00000026430
Ikbke	390.589720374729	0.151650163750016	0.191092092587069	0.793597273947472	0.42742991997094	0.999971315249418	ENSMUSG00000042349
Srgap2	648.30348698203	0.243697413227751	0.208304540852868	1.16990926952419	0.242037483180978	0.999971315249418	ENSMUSG00000026425
Fam72a	435.600800170563	-0.156444603208449	0.158256177489759	-0.988552900050759	0.322881940204991	0.999971315249418	ENSMUSG00000055184
Ctse	33.9096782130922	-0.0267222701862946	0.295013888450106	-0.0905797022868434	0.927826560848464	0.999971315249418	ENSMUSG00000004552
Slc41a1	204.785506251648	0.105430258373195	0.288623090777269	0.365286984105354	0.714897193300778	0.999971315249418	ENSMUSG00000013275
Rab29	329.557612842489	0.0454314071844776	0.139573968761683	0.325500575698682	0.744802246981505	0.999971315249418	ENSMUSG00000026433
Nucks1	12644.9601160124	0.128002880218962	0.244074688290748	0.52444143682151	0.599971542281378	0.999971315249418	ENSMUSG00000026434
Gm38067	13.6086322441092	0.136486852887395	0.364473143795574	0.374477119126088	0.708049376597283	0.999971315249418	ENSMUSG00000103569
Elk4	1373.99499396641	0.106420305990747	0.241097784573291	0.441398937692836	0.6589242111451	0.999971315249418	ENSMUSG00000026436
Mfsd4a	137.362702667484	0.245107320525129	0.367188507310631	0.667524488498696	0.504437172896803	0.999971315249418	ENSMUSG00000059149
Gm37120	24.7517482986292	0.64317180072545	0.423147557613729	1.5199704905601	0.128518392390299	0.999971315249418	ENSMUSG00000103966
Nuak2	270.756493941785	-0.0973448708222017	0.104346546620374	-0.932899784181214	0.35087171382435	0.999971315249418	ENSMUSG00000009772
F730311O21Rik	21.4127570661601	0.0685194473767403	0.410914374452871	0.166748723424371	0.867567766444877	0.999971315249418	ENSMUSG00000100658
6030442K20Rik	12.5608962516734	0.0852633028280131	0.343694514135905	0.248078742374974	0.804073482732746	0.999971315249418	ENSMUSG00000097760
Rbbp5	1409.28427196042	0.0972019618981344	0.247978854337339	0.391976816563179	0.695075343596177	0.999971315249418	ENSMUSG00000026439
Tmem81	149.149730717774	-0.0573490004376802	0.164538080239107	-0.348545457406215	0.727430581308684	0.999971315249418	ENSMUSG00000048174
Mdm4	2710.54082806118	0.212542913918068	0.141186717437985	1.50540304197826	0.132220487486857	0.999971315249418	ENSMUSG00000054387
Gm29257	86.436339771939	0.409840784651431	0.443497815090729	0.924110042272896	0.355429025322231	0.999971315249418	ENSMUSG00000100228
Pik3c2b	680.966704687847	-0.0831668465642944	0.280341833574211	-0.296662276564153	0.766724360060183	0.999971315249418	ENSMUSG00000026447
Gm26616	10.441559313757	0.358439373136459	0.473436811751243	0.757100766648439	0.448989494802825	0.999971315249418	ENSMUSG00000102425
Ppp1r15b	5971.66161879988	0.0252739899680212	0.0724986319144913	0.348613336563795	0.727379614027622	0.999971315249418	ENSMUSG00000046062
Plekha6	47.3487639360599	0.12650712471623	0.264568540157095	0.478163899007467	0.632533555049984	0.999971315249418	ENSMUSG00000041757
Snrpe	4946.4916142954	-0.0226224857397805	0.302793975136424	-0.074712469855412	0.940443485895302	0.999971315249418	ENSMUSG00000090553
Zc3h11a	207.829559110562	0.333212571384835	0.473968838247196	0.703026326830056	0.482039342878978	0.999971315249418	ENSMUSG00000102976
Gm38394	226.92175255634	0.226496286712778	0.554124066134158	0.408746525472044	0.682725686564191	0.999971315249418	ENSMUSG00000094410
Lax1	708.540932300919	0.120695164131624	0.090604954410976	1.33210335920662	0.182826226654754	0.999971315249418	ENSMUSG00000051998
Tmem183a	2556.72668413742	-0.137954426280807	0.0762806126440861	-1.80851230081857	0.0705268040939574	0.999971315249418	ENSMUSG00000042305
Cyb5r1	255.047629589274	-0.168342071549584	0.324042039219754	-0.519506888534979	0.603407310455111	0.999971315249418	ENSMUSG00000026456
Adipor1	3344.28603156374	-0.183150343793556	0.267432419476645	-0.684847200470212	0.493440346915059	0.999971315249418	ENSMUSG00000026457
Klhl12	736.540354069075	-0.0587294392914973	0.154441117844797	-0.380270747266389	0.703744447695978	0.999971315249418	ENSMUSG00000026455
Rabif	313.745887453535	-0.0865227463644999	0.12965014863045	-0.667355550907396	0.504545050784851	0.999971315249418	ENSMUSG00000042229
Gm15454	101.932147027987	-0.0939378305525733	0.205173366181095	-0.457846124480211	0.647062995461758	0.999971315249418	ENSMUSG00000096712
Kdm5b	420.512002352251	0.511341512682001	0.259840669310811	1.9679040776729	0.0490790755551608	0.999971315249418	ENSMUSG00000042207
Ppp1r12b	128.847581005101	0.255926372847878	0.309674495376829	0.826436715546922	0.408556403205994	0.999971315249418	ENSMUSG00000073557
Ube2t	175.938251433085	-0.00592163096374483	0.149349830104656	-0.039649398727774	0.968372643888718	0.999971315249418	ENSMUSG00000026429
Ptprv	26.5707965806687	0.0846973200784614	0.235132485744674	0.360211052123323	0.71868931030648	0.999971315249418	ENSMUSG00000097993
Arl8a	561.888137598339	0.0803288799619836	0.114320339615177	0.702664812161904	0.482264661459436	0.999971315249418	ENSMUSG00000026426
Gm4204	7779.75626009234	-0.126713977219188	0.236878213247686	-0.534933016767957	0.59269617647648	0.999971315249418	ENSMUSG00000079139
Gm26642	19.113974513071	0.206300945328368	0.422721857064468	0.488029993908986	0.625528596027175	0.999971315249418	ENSMUSG00000097680
Rnpep	776.973495253332	0.0575240371738952	0.125176962095591	0.459541725656892	0.645845195587699	0.999971315249418	ENSMUSG00000041926
Timm17a	1607.79397427392	-0.152892671200334	0.234954591248257	-0.650732851773836	0.515218952651381	0.999971315249418	ENSMUSG00000062580
Ipo9	2784.8080332167	-0.0286198660783565	0.106630660627803	-0.268401845302777	0.788390019262435	0.999971315249418	ENSMUSG00000041879
Csrp1	2060.18092231406	0.14754628512846	0.133363742999718	1.10634481163874	0.26857730287821	0.999971315249418	ENSMUSG00000026421
Lad1	1835.02337214233	0.0833667276147999	0.238837885967876	0.349051522027007	0.727050630111893	0.999971315249418	ENSMUSG00000041782
ENSMUSG00000026414	39.457862911898	-0.0114374374014131	0.279151029976868	-0.0409722199569204	0.967318042521518	0.999971315249418	ENSMUSG00000026414
Tmem9	201.238105122507	0.206074975888694	0.12972542579812	1.58854730767575	0.112162632454293	0.999971315249418	ENSMUSG00000026411
Gm37759	9.00893533235845	0.43838161832131	0.425126086755956	1.03118023564845	0.302456307220482	0.999971315249418	ENSMUSG00000102717
Kif21b	912.315002705951	0.375879504191673	0.341044557002994	1.10214192390226	0.270399975589415	0.999971315249418	ENSMUSG00000041642
Camsap2	547.497387985654	-0.0275268877850017	0.211799116886622	-0.129966962042326	0.896592565415785	0.999971315249418	ENSMUSG00000041570
9230116N13Rik	29.5549009495116	-0.30407862007463	0.241017038298522	-1.26164781635895	0.207075542077046	0.999971315249418	ENSMUSG00000097403
Ddx59	218.589531841717	0.0778452291581377	0.126591937196535	0.614930388791528	0.538600692914494	0.999971315249418	ENSMUSG00000026404
Kif14	787.165182973687	0.0987868156385578	0.29501560853431	0.334852844326944	0.73773609527753	0.999971315249418	ENSMUSG00000041498
Zfp281	1114.89017956307	0.24004297813328	0.155814572066701	1.54056822124777	0.123421907202	0.999971315249418	ENSMUSG00000041483
Gm8762	12.4500647505479	0.746412293066848	0.432552480270648	1.72559938299237	0.0844195104477918	0.999971315249418	ENSMUSG00000104360
ENSMUSG00000098206	9.63529360000355	0.590702714426883	0.707866797191604	0.834482867073921	0.404008937984006	0.999971315249418	ENSMUSG00000098206
Ptprc	10167.3943083631	-0.0668873637582015	0.226940556178643	-0.29473517155545	0.768196192996842	0.999971315249418	ENSMUSG00000026395
Nek7	1994.20493594056	-0.0980356176619301	0.14926635998453	-0.656783066674171	0.511320413791897	0.999971315249418	ENSMUSG00000026393
Gm37101	8.18693826205688	0.959737198359413	1.15789383359227	0.828864590617872	0.407181034030142	0.999971315249418	ENSMUSG00000102448
2310009B15Rik	423.291864787967	0.0782562139343001	0.246322733539499	0.317697894992512	0.750714108111296	0.999971315249418	ENSMUSG00000079283
Dennd1b	930.690154655736	-0.00471737668989431	0.0950743621963388	-0.0496177579414356	0.96042699527056	0.999971315249418	ENSMUSG00000056268
Gm37423	12.6023266885159	0.623259176153943	0.976242009846183	0.638426916551301	0.523195814084925	0.999971315249418	ENSMUSG00000104436
4930596I21Rik	10.9158843558421	0.174449765796843	0.509320686154118	0.342514589607804	0.731963666331203	0.999971315249418	ENSMUSG00000104900
Zbtb41	382.958596945256	-0.136172202299072	0.234818573493069	-0.579903881849835	0.561979437828769	0.999971315249418	ENSMUSG00000033964
Aspm	1545.33750580956	0.0587977744026832	0.221669293917337	0.26524997379479	0.790816899636323	0.999971315249418	ENSMUSG00000033952
Gm5837	551.989613662961	0.0686024610825657	0.128548728210567	0.533668921019528	0.593570615145415	0.999971315249418	ENSMUSG00000104496
Cdc73	1675.45699901507	-0.0706809473416372	0.187811493277773	-0.376339840060267	0.706664264536751	0.999971315249418	ENSMUSG00000026361
Gm6397	4362.75265477135	-0.037792108543991	0.109904446018716	-0.343863327763422	0.730949072155539	0.999971315249418	ENSMUSG00000089640
Glrx2	498.135712832059	0.123620845127764	0.227713764576625	0.542878228541014	0.587213646875759	0.999971315249418	ENSMUSG00000018196
Ro60	63.708010653347	-0.155334294289531	0.190809467822129	-0.814080643180304	0.415598754093903	0.999971315249418	ENSMUSG00000018199
Uchl5	6118.26077106568	-0.152143677109937	0.17734739948217	-0.857885018636727	0.390955957466012	0.999971315249418	ENSMUSG00000018189
Gm29170	64.2691451914232	-0.223398989759752	0.151493696477282	-1.4746421465348	0.140308777510642	0.999971315249418	ENSMUSG00000100455
Rgs1	64.6076984953982	0.193663392547918	0.349006526198734	0.554899057783352	0.578963706406733	0.999971315249418	ENSMUSG00000026358
Rgs18	42.4448576191846	-0.155469876594959	0.198294332123528	-0.784035907280034	0.433019041225408	0.999971315249418	ENSMUSG00000026357
Gm5263	43.2563354933317	0.496630829228723	0.325042674576063	1.52789423689198	0.126538799331277	0.999971315249418	ENSMUSG00000090323
Gm15583	720.666740503453	-0.0171576347417747	0.396133363846451	-0.0433127736961467	0.965452208841643	0.999971315249418	ENSMUSG00000080078
Pla2g4a	46.2570670743728	-0.0799408552365559	0.256006358270816	-0.312261210137565	0.754842016982468	0.999971315249418	ENSMUSG00000056220
Ptgs2	16.2779910902675	0.850055596829388	0.459465170994631	1.85009800631726	0.0642994252458676	0.999971315249418	ENSMUSG00000032487
Rbm3-ps	812.586895222093	0.0672631531660914	0.17857802822916	0.376659737108174	0.706426487879771	0.999971315249418	ENSMUSG00000099875
Odr4	1320.31985634901	0.144334273683532	0.0992566034239572	1.45415285940254	0.145903931214275	0.999971315249418	ENSMUSG00000006010
Tpr	12600.935269786	0.069860948785654	0.188878119748897	0.369873169420208	0.711476993654715	0.999971315249418	ENSMUSG00000006005
Prg4	14.5525219860531	0.165230925903681	0.407600150797246	0.405375036246913	0.685201857936685	0.999971315249418	ENSMUSG00000006014
Gm10138	32.7146956896719	0.700915237765146	0.426685664845354	1.64269694417595	0.100445651363712	0.999971315249418	ENSMUSG00000100954
Ivns1abp	7421.35412871293	-0.187872408309084	0.134122502834587	-1.40075232968764	0.161288148256265	0.999971315249418	ENSMUSG00000023150
Swt1	568.598755232551	0.0883900094077123	0.111776112492924	0.790777272857003	0.429073974488338	0.999971315249418	ENSMUSG00000052748
Trmt1l	1020.34202806361	0.0384565245560034	0.0927119083707706	0.414795954821782	0.678291281109486	0.999971315249418	ENSMUSG00000053286
Gm37893	30.2838229940661	0.655324963820564	0.546675783541436	1.19874518599541	0.230627042170883	0.999971315249418	ENSMUSG00000103928
Rnf2	1536.57540053079	-0.148665232943434	0.141310692784717	-1.05204517799599	0.292778822509573	0.999971315249418	ENSMUSG00000026484
Gm19503	52.7767513360618	0.578515094885483	0.40963792460641	1.41225960814379	0.157873534894975	0.999971315249418	ENSMUSG00000100551
Fam129a	1095.91239058278	0.269935771057405	0.227281192704046	1.1876731543243	0.234962204298682	0.999971315249418	ENSMUSG00000026483
2810414N06Rik	10.761879443667	0.44010311633671	0.391626139300626	1.12378381362045	0.261104749851074	0.999971315249418	ENSMUSG00000100594
Edem3	1088.60572861006	0.0905358099345616	0.254268176741006	0.356064258984246	0.721792442637001	0.999971315249418	ENSMUSG00000043019
1700025G04Rik	89.0756066729586	0.165004690814459	0.172537225190869	0.95634255524814	0.338899196726655	0.999971315249418	ENSMUSG00000032666
Tsen15	415.635073842271	-0.180661548795933	0.209069932761754	-0.864120184138609	0.387521872134022	0.999971315249418	ENSMUSG00000014980
Rgl1	118.178041299176	0.101024590416124	0.153976762872793	0.65610283351381	0.511757961429273	0.999971315249418	ENSMUSG00000026482
Arpc5	4309.32517964272	-0.0887325506549165	0.0675625564876477	-1.31333915215507	0.18906869117016	0.999971315249418	ENSMUSG00000008475
Ncf2	2145.36978899575	0.0912632243016773	0.111429027434458	0.81902558429273	0.412771816875676	0.999971315249418	ENSMUSG00000026480
Smg7	2810.14474517633	0.0317290164094783	0.0939518560873784	0.337715695366031	0.735577445799478	0.999971315249418	ENSMUSG00000042772
Lamc1	1273.53436616134	0.194502805466427	0.289772394464732	0.671226138796667	0.502076479416005	0.999971315249418	ENSMUSG00000026478
Gm8818	12.6904368340956	0.447677689540992	0.451962558077923	0.9905194170173	0.321920303283345	0.999971315249418	ENSMUSG00000079138
E330020D12Rik	198.512736192617	-0.00921614367253938	0.14318989077264	-0.0643630889220591	0.948681119834435	0.999971315249418	ENSMUSG00000073538
Shcbp1l	66.5716335013892	-0.0684859550077336	0.227653535991866	-0.300834136879739	0.763540976013606	0.999971315249418	ENSMUSG00000042708
ENSMUSG00000103543	8.30719827479188	-0.199552106054645	0.490102598954601	-0.407163941754836	0.683887583082388	0.999971315249418	ENSMUSG00000103543
Dhx9	11592.8023708053	0.0694762927583268	0.247481262039154	0.280733548010334	0.778914775466598	0.999971315249418	ENSMUSG00000042699
Gm6652	21.0226265695683	-0.0583900553119179	0.281208004082999	-0.207640090125899	0.835509999118882	0.999971315249418	ENSMUSG00000099858
Rgs16	28.790294334876	0.371818502901172	0.29139312465264	1.27600300571403	0.201954456585148	0.999971315249418	ENSMUSG00000026475
Rnasel	167.12312634646	0.204382291091762	0.187370740899608	1.09079085726233	0.275364920375613	0.999971315249418	ENSMUSG00000066800
Glul	1094.8643077642	-0.137979413814047	0.113649971782484	-1.21407345422071	0.224719675844439	0.999971315249418	ENSMUSG00000026473
Cacna1e	165.276560324125	0.204859553270772	0.167261482508127	1.22478618626867	0.220655790985366	0.999971315249418	ENSMUSG00000004110
Ier5	4140.83282534397	-0.0676058359708101	0.125730789029061	-0.537703107511587	0.590782033545544	0.999971315249418	ENSMUSG00000056708
Mr1	55.3242613825892	0.0528373094823991	0.209285187296806	0.252465595701553	0.800681203605538	0.999971315249418	ENSMUSG00000026471
Stx6	1069.27577369589	-0.0329734768142078	0.0840238832035115	-0.392429813489384	0.694740661116666	0.999971315249418	ENSMUSG00000026470
Xpr1	412.18745635318	0.0758831219561922	0.222556367774166	0.340961360553803	0.733132670398015	0.999971315249418	ENSMUSG00000026469
Acbd6	1749.82652125051	0.0215600133266354	0.181657085765349	0.118685231769517	0.905524737181883	0.999971315249418	ENSMUSG00000033701
Cep350	1189.50128376618	0.14402436732208	0.265931079826283	0.541585313819515	0.588104211235612	0.999971315249418	ENSMUSG00000033671
Tor1aip1	2158.70958226378	0.0632881134347089	0.138059500688711	0.458411866760315	0.64665656770725	0.999971315249418	ENSMUSG00000026466
9430034N14Rik	13.1018514122747	0.264293361970224	0.377419527253218	0.700264143441907	0.483762360040261	0.999971315249418	ENSMUSG00000102964
Tor1aip2	1918.96235971818	-0.0593686284140372	0.123008068778132	-0.482640114618168	0.629351290962075	0.999971315249418	ENSMUSG00000050565
Gm2000	5737.59714780834	0.175819419961412	0.346878316606778	0.506861949980924	0.612251685213222	0.999971315249418	ENSMUSG00000078193
Soat1	912.981397149874	-0.141783751490317	0.178143813288683	-0.795894894539816	0.426093128979346	0.999971315249418	ENSMUSG00000026600
Csnk2a3	786.636040079905	-0.0437218370412091	0.170281628098451	-0.256761915712543	0.797362571469858	0.999971315249418	ENSMUSG00000101523
Abl2	453.106569792115	0.061386550505626	0.249322792130772	0.246213151958559	0.8055172350954	0.999971315249418	ENSMUSG00000026596
Tor3a	3115.75827380529	0.262956255170455	0.130736852617997	2.01133995430343	0.044289561016764	0.999971315249418	ENSMUSG00000060519
Fam20b	811.872645215209	-0.0892588677787445	0.256722756917701	-0.347685841529657	0.728076130879572	0.999971315249418	ENSMUSG00000033557
Gm15428	72.2786349175376	0.0764697975722842	0.498027970224147	0.153545186504018	0.877968359077205	0.999971315249418	ENSMUSG00000046057
Ralgps2	2894.36792132245	-0.00156189939710049	0.0994018223363127	-0.0157129855408084	0.987463367313071	0.999971315249418	ENSMUSG00000026594
Gm37802	7.04210535077131	0.276181562952665	0.657770501088218	0.419875264238438	0.674576578718497	0.999971315249418	ENSMUSG00000103303
Rasal2	49.8342319997828	0.276703838636522	0.222309146477461	1.24468040573659	0.213249251294518	0.999971315249418	ENSMUSG00000070565
2810025M15Rik	154.214728743567	0.220980115382836	0.227124878338513	0.972945443050415	0.330580417877289	0.999971315249418	ENSMUSG00000049881
Cryzl2	108.804524706791	-0.0117479957173746	0.1404118523647	-0.0836681200306425	0.933320304771584	0.999971315249418	ENSMUSG00000033488
Cop1	2410.8936310423	-0.0980673489593019	0.0731254817498424	-1.34108311648167	0.17989346829318	0.999971315249418	ENSMUSG00000040782
4930523C07Rik	697.918954656844	0.0438807999166772	0.103868242049988	0.422465992016684	0.672684918435617	0.999971315249418	ENSMUSG00000090394
Mrps14	1543.32999819906	-0.0398121544671511	0.252683097473802	-0.157557647761853	0.874805378814923	0.999971315249418	ENSMUSG00000058267
Cacybp	16243.3212750983	-0.276667191448839	0.144015622365524	-1.92109152399199	0.0547201700028827	0.999971315249418	ENSMUSG00000014226
4933417C20Rik	7.94569502462081	0.16410079592095	0.513724036471465	0.319433750945514	0.749397620776985	0.999971315249418	ENSMUSG00000103006
Rabgap1l	2094.9459703373	-0.0340755204888692	0.138153819056846	-0.246649138775151	0.805179771887436	0.999971315249418	ENSMUSG00000026721
Gm37529	11.9880392096761	1.1338635333432	0.923650547553146	1.22758930457729	0.219601178804951	0.999971315249418	ENSMUSG00000103693
Gm38329	24.2955690408809	-0.199479744927091	0.399378240922849	-0.499475746265372	0.617444268945233	0.999971315249418	ENSMUSG00000103632
Rc3h1	743.007057790485	0.0182994151329756	0.111291831645352	0.164427297695031	0.869394775565994	0.999971315249418	ENSMUSG00000040423
Serpinc1	13.7328146748483	-0.413707107596704	0.357016296459998	-1.15879054177309	0.246541573751922	0.999971315249418	ENSMUSG00000026715
Zbtb37	171.147399323612	0.0233721799615841	0.209417296095398	0.111605776587513	0.911135991587478	0.999971315249418	ENSMUSG00000043467
Gas5	11591.396466591	0.0197530677608502	0.213458915800287	0.0925380309685978	0.926270576492097	0.999971315249418	ENSMUSG00000053332
Dars2	611.450030636911	-0.148547366801032	0.137590758154557	-1.07963186476643	0.280306145962464	0.999971315249418	ENSMUSG00000026709
Cenpl	379.514207853154	-0.155181595230265	0.110998808827859	-1.39804739230064	0.1620988360358	0.999971315249418	ENSMUSG00000026708
Klhl20	621.431707638876	0.0239170797664576	0.292893790983564	0.0816578585914772	0.934918790366854	0.999971315249418	ENSMUSG00000026705
Prdx6	2053.54198757854	-0.158919129060232	0.180698555836098	-0.8794709416736	0.379145981947301	0.999971315249418	ENSMUSG00000026701
Gm15429	296.599216616117	-0.12913953985996	0.112534578990905	-1.1475542985805	0.251152605414846	0.999971315249418	ENSMUSG00000040323
Suco	1503.42186866109	-0.0416830459488789	0.193958513032387	-0.214907019533186	0.829839811963591	0.999971315249418	ENSMUSG00000040297
Pigc	273.00056299961	0.0729424689613834	0.0814442716055068	0.895612024313953	0.370460011431499	0.999971315249418	ENSMUSG00000026698
Dnm3	9.93909594963579	0.0367692200790599	0.44304644557168	0.0829917956606448	0.933858063223777	0.999971315249418	ENSMUSG00000040265
Eef1aknmt	726.407742374187	-0.0794350013396076	0.122424748098108	-0.648847578399349	0.516436900969485	0.999971315249418	ENSMUSG00000026694
Vamp4	793.628584440926	-0.0873409335883616	0.154036878953229	-0.567013134659014	0.5707052578779	0.999971315249418	ENSMUSG00000026696
Prrc2c	7557.6099178332	0.0938225902889274	0.258690081210013	0.362683369420567	0.716841424329203	0.999971315249418	ENSMUSG00000040225
ENSMUSG00000098259	8.32051667338513	0.228978397822073	0.476318552842859	0.480725339072851	0.63071171958283	0.999971315249418	ENSMUSG00000098259
Gorab	195.318441969833	-0.159211321982583	0.162112527535759	-0.982103754735821	0.326048735894643	0.999971315249418	ENSMUSG00000040124
Rpsa-ps1	34.3174617988619	0.312508389737127	0.579209421337937	0.539543001588704	0.589512233869084	0.999971315249418	ENSMUSG00000102117
Kifap3	230.682016248733	-0.0268435623848886	0.115756776884114	-0.231896249251671	0.816618597796615	0.999971315249418	ENSMUSG00000026585
Scyl3	879.904324745837	-0.00383414687999546	0.127017151800913	-0.0301860561792876	0.975918669021933	0.999971315249418	ENSMUSG00000026584
BC055324	626.342096807853	-0.0671195639658029	0.123253881484379	-0.544563490881295	0.586053770275228	0.999971315249418	ENSMUSG00000041406
Mettl18	441.72431648807	-0.0707813564998495	0.235909540478587	-0.300036006836587	0.764149690632945	0.999971315249418	ENSMUSG00000041396
Sell	4248.04067673307	-0.052269791658887	0.155515325003591	-0.336107014904672	0.736790168715127	0.999971315249418	ENSMUSG00000026581
Slc19a2	375.763153144886	0.221597887764225	0.129511307657053	1.71103119699028	0.0870753539466738	0.999971315249418	ENSMUSG00000040918
Ccdc181	586.533594606139	0.0995545033613977	0.140018369193686	0.711010304824256	0.47707785013287	0.999971315249418	ENSMUSG00000026578
Blzf1	587.981604300065	-0.0133946672527777	0.0987788309897276	-0.135602609573003	0.892135442370291	0.999971315249418	ENSMUSG00000026577
Nme7	471.286521724002	-0.0740050292695782	0.0978900702644152	-0.756001390842605	0.449648361811874	0.999971315249418	ENSMUSG00000026575
Atp1b1	50.0880048899842	0.215835118765341	0.326783769639207	0.660482982382016	0.508943935621008	0.999971315249418	ENSMUSG00000026576
Gm16550	7.19553687470723	0.520592881289907	0.586581204010205	0.887503516530765	0.374807873781267	0.999971315249418	ENSMUSG00000089967
Sft2d2	1486.24152181162	0.223114994504442	0.158268232072495	1.4097269653094	0.158620319292997	0.999971315249418	ENSMUSG00000040848
Tiprl	1296.83663870249	-0.146779918911775	0.161179936144992	-0.910658748367645	0.362475205782102	0.999971315249418	ENSMUSG00000040843
Gm38190	19.1415105607701	-0.100274778532603	0.72964650139641	-0.13742925970411	0.890691504561771	0.999971315249418	ENSMUSG00000102302
Dcaf6	435.138525940735	0.0255233472130576	0.144793913445294	0.176273619558607	0.860078986044775	0.999971315249418	ENSMUSG00000026571
Mpc2	804.63721280926	-0.0822355852804009	0.299481488687374	-0.274593216565201	0.783628778474304	0.999971315249418	ENSMUSG00000026568
Mpzl1	96.9946918561827	-0.161631336978798	0.231818635647948	-0.697231853371185	0.485657707545175	0.999971315249418	ENSMUSG00000026566
Rcsd1	2443.10499276748	0.0505112250664824	0.216448494609393	0.23336371619325	0.81547898568278	0.999971315249418	ENSMUSG00000040723
Creg1	350.37335227723	-0.050740824571302	0.2169279107289	-0.233906390380139	0.815057652013915	0.999971315249418	ENSMUSG00000040713
Pou2f1	420.494352688001	0.253105476685933	0.172986104918504	1.46315495574153	0.143424983104979	0.999971315249418	ENSMUSG00000026565
Gm15853	14.0097258835515	0.198269459171511	0.359255153318767	0.551890369114863	0.581023467201011	0.999971315249418	ENSMUSG00000103400
Tada1	360.906962367455	-0.315590777784454	0.225093717868375	-1.40204169522402	0.160902796155043	0.999971315249418	ENSMUSG00000026563
Pogk	310.46127633194	0.18756087264359	0.277789861197431	0.67518977055209	0.49955520491197	0.999971315249418	ENSMUSG00000040596
Gm6286	408.743628140942	0.371555249260081	0.190398283301219	1.95146323179953	0.0510019659413101	0.999971315249418	ENSMUSG00000086925
Uck2	3226.59115737133	-0.13159961487808	0.111626529287813	-1.17892776670292	0.238426940041918	0.999971315249418	ENSMUSG00000026558
Tmco1	2619.98747670752	-0.0743951591170739	0.101124071490857	-0.735681999550426	0.461924246739212	0.999971315249418	ENSMUSG00000052428
Aldh9a1	1456.21709801757	-0.0580701714749266	0.148361359374127	-0.391410349163016	0.69549394377507	0.999971315249418	ENSMUSG00000026687
Mgst3	10.4534054286577	-0.203432646356885	0.392772009019797	-0.517940794367125	0.604499578259428	0.999971315249418	ENSMUSG00000026688
Pbx1	20.9019201062689	-0.304179533107844	0.262443956294795	-1.15902662573098	0.246445332162097	0.999971315249418	ENSMUSG00000052534
Nuf2	4063.15667140663	-0.096950684273484	0.119710622671755	-0.809875365357685	0.418011811598301	0.999971315249418	ENSMUSG00000026683
Hsd17b7	532.717210392237	-0.164725559978368	0.237472223142661	-0.693662432592839	0.487893930685124	0.999971315249418	ENSMUSG00000026675
3110045C21Rik	25.7886355728812	-0.0156312896674682	0.248083544454182	-0.063008168082487	0.949760000057953	0.999971315249418	ENSMUSG00000097503
Uap1	1072.88052258043	-0.112925638224264	0.120883973540586	-0.93416550529215	0.350218526257761	0.999971315249418	ENSMUSG00000026670
Uhmk1	2212.51545534389	0.08351488094945	0.222887382777659	0.374695417518362	0.707887000682585	0.999971315249418	ENSMUSG00000026667
Gm7299	14.1753539117902	0.192663645817255	0.471204700539233	0.408874626243703	0.682631670765805	0.999971315249418	ENSMUSG00000102193
Olfml2b	10.160667701662	0.0326458434925949	0.457792492455146	0.0713114435702405	0.943149887766037	0.999971315249418	ENSMUSG00000038463
Atf6	2175.20571204421	0.0854446750040513	0.11474705296918	0.744635028029881	0.456492386411507	0.999971315249418	ENSMUSG00000026663
Gm9929	30.6713603956926	-0.020266871031241	0.26142355765243	-0.077525037197246	0.938205874404209	0.999971315249418	ENSMUSG00000053925
Dusp12	263.109802500509	-0.251032949735069	0.211556046610259	-1.18660257533332	0.23538441961241	0.999971315249418	ENSMUSG00000026659
Gm26620	6.19860437820398	-0.444658250028374	0.622376575822921	-0.714452097494891	0.474947666938467	0.999971315249418	ENSMUSG00000096968
Fcrlb	12.737619266445	0.0527181562047526	0.411711575640698	0.128046329818912	0.898112308890121	0.999971315249418	ENSMUSG00000070524
Fcrla	123.826968967267	-0.17121802004028	0.147743805189383	-1.15888459635115	0.246503228465028	0.999971315249418	ENSMUSG00000038421
Gm2962	79.4762110046087	0.0860356482055956	0.333515009474817	0.257966345625869	0.796432880652851	0.999971315249418	ENSMUSG00000089838
Fcgr2b	2342.93864110888	-0.0371516510345509	0.0973161286488689	-0.38176252539391	0.702637517591509	0.999971315249418	ENSMUSG00000026656
Fcgr4	75.5910189101931	0.192238213680067	0.216725974029936	0.887010495814007	0.375073249689557	0.999971315249418	ENSMUSG00000059089
Fcgr3	25.2795919041361	0.0733896175064426	0.346589723053851	0.211747817736187	0.832303780697567	0.999971315249418	ENSMUSG00000059498
Cfap126	21.814905236062	0.448388119867801	0.324123622376375	1.38338611848268	0.16654650464048	0.999971315249418	ENSMUSG00000026649
Sdhc	2900.80533758887	-0.0305801915324652	0.267826222689989	-0.114179228700328	0.90909571731016	0.999971315249418	ENSMUSG00000058076
Tomm40l	195.625250388625	-0.0268956339430732	0.159701808465573	-0.168411580316394	0.866259498446033	0.999971315249418	ENSMUSG00000005674
Apoa2	12.037698189678	0.132511333667377	0.403344758998729	0.328531190032879	0.742510065534006	0.999971315249418	ENSMUSG00000005681
Fcer1g	8.33196276132006	-0.275134577707475	0.409210208004404	-0.672355118043668	0.501357648275968	0.999971315249418	ENSMUSG00000058715
Ndufs2	4963.02378354018	-0.0307885097985651	0.107982045985395	-0.285126194059422	0.775547462651788	0.999971315249418	ENSMUSG00000013593
B4galt3	151.165595153052	-0.0823076985682935	0.151017587511095	-0.545020615974589	0.585739338685717	0.999971315249418	ENSMUSG00000052423
Ppox	240.627259159518	0.00786531049389148	0.107682685391386	0.0730415522728101	0.941773051866425	0.999971315249418	ENSMUSG00000062729
Usp21	528.572438916583	-0.0795989387953892	0.109831433475144	-0.724737320426612	0.468613195040375	0.999971315249418	ENSMUSG00000053483
Ufc1	1868.57127750526	0.0948845031462004	0.315270257951209	0.300962430654923	0.763443143055921	0.999971315249418	ENSMUSG00000062963
Rpl27-ps1	327.676684159142	0.762636415143351	0.417337355346138	1.82738593939386	0.0676417619168317	0.999971315249418	ENSMUSG00000079137
Gm20045	40.8770149202442	0.178400341988996	0.302828286440192	0.589113864117941	0.555784893645455	0.999971315249418	ENSMUSG00000103983
Dedd	104.479759830136	0.021896475604016	0.158442973771085	0.138197832840802	0.890084067806648	0.999971315249418	ENSMUSG00000013973
Nit1	389.579632574536	0.0476734131351474	0.0772841045136301	0.616859229141221	0.537327580897076	0.999971315249418	ENSMUSG00000013997
Pfdn2	3270.64319454535	0.122915883965609	0.221586771421527	0.554707680323501	0.579094622022946	0.999971315249418	ENSMUSG00000006412
Nectin4	11.1813187603729	0.760311662115429	0.445669995017009	1.70599697223595	0.0880086433206674	0.999971315249418	ENSMUSG00000006411
Arhgap30	11853.9874827037	0.198183094665532	0.14236502450142	1.39207712961519	0.163899042974051	0.999971315249418	ENSMUSG00000048865
Usf1	1831.3416703339	0.150912179715813	0.236067793379597	0.639274750508412	0.52264421127105	0.999971315249418	ENSMUSG00000026641
Tstd1	22.6136857951034	-0.109324764284453	0.306302106533359	-0.356918094758669	0.721153123018401	0.999971315249418	ENSMUSG00000103711
F11r	9.78461259669372	-0.0859782183125658	0.563468755535403	-0.152587375019348	0.878723681679191	0.999971315249418	ENSMUSG00000038235
B930036N10Rik	14.0127240159392	0.802552254454654	0.622490145971836	1.28926097810224	0.197307372148441	0.999971315249418	ENSMUSG00000091993
Alyref2	115.414494966918	-0.183630377544414	0.376652933893761	-0.48753205144609	0.625881334887401	0.999971315249418	ENSMUSG00000060244
ENSMUSG00000038209	6.21659060423147	-0.516298238993175	0.661194420676793	-0.780856920215231	0.434886651903872	0.999971315249418	ENSMUSG00000038209
Cd244a	27.9382178606858	0.154138825940199	0.328217579204104	0.469623919334152	0.638623732383151	0.999971315249418	ENSMUSG00000004709
Ly9	2148.1900343365	-0.0166517666921494	0.0872022636243477	-0.190955670186296	0.848560324058652	0.999971315249418	ENSMUSG00000004707
Slamf7	1648.84463618194	-0.00356490472573634	0.148090641431655	-0.024072451110164	0.980794817782219	0.999971315249418	ENSMUSG00000038179
Gm37787	23.976387787298	0.0744200126097577	0.408339856656514	0.182250180570441	0.855386393958722	0.999971315249418	ENSMUSG00000103219
A630035G10Rik	15.1498313965787	0.490650402306151	0.330010944210404	1.48677009327706	0.137075542826158	0.999971315249418	ENSMUSG00000103083
Gm37010	6.61433816067928	1.35910140186964	0.728364380396572	1.86596357324565	0.0620464620678046	0.999971315249418	ENSMUSG00000103883
Tma7-ps	89.1403567174156	-0.270246196772367	0.235808014858997	-1.14604330533024	0.251777234135612	0.999971315249418	ENSMUSG00000059058
Slamf1	254.054105704851	-0.207999668141519	0.156590538344875	-1.32830291242387	0.184078057997545	0.999971315249418	ENSMUSG00000015316
Cd84	664.313261764989	-0.068119197535219	0.146424795659426	-0.465216271796338	0.641776587254839	0.999971315249418	ENSMUSG00000038147
ENSMUSG00000073492	15.3712178176151	0.199574018863663	0.367806310600057	0.54260629334518	0.587400904970597	0.999971315249418	ENSMUSG00000073492
Gm37065	44.6964780110882	0.0451772004729994	0.263100966856589	0.171710507235135	0.863665124931736	0.999971315249418	ENSMUSG00000104413
Slamf6	2273.54728487038	0.00792210282594833	0.0786253989970791	0.100757553246154	0.919742922901655	0.999971315249418	ENSMUSG00000015314
Vangl2	177.232760693947	0.391010169715788	0.205484893965664	1.90286576385087	0.0570580632943864	0.999971315249418	ENSMUSG00000026556
Ncstn	783.288565260462	-0.0914066206933267	0.196840762647647	-0.464368352692008	0.64238385993279	0.999971315249418	ENSMUSG00000003458
Copa	4759.89811992743	0.049087076587259	0.262209693406175	0.187205423070385	0.851499573013328	0.999971315249418	ENSMUSG00000026553
Pex19	647.364044426094	-0.0818984858310042	0.0936411486757219	-0.874599329346306	0.38179195282726	0.999971315249418	ENSMUSG00000003464
Gm10171	1660.51466250512	-0.237737375221627	0.23669078115605	-1.00442177790139	0.315175357283185	0.999971315249418	ENSMUSG00000089803
Dcaf8	3145.4126917386	0.0692330844246311	0.174418415735889	0.396936780629097	0.691414080505008	0.999971315249418	ENSMUSG00000026554
Pea15a	311.279477144034	0.0502436544215941	0.151772019642762	0.331046885584423	0.740609070722459	0.999971315249418	ENSMUSG00000013698
Igsf8	361.005160307311	-0.0294083758928656	0.10699478318589	-0.27485803529105	0.783425308774517	0.999971315249418	ENSMUSG00000038034
Pigm	1035.23788466831	-0.0888212737906051	0.095502505864796	-0.930041290396614	0.352349706340085	0.999971315249418	ENSMUSG00000050229
Gm37145	26.3086985196392	-0.127188832030045	0.285336586190849	-0.445750170799949	0.655777719404817	0.999971315249418	ENSMUSG00000102278
Slamf9	17.9070713003039	0.247115475239641	0.488890429679349	0.505461879058909	0.613234466714157	0.999971315249418	ENSMUSG00000026548
Igsf9	24.4317624266066	-0.295322778469299	0.482579862109072	-0.611966643569868	0.54055982708172	0.999971315249418	ENSMUSG00000037995
Tagln2	4139.47034513483	-0.0911205862750347	0.0724192926841297	-1.25823634694244	0.208306293652925	0.999971315249418	ENSMUSG00000026547
Cfap45	9.46510675976748	0.620524060291989	0.433945383068664	1.42995889460541	0.152728817042568	0.999971315249418	ENSMUSG00000026546
Dusp23	36.0258094111773	0.207493076772282	0.360273674894541	0.575931829693134	0.564661260226846	0.999971315249418	ENSMUSG00000026544
Gm2710	878.463629852825	-0.160441607714406	0.215063445986465	-0.746019887194141	0.455655401679246	0.999971315249418	ENSMUSG00000060128
Aim2	1510.14518519769	-0.0791586327421481	0.111598791380414	-0.709314426823091	0.478129377661908	0.999971315249418	ENSMUSG00000037860
Ifi206	1644.36987709867	0.415049105250137	0.212983393985403	1.94873927719728	0.0513265686707924	0.999971315249418	ENSMUSG00000037849
Ifi209	2872.38803470228	0.315906284430282	0.193823848089596	1.62986282412603	0.103130492296153	0.999971315249418	ENSMUSG00000043263
Ifi208	274.586721331842	0.596214601732109	0.303693589073192	1.96321102316196	0.0496216590408255	0.999971315249418	ENSMUSG00000066677
Gm18752	8.64771381412805	0.775633938830955	0.465485933063383	1.66628867542028	0.0956559312125611	0.999971315249418	ENSMUSG00000103105
Ifi207	125.697279013403	0.554369154983455	0.278800746039844	1.98840628247181	0.0467667745395152	0.999971315249418	ENSMUSG00000073490
Ifi204	288.756932318815	0.369706669400676	0.24280260098625	1.5226635460203	0.12784290263155	0.999971315249418	ENSMUSG00000073489
Ifi203-ps	15.8982717782791	0.426206534393942	0.345343695046829	1.23415177548311	0.217146353443368	0.999971315249418	ENSMUSG00000090222
Mndal	12178.3207874479	0.0994295689913583	0.131951402382238	0.753531733625155	0.45113044938886	0.999971315249418	ENSMUSG00000090272
Ifi211	2498.1005587436	0.133639726225942	0.191244324324393	0.698790548153779	0.48468293627434	0.999971315249418	ENSMUSG00000026536
Ifi203	3655.33251295546	0.239619319741089	0.149964278389935	1.59784264835413	0.110078000459009	0.999971315249418	ENSMUSG00000039997
Ifi205	890.730697645681	0.167249964989344	0.261355018649574	0.639934009507557	0.522215502329428	0.999971315249418	ENSMUSG00000054203
Fmn2	15.6649056244488	0.386585360881004	0.366805853287443	1.05392364221097	0.291917877706506	0.999971315249418	ENSMUSG00000028354
Fh1	2871.24648199316	-0.181338356793773	0.105238447935543	-1.72311888241491	0.084867028827368	0.999971315249418	ENSMUSG00000026526
Kmo	1124.25138782485	0.0181802864049178	0.1582306147112	0.114897401100919	0.908526445074318	0.999971315249418	ENSMUSG00000039783
Opn3	42.6701616249869	-0.411221617722334	0.243863303269912	-1.68627920727862	0.0917420339822568	0.999971315249418	ENSMUSG00000026525
Chml	397.040175250227	-0.106877961834068	0.181647969299014	-0.588379612756003	0.556277518872604	0.999971315249418	ENSMUSG00000078185
Cep170	1064.63769121582	0.107157100604869	0.291170773704764	0.36802148526597	0.712857213835	0.999971315249418	ENSMUSG00000057335
Gm38104	12.740220439416	-0.480878197231933	1.18560811303359	-0.405596243771917	0.685039289244823	0.999971315249418	ENSMUSG00000104154
Akt3	482.065651647646	0.0437530838291325	0.286158513774911	0.152898067759564	0.878478659698362	0.999971315249418	ENSMUSG00000019699
ENSMUSG00000097892	8.33724103439018	0.126899005305043	0.490937967592186	0.258482769070442	0.796034345489368	0.999971315249418	ENSMUSG00000097892
Zbtb18	2602.51224022936	-0.0898301339518474	0.16141060147986	-0.55653180849497	0.577847355893163	0.999971315249418	ENSMUSG00000063659
Adss	6094.42362316651	-0.202909589348825	0.130562586652328	-1.55411741258733	0.120156412455698	0.999971315249418	ENSMUSG00000015961
Desi2	702.926857254842	0.010665201773538	0.198523408044703	0.0537226409650215	0.957156143966026	0.999971315249418	ENSMUSG00000026502
Gm37486	28.910497650252	0.0618931383135161	0.244336947026448	0.253310598608799	0.800028206633317	0.999971315249418	ENSMUSG00000104126
B230369F24Rik	13.5502951338819	-0.507195508614018	0.599351244267572	-0.846240853698115	0.397418395600359	0.999971315249418	ENSMUSG00000086350
Cox20	16.5991759670522	-0.0386702198884021	0.336685724236862	-0.114855537685932	0.908559627574716	0.999971315249418	ENSMUSG00000026500
Hnrnpu	67868.7230379149	-0.0864528090804964	0.124601899187826	-0.693832193923281	0.487787450438373	0.999971315249418	ENSMUSG00000039630
ENSMUSG00000104279	6.317397460009	0.404561817689712	0.594927484261719	0.680018705459131	0.496492616951075	0.999971315249418	ENSMUSG00000104279
Efcab2	487.838631493433	0.115080495881675	0.18733255478048	0.614311249940133	0.539009669875669	0.999971315249418	ENSMUSG00000026495
Smyd3	414.369876340073	0.0217510869598921	0.130561539921603	0.166596433934165	0.867687599794271	0.999971315249418	ENSMUSG00000055067
Gm5561	684.356370142488	0.656297593548582	0.546278733762716	1.20139692978357	0.229597266522733	0.999971315249418	ENSMUSG00000096474
Tfb2m	943.750205465215	-0.247432506118658	0.134945603240733	-1.83357219632607	0.0667175225680756	0.999971315249418	ENSMUSG00000026492
Cnst	377.514466108871	-0.022703347588295	0.224422436511507	-0.101163448455524	0.91942071172765	0.999971315249418	ENSMUSG00000038949
Sccpdh	137.743692189455	0.152893284514687	0.202549445375803	0.754844251639469	0.450342438764977	0.999971315249418	ENSMUSG00000038936
Ahctf1	4592.82423428731	-0.107858947104094	0.0848266137692973	-1.2715224893621	0.203542831927266	0.999971315249418	ENSMUSG00000026491
Gm37070	43.6128838238798	0.486971582209409	0.466785333952841	1.04324524955749	0.296834721266327	0.999971315249418	ENSMUSG00000104418
Cdc42bpa	35.5962650911574	0.0123520063174347	0.340434934362561	0.0362830164317977	0.971056691947104	0.999971315249418	ENSMUSG00000026490
Coq8a	342.870454127902	0.198135449350611	0.133753670700716	1.4813458824166	0.138514427801724	0.999971315249418	ENSMUSG00000026489
Psen2	890.202826278345	0.14967250353058	0.211190427441801	0.70870874851478	0.478505234726885	0.999971315249418	ENSMUSG00000010609
Gm5069	10.8585947010944	0.385471473678621	0.412485655769554	0.934508796334909	0.350041500667552	0.999971315249418	ENSMUSG00000055676
Itpkb	841.060648419619	0.0578978227848713	0.234157848808546	0.247259799658521	0.80470716820155	0.999971315249418	ENSMUSG00000038855
Gm37033	19.4586720634237	1.06636528454073	0.976117137864177	1.0924562669538	0.274632602920411	0.999971315249418	ENSMUSG00000104388
Parp1	8625.26410477483	-0.00513586068037122	0.214744842073313	-0.0239161072777611	0.980919526208069	0.999971315249418	ENSMUSG00000026496
Lin9	816.520732319166	-0.211465863395043	0.153092831143278	-1.38129174185259	0.16718927633081	0.999971315249418	ENSMUSG00000058729
Gm8101	15.8522190247761	0.667597237194698	0.634559506310511	1.05206403899971	0.292770169599463	0.999971315249418	ENSMUSG00000104202
Acbd3	1750.55022446584	0.035073918145129	0.136301988999198	0.257325064752616	0.796927844892787	0.999971315249418	ENSMUSG00000026499
Gm37768	11.4560798340419	0.337263963049613	0.502164642304757	0.671620290711213	0.501825457441772	0.999971315249418	ENSMUSG00000103649
H3f3a	26689.2011784076	-0.0957582921160558	0.176376864954496	-0.54291866532927	0.587185803940683	0.999971315249418	ENSMUSG00000060743
Sde2	1459.58924700466	0.142986110692233	0.221780523897521	0.644718968913174	0.519109321418107	0.999971315249418	ENSMUSG00000038806
Gm20305	34.3956388248409	0.406136673620024	0.367899644408671	1.10393331386012	0.269622066401537	0.999971315249418	ENSMUSG00000103979
Pycr2	1060.5345432672	-0.023835389386647	0.242876664237545	-0.0981378324734187	0.921822846536915	0.999971315249418	ENSMUSG00000026520
Tmem63a	191.730636934521	0.150835451912749	0.13256980325337	1.13778136657916	0.25521178751266	0.999971315249418	ENSMUSG00000026519
Ephx1	107.274483751347	0.182683749058414	0.241904805099785	0.755188591574514	0.450135832867948	0.999971315249418	ENSMUSG00000038776
Nvl	2511.8931952098	-0.0542113897001123	0.148622075427649	-0.364760009871502	0.715290558805012	0.999971315249418	ENSMUSG00000026516
Cnih4	1238.3308064134	0.0452934154206587	0.195677093623827	0.231470197057054	0.816949536093446	0.999971315249418	ENSMUSG00000062169
Wdr26	8095.19281750896	-0.00746779735083292	0.0751862925083957	-0.0993239206468257	0.920881086392575	0.999971315249418	ENSMUSG00000038733
ENSMUSG00000054135	6.74323164971635	0.183462753149226	0.510717502967976	0.359225505456644	0.719426397704131	0.999971315249418	ENSMUSG00000054135
Rpl35a-ps2	2008.1833286651	0.268026942052565	0.375410126436392	0.713957677691941	0.475253350144562	0.999971315249418	ENSMUSG00000081214
Dnah14	26.2835388920431	0.356875802970105	0.282790277942944	1.26198045267351	0.206955820250491	0.999971315249418	ENSMUSG00000047369
Lbr	3335.65451173904	-0.0216137924699027	0.290279667775511	-0.0744585131832857	0.940645551176048	0.999971315249418	ENSMUSG00000004880
Enah	29.4904992460091	-0.000622985248892194	0.332060394628918	-0.00187612030512819	0.998503073452483	0.999971315249418	ENSMUSG00000022995
Srp9	6618.40654208643	0.0358705038442915	0.266079100574971	0.134811429258363	0.892760969093728	0.999971315249418	ENSMUSG00000026511
Degs1	799.886868746091	-0.0630995982089699	0.0991338730691876	-0.636508957588405	0.524444744417999	0.999971315249418	ENSMUSG00000038633
Fbxo28	459.831120380053	0.00293025455419225	0.140729050401584	0.0208219592602272	0.983387680578826	0.999971315249418	ENSMUSG00000047539
Trp53bp2	472.346049839799	0.00835496276322657	0.129943308422681	0.0642969835433886	0.948733755270673	0.999971315249418	ENSMUSG00000026510
Capn2	751.128015898389	0.0915488468038711	0.118868492453212	0.770169158491731	0.441199556177617	0.999971315249418	ENSMUSG00000026509
Disp1	147.568559548157	0.0459330698267481	0.238306048752536	0.192748233069176	0.847156147141959	0.999971315249418	ENSMUSG00000030768
BC085271	496.236337557971	0.135701208133113	0.178279042905466	0.761173079693219	0.446553695218033	0.999971315249418	ENSMUSG00000102478
Brox	840.315450714343	0.0908114532941825	0.156479604699051	0.580340508073467	0.561685015488764	0.999971315249418	ENSMUSG00000046836
Aida	2661.70391736564	0.00197211098296498	0.127392682304643	0.0154805672295127	0.987648787740878	0.999971315249418	ENSMUSG00000042901
Mia3	2577.31360538296	0.0752472586158836	0.289183714949427	0.260205726415275	0.79470508732766	0.999971315249418	ENSMUSG00000056050
Taf1a	517.881846785781	-0.0514146064585994	0.0783208422719796	-0.656461357757814	0.511527322863749	0.999971315249418	ENSMUSG00000072258
Dusp10	888.909940786308	0.00805475211027755	0.170528038731298	0.0472341801981871	0.962326586054949	0.999971315249418	ENSMUSG00000039384
1700056E22Rik	104.207581951657	-0.0470336455176488	0.368105140271469	-0.127772313863812	0.898329160779256	0.999971315249418	ENSMUSG00000044854
Hlx	445.565402332302	0.245583691639359	0.129780744387017	1.89229683339625	0.0584514426219725	0.999971315249418	ENSMUSG00000039377
Mtarc2	2066.53939111298	0.00658383778323643	0.213030897201743	0.0309055534653335	0.975344861015369	0.999971315249418	ENSMUSG00000073481
Rab3gap2	1265.04835020024	0.0227071344778087	0.120611441282145	0.188266836350045	0.850667481225503	0.999971315249418	ENSMUSG00000039318
Iars2	2869.85639712433	-0.0275816353322221	0.05903642023134	-0.467196947649277	0.640358977270066	0.999971315249418	ENSMUSG00000026618
Bpnt1	869.337454802444	-0.202861777651231	0.162671698702904	-1.24706251467705	0.212374576272491	0.999971315249418	ENSMUSG00000026617
4930532G15Rik	8.55752995830495	-0.422457560070967	0.397171659985909	-1.0636649152811	0.287480523594684	0.999971315249418	ENSMUSG00000097261
Eprs	16468.518094159	0.042924090437348	0.0913554539560343	0.469857995101263	0.638456476442802	0.999971315249418	ENSMUSG00000026615
Gm9722	186.690031698614	0.199879520288989	0.181961061484019	1.09847413869117	0.271997504299122	0.999971315249418	ENSMUSG00000102546
Lyplal1	11.7624809779348	0.0791978814783623	0.569208802422592	0.139136782743504	0.889342062476795	0.999971315249418	ENSMUSG00000039246
Rrp15	5395.53509694982	-0.0637143160334027	0.244808154853437	-0.260262228893263	0.794661505848027	0.999971315249418	ENSMUSG00000001305
Gpatch2	660.661904302356	0.0170275355500565	0.114017726413153	0.149341125154135	0.881284465926918	0.999971315249418	ENSMUSG00000039210
Gm37254	135.563173969909	0.272296684044493	0.307020603764029	0.886900360126241	0.375132547762718	0.999971315249418	ENSMUSG00000104394
Gm38155	23.0409971164478	0.297082368956239	0.52454123147814	0.566366095033313	0.571144938064344	0.999971315249418	ENSMUSG00000104245
Kctd3	729.530379675156	-0.0193264779995127	0.1634559995035	-0.118236577783729	0.905880208335837	0.999971315249418	ENSMUSG00000026608
Pdcd5-ps	403.963415182156	0.039706611492336	0.270333338726534	0.146880187546911	0.883226590346868	0.999971315249418	ENSMUSG00000102824
Cenpf	3222.35486268653	0.21099589393875	0.237075656381719	0.889993924973141	0.373469148098018	0.999971315249418	ENSMUSG00000026605
Ptpn14	7.29046697231166	0.437294916288269	0.433322052804064	1.00916838517333	0.31289388585886	0.999971315249418	ENSMUSG00000026604
Gm37422	39.6388906469659	0.0950473651329443	0.23146155513391	0.410639966010577	0.681336553566074	0.999971315249418	ENSMUSG00000104435
Smyd2	484.108496208288	-0.0836290408973456	0.101310562615138	-0.82547208048818	0.40910362716691	0.999971315249418	ENSMUSG00000026603
Rps6kc1	165.761009479525	0.00140256872142235	0.155671544583481	0.00900979511172127	0.992811320843017	0.999971315249418	ENSMUSG00000089872
Angel2	1106.75214345973	-0.0230272441122529	0.093895617383708	-0.245243012974196	0.806268273515717	0.999971315249418	ENSMUSG00000026634
Vash2	6.94362213910151	0.240574956912509	0.54666682724622	0.440076011424328	0.659882055465429	0.999971315249418	ENSMUSG00000037568
Flvcr1	577.142008944965	-0.0873989382213063	0.128263168262687	-0.681403238397404	0.495616374324201	0.999971315249418	ENSMUSG00000066595
Tatdn3	71.8990909420222	-0.00361799452822483	0.20525901470218	-0.0176264829755436	0.985936829597534	0.999971315249418	ENSMUSG00000026632
Nsl1	655.231027043267	0.0597821060040508	0.102500273756293	0.583238500866741	0.559732756302129	0.999971315249418	ENSMUSG00000062510
Batf3	451.463014228904	0.425929161664132	0.266808629009534	1.5963845069228	0.110402973037964	0.999971315249418	ENSMUSG00000026630
Atf3	1320.39940615141	0.137580756305512	0.19089776640239	0.720703855777485	0.47109173960887	0.999971315249418	ENSMUSG00000026628
D730003I15Rik	93.4679515998912	0.169322039817106	0.274078786227227	0.617786010175659	0.536716406501027	0.999971315249418	ENSMUSG00000073478
Nenf	373.648808248567	0.343837917500765	0.354891846732199	0.968852681927697	0.332618697125173	0.999971315249418	ENSMUSG00000037499
Pacc1	470.037031462697	-0.0220951779729844	0.12977123976841	-0.170262517430022	0.864803687568717	0.999971315249418	ENSMUSG00000026627
Ppp2r5a	5518.23466925654	0.0340359044286423	0.113671055410034	0.299424548367815	0.764616133970203	0.999971315249418	ENSMUSG00000026626
9430037O13Rik	11.3843502568184	-0.346330776231092	0.382349027079587	-0.905797456518708	0.365043067527746	0.999971315249418	ENSMUSG00000102246
Dtl	1490.02360694768	-0.135287207137094	0.102582645683028	-1.31881183446097	0.187232026822623	0.999971315249418	ENSMUSG00000037474
Ints7	1812.18122594867	-0.140756695283224	0.100344797808313	-1.40273036926248	0.16069725763946	0.999971315249418	ENSMUSG00000037461
Lpgat1	2979.62085489782	-0.0867236268139218	0.179758697560251	-0.482444677175378	0.629490089762658	0.999971315249418	ENSMUSG00000026623
Gm38037	59.085161392932	0.0472088162419633	0.283526651096569	0.166505744907501	0.867758962498217	0.999971315249418	ENSMUSG00000102840
Nek2	3157.06076872217	-0.0806937690858257	0.200566353786954	-0.402329541133008	0.687441516607853	0.999971315249418	ENSMUSG00000026622
Slc30a1	276.634217646789	0.0149699488133645	0.107881236172922	0.138763230237456	0.889637250837262	0.999971315249418	ENSMUSG00000037434
Traf5	540.151907223485	-0.00537796571246302	0.137736124852982	-0.0390454263048522	0.968854171253614	0.999971315249418	ENSMUSG00000026637
Gstp-ps	124.330804021287	0.22423837365327	0.424183666741268	0.528635096622062	0.597058608755179	0.999971315249418	ENSMUSG00000103653
Rcor3	125.802418979417	0.0562316741087271	0.228825626969382	0.245740282036903	0.805883287574833	0.999971315249418	ENSMUSG00000037395
Hhat	23.5481783105944	0.033363793711008	0.291478680141669	0.114463924753577	0.908870042275692	0.999971315249418	ENSMUSG00000037375
Utp25	698.425408077766	0.00646062538102604	0.236430037505833	0.027325738510982	0.97819992816766	0.999971315249418	ENSMUSG00000016181
A130010J15Rik	349.749174175571	-0.218601823632047	0.166457977493307	-1.3132553147886	0.189096930414241	0.999971315249418	ENSMUSG00000079144
Traf3ip3	3206.40435006388	0.114599965966591	0.114086784901048	1.00449816397217	0.315138555765317	0.999971315249418	ENSMUSG00000037318
4930570N18Rik	16.1879691916376	0.136592032032147	0.422955898388373	0.322946275374374	0.74673592970137	0.999971315249418	ENSMUSG00000089683
Lamb3	121.456092402189	0.132553734114289	0.202942868495386	0.653157881807033	0.513654499975477	0.999971315249418	ENSMUSG00000026639
Hsd11b1	30.0784652501838	-0.129676621227962	0.28316696821945	-0.457951088163167	0.646987581872031	0.999971315249418	ENSMUSG00000016194
Gm37691	65.6898204358562	0.107776006425413	0.177110710767314	0.608523369131573	0.542840411522215	0.999971315249418	ENSMUSG00000104348
Cd46	22.7159178031756	-0.322135006335336	0.311144090142968	-1.03532420039641	0.300517531657211	0.999971315249418	ENSMUSG00000016493
Cr1l	1595.13545686618	-0.0740433693816571	0.0878665085365742	-0.84268022725447	0.399407308465021	0.999971315249418	ENSMUSG00000016481
Cr2	315.743052416711	-0.114815400540746	0.141755715310638	-0.809952531995932	0.41796745792362	0.999971315249418	ENSMUSG00000026616
Nmt2	1426.45714503971	0.0915825267580724	0.243745625942647	0.375729929117259	0.707117685271298	0.999971315249418	ENSMUSG00000026643
Rpp38	483.050211087258	-0.170898464150961	0.13899123322296	-1.22956290255241	0.218860829100512	0.999971315249418	ENSMUSG00000049950
Dclre1c	254.419194128789	0.177226649154191	0.234872428981266	0.754565573843182	0.450509686332636	0.999971315249418	ENSMUSG00000026648
Suv39h2	680.303434821001	-0.0439040141262888	0.0957661620443381	-0.458450178946943	0.646629048142966	0.999971315249418	ENSMUSG00000026646
ENSMUSG00000109865	2848.33848338582	-0.0190449966196913	0.0821292138577335	-0.231890647981625	0.816622948400795	0.999971315249418	ENSMUSG00000109865
Gm45902	234.315645781147	0.153504653259085	0.10754995999106	1.42728693968687	0.153497203571969	0.999971315249418	ENSMUSG00000051396
Cdnf	21.4294276856522	0.355311634732225	0.277037970770292	1.28253767432781	0.199654097775838	0.999971315249418	ENSMUSG00000039496
Fam107b	5173.75090905998	0.0650571323372306	0.132835931592769	0.489755531934495	0.624306900846286	0.999971315249418	ENSMUSG00000026655
Frmd4a	24.2185168350343	0.0719942005834836	0.290980175854134	0.247419606411859	0.804583502066439	0.999971315249418	ENSMUSG00000026657
Prpf18	1918.92454625464	-0.0136375303794176	0.109574367628778	-0.124459129215507	0.900951758874616	0.999971315249418	ENSMUSG00000039449
Gm13196	26.3642129119974	0.470344943629064	0.425383054050662	1.10569741589435	0.268857508883907	0.999971315249418	ENSMUSG00000083378
Sephs1	2083.24162259653	-0.0477738312980747	0.0912727918628932	-0.523418099994563	0.600683331182632	0.999971315249418	ENSMUSG00000026662
Phyh	600.919897309493	0.0173275911495923	0.172029991370862	0.100724245880112	0.919769363822918	0.999971315249418	ENSMUSG00000026664
Gm13192	215.366673930267	0.324974103499271	0.33911304207677	0.958306119720698	0.337908418819507	0.999971315249418	ENSMUSG00000069188
Mcm10	2838.8143893186	-0.0568862142611836	0.141925072310963	-0.400818638559817	0.688553655282651	0.999971315249418	ENSMUSG00000026669
Optn	847.646731038543	0.137473622467843	0.108831840719066	1.26317465145804	0.206526420454019	0.999971315249418	ENSMUSG00000026672
Camk1d	199.325495937282	0.12819918372945	0.192853660646823	0.66474851086298	0.506211360335252	0.999971315249418	ENSMUSG00000039145
Gm13216	12.1568367344126	1.03897639006407	0.524131034116174	1.98228367037274	0.0474475006256492	0.999971315249418	ENSMUSG00000082013
Cdc123	2827.26375714521	0.0215807410779845	0.207594999554759	0.103955977380332	0.917204284176696	0.999971315249418	ENSMUSG00000039128
Nudt5	1617.33664692583	-0.196149557530816	0.124949272037264	-1.56983353590341	0.116453843387035	0.999971315249418	ENSMUSG00000025817
Gm13199	20.927936431175	0.0546417068354009	0.31725305504136	0.172233823968306	0.863253707514621	0.999971315249418	ENSMUSG00000056718
Sec61a2	122.108206718952	0.128220019771002	0.162313121636078	0.789954739817545	0.429554201088499	0.999971315249418	ENSMUSG00000025816
Dhtkd1	7.09666293517663	-0.725999554144723	0.454565710629171	-1.59712784569663	0.110237212296106	0.999971315249418	ENSMUSG00000025815
Upf2	3141.47159370599	0.109679805523325	0.143810445516089	0.762669256254095	0.445660669974534	0.999971315249418	ENSMUSG00000043241
Usp6nl	886.623675149949	0.124057094534266	0.118469181327117	1.0471676527562	0.295022261389269	0.999971315249418	ENSMUSG00000039046
Celf2	3303.60026123616	0.0640908331547407	0.197776126192974	0.324057480487843	0.745894517003871	0.999971315249418	ENSMUSG00000002107
Gm13217	64.7308227085511	0.30366455811476	0.464478554729169	0.653775195911514	0.513256649057423	0.999971315249418	ENSMUSG00000082953
Taf3	2587.56167071158	0.263657684262931	0.312182981525044	0.844561362617969	0.398355789141245	0.999971315249418	ENSMUSG00000025782
Atp5c1	12314.5280608793	-0.0808543359609246	0.11987864060078	-0.674468241846236	0.50001366979855	0.999971315249418	ENSMUSG00000025781
Kin	1858.99431972116	0.0801856176529683	0.206697390541321	0.387937251858718	0.698062469731118	0.999971315249418	ENSMUSG00000037262
Itih5	22.3903248137135	-0.117245635902346	0.298673126788568	-0.392555022150836	0.694648165141211	0.999971315249418	ENSMUSG00000025780
Sfmbt2	46.1165072032101	0.458734780858639	0.237028289070177	1.93535878210225	0.0529462835972346	0.999971315249418	ENSMUSG00000061186
Gm13292	1550.7465180252	-0.16125283909786	0.136668679284491	-1.17988144717631	0.23804736977718	0.999971315249418	ENSMUSG00000082424
Pfkfb3	884.9479519554	0.105809849278956	0.217202542955182	0.487148298723136	0.626153240995006	0.999971315249418	ENSMUSG00000026773
Rbm17	16862.5064649089	0.0662363179376099	0.141511878868092	0.46806189323054	0.639740329191573	0.999971315249418	ENSMUSG00000037197
Il2ra	1977.87320745503	0.103743212312565	0.144531796146866	0.717788162039767	0.472887913607037	0.999971315249418	ENSMUSG00000026770
ENSMUSG00000104101	9.33374179034227	0.350533174701508	0.44612159732037	0.785734599730177	0.432022988435863	0.999971315249418	ENSMUSG00000104101
Il15ra	72.4813966954074	0.0485616081627891	0.146904500640361	0.330565829849376	0.740972460255354	0.999971315249418	ENSMUSG00000023206
Fbh1	641.252714688739	0.00239970481535283	0.13516774878298	0.0177535309787966	0.985835475817207	0.999971315249418	ENSMUSG00000058594
Ankrd16	536.415859951463	0.00960612031777634	0.15090737214807	0.0636557391533586	0.949244348268371	0.999971315249418	ENSMUSG00000047909
Gm13310	10.1948261993364	0.741184373845296	0.436181783736873	1.69925568072878	0.08927101920019	0.999971315249418	ENSMUSG00000080801
Mindy3	1042.27198163834	-0.179595873516327	0.0986910120382356	-1.81977942881715	0.0687926016584818	0.999971315249418	ENSMUSG00000026767
Rsu1	408.260812289618	-0.139504912674342	0.20474602066489	-0.68135591705917	0.495646309400166	0.999971315249418	ENSMUSG00000026727
Gm13270	6.53153956177952	0.302248803247338	0.550616552705025	0.548927927724791	0.583054911463533	0.999971315249418	ENSMUSG00000086358
Trdmt1	198.528592024111	-0.104159180885371	0.122704100699891	-0.848864710235911	0.395956577545736	0.999971315249418	ENSMUSG00000026723
Vim	10318.5854786976	0.0921965507904084	0.140869303807209	0.654482902226782	0.512800739054653	0.999971315249418	ENSMUSG00000026728
St8sia6	650.197695534607	-0.133736971471232	0.21396894861271	-0.625029810812874	0.53195149278922	0.999971315249418	ENSMUSG00000003418
Hacd1	55.0358197230891	-0.0674206316945138	0.282510571458624	-0.238648172868066	0.811378407620509	0.999971315249418	ENSMUSG00000063275
Stamos	12.4848040035556	0.214930740291637	0.485127582841157	0.443039620697078	0.657737076867395	0.999971315249418	ENSMUSG00000086657
Stam	278.027681682976	0.0271426242581344	0.174517465446763	0.155529557965156	0.876403853565306	0.999971315249418	ENSMUSG00000026718
ENSMUSG00000103901	6.98272276328841	-0.424836674410741	0.921147026837659	-0.461203979422509	0.644652266922785	0.999971315249418	ENSMUSG00000103901
Gm13320	15.9820999906528	0.327519567675798	0.614161858857382	0.533278911662037	0.593840523416761	0.999971315249418	ENSMUSG00000083545
Mrc1	16.9013692709514	0.246885742074287	0.304756734910558	0.810107583501787	0.417878346132872	0.999971315249418	ENSMUSG00000026712
ENSMUSG00000057914	11.1839381485131	-0.299805012173942	0.460320067938014	-0.651296854201702	0.514854878694032	0.999971315249418	ENSMUSG00000057914
Gm13316	47.7455585473539	0.000485362740804857	0.336229301266429	0.00144354682645655	0.998848216674394	0.999971315249418	ENSMUSG00000085281
Nsun6	160.413456747798	0.0990210223077647	0.100111530862767	0.989107063436113	0.322610762093396	0.999971315249418	ENSMUSG00000026707
Arl5b	157.759351539831	0.0354591471592553	0.231654976079127	0.153068791179963	0.878344026840296	0.999971315249418	ENSMUSG00000017418
Gm37416	204.853971815803	0.400059073983984	0.602218126767404	0.664309253079823	0.506492399987753	0.999971315249418	ENSMUSG00000103865
Nebl	80.7092159045346	0.327186964174578	0.237308425501128	1.37874145632905	0.167974482710644	0.999971315249418	ENSMUSG00000053702
A930004D18Rik	10.7090185890739	-0.0247547300246441	0.38885786346684	-0.0636600988442016	0.949240876779299	0.999971315249418	ENSMUSG00000054057
Skida1	20.337237177578	0.349239183569879	0.315759103939584	1.10603044920187	0.268713340256619	0.999971315249418	ENSMUSG00000054074
Mllt10	1058.27505945421	-0.044288130635693	0.122680543567635	-0.361003703992202	0.718096678145837	0.999971315249418	ENSMUSG00000026743
Dnajc1	979.651158052115	0.196334463562987	0.208251134993469	0.942777399840553	0.345794773925738	0.999971315249418	ENSMUSG00000026740
Commd3	1922.30688743505	-0.00241532167524054	0.150406678931019	-0.0160586065220433	0.987187636463335	0.999971315249418	ENSMUSG00000051154
Bmi1	2956.99751375955	-0.204188735935526	0.151379548633789	-1.34885285217418	0.177384234637454	0.999971315249418	ENSMUSG00000026739
Pip4k2a	1342.58855706591	-0.0890247276200282	0.150728666705557	-0.590629039358085	0.554769003191403	0.999971315249418	ENSMUSG00000026737
Armc3	9.31936397148315	0.901311584360404	0.58161210035402	1.54967818553257	0.121218776535732	0.999971315249418	ENSMUSG00000037683
Msrb2	96.0806101874126	0.114931138651431	0.27670348481929	0.415358479227287	0.677879497245757	0.999971315249418	ENSMUSG00000023094
Otud1	219.202924900717	-0.152349521499375	0.196685968219412	-0.774582563660173	0.438586363758222	0.999971315249418	ENSMUSG00000043415
Etl4	7.18740441470026	0.87478156086848	0.946474637119502	0.924252511964597	0.355354861058149	0.999971315249418	ENSMUSG00000036617
Gm13363	13.4742505422272	0.315745412291932	0.377481620272795	0.836452413401615	0.402900436891861	0.999971315249418	ENSMUSG00000060795
Gm13328	188.121347502934	0.280450489395072	0.230671393743317	1.21580090553902	0.224060773783451	0.999971315249418	ENSMUSG00000081128
Arhgap21	734.934712434534	-0.0366557439373689	0.34246093780715	-0.10703627739877	0.914760199858511	0.999971315249418	ENSMUSG00000036591
Gm13375	39.9136384525832	-0.141502260702195	0.273327738067722	-0.517701795297246	0.604666345464635	0.999971315249418	ENSMUSG00000075514
Thnsl1	66.4871689228885	0.101228568919922	0.183481965320862	0.551708549354698	0.581148051575413	0.999971315249418	ENSMUSG00000048550
Gm13378	38.5041453448016	0.782045507754963	0.603622188682975	1.29558774083717	0.195117554900365	0.999971315249418	ENSMUSG00000084071
Gm13341	1738.38936607282	0.217461720297595	0.242525656970948	0.896654494265093	0.36990330983741	0.999971315249418	ENSMUSG00000083863
Gm13340	4411.52457155061	0.404203424942641	0.352895728241347	1.14539052925629	0.25204741974829	0.999971315249418	ENSMUSG00000083563
Gm13339	102.441954230221	0.304361835830486	0.428940856260093	0.709565972531033	0.477973327007555	0.999971315249418	ENSMUSG00000082884
Apbb1ip	1864.73617237712	-0.0493603997593197	0.235256342501029	-0.209815383655825	0.833811765885039	0.999971315249418	ENSMUSG00000026786
Pdss1	560.817781869339	-0.215377593176215	0.108401786682526	-1.98684541802791	0.0469395297741655	0.999971315249418	ENSMUSG00000026784
Abi1	1652.61265022732	0.0324324700456914	0.116867721173341	0.277514353151345	0.781385186244859	0.999971315249418	ENSMUSG00000058835
Acbd5	633.774639441973	0.0336686552135774	0.147180454629971	0.228757651946547	0.819057282867315	0.999971315249418	ENSMUSG00000026781
Mastl	499.604912488201	0.0375668297617324	0.113264121512868	0.331674578498049	0.740134998479587	0.999971315249418	ENSMUSG00000026779
Yme1l1	6051.56741096897	-0.0924510706275087	0.0751567331558778	-1.23011028746768	0.218655808212289	0.999971315249418	ENSMUSG00000026775
Gm13423	21.2184228056413	0.486403624705592	0.608592737594039	0.79922679759292	0.424158916114333	0.999971315249418	ENSMUSG00000081648
Gm13422	16.6851638445084	0.0777907292293647	0.349468087336957	0.222597519052888	0.823848767518285	0.999971315249418	ENSMUSG00000084098
Gm38309	10.0718186324516	0.409813442190685	0.429389060480561	0.954410533263314	0.339875876523523	0.999971315249418	ENSMUSG00000102704
Spopl	517.272020056298	0.0283701281023796	0.0993670786723621	0.285508324099202	0.775254727980048	0.999971315249418	ENSMUSG00000026771
Gm13392	14.1962021431559	-0.0548202108394157	0.434016849984462	-0.126308945934653	0.899487375144349	0.999971315249418	ENSMUSG00000083373
Il1rn	18.2916861900243	0.333257748167761	0.35087731046075	0.94978426427787	0.342221883078075	0.999971315249418	ENSMUSG00000026981
Psd4	1581.60965517845	0.0589390428545817	0.174415843648831	0.337922528260963	0.735421570088373	0.999971315249418	ENSMUSG00000026979
ENSMUSG00000004113	42.7840376903271	0.557670419578771	0.291779470266032	1.91127367210007	0.0559694206051774	0.999971315249418	ENSMUSG00000004113
Ehmt1	1201.39774968869	-0.0099217346865519	0.106857098664132	-0.0928504966968772	0.926022333686085	0.999971315249418	ENSMUSG00000036893
Arrdc1	364.068066510976	0.0594783768044859	0.123504460211731	0.481588897295841	0.63009801488804	0.999971315249418	ENSMUSG00000026972
Zmynd19	2392.87829265108	-0.0715122968308604	0.103631811391174	-0.690061245392368	0.490155673182025	0.999971315249418	ENSMUSG00000026974
Dph7	287.201959608021	-0.0983829313294913	0.0954332577570463	-1.03090823515586	0.302583854410911	0.999971315249418	ENSMUSG00000026975
Mrpl41	1252.05139660913	-0.153083483574686	0.234034579940203	-0.654106259057101	0.51304334928969	0.999971315249418	ENSMUSG00000036850
Pnpla7	241.59211839779	-0.124942530911998	0.111783281985712	-1.11772108219158	0.263686135799937	0.999971315249418	ENSMUSG00000036833
Gm13370	5828.15833183607	0.11639570578185	0.351476568043942	0.331162064172933	0.740522073392541	0.999971315249418	ENSMUSG00000084383
Nsmf	135.978193632192	0.0633485796983581	0.206076827054585	0.307402732290606	0.758536848742914	0.999971315249418	ENSMUSG00000006476
Tor4a	416.649294218305	0.139697721285646	0.100166224688098	1.39465894537448	0.163118710655846	0.999971315249418	ENSMUSG00000059555
Nelfb	1469.92418848765	-0.0523300761058107	0.13317284000063	-0.392948562976978	0.694357472506629	0.999971315249418	ENSMUSG00000013465
Tubb4b	19513.4587283907	0.031963853846797	0.234320840162628	0.136410631784236	0.891496669294395	0.999971315249418	ENSMUSG00000036752
Ndor1	89.8528962105034	-0.0166342568340786	0.339507131331352	-0.0489953090789246	0.960923034264533	0.999971315249418	ENSMUSG00000006471
Tmem203	51.5225982023687	-0.0692151849856903	0.262526015630108	-0.263650765504371	0.792049036854793	0.999971315249418	ENSMUSG00000078201
Tprn	282.049664511664	-0.144261599634626	0.129184076397068	-1.1167134809341	0.264116851921841	0.999971315249418	ENSMUSG00000048707
Ssna1	720.681852068194	-0.0087863158833386	0.235154317146342	-0.037364042429511	0.970194742623505	0.999971315249418	ENSMUSG00000026966
Anapc2	2465.98826607406	-0.0577748484303676	0.0698122911206614	-0.8275741635597	0.407911705148986	0.999971315249418	ENSMUSG00000026965
Man1b1	968.750435886917	-0.0450869142175863	0.177762710200589	-0.253635389372213	0.799777253667593	0.999971315249418	ENSMUSG00000036646
Dpp7	137.614966706082	0.129310626491578	0.168932736073325	0.765456296377338	0.443999881134157	0.999971315249418	ENSMUSG00000026958
Uap1l1	300.658977093177	0.024533329092604	0.175058234001007	0.140143816899597	0.888546361299413	0.999971315249418	ENSMUSG00000026956
Sapcd2	503.707248326596	-0.00486821023505562	0.124963050309852	-0.0389571975314676	0.968924514110002	0.999971315249418	ENSMUSG00000026955
Abca2	231.989649029806	0.133744849295378	0.267812074786671	0.499398129833817	0.617498936433659	0.999971315249418	ENSMUSG00000026944
Paxx	216.576142173408	0.112363718185693	0.234365766149108	0.479437419687844	0.631627478229862	0.999971315249418	ENSMUSG00000047617
Clic3	9.67030851450435	0.387142234690997	0.534230265422935	0.724672972963273	0.468652679508635	0.999971315249418	ENSMUSG00000015093
C8g	11.2754143908842	0.63338371588695	0.42547242539676	1.48865984745383	0.136576963380684	0.999971315249418	ENSMUSG00000015083
Fbxw5	395.717542203857	-0.0602448464250633	0.208147064178063	-0.289434043487281	0.772249246337408	0.999971315249418	ENSMUSG00000015095
Traf2	937.162861487367	0.0722692680250669	0.165316195785028	0.437157821602932	0.661996896102875	0.999971315249418	ENSMUSG00000026942
Edf1	5259.5585201086	0.115614051804762	0.319328680681259	0.362053454008923	0.717312085636815	0.999971315249418	ENSMUSG00000015092
Mamdc4	58.3456288339399	-0.110888312370491	0.20175467120842	-0.549619553819099	0.582580344232712	0.999971315249418	ENSMUSG00000026941
Phpt1	22.9186550641285	0.297495348028389	0.31664308943001	0.939528945867447	0.34745923789684	0.999971315249418	ENSMUSG00000036504
Rabl6	3713.95526337364	0.238124172571266	0.216747322786349	1.09862566932828	0.271931376413283	0.999971315249418	ENSMUSG00000015087
Bmyc	87.3923577619626	0.0284398321291816	0.297311819893707	0.0956565808226166	0.923793326185738	0.999971315249418	ENSMUSG00000049086
Camsap1	636.101283150747	0.0496435976129036	0.207742927834485	0.238966486755477	0.81113156964883	0.999971315249418	ENSMUSG00000026933
Ubac1	1192.26693962525	-0.0863590349651454	0.0621386043400179	-1.38978073103469	0.16459547106766	0.999971315249418	ENSMUSG00000036352
Nacc2	8.01293991672398	0.0225704508594085	0.412309533495975	0.054741520692072	0.95634439020775	0.999971315249418	ENSMUSG00000026932
Tmem250-ps	369.307581864208	0.0450174289961819	0.12581030511465	0.357819885701396	0.720478107930819	0.999971315249418	ENSMUSG00000087679
1810012K08Rik	11.9308158837924	0.168703692646824	0.524697630678724	0.321525546872771	0.747812155564984	0.999971315249418	ENSMUSG00000087595
Qsox2	183.714031740911	0.051218929528705	0.13560424796053	0.377708886698102	0.705646865396991	0.999971315249418	ENSMUSG00000036327
Gpsm1	165.019188302742	-0.129534232505036	0.106323881312221	-1.21829856948748	0.223110533489089	0.999971315249418	ENSMUSG00000026930
Dnlz	672.433369906032	-0.00658826266345314	0.189174445843685	-0.0348263880677469	0.972218178755788	0.999971315249418	ENSMUSG00000075467
Gm13562	9.07595595661546	0.480004155093622	0.549729957914376	0.873163538175567	0.382573945649417	0.999971315249418	ENSMUSG00000086779
Snapc4	669.490095950984	0.0190290235718416	0.289554206278214	0.0657183461999436	0.947602065832707	0.999971315249418	ENSMUSG00000036281
Gm13563	15.6820693324425	-0.0539843089371763	0.439956717786719	-0.122703681418377	0.90234174854881	0.999971315249418	ENSMUSG00000085767
Entr1	737.750531531366	-0.044902944338099	0.0867594849632576	-0.517556603259174	0.604767666690035	0.999971315249418	ENSMUSG00000026927
Pmpca	2112.17371113367	-0.0856865707128101	0.167842638060888	-0.510517301817706	0.609689096362595	0.999971315249418	ENSMUSG00000026926
Inpp5e	142.434337851604	-0.0533970698230007	0.231032536050921	-0.231123592961087	0.817218786738175	0.999971315249418	ENSMUSG00000026925
Sec16a	1377.42550557409	0.158912222617956	0.197464775579076	0.804762379274667	0.420956815027282	0.999971315249418	ENSMUSG00000026924
Notch1	372.005941553531	0.254897776215239	0.380169610085728	0.670484356068756	0.502549075762466	0.999971315249418	ENSMUSG00000026923
Egfl7	77.8239600927884	0.123018844903557	0.271485409289074	0.453132436198691	0.650453379998441	0.999971315249418	ENSMUSG00000026921
Agpat2	70.2010219183639	-0.0508975420430532	0.166334340674963	-0.305995393594117	0.75960815305203	0.999971315249418	ENSMUSG00000026922
Snora17	40.7246217892558	-0.000555662751152527	0.284345550458165	-0.00195418127787542	0.998440789921765	0.999971315249418	ENSMUSG00000077192
Surf6	3035.90258939345	-0.052848193260655	0.165452991932202	-0.31941515619319	0.749411719328524	0.999971315249418	ENSMUSG00000036160
Med22	471.665544397465	-0.00766752306518158	0.112818434317102	-0.0679633883557565	0.945814778728094	0.999971315249418	ENSMUSG00000015776
Rpl7a	42537.7424746836	-0.107202734413264	0.193188554725404	-0.554912451028169	0.578954545007599	0.999971315249418	ENSMUSG00000062647
Gm23969	10.1681473995367	0.394269603128448	0.473834437516415	0.832083048237264	0.405362069543733	0.999971315249418	ENSMUSG00000065258
Surf1	829.44603165209	-0.161205507241602	0.195420902300955	-0.824914353293384	0.409420216883209	0.999971315249418	ENSMUSG00000015790
Surf2	1802.44062202456	-0.0993355120363025	0.129432757903551	-0.767468094207838	0.442803256013985	0.999971315249418	ENSMUSG00000014873
Surf4	3651.11521412691	0.0726488089130433	0.0984687317791199	0.737785565025916	0.460644766438311	0.999971315249418	ENSMUSG00000014867
Stkld1	7.60786617295376	-0.285043917410833	0.428215392391813	-0.665655467961367	0.505631343613738	0.999971315249418	ENSMUSG00000049897
Rexo4	2798.70881969128	0.0481216047417751	0.151181208236444	0.31830414178536	0.750254242884268	0.999971315249418	ENSMUSG00000052406
Cacfd1	210.352074060659	0.0638772526063516	0.176137687594668	0.362655224322846	0.71686245153953	0.999971315249418	ENSMUSG00000015488
Slc2a6	1087.19386382627	0.153372518680098	0.137743429585136	1.11346522401856	0.265508675955264	0.999971315249418	ENSMUSG00000036067
Vav2	2175.22059136299	0.0212430725591276	0.194294803949605	0.109334228848639	0.912937398624326	0.999971315249418	ENSMUSG00000009621
ENSMUSG00000109946	20.1477985771773	0.209350008521732	0.300668243421835	0.69628240794295	0.486251988046799	0.999971315249418	ENSMUSG00000109946
Brd3	2708.11926002687	0.128085107502609	0.2526000454643	0.507066842633296	0.612107919009982	0.999971315249418	ENSMUSG00000026918
Wdr5	2397.69635189882	-0.0129048126180108	0.125659398265391	-0.102696756439626	0.918203648020781	0.999971315249418	ENSMUSG00000026917
Gm13421	9.14464345253007	-0.0614268439567001	0.444466635291436	-0.138203498484026	0.89007959024167	0.999971315249418	ENSMUSG00000085929
Rxra	252.305183267996	-0.179666814898188	0.169840203365744	-1.05785798260782	0.290120193542987	0.999971315249418	ENSMUSG00000015846
Ppp1r26	19.507337768132	0.350285166595634	0.321288965848319	1.09024960029597	0.275603209707397	0.999971315249418	ENSMUSG00000035829
Mrps2	1385.27320401338	-0.0829038418862941	0.0826151193631996	-1.00349479036428	0.315622189267814	0.999971315249418	ENSMUSG00000035772
Rpsa-ps9	618.623828187365	0.823979888888185	0.405726006274654	2.03087767642481	0.0422674048447221	0.999971315249418	ENSMUSG00000082895
Ralgds	335.246205103575	0.128577845352912	0.1981446507659	0.648908990759594	0.516397203070858	0.999971315249418	ENSMUSG00000026821
Gtf3c5	928.612052665822	0.0328025487796134	0.0968241459338519	0.338784798597897	0.734771853755563	0.999971315249418	ENSMUSG00000026816
Gfi1b	11.5911823283119	-0.13813768394676	0.440604398086911	-0.313518622479823	0.753886674659462	0.999971315249418	ENSMUSG00000026815
Tsc1	564.54266240036	0.0812693773998302	0.170520350273474	0.476596355036178	0.633649579442102	0.999971315249418	ENSMUSG00000026812
Gtf3c4	720.343005975951	-0.0103357169230026	0.175935263758257	-0.0587472727309763	0.953153406136392	0.999971315249418	ENSMUSG00000035666
Ddx31	982.434511938037	-0.0906135666005643	0.15994609991045	-0.566525639895545	0.571036508223373	0.999971315249418	ENSMUSG00000026806
Gm13394	14189.5210228067	0.0969339211934821	0.152068493911017	0.637435925749372	0.523840933620904	0.999971315249418	ENSMUSG00000083773
Ttf1	690.311475382266	0.108281742872855	0.192877889736139	0.5614004955207	0.574524546310463	0.999971315249418	ENSMUSG00000026803
Setx	1854.91152371729	0.0319089124908478	0.19965340857662	0.159821526305684	0.873021666506867	0.999971315249418	ENSMUSG00000043535
Ntng2	56.2344252377599	0.130374062614487	0.194964303151684	0.668707350560759	0.50368217766693	0.999971315249418	ENSMUSG00000035513
6530402F18Rik	232.949996495522	0.142444969945039	0.204645640222888	0.69605670460361	0.486393318968066	0.999971315249418	ENSMUSG00000079499
Med27	388.708166532203	0.000483332159494303	0.105137610623923	0.00459713851804358	0.996332027072215	0.999971315249418	ENSMUSG00000026799
Rapgef1	3485.84854929805	0.0276046726356612	0.161371960359678	0.171062386390633	0.864174711191285	0.999971315249418	ENSMUSG00000039844
Trub2	1232.71033999067	0.109463688545712	0.312837503691227	0.349905900840306	0.726409318414244	0.999971315249418	ENSMUSG00000039826
Coq4	191.507371952713	-0.0538093480652417	0.181166755655791	-0.297015574797163	0.766454618444547	0.999971315249418	ENSMUSG00000026798
Slc27a4	84.0939038409153	-0.140280504876993	0.200983916019431	-0.697968810914356	0.48519669935593	0.999971315249418	ENSMUSG00000059316
Urm1	621.282432261177	-0.0110269408500705	0.156689051256072	-0.0703746736716759	0.943895448740642	0.999971315249418	ENSMUSG00000069020
Cercam	38.2808970177047	0.387973802306797	0.26072734495349	1.48804415730159	0.136739248804835	0.999971315249418	ENSMUSG00000039787
Odf2	3395.37107460094	0.137412954538482	0.218165237373615	0.62985724120272	0.528787990652069	0.999971315249418	ENSMUSG00000026790
Gle1	1496.40389973192	0.0324177753949813	0.0800250035429758	0.405095582127303	0.685407253756158	0.999971315249418	ENSMUSG00000019715
Sptan1	3681.16936842849	0.0429693499972102	0.316062760301092	0.135951954467132	0.891859262991779	0.999971315249418	ENSMUSG00000057738
Wdr34	203.040167813149	-0.12539837287546	0.20124331941886	-0.623118189650116	0.533206857371089	0.999971315249418	ENSMUSG00000039715
Set	67496.8733311569	-0.143530420791329	0.135814506143549	-1.05681215406861	0.290597326238615	0.999971315249418	ENSMUSG00000054766
Pkn3	31.4620427312549	-0.105302352884828	0.224091033190478	-0.469908819579231	0.638420162871833	0.999971315249418	ENSMUSG00000026785
Zdhhc12	385.859953542152	0.00981926652594044	0.234858724952508	0.0418092473589221	0.966650763133967	0.999971315249418	ENSMUSG00000015335
Zer1	166.933852832317	0.11452022976663	0.208895234180733	0.548218489597274	0.583541887851436	0.999971315249418	ENSMUSG00000039686
Tbc1d13	459.338151005132	-0.0530056697037449	0.0995449559800581	-0.53247971413402	0.594393788134827	0.999971315249418	ENSMUSG00000039678
Slc39a1-ps	29.2536855732468	-0.248994714760143	0.415875875891988	-0.598723631723261	0.549357195693448	0.999971315249418	ENSMUSG00000085401
Endog	175.728920005888	-0.338917324749998	0.235908267553674	-1.43664877990292	0.150817815643874	0.999971315249418	ENSMUSG00000015337
Spout1	948.498025894853	-0.0466974013075606	0.100689497508713	-0.463776287129844	0.642808034231444	0.999971315249418	ENSMUSG00000039660
Kyat1	34.0904673672907	0.317938392131904	0.227912726438013	1.3950006087895	0.163015655979645	0.999971315249418	ENSMUSG00000039648
Lrrc8a	67.1369182269498	-0.166749997275849	0.327989943093479	-0.50839972623284	0.611173044746631	0.999971315249418	ENSMUSG00000007476
Dolk	159.838744857582	-0.0439772194665056	0.216368736205897	-0.20325126558329	0.838938644836399	0.999971315249418	ENSMUSG00000075419
Nup188	828.971245362859	0.0150478694317535	0.27631051089561	0.0544599964112064	0.956568679504471	0.999971315249418	ENSMUSG00000052533
Sh3glb2	467.70667808452	-0.133713235985437	0.0924282366604784	-1.44667085315728	0.147989131510438	0.999971315249418	ENSMUSG00000026860
Miga2	182.150159726273	0.00400986153925899	0.174391291577708	0.0229934734870188	0.981655478977222	0.999971315249418	ENSMUSG00000026858
Dolpp1	282.341399043295	-0.00635273078948815	0.0835305842617641	-0.0760527517631179	0.939377129846323	0.999971315249418	ENSMUSG00000026856
Crat	215.572991122637	0.0552053883501346	0.145237099760597	0.380105279168566	0.703867267171368	0.999971315249418	ENSMUSG00000026853
Ptpa	3185.14734674681	-0.0856851900942642	0.0547937441091084	-1.5637768779524	0.117869976146512	0.999971315249418	ENSMUSG00000039515
Ier5l	40.262513445802	0.566526603297514	0.318259053109583	1.7800800880987	0.0750628547692397	0.999971315249418	ENSMUSG00000089762
Ntmt1	509.671033410423	0.0172268994677408	0.158744749022641	0.10851949166069	0.913583619709307	0.999971315249418	ENSMUSG00000026857
Asb6	346.812015916682	-0.0096212455282358	0.0950796459017463	-0.101191432056638	0.919398498035234	0.999971315249418	ENSMUSG00000039483
Tor1b	1094.85252346827	0.0404301118093491	0.0849277659810156	0.476052929714255	0.634036669878043	0.999971315249418	ENSMUSG00000026848
Tor1a	907.308391376809	0.0441226318993676	0.0719863381812329	0.612930633980636	0.539922206566394	0.999971315249418	ENSMUSG00000026849
BC005624	3016.23414636377	-0.000363249731143882	0.111655095073482	-0.0032533197961528	0.997404230942272	0.999971315249418	ENSMUSG00000026851
Usp20	151.405128090145	0.166546255193831	0.125172545029644	1.33053342611504	0.183342580705975	0.999971315249418	ENSMUSG00000026854
Fnbp1	3064.69386985541	0.100617754337619	0.185228824037957	0.543207866595325	0.586986690909865	0.999971315249418	ENSMUSG00000075415
D330023K18Rik	8.0028950190145	0.345511982165133	0.485224983082723	0.712065524676888	0.476424201507038	0.999971315249418	ENSMUSG00000087269
Ncs1	47.319450117197	0.475265029777418	0.282124937952003	1.68459063997481	0.0920675784689878	0.999971315249418	ENSMUSG00000062661
Ass1	884.170227540209	0.0234779628936694	0.0953258736682074	0.2462916099294	0.805456504257457	0.999971315249418	ENSMUSG00000076441
Fubp3	689.549387907711	-0.0081085020560281	0.223848071724565	-0.0362232383489336	0.971104356623609	0.999971315249418	ENSMUSG00000026843
Exosc2	2790.79222611718	-0.212907705725785	0.101950937982734	-2.08833493775057	0.0367676319732942	0.999971315249418	ENSMUSG00000039356
Abl1	523.514556493564	-0.026822296226493	0.290586547956909	-0.0923039845274275	0.926456522692358	0.999971315249418	ENSMUSG00000026842
Nup214	1108.32589663965	0.0514121941278102	0.2859221596656	0.179811855744022	0.857300275786122	0.999971315249418	ENSMUSG00000001855
Fam78a	323.157794137473	0.0173822323642973	0.16987841706541	0.102321605443288	0.918501406646442	0.999971315249418	ENSMUSG00000050592
Prrc2b	1417.67693806558	0.133558755817442	0.295518794633718	0.451946739912032	0.65130735167369	0.999971315249418	ENSMUSG00000039262
Pomt1	176.915526066139	-0.00267614406703482	0.198993135321434	-0.0134484240509706	0.989270033520728	0.999971315249418	ENSMUSG00000039254
Uck1	396.831525370357	-0.11490412990094	0.124042739102269	-0.926326931608673	0.354276103993945	0.999971315249418	ENSMUSG00000002550
Gm13611	181.023249363199	0.25161596977703	0.32987357189279	0.762764862711725	0.445603639808473	0.999971315249418	ENSMUSG00000066068
Swi5	4148.89209108706	0.193814177520668	0.198729910649632	0.975264251300195	0.32942919830566	0.999971315249418	ENSMUSG00000044627
Golga2	1938.74662798491	0.203329168034423	0.17245898503889	1.17900014306921	0.238398118864106	0.999971315249418	ENSMUSG00000002546
Ciz1	1050.40768728077	0.197633094236488	0.219728450268556	0.899442443593161	0.368417040208212	0.999971315249418	ENSMUSG00000039205
1110008P14Rik	95.923771303656	0.0239766083786322	0.225271380575625	0.106434329639948	0.915237756647227	0.999971315249418	ENSMUSG00000039195
Ptges2	234.253537357203	-0.0239901816366413	0.121273472232779	-0.197818873286593	0.843186779217314	0.999971315249418	ENSMUSG00000026820
Slc25a25	383.70753747382	0.00527236650872941	0.116431692039072	0.0452829158143655	0.963881804674085	0.999971315249418	ENSMUSG00000026819
Naif1	141.068933791331	0.0647013176263845	0.166361241191284	0.388920623355956	0.697334865643904	0.999971315249418	ENSMUSG00000039164
ENSMUSG00000103175	41.556963250687	0.212932977750755	0.27983690797732	0.760918133672392	0.446705966743384	0.999971315249418	ENSMUSG00000103175
Fam102a	470.469615257847	0.151061908048969	0.188878458017389	0.7997836790634	0.423836140707313	0.999971315249418	ENSMUSG00000039157
Dpm2	251.11865582583	-0.0380248020036859	0.124144690216823	-0.306294227624831	0.759380633845416	0.999971315249418	ENSMUSG00000026810
St6galnac4	1771.1878332639	-0.115124311532391	0.120893612568441	-0.952277867180259	0.34095607945958	0.999971315249418	ENSMUSG00000079442
St6galnac6	112.87888353798	0.164558383793652	0.1474285082323	1.11619106621062	0.264340357768316	0.999971315249418	ENSMUSG00000026811
Fpgs	659.655192100117	-0.113854722967706	0.138196008201484	-0.823864049688831	0.410016809444447	0.999971315249418	ENSMUSG00000009566
Cdk9	2600.1734616963	-0.0246420273052157	0.114222468881632	-0.215737127261294	0.829192659245096	0.999971315249418	ENSMUSG00000009555
Sh2d3c	222.019455121904	-0.0786850109601384	0.222254908572431	-0.354030475482145	0.723316044278083	0.999971315249418	ENSMUSG00000059013
Tor2a	363.26043111637	0.109568399802447	0.175016370758052	0.626046576830904	0.531284391492199	0.999971315249418	ENSMUSG00000009563
Ptrh1	69.7638989816953	-0.0946258716918317	0.164233770217901	-0.576165739642246	0.56450316006734	0.999971315249418	ENSMUSG00000053746
Cfap157	10.4045351520404	-0.0274387408316659	0.389333778228613	-0.0704761373557322	0.943814692945987	0.999971315249418	ENSMUSG00000038987
Stxbp1	129.257054002916	0.119007267113107	0.196315356724241	0.606204573594686	0.544378916105507	0.999971315249418	ENSMUSG00000026797
Fam129b	62.8414970508771	0.24326995512223	0.218518256499206	1.11327062104357	0.265592220172516	0.999971315249418	ENSMUSG00000026796
Lrsam1	90.8743197174597	0.0315243974160263	0.224896278769884	0.14017305038774	0.888523264331253	0.999971315249418	ENSMUSG00000026792
Rpl12	52759.5941457357	0.0165919048181557	0.263270557704015	0.063022257265886	0.949748780813517	0.999971315249418	ENSMUSG00000038900
Slc2a8	27.4984318947573	0.176447550582072	0.26098058325992	0.676094552238553	0.498980615253921	0.999971315249418	ENSMUSG00000026791
Garnl3	6.37653971168598	-0.317755263351582	0.77593875910677	-0.409510750200659	0.68216487923811	0.999971315249418	ENSMUSG00000038860
Ralgps1	37.311119905206	0.0444986418543017	0.250266876816651	0.177804759544356	0.858876309337517	0.999971315249418	ENSMUSG00000038831
Zbtb34	72.9890859359253	0.0573582824229403	0.228453485828927	0.251072038646379	0.801758413550138	0.999971315249418	ENSMUSG00000068966
Zbtb43	364.76455503795	0.0232173999865178	0.264083404990901	0.0879169215018176	0.929942707268734	0.999971315249418	ENSMUSG00000026788
Mvb12b	28.2780457066601	0.297687979663448	0.270557962508193	1.10027432533771	0.271212615182145	0.999971315249418	ENSMUSG00000038740
Pbx3	122.374098790515	0.0695882196788332	0.183788625871714	0.378631807865012	0.704961298534599	0.999971315249418	ENSMUSG00000038718
Mapkap1	1100.95797290196	-0.0123010344894187	0.135092726681895	-0.0910562307205781	0.927447910930154	0.999971315249418	ENSMUSG00000038696
Gm13408	1796.89242493259	0.370637549962916	0.23794774738314	1.55764260867795	0.11931799224335	0.999971315249418	ENSMUSG00000081992
Gm13414	500.852684778575	0.183723685445487	0.116499714349899	1.57703120965332	0.114788344016938	0.999971315249418	ENSMUSG00000087635
Gapvd1	1756.46839155848	-0.044589328203178	0.121816349695604	-0.366037303815115	0.714337239870165	0.999971315249418	ENSMUSG00000026867
Hspa5	78804.1301746912	-0.0131568269298249	0.150891190001068	-0.0871941359182853	0.930517200464612	0.999971315249418	ENSMUSG00000026864
Rabepk	539.274537939456	0.0947232483996945	0.0851346255943561	1.1126289419657	0.265867825079408	0.999971315249418	ENSMUSG00000070953
Fbxw2	1185.2469117419	0.00637585542162624	0.0790317135368871	0.0806746448519098	0.935700701551617	0.999971315249418	ENSMUSG00000035949
Psmd5	1479.19489041754	-0.225647922503716	0.117514930910648	-1.92016385284085	0.0548372058989808	0.999971315249418	ENSMUSG00000026869
Phf19	522.080638206334	-0.11460547370664	0.198795860770025	-0.576498289565596	0.564278425648799	0.999971315249418	ENSMUSG00000026873
Traf1	6163.53417526603	0.229897940066749	0.185308810201515	1.240620668908	0.214745912842575	0.999971315249418	ENSMUSG00000026875
AI182371	16.9875272226189	0.303653636120015	0.29270343763472	1.03741055647922	0.299544560623671	0.999971315249418	ENSMUSG00000035875
Cntrl	4085.3752471681	0.097622557084333	0.248938740178167	0.392154941470596	0.694943734537592	0.999971315249418	ENSMUSG00000057110
Rab14	3042.53414195084	-0.0672572048215716	0.0721533741903204	-0.932142198148154	0.351263042594358	0.999971315249418	ENSMUSG00000026878
Stom	86.3973822734781	0.0500663918700251	0.221479140951829	0.226054659842275	0.821158908014387	0.999971315249418	ENSMUSG00000026880
Glo1-ps	41.510224735763	0.21322747939273	0.226899422267823	0.939744479124519	0.347348643956989	0.999971315249418	ENSMUSG00000075391
Ggta1	1139.2951792828	0.085620951775451	0.162510753694211	0.526863298760892	0.598288522101793	0.999971315249418	ENSMUSG00000035778
Ttll11	20.1146648035232	0.190726405608143	0.305810128530932	0.623675894988714	0.532840456701924	0.999971315249418	ENSMUSG00000026885
Ndufa8	2008.55877014472	0.130391419319291	0.256807879597747	0.507739168765111	0.61163627557475	0.999971315249418	ENSMUSG00000026895
Rbm18	394.779248926586	-0.082539780857974	0.0836326473602242	-0.986932537271683	0.323675712109782	0.999971315249418	ENSMUSG00000026889
Mrrf	775.241400137493	-0.093128756417917	0.0919312605484214	-1.01302599205484	0.311047745972856	0.999971315249418	ENSMUSG00000026887
Ptgs1	14.8461278989163	0.100170760501889	0.350657762990085	0.285665315513695	0.775134472335297	0.999971315249418	ENSMUSG00000047250
Gm13430	18.2751466188042	0.391936231960484	0.312359978904873	1.25475815863032	0.209566565972475	0.999971315249418	ENSMUSG00000083101
Gm13436	1351.13901026871	0.174612762340013	0.370756296959451	0.470963713285523	0.637666647996616	0.999971315249418	ENSMUSG00000083716
Pdcl	1241.90176973407	0.0208426899146841	0.216052593778342	0.0964704452290332	0.923146945713975	0.999971315249418	ENSMUSG00000009030
Rc3h2	543.102737989683	0.0609469927128983	0.0952792444468591	0.639667044661451	0.52238908487888	0.999971315249418	ENSMUSG00000075376
Zbtb6	942.450586274293	-0.0389968475555709	0.156548770586777	-0.24910350563216	0.803280717816448	0.999971315249418	ENSMUSG00000066798
Zbtb26	206.489858269171	-0.0913779608235975	0.193604163952211	-0.471983447867129	0.636938603183068	0.999971315249418	ENSMUSG00000050714
Rabgap1	939.978910246767	0.102760450249808	0.27760750779051	0.370164521369335	0.711259909811131	0.999971315249418	ENSMUSG00000035437
Strbp	3469.08249141515	-0.0726997453077977	0.153302740771785	-0.474223389234915	0.635340616117461	0.999971315249418	ENSMUSG00000026915
Dennd1a	232.754384109713	0.14907095878515	0.263753994996974	0.565189387128944	0.571944954513443	0.999971315249418	ENSMUSG00000035392
Nek6	473.906190122173	-0.124021577628992	0.0900090791634143	-1.3778785293851	0.168240794960234	0.999971315249418	ENSMUSG00000026749
Psmb7	4417.29191037863	-0.00373162109612263	0.201920458641462	-0.0184806488714877	0.985255414893727	0.999971315249418	ENSMUSG00000026750
Gm13586	22.1055017711227	0.678066652581334	0.450766690792834	1.50425190332656	0.132516518054887	0.999971315249418	ENSMUSG00000082931
Nr6a1	88.490754419362	0.0346576023750575	0.223622683806527	0.154982499025199	0.876835114345638	0.999971315249418	ENSMUSG00000063972
Olfml2a	12.5860846492401	0.153601018412126	0.394148969634955	0.389702955596675	0.696756210726929	0.999971315249418	ENSMUSG00000046618
Gm13496	10.3605956831391	0.397727040417478	0.43691950280439	0.910298207941386	0.362665263386393	0.999971315249418	ENSMUSG00000085755
Rpl35	29124.6012016053	0.00318239275574555	0.266992088166417	0.0119194271920221	0.990489898258114	0.999971315249418	ENSMUSG00000062997
Arpc5l	6416.11689782499	0.0564274511141098	0.224305877353601	0.251564746228901	0.801377510824266	0.999971315249418	ENSMUSG00000026755
Golga1	478.697722133266	-0.0258561188003869	0.242176990008336	-0.106765381795756	0.914975111778255	0.999971315249418	ENSMUSG00000026754
Scai	204.086249238567	0.0324911415405602	0.208196291205861	0.156060136097398	0.875985620083156	0.999971315249418	ENSMUSG00000035236
Gm16523	8.26287971228551	-0.375276961485984	1.33435061570592	-0.281243143345386	0.778523915887686	0.999971315249418	ENSMUSG00000082315
Ppp6c	1629.94847510978	-0.137990311995971	0.102464862722665	-1.3467086016546	0.178074100876289	0.999971315249418	ENSMUSG00000026753
Gm13453	62.3490265766567	0.277279188819523	0.294253748810242	0.942313190369357	0.346032316941622	0.999971315249418	ENSMUSG00000083240
Gm13456	14814.933405787	0.138000817856154	0.236661896089685	0.583113801318729	0.559816693482254	0.999971315249418	ENSMUSG00000082536
Gm13461	2715.63288199152	0.0774699066965259	0.237527944697414	0.32615070532107	0.744310335286014	0.999971315249418	ENSMUSG00000081999
Gm13464	256.009338072318	0.112553717332887	0.180296123627657	0.624271421194448	0.532449349197554	0.999971315249418	ENSMUSG00000080994
Kynu	1170.85706671191	-0.220857537236204	0.140027885500849	-1.57723967941275	0.114740386069262	0.999971315249418	ENSMUSG00000026866
Arhgap15	812.089090270833	-0.00810801076492549	0.121324804537825	-0.0668289621055825	0.946717866516596	0.999971315249418	ENSMUSG00000049744
Gtdc1	249.381337886182	-0.171995039197476	0.0947331316391926	-1.81557430036778	0.0694356988535915	0.999971315249418	ENSMUSG00000036890
Zeb2	1687.00937674598	0.146919205544546	0.123645061487679	1.18823351112318	0.234741424501033	0.999971315249418	ENSMUSG00000026872
Zeb2os	78.3805565618874	0.599159339038586	0.384111040904356	1.55985971563827	0.118793036058654	0.999971315249418	ENSMUSG00000052248
Acvr2a	71.8190954768684	-0.0536990941819623	0.188262116002493	-0.285235794233032	0.775463499040526	0.999971315249418	ENSMUSG00000052155
Orc4	1547.49999144092	-0.155355262945733	0.0823093726065804	-1.88745531676319	0.0590991109164101	0.999971315249418	ENSMUSG00000026761
Mbd5	162.002898207276	-0.181876475109287	0.222553949157568	-0.817224209220926	0.41380030998601	0.999971315249418	ENSMUSG00000036792
Ap2m1-ps	1851.74324862936	-0.0374808535194434	0.0521138190431846	-0.719211414699516	0.472010667330312	0.999971315249418	ENSMUSG00000081272
Epc2	1093.96376739866	0.0196095398601509	0.192673420926657	0.101776050717527	0.918934435679142	0.999971315249418	ENSMUSG00000069495
Kif5c	35.8553951343136	0.416131275840128	0.202304654033038	2.05695354775264	0.0396906943861959	0.999971315249418	ENSMUSG00000026764
Mmadhc	1796.50497571018	-0.0250714568685223	0.118008433624045	-0.212454789022925	0.831752245753652	0.999971315249418	ENSMUSG00000026766
Gm13487	107.850003707743	0.47019836656961	0.250073577370195	1.8802400937927	0.0600753636120358	0.999971315249418	ENSMUSG00000083449
Gm13498	8.13563364934446	0.462072379838524	0.468354876234873	0.986586033977368	0.323845619585657	0.999971315249418	ENSMUSG00000083270
Rnd3	14.641910112313	-0.24810672771806	0.389809715515032	-0.636481641793488	0.524462542854517	0.999971315249418	ENSMUSG00000017144
Gm13493	2370.39185436674	0.327386255132724	0.180718371292839	1.81158259003021	0.0700507170485716	0.999971315249418	ENSMUSG00000087701
Rbm43	527.737046973559	-0.0691595538694087	0.0886635937532109	-0.780022001611052	0.435377924912997	0.999971315249418	ENSMUSG00000036249
Nmi	2961.41600735598	0.177577778018571	0.19668626214461	0.902847896351857	0.366606626934195	0.999971315249418	ENSMUSG00000026946
Rif1	3137.65156451837	-0.156726892297156	0.26394337933136	-0.59378982224971	0.552652697183956	0.999971315249418	ENSMUSG00000036202
Neb	18.6402874363665	-0.308194728824232	0.294838550773884	-1.04529997184999	0.295884350678603	0.999971315249418	ENSMUSG00000026950
Arl5a	3744.36472983453	0.07511929211012	0.137050846968571	0.548112571149206	0.5836146092268	0.999971315249418	ENSMUSG00000036093
Bloc1s2-ps	55.483346209639	-0.293953760144077	0.273697160641572	-1.07401099614998	0.282817753172341	0.999971315249418	ENSMUSG00000025201
Stam2	613.633732391024	-0.105450675123661	0.139746526413545	-0.754585304049749	0.450497844156705	0.999971315249418	ENSMUSG00000055371
Fmnl2	107.547459101729	-0.0469311188795643	0.243302661632432	-0.192891925491819	0.847043608807276	0.999971315249418	ENSMUSG00000036053
Prpf40a	13879.8273964023	-0.0754337845771702	0.0791450452741068	-0.953108110759389	0.340535297072119	0.999971315249418	ENSMUSG00000061136
Arl6ip6	965.100180353855	-0.252638316103313	0.23698983172601	-1.06603019320844	0.286409993379917	0.999971315249418	ENSMUSG00000026960
Gm13502	6615.54629155547	-0.160640118274786	0.315105184814237	-0.509798397539816	0.610192708464267	0.999971315249418	ENSMUSG00000083287
Nr4a2	15.6095397753778	0.228532210415661	0.365929656025062	0.624524978101281	0.532282871663078	0.999971315249418	ENSMUSG00000026826
A930012O16Rik	9.67172446682567	0.515993699692705	0.422762737366251	1.22052786134197	0.222264834312444	0.999971315249418	ENSMUSG00000054181
Gpd2	516.751161731199	-0.0622903172842875	0.115621400814558	-0.538743838471505	0.590063620300856	0.999971315249418	ENSMUSG00000026827
Gm13534	11.0607301809	0.186702635698076	0.501110148467513	0.372578037521385	0.709462521284348	0.999971315249418	ENSMUSG00000053472
Cytip	3062.60596989726	0.149748587744321	0.140228737257947	1.0678880140585	0.285571029799902	0.999971315249418	ENSMUSG00000026832
Gm13546	17.9586923309618	-0.100216505613629	0.30242144334358	-0.331380290053617	0.740357250910968	0.999971315249418	ENSMUSG00000086862
Acvr1	30.6923386324762	-0.171573062010781	0.370421815230951	-0.463182930799604	0.643233250146172	0.999971315249418	ENSMUSG00000026836
Pkp4	847.509398663615	-0.132814164769135	0.248757535827557	-0.533910115837471	0.593403722961143	0.999971315249418	ENSMUSG00000026991
Gm13549	49.8766323710084	0.364570250762464	0.214249539126748	1.70161509914281	0.0888275451621057	0.999971315249418	ENSMUSG00000080982
Gm13552	908.569835881354	-0.0142924446978625	0.252110977529338	-0.0566910843705698	0.954791276236582	0.999971315249418	ENSMUSG00000081157
Tanc1	191.464168272487	0.185441545219232	0.124447319725522	1.49012084493453	0.136192464206406	0.999971315249418	ENSMUSG00000035168
Wdsub1	98.5330639848101	-0.0915753559587433	0.188803708896062	-0.485029433448028	0.627655466997037	0.999971315249418	ENSMUSG00000026988
Baz2b	1236.93877857941	0.066164557692508	0.143400427280914	0.461397214409236	0.644513649675004	0.999971315249418	ENSMUSG00000026987
Marchf7	1929.516900424	-0.119457645813355	0.184790292100339	-0.646449791575038	0.517988103186337	0.999971315249418	ENSMUSG00000026977
Cd302	28.3137434631183	0.191371371938192	0.347475696941968	0.550747501544412	0.581806776879983	0.999971315249418	ENSMUSG00000060703
Rpl10a-ps4	57.1437795384445	0.677665523301999	0.351618163343247	1.9272767847333	0.0539451451738542	0.999971315249418	ENSMUSG00000080198
Ly75	2052.54354495095	-0.0199622991808637	0.256418426829157	-0.0778504861281438	0.937946986153582	0.999971315249418	ENSMUSG00000026980
Rbms1	2888.47490130472	0.00124517614668167	0.121063310327566	0.0102853304053271	0.991793638356215	0.999971315249418	ENSMUSG00000026970
Tank	2089.25102064271	-0.142935194719385	0.152142777939344	-0.939480642166072	0.347484026455666	0.999971315249418	ENSMUSG00000064289
Psmd14	8173.45972857273	-0.101368888017846	0.17672271851757	-0.57360416854253	0.566235690279081	0.999971315249418	ENSMUSG00000026914
Dpp4	1626.39405373629	0.162700697883901	0.235524683277387	0.690801047346199	0.489690577304805	0.999971315249418	ENSMUSG00000035000
Gm13561	24.8286487510999	-0.173446471736513	0.322541508763422	-0.537749303652365	0.590750135964651	0.999971315249418	ENSMUSG00000087518
ENSMUSG00000000392	6.24064146245138	0.77813538774448	0.578585382482681	1.34489292557918	0.178659815149208	0.999971315249418	ENSMUSG00000000392
Ifih1	2347.07678055512	-0.0492078105479238	0.145874302108766	-0.33733022085846	0.73586798044499	0.999971315249418	ENSMUSG00000026896
Gca	202.413096153676	-0.161016296999556	0.127718171895475	-1.26071564139935	0.207411316479793	0.999971315249418	ENSMUSG00000026893
Kcnh7	16.4437581049643	-0.156830029581726	0.308676644135112	-0.508072225617043	0.611402692511005	0.999971315249418	ENSMUSG00000059742
Gm13577	2749.02700068751	0.563963165835967	0.297646132564618	1.89474380525852	0.0581263512598527	0.999971315249418	ENSMUSG00000082127
Gm13578	15.8904655017781	0.220311354257522	0.404762860974253	0.544297354078481	0.586236867423286	0.999971315249418	ENSMUSG00000084104
Cobll1	553.204253021359	-0.172972409933908	0.170668125679974	-1.01350155012691	0.310820656086179	0.999971315249418	ENSMUSG00000034903
ENSMUSG00000057182	13.497630854751	-0.243984303744853	0.662568830160777	-0.368239936197494	0.712694334450389	0.999971315249418	ENSMUSG00000057182
Galnt3	42.3920363189801	0.309985329955161	0.276553407108451	1.1208877634026	0.2623356401672	0.999971315249418	ENSMUSG00000026994
Ttc21b	334.427159081828	-0.0482955594913364	0.139202185929609	-0.346945410151521	0.728632330642225	0.999971315249418	ENSMUSG00000034848
Stk39	1218.44503472386	-0.0499417937250741	0.162949169837301	-0.306486947892642	0.75923391607712	0.999971315249418	ENSMUSG00000027030
Cers6	107.68239824761	0.205412115518277	0.226462876111909	0.907045424154952	0.364382776731654	0.999971315249418	ENSMUSG00000027035
Nostrin	56.7407064626378	-0.0702472720279477	0.222011807771233	-0.316412323890143	0.751689564010306	0.999971315249418	ENSMUSG00000034738
Spc25	3723.27530086398	-0.0621341641389325	0.140008675893221	-0.443787956300079	0.657195896684226	0.999971315249418	ENSMUSG00000005233
Bbs5	86.0604399328298	-0.07108898032125	0.157782407283482	-0.450550739750896	0.65231337674169	0.999971315249418	ENSMUSG00000063145
Fastkd1	299.127332566116	-0.0718052066310291	0.120649599664849	-0.595154951450279	0.551739899516333	0.999971315249418	ENSMUSG00000027086
Ppig	17755.0236240206	0.163473017340168	0.338319497502193	0.483191239485417	0.628959955064261	0.999971315249418	ENSMUSG00000042133
Ccdc173	236.037177283851	0.130829123476065	0.258400607837333	0.506303466431565	0.612643629921919	0.999971315249418	ENSMUSG00000070883
Phospho2	520.901460867381	-0.0150445486018334	0.133659813888724	-0.112558503293731	0.910380585478426	0.999971315249418	ENSMUSG00000027088
Klhl23	9.57436776149479	0.373190307188912	0.409255444962563	0.911876217610374	0.361833882278063	0.999971315249418	ENSMUSG00000042155
Ssb	28436.4062931404	-0.137165550549397	0.116929916035971	-1.17305780419103	0.240772626118034	0.999971315249418	ENSMUSG00000068882
Mettl5	497.028001921933	-0.0636077311818575	0.195656865537358	-0.325098385927646	0.745106610511614	0.999971315249418	ENSMUSG00000051730
Mettl5os	32.8707521535527	0.763305634653341	0.70423750982641	1.08387528923515	0.278420097319753	0.999971315249418	ENSMUSG00000085735
Ubr3	1587.49830449486	-0.0553911380284284	0.233040959463085	-0.237688422481811	0.812122763891054	0.999971315249418	ENSMUSG00000044308
Myo3b	7.8540155910607	0.465268365106048	0.448419565821092	1.03757373801053	0.299468549709325	0.999971315249418	ENSMUSG00000042064
Rpl9-ps7	442.282368304934	-0.114902779031047	0.299519315652169	-0.383623936843135	0.701257195994713	0.999971315249418	ENSMUSG00000047965
Gorasp2	2329.87759347188	-0.0186814228949878	0.0880761679325024	-0.212105309909764	0.832024877243869	0.999971315249418	ENSMUSG00000014959
Tlk1	2549.22249370289	0.0355663414729038	0.290600188358437	0.122389258155039	0.902590745306559	0.999971315249418	ENSMUSG00000041997
Mettl8	134.604432587632	-0.059644281071011	0.180736469892057	-0.330006894052059	0.741394752969555	0.999971315249418	ENSMUSG00000041975
Dcaf17	580.508466726078	-0.0954126554013034	0.0984134864231487	-0.969507928934226	0.332291826095705	0.999971315249418	ENSMUSG00000041966
Dync1i2	2577.26514736216	0.0611680694943965	0.11315270879733	0.540579807099059	0.588797239193626	0.999971315249418	ENSMUSG00000027012
Slc25a12	747.137003139126	-0.0346269033677327	0.120674008077768	-0.286945829672098	0.774153798319286	0.999971315249418	ENSMUSG00000027010
Gm13641	10.4602518468895	0.176820933210737	0.437114487249568	0.404518583502775	0.685831415193528	0.999971315249418	ENSMUSG00000082190
Hat1	7812.84404662117	-0.127655878160148	0.220544549375181	-0.578821279064961	0.562709771506032	0.999971315249418	ENSMUSG00000027018
Gm13642	9.87446561883401	0.301609714596953	0.393362984865785	0.766746557762322	0.443232216455654	0.999971315249418	ENSMUSG00000086846
Metap1d	322.493943409304	-0.074534858985634	0.0992501003994163	-0.750980187281225	0.452664579625458	0.999971315249418	ENSMUSG00000041921
Dlx1as	7.95817903586636	0.174337149643244	0.414497415854728	0.420598881862139	0.674048010361001	0.999971315249418	ENSMUSG00000084946
Itga6	141.604626700766	0.180220358580419	0.199914052562974	0.901489196331756	0.367328275481694	0.999971315249418	ENSMUSG00000027111
Pdk1	3106.84977121243	-0.16560901412442	0.217745441268909	-0.760562485989767	0.446918433666623	0.999971315249418	ENSMUSG00000006494
Rapgef4	9.50144195673324	-0.100306153908488	0.430164458152409	-0.23318094279409	0.815620903450003	0.999971315249418	ENSMUSG00000049044
Map3k20	535.549595716329	0.0881186940975513	0.117328155981445	0.75104473739012	0.452625732247144	0.999971315249418	ENSMUSG00000004085
Cdca7	4405.00466599907	-0.216103403877927	0.141879532966232	-1.52314713306366	0.127721899109876	0.999971315249418	ENSMUSG00000055612
Sp3	2421.46090907222	-0.213393365751484	0.192411237207256	-1.10904835314596	0.267409323253066	0.999971315249418	ENSMUSG00000027109
Sp3os	101.523275686642	0.284830409644441	0.413320313539547	0.689127536958544	0.490743012458289	0.999971315249418	ENSMUSG00000063714
Ola1	6402.04906829558	-0.146241502238731	0.0853041061449892	-1.7143547813533	0.0864635878548525	0.999971315249418	ENSMUSG00000027108
Cir1	1364.55204765551	0.272603483910915	0.260629236634413	1.04594360721433	0.295587069462345	0.999971315249418	ENSMUSG00000041777
Scrn3	166.616020417478	0.0640661015166508	0.13181356706563	0.486035716526449	0.626941842881007	0.999971315249418	ENSMUSG00000008226
Gpr155	176.284631543923	-0.159293912345808	0.105857453643987	-1.50479637344702	0.132376436430065	0.999971315249418	ENSMUSG00000041762
Wipf1	4928.93895641701	-0.0161635567618889	0.0982162909960488	-0.164571036006024	0.869281630244873	0.999971315249418	ENSMUSG00000075284
Atf2	608.395748724828	-0.127968207022373	0.153914509363824	-0.831423934957819	0.405734182376468	0.999971315249418	ENSMUSG00000027104
Atp5g3	3663.93957020449	-0.0797372714230376	0.167607139416213	-0.475739110522189	0.634260253866739	0.999971315249418	ENSMUSG00000018770
Lnpk	992.004539931646	-0.146034660407838	0.152915847578023	-0.955000169837374	0.339577611073207	0.999971315249418	ENSMUSG00000009207
Mrpl23-ps1	509.579216653758	-0.03326495218507	0.36159570291557	-0.0919948769215247	0.926702109956802	0.999971315249418	ENSMUSG00000075279
Mtx2	1520.88597453092	-0.26423366825563	0.137013823571787	-1.92851831565147	0.0537906883116459	0.999971315249418	ENSMUSG00000027099
Rps6-ps4	71747.7237267114	-0.0477082122906601	0.301391292812467	-0.158293266688183	0.874225713657608	0.999971315249418	ENSMUSG00000081406
Gm13653	193.870045972754	0.50026410434575	0.328028833222316	1.52506137778048	0.127243789326379	0.999971315249418	ENSMUSG00000075276
Hnrnpa3	146238.384171646	-0.0188849808493559	0.121044194042634	-0.156017238156043	0.876019433526283	0.999971315249418	ENSMUSG00000059005
Nfe2l2	761.243364357624	-0.035316687347779	0.0775329958054017	-0.455505259159849	0.648745784870598	0.999971315249418	ENSMUSG00000015839
Agps	1525.71190526255	-0.0524095038086316	0.192998269967671	-0.27155426739012	0.785964767685686	0.999971315249418	ENSMUSG00000042410
Ttc30b	30.2983946160153	-0.23326532601302	0.315089420583354	-0.740314687751668	0.459109070780506	0.999971315249418	ENSMUSG00000075273
Ttc30a2	86.6088035347695	-0.0901033312252563	0.174251869117065	-0.517086741633306	0.605095608447048	0.999971315249418	ENSMUSG00000075272
Ttc30a1	184.969859623102	-0.155117258565721	0.146724677804969	-1.05719951739753	0.290420540043238	0.999971315249418	ENSMUSG00000075271
Prkra	39.4345065973554	-0.00283939348534367	0.209564998802443	-0.0135489871952347	0.9891898030505	0.999971315249418	ENSMUSG00000002731
Fkbp7	32.0638649316702	-0.330825641701018	0.306285682945757	-1.08012114219393	0.280088238239807	0.999971315249418	ENSMUSG00000002732
Plekha3	1041.6234221542	-0.0999439557175073	0.143318746560036	-0.697354380472765	0.485581043559937	0.999971315249418	ENSMUSG00000002733
Ttn	10.6929850126426	0.088648710450791	0.405889450360508	0.218406047193525	0.827112754289257	0.999971315249418	ENSMUSG00000051747
Sestd1	38.1684732184567	0.446775489864317	0.304783269019052	1.46587931582422	0.142681167896431	0.999971315249418	ENSMUSG00000042272
Gm13651	14.4883865634736	0.0987056575046016	0.337657905196543	0.292324438390232	0.770038575314511	0.999971315249418	ENSMUSG00000081611
Cwc22	4401.58111881763	-0.00338873900756562	0.0807891869608429	-0.0419454525419111	0.966542182372913	0.999971315249418	ENSMUSG00000027014
Ube2e3	1522.94038786882	-0.169018085058691	0.129778894453365	-1.30235417531181	0.192795339912645	0.999971315249418	ENSMUSG00000027011
Itga4	716.655857035427	0.308247910760706	0.269650793261362	1.14313741499708	0.252981542025303	0.999971315249418	ENSMUSG00000027009
Cerkl	22.0795269297033	0.104615907980012	0.315610056976488	0.331472035404136	0.740287960688489	0.999971315249418	ENSMUSG00000075256
Itprid2	635.798393167518	0.0107793527670292	0.215222864366556	0.050084607872658	0.960054965482058	0.999971315249418	ENSMUSG00000027007
Dnajc10	2359.43779017493	-0.0222074824478635	0.152039395886292	-0.146064000836153	0.883870864747956	0.999971315249418	ENSMUSG00000027006
Nckap1	50.0831698052516	0.409758167989984	0.345519425217205	1.18591933791392	0.235654155568053	0.999971315249418	ENSMUSG00000027002
Dusp19	79.3907883585781	0.132601578814519	0.200231195227273	0.662242357710594	0.507815911988984	0.999971315249418	ENSMUSG00000027001
Nup35	581.230877738068	-0.29511226166763	0.1412480599411	-2.08931904474081	0.0366790131485051	0.999971315249418	ENSMUSG00000026999
Gm13690	448.180303322844	-0.138713908960383	0.193173038647478	-0.718081104545454	0.472707280138894	0.999971315249418	ENSMUSG00000086436
Gm4735	8503.53464645767	-0.103374880111183	0.125268751679278	-0.825224796490756	0.409243978119125	0.999971315249418	ENSMUSG00000064193
Gm13680	560.10567812429	0.14648185279024	0.266641186249673	0.549359440116949	0.582758803100682	0.999971315249418	ENSMUSG00000081400
Zc3h15	10474.7042523382	-0.150773557454516	0.0945656134214271	-1.5943803672335	0.11085086699919	0.999971315249418	ENSMUSG00000027091
Itgav	469.401338889809	-0.0474839962863979	0.153068699989967	-0.310213624924692	0.756398510083356	0.999971315249418	ENSMUSG00000027087
Gm13698	17.0537771493217	0.235001188580863	0.351439519492535	0.668681737671948	0.503698519498015	0.999971315249418	ENSMUSG00000094125
Gm13693	17.1470507851187	0.218965176654257	0.352122313000324	0.621844082496569	0.534044396651097	0.999971315249418	ENSMUSG00000094336
Gm13695	14.1882872520839	0.305429875570856	0.345458373670597	0.884129315858158	0.376626409527308	0.999971315249418	ENSMUSG00000096729
Gm13696	17.048472666562	0.261070605374406	0.343839414461636	0.759280624599643	0.447684705319379	0.999971315249418	ENSMUSG00000096484
Gm13694	17.1421262603309	0.251155530820778	0.346373780978454	0.725099717742208	0.468390857566111	0.999971315249418	ENSMUSG00000096337
Gm13697	17.444730562259	0.245402410606356	0.349090921330521	0.702975630735491	0.482070936408465	0.999971315249418	ENSMUSG00000095824
Gm13691	17.7473348641872	0.239696542143891	0.353205996078252	0.678631010813267	0.497371688764888	0.999971315249418	ENSMUSG00000079247
Calcrl	163.822504880512	-0.0320666592488731	0.144509447543965	-0.221900088844484	0.824391661367698	0.999971315249418	ENSMUSG00000059588
Tfpi	120.697008640341	0.0367342676114202	0.187491633792963	0.195924836048866	0.844668997633795	0.999971315249418	ENSMUSG00000027082
Gm13710	31.6161078900702	0.977741636106082	0.596088320099655	1.64026303340857	0.100950488260663	0.999971315249418	ENSMUSG00000087362
Ctnnd1	18.6330880044457	0.0117142771185894	0.276641568626712	0.0423446019943449	0.966223989902256	0.999971315249418	ENSMUSG00000034101
Selenoh	4079.35520123492	0.0120098196865158	0.363054583927473	0.0330799285236818	0.973610848707007	0.999971315249418	ENSMUSG00000076437
Tmx2	655.81700863742	-0.0724929473308324	0.0741756177836295	-0.977315046330919	0.328413206343582	0.999971315249418	ENSMUSG00000050043
Med19	831.092370911575	-0.0121865579126657	0.139088862959086	-0.0876170647555761	0.93018103862752	0.999971315249418	ENSMUSG00000027080
Zdhhc5	1939.98551570267	0.158423075088086	0.218675735590914	0.724465723917601	0.468779862822938	0.999971315249418	ENSMUSG00000034075
Clp1	879.03347649692	-0.101146362595932	0.0720785261358834	-1.4032801170941	0.160533324855734	0.999971315249418	ENSMUSG00000027079
Ube2l6	500.387639528469	0.307101271582072	0.168560304390106	1.8219074336229	0.0684690322025018	0.999971315249418	ENSMUSG00000027078
Timm10	867.820524304813	-0.0183039159794572	0.291357312000081	-0.0628229161430899	0.949907517467023	0.999971315249418	ENSMUSG00000027076
Slc43a1	82.903507322728	0.196803897575236	0.143095508046878	1.37533246334165	0.169028396468409	0.999971315249418	ENSMUSG00000027075
Slc43a3	1503.93259662759	0.0122674739915248	0.171114155715213	0.0716917541991186	0.94284721847363	0.999971315249418	ENSMUSG00000027074
Prg2	14.0575690469685	0.226565912630622	0.379377347074008	0.59720464170578	0.550370760555577	0.999971315249418	ENSMUSG00000027073
Prg3	7.99480947120649	0.132833940414833	0.541520194972127	0.245298220912463	0.806225529185435	0.999971315249418	ENSMUSG00000027072
P2rx3	17.9732456384786	0.365911765423324	0.396605312458315	0.922609339636071	0.35621082674721	0.999971315249418	ENSMUSG00000027071
Ssrp1	32358.1484185526	0.0437337275747578	0.132743856150774	0.329459523347611	0.741808383410029	0.999971315249418	ENSMUSG00000027067
Tnks1bp1	814.252497871156	0.166698154199553	0.238383664681997	0.699285139449163	0.484373852163186	0.999971315249418	ENSMUSG00000033955
Gm13736	156.599440436208	0.0718114903676404	0.274192770098497	0.261901472974083	0.793397403978032	0.999971315249418	ENSMUSG00000082908
Gm13740	7.27008994143499	1.0153093398985	0.559802363419813	1.81369248549794	0.0697250826310257	0.999971315249418	ENSMUSG00000082417
Gm13768	14.4748886267986	0.00155368036762723	0.417544927535893	0.00372098968318486	0.997031086632027	0.999971315249418	ENSMUSG00000080223
Gm13767	20.4032159865223	-0.135055710717574	0.605717900545179	-0.222968003085292	0.823560409476401	0.999971315249418	ENSMUSG00000085547
Ptprj	492.97359584337	0.219786292686258	0.105804361952678	2.07728952407991	0.0377748453762482	0.999971315249418	ENSMUSG00000025314
Nup160	2085.31461801849	-0.134576410197048	0.1380308952042	-0.97497310292713	0.329573602090983	0.999971315249418	ENSMUSG00000051329
Fnbp4	5099.76959872509	-0.043769481879208	0.211659700883591	-0.206791759113751	0.836172492325131	0.999971315249418	ENSMUSG00000008200
Rpl30-ps3	9.0620211692384	0.364645835150179	0.480378469173798	0.759080305529374	0.447804519566647	0.999971315249418	ENSMUSG00000080873
Gm13772	64.8889431658297	0.451544920805389	0.27338820473922	1.65166204312329	0.0986034644857327	0.999971315249418	ENSMUSG00000080977
Mtch2	2979.91526058905	-0.16358580688156	0.208028148575239	-0.786363807022944	0.43165438081225	0.999971315249418	ENSMUSG00000027282
C1qtnf4	9.24162901420843	0.223326411046942	0.568458229222631	0.392863361926068	0.694420403253631	0.999971315249418	ENSMUSG00000040794
Ndufs3	1754.46218849139	0.14133379396918	0.268104076664658	0.527160182446456	0.598082356778263	0.999971315249418	ENSMUSG00000005510
Kbtbd4	204.395769891234	-0.118099790438491	0.296421222236378	-0.398418809380366	0.690321495248437	0.999971315249418	ENSMUSG00000005505
Ptpmt1	477.183284326185	-0.0772026978693942	0.294500122592607	-0.262148270736687	0.793207132981287	0.999971315249418	ENSMUSG00000063235
Celf1	5186.67714050931	0.0363420441601819	0.0896586551402436	0.405337823808933	0.685229207342115	0.999971315249418	ENSMUSG00000005506
Psmc3	9390.07019582248	0.020632206857525	0.114577929590659	0.180071388366291	0.857096524195732	0.999971315249418	ENSMUSG00000002102
Slc39a13	113.138147159788	-0.0536079872643803	0.146736998846835	-0.365333812778443	0.714862241202906	0.999971315249418	ENSMUSG00000002105
Spi1	1024.42066280381	-0.0222357477532515	0.14101815022423	-0.157680041313086	0.874708928454199	0.999971315249418	ENSMUSG00000002111
Mybpc3	14.3472207899058	-0.163002079687115	0.337382164101898	-0.483137809377154	0.628997889491897	0.999971315249418	ENSMUSG00000002100
Madd	741.566881983294	0.159934319567077	0.169844852843426	0.941649492990615	0.346372121461908	0.999971315249418	ENSMUSG00000040687
Acp2	59.3438446549831	0.363606151822596	0.290313663452418	1.25245965862778	0.2104024192912	0.999971315249418	ENSMUSG00000002103
Ddb2	251.278229432777	0.0509691161202988	0.133293567470624	0.38238241415162	0.702177732592624	0.999971315249418	ENSMUSG00000002109
Pacsin3	60.5129014553504	0.287848440523321	0.218680134894649	1.31629898921544	0.188073709994866	0.999971315249418	ENSMUSG00000027257
Arfgap2	818.055209019635	-0.0589995199523286	0.276240802694307	-0.2135800337129	0.830874570915363	0.999971315249418	ENSMUSG00000027255
1110051M20Rik	102.232350206832	-0.173976538173274	0.178647579119354	-0.973853320772066	0.330129373754052	0.999971315249418	ENSMUSG00000040591
Ckap5	2647.38217785444	0.0263400106328168	0.246874008048956	0.106694142655931	0.915031629565668	0.999971315249418	ENSMUSG00000040549
ENSMUSG00000083832	25.0123752295695	0.498552115626911	0.436211458085265	1.14291384691105	0.253074362834771	0.999971315249418	ENSMUSG00000083832
Zfp408	424.848854060962	0.100429454819461	0.107852931658802	0.93117037501748	0.351765439646494	0.999971315249418	ENSMUSG00000075040
Arhgap1	642.055006806985	-0.112370980662633	0.184457924309717	-0.60919573438306	0.54239470737695	0.999971315249418	ENSMUSG00000027247
Atg13	192.508833023851	0.0815253876314836	0.157895421246323	0.516325216956742	0.605627286781581	0.999971315249418	ENSMUSG00000027244
Harbi1	151.01207176587	0.0476029811743468	0.114143414585043	0.417045357784353	0.676645231390298	0.999971315249418	ENSMUSG00000027243
Ambra1	683.074924804876	0.141186196857069	0.143007548843036	0.987263945150433	0.323513261005919	0.999971315249418	ENSMUSG00000040506
Mdk	32.1127641093077	0.326784491085354	0.432126127055255	0.756224793238593	0.449514430140582	0.999971315249418	ENSMUSG00000027239
Dgkz	1423.45808554639	-0.11008976308735	0.191833556858363	-0.573881675814586	0.566047873799565	0.999971315249418	ENSMUSG00000040479
Gm9821	10.835629532228	0.237085849975201	0.646984055707014	0.366447747643669	0.714030996249755	0.999971315249418	ENSMUSG00000095332
Creb3l1	7.26368355735954	-0.313648550692964	0.538951884369071	-0.581960207932365	0.560593484196707	0.999971315249418	ENSMUSG00000027230
Phf21a	983.600150546504	0.143416338309349	0.186601552358439	0.768569910039463	0.442148673999175	0.999971315249418	ENSMUSG00000058318
Pex16	306.388566314753	-0.0859384505255246	0.15931129230294	-0.539437282086114	0.589585161910809	0.999971315249418	ENSMUSG00000027222
1700029I15Rik	21.1658245323002	0.092759446771677	0.277270129560088	0.334545401334242	0.737968037099516	0.999971315249418	ENSMUSG00000044916
Cry2	167.825103322749	0.154640415395638	0.194879626471811	0.79351760979492	0.427476313576816	0.999971315249418	ENSMUSG00000068742
Slc35c1	373.973669102881	0.0317557075316902	0.221954524270154	0.143073035506312	0.886232500377307	0.999971315249418	ENSMUSG00000049922
Prdm11	106.602944601646	-0.0803181505233916	0.18537562106168	-0.433272455479284	0.664816846369332	0.999971315249418	ENSMUSG00000075028
Trp53i11	1132.82541199198	0.0697544072684938	0.163960338820774	0.425434637243235	0.670519860529474	0.999971315249418	ENSMUSG00000068735
Gm13807	14.4583429196854	0.556091836764107	0.484289731772796	1.14826270366805	0.250860130828633	0.999971315249418	ENSMUSG00000085852
Cd82	3623.68981915863	-0.0336037577477303	0.156831669770454	-0.214266402933249	0.830339316186673	0.999971315249418	ENSMUSG00000027215
Ext2	571.143867739539	0.0461177982973435	0.0927047408319305	0.49746968583789	0.618857874836353	0.999971315249418	ENSMUSG00000027198
Accs	31.1378413425923	0.192682559621695	0.221099621085271	0.871473947697917	0.383495424736033	0.999971315249418	ENSMUSG00000040272
Alkbh3	395.87457889539	-0.0217128686261264	0.114268467007141	-0.190016276535587	0.849296376062465	0.999971315249418	ENSMUSG00000040174
Hsd17b12	2970.28999488295	-0.0453061417480449	0.0738288805509575	-0.613664211213038	0.539437242569921	0.999971315249418	ENSMUSG00000027195
Ttc17	332.063364774527	0.109486949881136	0.230804295142985	0.474371370833063	0.635235104868391	0.999971315249418	ENSMUSG00000027194
Itpa-ps1	35.7823395602396	-0.185946114657164	0.213373924068965	-0.871456601215547	0.383504892308411	0.999971315249418	ENSMUSG00000081476
2810002D19Rik	87.8616251768616	0.0375444520419291	0.144847720970863	0.259199466793691	0.795481342486582	0.999971315249418	ENSMUSG00000045464
Api5	4335.60012458697	-0.143582886045776	0.140401111301886	-1.02266203389978	0.306467668119279	0.999971315249418	ENSMUSG00000027193
Gm13803	50.2318320623455	0.274569674933857	0.252995279010575	1.08527588343805	0.277799483874487	0.999971315249418	ENSMUSG00000082820
ENSMUSG00000075015	6.7842724045159	-0.472864805891751	1.13716314463731	-0.415828465881707	0.677535527408212	0.999971315249418	ENSMUSG00000075015
Gm10800	122.421518629492	-1.36962301838929	1.19991116789931	-1.14143701219741	0.253688109771829	0.999971315249418	ENSMUSG00000075014
B230118H07Rik	30.7148752226826	0.059196012100153	0.326213916577389	0.181463785240167	0.856003556404198	0.999971315249418	ENSMUSG00000027165
Traf6	842.70676742198	-0.0342559355377114	0.128085078567425	-0.267446730882699	0.789125223286829	0.999971315249418	ENSMUSG00000027164
Prr5l	7.0819429650584	0.916698502032699	0.491190772758752	1.86627793694922	0.0620024899420085	0.999971315249418	ENSMUSG00000032841
Commd9	204.894344224717	0.0181097005654034	0.240734868009551	0.0752267451538634	0.940034305084913	0.999971315249418	ENSMUSG00000027163
Ldlrad3	66.1089008970059	-0.12177182420815	0.206218746329868	-0.590498324596364	0.554856608664428	0.999971315249418	ENSMUSG00000048058
Gm13921	13.4300730803925	0.18480568053829	0.376930071261641	0.490291687048788	0.62392750861504	0.999971315249418	ENSMUSG00000082328
Trim44	2865.71663351314	0.0404933699059075	0.196264461019503	0.206320439755435	0.836540613378986	0.999971315249418	ENSMUSG00000027189
Gm13868	32.9775682609719	1.42384701783287	1.01189759090027	1.40710584809881	0.159396004257143	0.999971315249418	ENSMUSG00000083306
Slc1a2	74.9531157832973	-0.0652649249453502	0.221217179622966	-0.295026476047589	0.767973654439313	0.999971315249418	ENSMUSG00000005089
Cd44	6079.95346665703	-0.0320728950069638	0.116016031006107	-0.276452268956482	0.782200715426246	0.999971315249418	ENSMUSG00000005087
Pdhx	1147.54755558599	-0.0632212496066854	0.14220728748858	-0.444571095639261	0.656629739620822	0.999971315249418	ENSMUSG00000010914
Apip	968.420642482242	0.0207326438167145	0.269746387976236	0.0768597643596289	0.938735106211174	0.999971315249418	ENSMUSG00000010911
Cat	1035.34203297043	-0.026807660772443	0.206254192294693	-0.129973895193076	0.896587080087986	0.999971315249418	ENSMUSG00000027187
Abtb2	151.714561172758	-0.015999020141543	0.136053107128394	-0.117593934304232	0.906389411322879	0.999971315249418	ENSMUSG00000032724
Nat10	4550.73593954915	-0.0441082254160204	0.171664508726044	-0.256944348854379	0.79722173412526	0.999971315249418	ENSMUSG00000027185
Caprin1	17659.5372584956	-0.0851948321071201	0.215045707632075	-0.396170809662851	0.691979023841363	0.999971315249418	ENSMUSG00000027184
Lmo2	6939.80980365273	-0.248196215685407	0.121078903379013	-2.0498716849828	0.0403769539557891	0.999971315249418	ENSMUSG00000032698
4931422A03Rik	12.1577735627267	0.223323208839053	0.531475787513703	0.420194511369523	0.674343364016092	0.999971315249418	ENSMUSG00000046085
Fbxo3	1184.74565586552	-0.181702454958239	0.155315363828449	-1.16989363112161	0.2420437772234	0.999971315249418	ENSMUSG00000027180
Cd59a	7.92886628221948	0.584015331329463	0.628914619461909	0.928608293172034	0.353092122421341	0.999971315249418	ENSMUSG00000032679
Gm13882	18.2672349002793	0.699199163059285	0.429479799180016	1.62801408679577	0.10352189884937	0.999971315249418	ENSMUSG00000081721
Hipk3	960.149669251299	-0.134478097912988	0.15542078901956	-0.865251674253585	0.386900668783652	0.999971315249418	ENSMUSG00000027177
Cstf3	2071.43899132288	-0.0409269599172071	0.146521999781001	-0.279322968416884	0.779996981235971	0.999971315249418	ENSMUSG00000027176
Tcp11l1	17.0508723639623	0.245817968995734	0.345553400195035	0.711374765396581	0.476852032077564	0.999971315249418	ENSMUSG00000027175
Depdc7	8.11649160926377	-0.533756268676613	0.449034228607478	-1.18867612906008	0.23456713753444	0.999971315249418	ENSMUSG00000027173
Qser1	385.043894478115	-0.00631435411216059	0.241136299763773	-0.0261858298329468	0.979109118163309	0.999971315249418	ENSMUSG00000074994
Prrg4	24.7559586129767	0.941285233735848	0.596010001705557	1.5793111374679	0.114264708478574	0.999971315249418	ENSMUSG00000027171
Ccdc73	18.8858216000972	-0.430402538138957	0.260681846762676	-1.65106448141283	0.0987254089732277	0.999971315249418	ENSMUSG00000045106
Eif3m	6741.68211226048	-0.106645090522911	0.190618533674413	-0.559468633333769	0.575841932338715	0.999971315249418	ENSMUSG00000027170
Rcn1	1122.56712225118	-0.0337882466327865	0.120494253053861	-0.280413760627098	0.779160080925072	0.999971315249418	ENSMUSG00000005973
Rpl10-ps1	2467.66083976001	0.153807925859333	0.200072711597202	0.768760140408294	0.442035715386571	0.999971315249418	ENSMUSG00000080859
Elp4	405.778802351972	-0.196665587099795	0.110878917879905	-1.773696847518	0.0761133081822045	0.999971315249418	ENSMUSG00000027167
Immp1l	403.289786114748	-0.128354324052182	0.192079817982143	-0.668234306969799	0.503984039546538	0.999971315249418	ENSMUSG00000042670
Dnajc24	773.685100462041	-0.0445207984155174	0.192577327790893	-0.231184007620355	0.81717185358173	0.999971315249418	ENSMUSG00000027166
Arl14ep	1538.93585986909	-0.0551440622887857	0.0948749950266141	-0.581228618492331	0.561086382111985	0.999971315249418	ENSMUSG00000027122
Rpl35a-ps4	1929.98581974406	0.276177363175152	0.378084024569091	0.730465571746694	0.465105649992578	0.999971315249418	ENSMUSG00000083424
Hadhb-ps	230.502196819849	-0.127584667533112	0.126960000876274	-1.00492018472374	0.31493528419454	0.999971315249418	ENSMUSG00000063684
Mettl15	77.6723109065391	-0.0936537079994373	0.207638204785502	-0.451042755335825	0.651958734263542	0.999971315249418	ENSMUSG00000057234
Kif18a	771.836932168918	-0.130696519696601	0.203008432557342	-0.643798476990283	0.51970612150924	0.999971315249418	ENSMUSG00000027115
Lin7c	1965.7386721218	-0.0997517320227486	0.134303709244201	-0.742732517099526	0.457643638772231	0.999971315249418	ENSMUSG00000027162
Lgr4	43.3780788190399	-0.246104758814925	0.286865789657628	-0.857909056038539	0.390942683216785	0.999971315249418	ENSMUSG00000050199
Ccdc34	6012.81682164463	0.372944595231806	0.455509272445018	0.81874204937688	0.412933600302452	0.999971315249418	ENSMUSG00000027160
Gm13935	6.59408112333821	0.492233063767971	0.520855961317227	0.945046424203595	0.344635175548991	0.999971315249418	ENSMUSG00000083320
ENSMUSG00000109813	10.7242972422132	0.439826872529141	0.637305266762829	0.690135317354629	0.490109095201343	0.999971315249418	ENSMUSG00000109813
Lpcat4	248.100881803544	-0.00712836713702471	0.138861028577588	-0.0513345407998456	0.95905894479992	0.999971315249418	ENSMUSG00000027134
Nop10	969.79023814384	-0.250782414732343	0.227178613553141	-1.10389975011306	0.269636627293768	0.999971315249418	ENSMUSG00000027133
Slc12a6	602.318625030891	0.0504555939577573	0.196564617126597	0.256687061462651	0.797420360432729	0.999971315249418	ENSMUSG00000027130
Emc4	1122.77820449606	-0.0917316425030937	0.199990860650811	-0.458679172661092	0.646464572512078	0.999971315249418	ENSMUSG00000027131
Katnbl1	612.400989370848	-0.230089812411672	0.110731377845871	-2.07790977487825	0.0377176700492893	0.999971315249418	ENSMUSG00000027132
Emc7	1170.61513683417	-0.0644860715441264	0.0829664006324101	-0.777255263005051	0.43700818357387	0.999971315249418	ENSMUSG00000055943
Aven	1902.5481661103	-0.107668379476746	0.147307675041465	-0.730908144782263	0.46483526076512	0.999971315249418	ENSMUSG00000003604
Arhgap11a	8357.02502442017	0.0269998242011518	0.163132136467275	0.165508922924994	0.868543427210891	0.999971315249418	ENSMUSG00000041219
Gm21596	39032.8646647896	0.108541133580301	0.272990299008956	0.397600698538888	0.690924545525952	0.999971315249418	ENSMUSG00000096006
Aqr	2106.06700110197	-0.0120091464856249	0.261261458250032	-0.0459660087869983	0.963337342317325	0.999971315249418	ENSMUSG00000040383
Zfp770	638.277002419146	-0.186303529659349	0.124663734775719	-1.49444848571661	0.135058436788454	0.999971315249418	ENSMUSG00000040321
Dph6	594.05558889286	-0.129849825899493	0.233791907346511	-0.555407701546478	0.578615825952665	0.999971315249418	ENSMUSG00000057147
BC052040	242.2982016016	-0.0730713327275522	0.11732770898705	-0.622796893917166	0.533417999727464	0.999971315249418	ENSMUSG00000040282
Spred1	512.369444544506	0.0965015195163613	0.142335259641359	0.677987448503734	0.497779651479298	0.999971315249418	ENSMUSG00000027351
Fam98b	2263.68906000275	-0.0752221969909327	0.0845100902140869	-0.890097227447925	0.373413681587946	0.999971315249418	ENSMUSG00000027349
Rasgrp1	593.826260809853	-0.00899162615940274	0.0859157215266378	-0.104656353920218	0.91664849622282	0.999971315249418	ENSMUSG00000027347
Fsip1	13.632077375987	0.164225959453553	0.343669744094244	0.477859812438181	0.632749986399647	0.999971315249418	ENSMUSG00000027344
Eif2ak4	553.443385795269	-0.0798048599133195	0.253964703176894	-0.314236029318346	0.753341780137858	0.999971315249418	ENSMUSG00000005102
Srp14	3831.34333981185	-0.00732473139741144	0.255671212164796	-0.0286490267535094	0.977144510418362	0.999971315249418	ENSMUSG00000009549
Bmf	38.989823840585	-0.00599370593504739	0.263262584384081	-0.0227670253601363	0.981836111153913	0.999971315249418	ENSMUSG00000040093
Bub1b	4351.80007170291	0.100803817607868	0.32926836373773	0.306144861484963	0.759494352112476	0.999971315249418	ENSMUSG00000040084
Pak6	6.92533370528175	0.877570823262433	0.430660236408522	2.03773357526785	0.0415765844910319	0.999971315249418	ENSMUSG00000074923
Plcb2	206.588752141789	-0.00406976832814516	0.269512962594444	-0.0151004548685446	0.987952038071245	0.999971315249418	ENSMUSG00000040061
Inafm2	368.379191429388	-0.0128382931793079	0.123578258687624	-0.103887959869704	0.917258262035516	0.999971315249418	ENSMUSG00000074918
Knstrn	1937.44035842876	0.0791168709613209	0.114651665316867	0.690062989862926	0.490154576195509	0.999971315249418	ENSMUSG00000027331
Gm14091	18.9618667561247	0.118108574015451	0.384113893158193	0.307483212971964	0.758475598658421	0.999971315249418	ENSMUSG00000086421
Ivd	649.861578318333	0.0245331456547957	0.100747309594731	0.243511670470243	0.80760904543699	0.999971315249418	ENSMUSG00000027332
Bahd1	937.285692138717	0.0164001271714877	0.0600567088792956	0.273077354346028	0.784793753996318	0.999971315249418	ENSMUSG00000040007
Chst14	64.7017049197946	-0.300835787987864	0.147402345344162	-2.04091588424498	0.0412591886802999	0.999971315249418	ENSMUSG00000074916
Ccdc32	438.28576937912	-0.100464318641276	0.113958072875347	-0.881590185814818	0.377998464283165	0.999971315249418	ENSMUSG00000039983
Rpusd2	261.557451170988	-0.0703419395045789	0.196671211259734	-0.357662613933271	0.720595814468921	0.999971315249418	ENSMUSG00000027324
Knl1	1863.12006886022	-0.032184860043832	0.253001990580059	-0.127211884657673	0.898772699207864	0.999971315249418	ENSMUSG00000027326
Rad51	2260.68129242514	-0.0931476122786888	0.121547638313715	-0.766346541742544	0.443470132161516	0.999971315249418	ENSMUSG00000027323
Rmdn3	1028.09739321534	-0.0875102304841676	0.0930081925683184	-0.940887335488083	0.346762598341891	0.999971315249418	ENSMUSG00000070730
Dnajc17	931.043346287669	0.1564144158095	0.264921115103582	0.590418833728458	0.554909887018105	0.999971315249418	ENSMUSG00000034278
Gm14137	12.8737050386486	0.71694905445273	0.456901036670629	1.56915611239806	0.116611567646156	0.999971315249418	ENSMUSG00000055926
Gm14138	10.4089484936506	0.364969014915099	0.376266537222205	0.969974682334201	0.332059112006844	0.999971315249418	ENSMUSG00000081572
Zfyve19	526.912438597096	-0.00944648073755249	0.137641181658687	-0.0686312092334199	0.945283176053142	0.999971315249418	ENSMUSG00000068580
Vps18	418.134394232799	0.133820992640353	0.119003919691835	1.12450911690042	0.260797105042054	0.999971315249418	ENSMUSG00000034216
Chac1	207.396014342424	0.00925596802215469	0.16585637777429	0.05580712750613	0.955495456866268	0.999971315249418	ENSMUSG00000027313
Ino80	1575.42651592947	0.0549089460899413	0.109095896476376	0.503308995694731	0.614747042796348	0.999971315249418	ENSMUSG00000034154
Exd1	11.0601241831073	0.574162515953498	0.408722380893386	1.40477385823231	0.160088535002947	0.999971315249418	ENSMUSG00000048647
Chp1	1292.33173214065	0.00731464406014381	0.0999226346611421	0.0732030744080083	0.941644519930348	0.999971315249418	ENSMUSG00000014077
Oip5os1	3382.63821243967	0.0423626890510624	0.0654380055646004	0.647371335442703	0.517391643074595	0.999971315249418	ENSMUSG00000085438
Oip5	582.83838488602	-0.14896042426762	0.13061673781111	-1.14043901848963	0.254103444950587	0.999971315249418	ENSMUSG00000072980
Nusap1	3980.89557081146	0.0972443212843327	0.154400494300573	0.629818717387175	0.528813198045532	0.999971315249418	ENSMUSG00000027306
Ndufaf1	846.356050131299	-0.0949841591974751	0.169793759392656	-0.559409012069871	0.575882612276277	0.999971315249418	ENSMUSG00000027305
H3f3c	597.643378727614	-0.0924247183382654	0.139286715207609	-0.663557311984168	0.506973686582138	0.999971315249418	ENSMUSG00000082029
Rtf1	6304.32689116918	0.343669977207716	0.410585824509656	0.837023483745807	0.40257936795945	0.999971315249418	ENSMUSG00000027304
Ltk	19.0637593214317	0.241073246966892	0.340841123546909	0.707289204008605	0.479386773211623	0.999971315249418	ENSMUSG00000027297
Rpap1	615.011781758012	-0.00695355580481199	0.221666072879109	-0.0313695087141472	0.974974857699825	0.999971315249418	ENSMUSG00000034032
Tyro3	32.5588998358291	0.590399827791109	0.29289873489013	2.01571313721302	0.0438299810835838	0.999971315249418	ENSMUSG00000027298
Mga	1900.08615648835	0.132632680469525	0.220230696578369	0.60224429441573	0.547011535114603	0.999971315249418	ENSMUSG00000033943
Mapkbp1	256.102630755223	0.114737971416765	0.147422424362899	0.778293885157682	0.436395779542872	0.999971315249418	ENSMUSG00000033902
Ehd4	1324.82009015232	0.123518946041061	0.107300834949361	1.15114617793379	0.24967210315186	0.999971315249418	ENSMUSG00000027293
Vps39	741.1171502641	0.0299860131629368	0.237239264283329	0.126395659055515	0.899418738167985	0.999971315249418	ENSMUSG00000027291
Tmem87a	907.519757802671	0.0660234179742841	0.116772149347215	0.565403808556845	0.571799134672725	0.999971315249418	ENSMUSG00000033808
Ganc	153.494914311855	0.017040074223212	0.192391484448941	0.0885697944065413	0.92942381428645	0.999971315249418	ENSMUSG00000062646
Zfp106	8272.99380327334	0.083179816715936	0.110868519711289	0.750256402200941	0.453100295001749	0.999971315249418	ENSMUSG00000027288
Snap23	827.905589177511	-0.0052994388959426	0.177479834346299	-0.0298593860844061	0.976179196604431	0.999971315249418	ENSMUSG00000027287
Lrrc57	259.64771136284	-0.121204135464725	0.17467189664775	-0.693896029016906	0.487747414078397	0.999971315249418	ENSMUSG00000027286
Stard9	14.707058184625	-0.348581596311695	0.410828504818574	-0.848484445999267	0.396168231097166	0.999971315249418	ENSMUSG00000033705
Cdan1	500.147727990406	-0.0610815185340515	0.0673771149534266	-0.906561798858161	0.36463857079416	0.999971315249418	ENSMUSG00000027284
Ttbk2	65.3881576141783	0.011977081155386	0.240463660353436	0.0498082792958486	0.960275168950148	0.999971315249418	ENSMUSG00000090100
AV039307	7.30005737362163	-0.392341698030081	0.567686222398474	-0.691124220652101	0.489487480508516	0.999971315249418	ENSMUSG00000087519
Ubr1	843.918434882638	0.0130203598860977	0.219627898223231	0.0592837248429331	0.95272612400733	0.999971315249418	ENSMUSG00000027272
Tmem62	105.185465550729	0.175524109690547	0.143718326069237	1.22130638792709	0.221970035690139	0.999971315249418	ENSMUSG00000054484
[truncated: 19,571 more rows]
