# Supplementary material for: The structure-selective endonucleases GEN1 and MUS81 mediate complementary functions in safeguarding the genome of proliferating B lymphocytes
Source: eLife. 2022 Oct 3;11:e77073. doi: 10.7554/eLife.77073 (PMC9581529; doi:10.7554/eLife.77073)
Supplement: Figure 4—source data 1. [file elife-77073-fig4-data1.csv]

	baseMean	log2FoldChange	lfcSE	stat	pvalue	padj	ENSEMBL
Ccng1	7806.222667156	1.66033678696272	0.0595867974492161	27.8641722334176	7.25424528156765e-171	1.23996814597836e-166	ENSMUSG00000020326
Plk2	440.153375273343	3.67860598692444	0.141090267469988	26.0727125470007	7.43685367857728e-150	6.35590699639607e-146	ENSMUSG00000021701
Phlda3	455.135615474678	3.83860177197135	0.15433825212094	24.8713570305526	1.51930666645716e-136	8.65650294991739e-133	ENSMUSG00000041801
Psrc1	1130.3813924638	2.43212188823261	0.104416424450562	23.2925222351791	5.27857742269749e-120	2.2556680971542e-116	ENSMUSG00000068744
Zfp365	240.175304139662	2.75828633393801	0.123946750995514	22.2538010216809	1.03627425877541e-109	3.54260718104963e-106	ENSMUSG00000037855
Ddias	1050.63670580099	1.35055168174303	0.0620227158606391	21.7751135693192	3.99479469917278e-105	1.13805042988267e-101	ENSMUSG00000030641
Trp53inp1	1289.83639821639	2.52194071124512	0.116319236098213	21.681200769886	3.08719595147459e-104	6.59618004981939e-101	ENSMUSG00000028211
Cdkn1a	685.755956027785	3.75935611169854	0.17338033827959	21.6827129823468	2.98740776427506e-104	6.59618004981939e-101	ENSMUSG00000023067
Inka2	219.475812566229	3.39331690796291	0.161208175117162	21.04928553094	2.32152915955357e-98	4.40909976936102e-95	ENSMUSG00000048458
Dglucy	503.842588589834	3.38354424374938	0.173482699739135	19.5036407021403	1.02239015908533e-84	1.74757149892455e-81	ENSMUSG00000021185
Cd80	362.732842872449	2.85292912671731	0.16079678741321	17.742451031599	1.9714491624427e-70	3.06345277578482e-67	ENSMUSG00000075122
Ei24	2613.99861496125	0.938975324014171	0.0567281742838259	16.5521865610593	1.54391883747252e-61	2.19918372407649e-58	ENSMUSG00000062762
Zmat3	450.791716871709	2.28936412591003	0.139518356764953	16.4090531095269	1.64754943650692e-60	2.16627403986253e-57	ENSMUSG00000027663
Serpine2	176.039734661517	3.71392661085839	0.226913073758656	16.367177744939	3.28078868987933e-60	4.00560864829338e-57	ENSMUSG00000026249
Cdc42bpg	233.568259278759	2.16866714408583	0.13634681767741	15.9055207963621	5.80188174460167e-57	6.61143764403176e-54	ENSMUSG00000024769
Tnfsf4	67.9472002225685	4.71762429779901	0.303140555383689	15.5624980360277	1.30889055143014e-54	1.39830413722471e-51	ENSMUSG00000026700
Nr4a1	274.104557087099	2.19649933881028	0.150986475368157	14.5476562285096	6.04385328238461e-48	6.07691671504707e-45	ENSMUSG00000023034
Enc1	146.759418430734	2.00156587453015	0.138957872007825	14.4041200804905	4.87486814506791e-47	4.6292289557581e-44	ENSMUSG00000041773
Bbc3	1116.78660538254	1.4911309692875	0.107501664204738	13.870771027764	9.52474147653108e-44	8.56875821359715e-41	ENSMUSG00000002083
Polk	692.202627199015	1.12983754708265	0.0820787886918331	13.7652804712391	4.1228112349724e-43	3.52356062196916e-40	ENSMUSG00000021668
Ak1	48.7167287192539	4.92437190512748	0.377697749807384	13.037864026563	7.45154663648501e-39	6.06520412654468e-36	ENSMUSG00000026817
Slc19a2	704.696634687268	1.52372478336788	0.116901303446729	13.0342839510103	7.80967406775623e-39	6.06776176546169e-36	ENSMUSG00000040918
Tnfrsf10b	208.799650884755	1.84642948775436	0.147899979148613	12.4843120221067	9.09258775535761e-36	6.75737402184033e-33	ENSMUSG00000022074
Cox6b2	144.614454591526	3.78737251854766	0.306272254301717	12.3660320690251	3.99052644951147e-35	2.84208619172915e-32	ENSMUSG00000051811
ENSMUSG00000032128	52.3589466499754	5.82030985494692	0.47097774085754	12.357929791649	4.41377561631185e-35	3.01778666438474e-32	ENSMUSG00000032128
Cep170b	286.918362322687	1.64425092657076	0.133474867956939	12.3188054181198	7.17492261756266e-35	4.71695970392302e-32	ENSMUSG00000072825
Hmcn2	53.5144343868212	3.51111076851184	0.289379409699927	12.133243246825	7.04047620804403e-34	4.45714295644802e-31	ENSMUSG00000055632
Kank3	116.430244279974	1.81326386431447	0.151224604887421	11.9905346465567	3.98325840016727e-33	2.43163699407354e-30	ENSMUSG00000042099
Zfp874a	213.370636806055	1.47704860589323	0.12390092311349	11.9212074355596	9.17688247272306e-33	5.40898110711225e-30	ENSMUSG00000069206
Sulf2	61.8041727387165	4.71603993206504	0.400562400897539	11.7735461977905	5.34303033190254e-32	3.044280582107e-29	ENSMUSG00000006800
Mdm2	3567.85990840344	0.866028221479711	0.074549984007837	11.6167459055212	3.38796157186083e-31	1.86807829509088e-28	ENSMUSG00000020184
Hmgcll1	74.4806609403756	2.12524421799689	0.188313673451512	11.2856606694793	1.54476545837646e-29	8.25146124375904e-27	ENSMUSG00000007908
Nectin4	51.0088934748313	3.4008888670763	0.302797352795879	11.2315673689819	2.85370835427773e-29	1.47813445150513e-26	ENSMUSG00000006411
Zfp750	47.9213793526148	6.16896877399218	0.550295576583201	11.2102823219032	3.63033578213668e-29	1.8250979271783e-26	ENSMUSG00000039238
Fas	971.152447456043	1.24815700059407	0.112837517123397	11.0615425827662	1.92753598758531e-28	9.41353503879877e-26	ENSMUSG00000024778
Epha2	228.493137945997	2.22445419676188	0.20117267543105	11.0574370599564	2.01781021306504e-28	9.58067499220019e-26	ENSMUSG00000006445
Trim7	142.735492111691	2.29768647842024	0.207974050153387	11.0479479373779	2.24282951851428e-28	1.03612662053958e-25	ENSMUSG00000040350
Mxd4	302.635738050483	1.37614380621996	0.125920822409647	10.9286437293355	8.40959104656722e-28	3.78276683576246e-25	ENSMUSG00000037235
ENSMUSG00000000308	32.61101241297	4.5596856479691	0.424777431322134	10.7342935658727	7.02542273318191e-27	3.07911668662252e-24	ENSMUSG00000000308
9230114K14Rik	174.155315268835	1.82872608115919	0.173353639836437	10.549106917424	5.12822139978523e-26	2.19141720966322e-23	ENSMUSG00000097145
Fos	40.8350340267464	2.34189741530136	0.227147367178058	10.310035482232	6.34778807938153e-25	2.64640833270411e-22	ENSMUSG00000021250
Zfp385a	149.28480379761	1.70949648867532	0.165887242787836	10.3051715125659	6.67724634828747e-25	2.71748028169709e-22	ENSMUSG00000000552
Zbtb10	269.779345021267	1.28822943212868	0.127371191631118	10.1139780167838	4.78989764473599e-24	1.9040400102668e-21	ENSMUSG00000069114
Tubb6	326.542173292946	1.09236530178044	0.10987198406722	9.94216415635239	2.72834247578639e-23	1.05989904405947e-20	ENSMUSG00000001473
Pde7b	75.6263561907078	1.85615976877963	0.188019409350257	9.87217104443637	5.49619237267864e-23	2.08769813835991e-20	ENSMUSG00000019990
P2rx7	28.9296698507743	3.40244092227867	0.348292631468013	9.76891445546169	1.5308346561439e-22	5.68838190814515e-20	ENSMUSG00000029468
Crip2	42.2704296129062	3.08262129263565	0.315684139941885	9.76489123971557	1.59282820046601e-22	5.79281115543949e-20	ENSMUSG00000006356
Tnip3	133.101939172769	1.51094648164609	0.1550706433648	9.74360103795802	1.96466169935008e-22	6.99624217228978e-20	ENSMUSG00000044162
Tnfrsf26	286.217860757461	0.998208293901995	0.102712301245654	9.71848826086183	2.51487343330316e-22	8.77280236641854e-20	ENSMUSG00000045362
Dennd2c	46.4110086118989	2.33484516798778	0.241494292160525	9.66832444402358	4.1105263411673e-22	1.40522453499145e-19	ENSMUSG00000007379
Atg9b	47.6147260868996	2.17227462253478	0.227068479334646	9.56660576095795	1.10473025343091e-21	3.70257925919501e-19	ENSMUSG00000038295
Tnfsf8	104.747948989923	2.9221739835124	0.308356759382442	9.4766010298096	2.62700762737887e-21	8.63527718745903e-19	ENSMUSG00000028362
Acot1	67.9149402363995	2.63028142278177	0.279159622077116	9.42214136561329	4.41980649967161e-21	1.42542929243183e-18	ENSMUSG00000072949
ENSMUSG00000040533	23.6333251566743	4.50427830374292	0.479000364083966	9.40349661812228	5.27792988413691e-21	1.67066028721393e-18	ENSMUSG00000040533
Aen	3361.28769993409	0.438608885248517	0.0483333902120228	9.07465591228928	1.1403724316659e-19	3.5440701771755e-17	ENSMUSG00000030609
ENSMUSG00000046818	21.9252352136064	4.52803956468842	0.501655706509725	9.02618968733018	1.77753301070498e-19	5.42560209856791e-17	ENSMUSG00000046818
Ptpn14	26.1579423784554	2.79463369386097	0.310487795731403	9.00078435378683	2.24110763925482e-19	6.72057068031275e-17	ENSMUSG00000026604
Ercc5	1060.00966311064	1.33547559306257	0.148728223323404	8.97930173050366	2.72490553371687e-19	8.03048453238318e-17	ENSMUSG00000026048
5830418P13Rik	82.7653544190316	1.24066482069392	0.139096540294979	8.91945132540951	4.6860397240524e-19	1.35760130513945e-16	ENSMUSG00000086236
Rnf169	657.792236785917	1.13357338814041	0.128863651168043	8.79668842117612	1.40912866046999e-18	4.01437269890226e-16	ENSMUSG00000058761
Mcam	29.0643525185923	3.70723228395603	0.426523036058345	8.69175160670316	3.56893709806907e-18	1.00006298061139e-15	ENSMUSG00000032135
Lrrc28	181.337155493826	0.944968433052845	0.109978990966083	8.59226316546469	8.5272805151745e-18	2.35091622332061e-15	ENSMUSG00000030556
Fosl2	63.8359927779331	1.64008148400304	0.191288967989151	8.57384250249106	1.0008828206346e-17	2.71556984969957e-15	ENSMUSG00000029135
Rhod	20.5303552949471	3.88314492820712	0.456738515610352	8.50189943586863	1.86513359095416e-17	4.98136382346553e-15	ENSMUSG00000041845
Dcun1d3	125.955532943793	1.02231685185287	0.120440717859594	8.48813316643171	2.09982875018642e-17	5.52190351183639e-15	ENSMUSG00000048787
Rap2a	202.68298841001	1.36554364810204	0.160920480658361	8.48582879267633	2.14186602919212e-17	5.54710849045166e-15	ENSMUSG00000051615
Zfp958	581.443324994456	0.787205446491443	0.0934868606193914	8.42049290430615	3.74903628132176e-17	9.56451897860192e-15	ENSMUSG00000058748
Arhgap23	31.4435874809203	2.49259257629456	0.298559096011273	8.34874103517664	6.89944251516901e-17	1.73429663105565e-14	ENSMUSG00000049807
Dcxr	171.710014811155	1.90988985613219	0.229284310261492	8.32978869750842	8.09867719729571e-17	2.00624187439675e-14	ENSMUSG00000039450
Carhsp1	703.495746109332	0.75652086254902	0.0929873741990034	8.1357374489356	4.09438286101831e-16	9.99789803476943e-14	ENSMUSG00000008393
Dab2ip	32.4987488522132	1.8586757145832	0.2299733871771	8.08213392600881	6.36431550531594e-16	1.51090617961619e-13	ENSMUSG00000026883
Pde3b	1985.82754251189	0.474751491498177	0.0587344530467953	8.08301545125363	6.3184614436658e-16	1.51090617961619e-13	ENSMUSG00000030671
Cd55	769.492871366623	1.0987851331863	0.13746255333995	7.99334150638802	1.31329683440858e-15	3.07509353295149e-13	ENSMUSG00000026399
Map3k20	708.089938595626	0.677704689110234	0.0859329320364488	7.88643740007361	3.109354171476e-15	7.18218795311342e-13	ENSMUSG00000004085
Ifit3	210.723599070121	1.43294181060004	0.18180255177872	7.88185752389291	3.22549690025244e-15	7.351122468802e-13	ENSMUSG00000074896
ENSMUSG00000020176	24.0108714126315	3.08827770779262	0.392254692596897	7.87314407215086	3.45838003953876e-15	7.77816973892578e-13	ENSMUSG00000020176
Ephx1	228.146686775035	1.73280129362538	0.222155552308069	7.79994591907591	6.19337115717522e-15	1.37484796350125e-12	ENSMUSG00000038776
Eng	52.1678974226783	2.9478656212147	0.378423408645794	7.78986065308111	6.70831364555118e-15	1.47006673260777e-12	ENSMUSG00000026814
Micall2	16.5411611208593	5.02363296291463	0.652549957229976	7.69846493322834	1.37710513400151e-14	2.97960228550479e-12	ENSMUSG00000036718
Ighg3	588.36270287942	-0.988886771970688	0.129141522890551	-7.65738818806388	1.89752424356773e-14	4.05429773691291e-12	ENSMUSG00000076615
Rbl2	963.981853297229	0.784284697629327	0.102824282796943	7.62742687131724	2.39485574338569e-14	5.05373694094958e-12	ENSMUSG00000031666
Bcl2l11	1552.45248915087	0.539916309206242	0.0711880211601673	7.58437024104764	3.34105846263545e-14	6.964477109979e-12	ENSMUSG00000027381
Ighg2b	226.209625371406	-1.05922903948974	0.139806306029035	-7.57640388030676	3.55264689283171e-14	7.3163124505027e-12	ENSMUSG00000076613
Asap3	22.0598798556831	2.18885414723218	0.289327449439822	7.56531795192649	3.86917036657449e-14	7.87330108045925e-12	ENSMUSG00000036995
ENSMUSG00000089809	90.645779772058	1.78535645092538	0.238003232076536	7.50139582285692	6.31418023777441e-14	1.26974450357974e-11	ENSMUSG00000089809
Gna15	496.953390726885	0.663239821271604	0.0888237374245579	7.46692089864969	8.20930823881446e-14	1.63164774100065e-11	ENSMUSG00000034792
9530053A07Rik	18.138536000279	3.59347140258473	0.483080730448853	7.43865605909361	1.01714765333799e-13	1.99840285500073e-11	ENSMUSG00000078776
ENSMUSG00000106464	65.3727626781339	2.14929292693161	0.289412053711357	7.42641123398126	1.11583718769878e-13	2.16738693742445e-11	ENSMUSG00000106464
Mus81	223.110146529498	-1.90418333378986	0.257373652126364	-7.39851697350494	1.37713792347376e-13	2.64487848606033e-11	ENSMUSG00000024906
Hpcal1	82.2297052826262	1.5296298884355	0.207107742683614	7.38567215602472	1.51685129700968e-13	2.88083769108738e-11	ENSMUSG00000071379
Gtse1	1502.06501328978	0.899516634189981	0.121955145350701	7.37579895955422	1.63362372907111e-13	3.0685198242871e-11	ENSMUSG00000022385
ENSMUSG00000034394	33.0520670410775	2.11984140284064	0.288116857174353	7.35757506044788	1.87281104038844e-13	3.47956077319127e-11	ENSMUSG00000034394
Plekha7	43.4519204859181	2.39140499835395	0.325402279254105	7.34907267347846	1.99586656892936e-13	3.66831690996878e-11	ENSMUSG00000045659
Gm9949	17.5202965587696	3.138922912955	0.428036235345646	7.33331118665753	2.24534743704059e-13	4.08294933418456e-11	ENSMUSG00000054589
Jag2	49.7870874322183	1.74625988703548	0.239345120377162	7.29599117911286	2.96468328596552e-13	5.33424541126406e-11	ENSMUSG00000002799
Tnfrsf18	72.407842978026	1.43956051024295	0.198939890071297	7.23615816680622	4.61572998673048e-13	8.218403402415e-11	ENSMUSG00000041954
Ccl22	2652.22428107835	0.726249706582596	0.101045564929812	7.18734866876209	6.60615573681014e-13	1.16411360834325e-10	ENSMUSG00000031779
Fam107b	6050.14491839309	0.358623467325996	0.0501738207019222	7.14762125564532	8.82945180852534e-13	1.54001856901147e-10	ENSMUSG00000026655
Glipr1	546.822797903855	1.28648956975617	0.181774802195531	7.07738121135362	1.46904019861703e-12	2.53639435504655e-10	ENSMUSG00000056888
ENSMUSG00000118559	17.6508250402759	2.84562193420093	0.403120192083857	7.05899131346163	1.67715555340146e-12	2.86676198742911e-10	ENSMUSG00000118559
Ifit3b	45.0227661931636	1.62392741104842	0.2301433189902	7.05615708582689	1.71170317708819e-12	2.89684578276915e-10	ENSMUSG00000062488
Bmt2	653.971046459493	0.651269196620311	0.0924800876625627	7.04226404927982	1.89140954974075e-12	3.16959445428614e-10	ENSMUSG00000042742
Mfge8	160.563863060098	1.15816522973957	0.165263716790751	7.00798246723436	2.41779095607671e-12	4.01235930215721e-10	ENSMUSG00000030605
Qpctl	221.142695740463	0.958095672640041	0.137842106638421	6.95067491353176	3.63542738718291e-12	5.97503464703052e-10	ENSMUSG00000030407
ENSMUSG00000055202	58.4200113807313	1.97950014189271	0.285072201020759	6.94385539805253	3.81541053090935e-12	6.2111249718889e-10	ENSMUSG00000055202
Parp11	626.863024434081	0.476553610942794	0.0688441444791459	6.92220979065475	4.44652072866332e-12	7.17022441651341e-10	ENSMUSG00000037997
Ivns1abp	7455.89563786743	-0.322334415874142	0.046883071787847	-6.87528362759066	6.18666435998604e-12	9.88305176684499e-10	ENSMUSG00000023150
Mx2	982.75975072488	0.816383181947603	0.11902861257164	6.85871375217657	6.94833065886159e-12	1.09970199955483e-09	ENSMUSG00000023341
Steap4	36.6915504869404	1.75069023430332	0.255734381062418	6.84573668597195	7.60833117673006e-12	1.19311197067749e-09	ENSMUSG00000012428
ENSMUSG00000026831	13.6988836551138	5.75906093715669	0.846114837305617	6.80647671360539	1.00017910678412e-11	1.55418740656917e-09	ENSMUSG00000026831
Tmem64	450.737879054859	-0.455227139754097	0.0669846791152099	-6.79598895996996	1.0757201615418e-11	1.65651213704811e-09	ENSMUSG00000043252
Lrp8	395.121727177854	-0.598331363903056	0.088825942961927	-6.73599788475666	1.62808654794557e-11	2.48472172893157e-09	ENSMUSG00000028613
H2-T-ps	384.065132093302	1.08083403812166	0.161097828560065	6.70917819180086	1.95723544860176e-11	2.96062172769468e-09	ENSMUSG00000073405
Tbc1d8	26.6921619333642	1.83437291182072	0.273830272318407	6.69894126858161	2.09934940096885e-11	3.1477350272597e-09	ENSMUSG00000003134
Akr1b10	162.339761325403	1.05668092848217	0.158223433854744	6.6784097825373	2.41548847895064e-11	3.59025604962638e-09	ENSMUSG00000061758
Abhd4	165.64448309163	1.26679415043896	0.189937162235523	6.66954341914475	2.56600459720381e-11	3.78109625689695e-09	ENSMUSG00000040997
Dcaf4	296.656475027204	0.651369136363756	0.0980259449440928	6.64486465022349	3.03495837556796e-11	4.43389260799856e-09	ENSMUSG00000021222
Ccdc122	229.457525129586	1.19251400985403	0.180635130488047	6.60178342181862	4.06240708960145e-11	5.88463765953877e-09	ENSMUSG00000034795
Usp18	1026.65161844204	0.819084481692124	0.124382022759206	6.58523204175419	4.5417550773583e-11	6.52371592750298e-09	ENSMUSG00000030107
Inpp1	401.421275309104	0.551823250100462	0.0842334809416624	6.55111535141992	5.71089227969663e-11	8.00133456859463e-09	ENSMUSG00000026102
ENSMUSG00000110697	60.9473707556315	1.16804795996813	0.178275073630549	6.55194209813515	5.67935644059979e-11	8.00133456859463e-09	ENSMUSG00000110697
Tsc22d1	48.8138066504007	1.36977493690509	0.209072537004719	6.5516731969162	5.689594805088e-11	8.00133456859463e-09	ENSMUSG00000022010
Lcp2	991.158199368533	0.552247497584916	0.0843512118677142	6.54700134541032	5.87038349400298e-11	8.15792398886121e-09	ENSMUSG00000002699
Lxn	135.536777982429	0.771229591586153	0.120088454686611	6.42217933105055	1.34337027883931e-10	1.85179259485486e-08	ENSMUSG00000047557
ENSMUSG00000034457	13.0239873624182	3.90217133028934	0.609417508749192	6.40311654041317	1.5223689742009e-10	2.08174823008128e-08	ENSMUSG00000034457
Snx20	2289.16008077101	0.571725637672283	0.08995599022864	6.3556149648193	2.07594420549084e-10	2.81619954797261e-08	ENSMUSG00000031662
Nr3c1	1133.01160732801	0.3813035646489	0.0604207299333044	6.310806987433	2.77584207965687e-10	3.73602115492715e-08	ENSMUSG00000024431
Clgn	31.39182862748	2.35878513547779	0.377530177873702	6.24793797614475	4.15906756974158e-10	5.55221649690578e-08	ENSMUSG00000002190
Rsad2	191.175082259076	1.21860264854976	0.195077188074563	6.24677165268542	4.19022949804508e-10	5.55221649690578e-08	ENSMUSG00000020641
Ifrd2	1313.60942824759	-0.55555914767244	0.0891369513606489	-6.23264694598588	4.5861899486444e-10	5.98410265589151e-08	ENSMUSG00000010048
Gria3	9.28828509807556	3.70309518317431	0.594110337025339	6.23300917758039	4.5755935366527e-10	5.98410265589151e-08	ENSMUSG00000001986
Exoc4	1049.5441543377	1.11237313362505	0.179391542124071	6.2008114789253	5.6172768324467e-10	7.27394794674329e-08	ENSMUSG00000029763
Gm24187	667.003295175417	2.70531472247919	0.438195183434487	6.17376645100356	6.6682021653765e-10	8.56989320396846e-08	ENSMUSG00000088609
Slc25a36	1258.44789737806	0.639034320843705	0.103539822018343	6.1718699953965	6.74869831908031e-10	8.60861943045073e-08	ENSMUSG00000032449
Col23a1	17.1292553536931	1.91510694758277	0.310893760372469	6.16000445067908	7.27428998395253e-10	9.21032879227412e-08	ENSMUSG00000063564
Gm10505	115.889588293528	0.988432791884785	0.160664924856182	6.15213801499968	7.64453065556496e-10	9.60793841879205e-08	ENSMUSG00000073430
Rarg	11.119542233934	3.65872171150499	0.598103024532282	6.11720984752772	9.52279319389672e-10	1.1881248471772e-07	ENSMUSG00000001288
Acad8	118.647511287632	0.989650233421756	0.161900185124384	6.11271835582791	9.79481495272502e-10	1.2132084926589e-07	ENSMUSG00000031969
Scn1b	6.63847167071012	5.69467178930441	0.932934429892446	6.10404290681063	1.03418503788232e-09	1.27174998939011e-07	ENSMUSG00000019194
Sesn2	894.037145818501	1.21996425636102	0.200641051616258	6.08033224773112	1.19933769767578e-09	1.46430566188373e-07	ENSMUSG00000028893
Fancb	460.95730196523	-0.463896357467152	0.0763229015956891	-6.07807548938043	1.21633494998822e-09	1.47452576596799e-07	ENSMUSG00000047757
Tpst2	505.468351898463	-0.522722727828508	0.0860364864469249	-6.07559361633127	1.23529886855248e-09	1.48696926480053e-07	ENSMUSG00000029344
Tfrc	7544.74527819984	-0.344911999757299	0.0570369149694488	-6.0471713791331	1.47410930601782e-09	1.76202450124214e-07	ENSMUSG00000022797
Gm15675	55.6297842398034	1.15442365043636	0.191332420076188	6.03360188501599	1.60344814033984e-09	1.90331521269645e-07	ENSMUSG00000086825
Tmem255a	11.9890093256373	2.34584724444764	0.390515980757784	6.00704544765517	1.88934569590059e-09	2.22721282620888e-07	ENSMUSG00000036502
ENSMUSG00000029875	8.69235169180985	5.57714177366232	0.92876816082116	6.00488045233092	1.91472931521721e-09	2.24167590308272e-07	ENSMUSG00000029875
Tmem63b	405.218499189814	0.721510897586869	0.120619764242234	5.98169712998196	2.20824592571982e-09	2.5677243270972e-07	ENSMUSG00000036026
Ldhb	11.2396210251197	5.02647874848473	0.842140244705102	5.96869557070615	2.39157861519887e-09	2.76211170740502e-07	ENSMUSG00000030246
Sqstm1	3490.9917203352	0.336225355547895	0.056404625339643	5.96095361902147	2.50770143571139e-09	2.87678796245737e-07	ENSMUSG00000015837
Sytl1	20.2896379333542	2.02583248170066	0.340302272166744	5.95303836439864	2.63209565946222e-09	2.99936074047919e-07	ENSMUSG00000028860
Parp10	965.069142668555	0.609346899956666	0.102446046631895	5.94797866769957	2.71473963480718e-09	3.07304930978537e-07	ENSMUSG00000063268
Adamts14	15.8532023401017	2.11418514769711	0.355942021882283	5.93968966214478	2.85562132687965e-09	3.21125890397065e-07	ENSMUSG00000059901
ENSMUSG00000026114	6.10513278333922	5.5623000455972	0.9367243331612	5.93803304631352	2.88461907500957e-09	3.22266626464958e-07	ENSMUSG00000026114
Lrp1	10.8543231104845	2.65875185963916	0.44947817878537	5.91519674397528	3.31479113692745e-09	3.67920291581175e-07	ENSMUSG00000040249
Csnk1g1	827.683071814488	0.627849031281142	0.106342807935667	5.90401028023412	3.54770040554561e-09	3.91231245367684e-07	ENSMUSG00000032384
Psat1	6312.11616551009	-0.291636148799646	0.0498244350232973	-5.85327557980898	4.81984490588701e-09	5.28112878053376e-07	ENSMUSG00000024640
ENSMUSG00000019851	49.8260154395925	2.43905075272707	0.416838177094528	5.8513132595673	4.87706656036568e-09	5.30978972715481e-07	ENSMUSG00000019851
Gpr171	742.520587857699	0.573153338249374	0.0979759991064337	5.84993614228668	4.91761773719229e-09	5.32005316340682e-07	ENSMUSG00000050075
Ulbp1	730.679323350174	1.09282114655415	0.18693246725976	5.84607458818575	5.03308435383076e-09	5.37690692875183e-07	ENSMUSG00000079685
Thrb	28.7226808972541	1.69462942509816	0.28983740301625	5.84682793684549	5.01035284637752e-09	5.37690692875183e-07	ENSMUSG00000021779
Ddit3	1157.94448122742	0.963699691976807	0.164952623238442	5.84228169917468	5.14906383288575e-09	5.46664273885194e-07	ENSMUSG00000025408
Mogs	2007.57111647155	-0.459001469455927	0.0786095781159605	-5.83900181704109	5.25144970549324e-09	5.5409277664195e-07	ENSMUSG00000030036
Scarb2	700.671303739998	0.457148470616056	0.0786471579038248	5.81265086749974	6.14912222814036e-09	6.4482789107732e-07	ENSMUSG00000029426
Gask1b	9.38509340475805	3.36570877988405	0.579359250060331	5.80936401642602	6.27106056423554e-09	6.53605111124867e-07	ENSMUSG00000027955
Fbxl20	240.317781534578	1.13896360810189	0.19641620281246	5.79872531793819	6.68208782160499e-09	6.92223800816328e-07	ENSMUSG00000020883
Bsdc1	721.789707329198	0.389202244736531	0.0674915866360078	5.76667795403236	8.08493344863099e-09	8.32504623117165e-07	ENSMUSG00000040859
Apold1	36.2498056817624	1.55273520971254	0.269344734824055	5.76486193697768	8.1724714547144e-09	8.36479368715169e-07	ENSMUSG00000090698
Bbs7	116.317995245375	0.778488501743361	0.135569658656439	5.74235053372974	9.33712844196105e-09	9.49997240824049e-07	ENSMUSG00000037325
ENSMUSG00000116530	47.9016814822933	1.31225887638162	0.228579982470723	5.74091774002871	9.41648270049194e-09	9.52402004730821e-07	ENSMUSG00000116530
Dstn	1685.31697972363	0.538373530110128	0.0938454092831022	5.73681263924188	9.64748793484219e-09	9.70026536883868e-07	ENSMUSG00000015932
Zfp219	489.219800486706	0.610460972582811	0.106554530553519	5.72909447783826	1.00968152019033e-08	1.00926820026978e-06	ENSMUSG00000049295
Fam131a	11.0703856140522	2.4155833481926	0.424001648002547	5.69710839467796	1.21856459262144e-08	1.21098398730688e-06	ENSMUSG00000050821
Ppp1r36	5.42238796173047	5.38963312786704	0.952293512994454	5.65963440296839	1.5169580726719e-08	1.49880718706248e-06	ENSMUSG00000052221
Tmem127	1058.30110414894	0.300865869944864	0.0532802538408865	5.64685504020598	1.63409501437074e-08	1.60526356785282e-06	ENSMUSG00000034850
Prpf19	4869.02317841599	-0.248952334047448	0.0442118225697702	-5.63089960054416	1.79272068246194e-08	1.75102712144697e-06	ENSMUSG00000024735
Pidd1	380.687121993755	0.911042845065526	0.162028831699739	5.6227205708291	1.87973324535323e-08	1.81573713593454e-06	ENSMUSG00000025507
Slc35e4	16.8494529835017	1.84542672626264	0.328211456396207	5.62267614459776	1.88021689030839e-08	1.81573713593454e-06	ENSMUSG00000048807
Fam174b	32.574451036127	1.36637698244216	0.243889770066537	5.60243663385055	2.11359314579976e-08	2.0296431259076e-06	ENSMUSG00000078670
Mxd1	232.755126211589	0.706065495318801	0.126699813904186	5.57274295487715	2.5075942462406e-08	2.39454237156372e-06	ENSMUSG00000001156
Tbxa2r	30.498371819115	1.27756711432472	0.229645063866505	5.56322479923793	2.64834371724813e-08	2.51489661994013e-06	ENSMUSG00000034881
Uaca	32.91923146939	1.12542239940455	0.203804932101407	5.52205674220177	3.35054241861189e-08	3.16413378791895e-06	ENSMUSG00000034485
Ifitm3	151.402562720344	1.10013715188674	0.199279145926701	5.52058343471318	3.37875912320426e-08	3.16486955899061e-06	ENSMUSG00000025492
Slc37a2	280.609432818931	0.454750156771365	0.0823810027617382	5.52008523235132	3.38835271336385e-08	3.16486955899061e-06	ENSMUSG00000032122
Rin2	8.60267106024623	3.09235799276874	0.561651717753519	5.50582842537628	3.67436257183073e-08	3.41336301305993e-06	ENSMUSG00000001768
ENSMUSG00000028364	12.7954418208894	2.07776029576289	0.37800648096742	5.49662611721721	3.87126262139163e-08	3.57683740472687e-06	ENSMUSG00000028364
Brdt	42.3574747617422	1.04493392652971	0.190393526343615	5.48828495693625	4.05854965130032e-08	3.72971984890733e-06	ENSMUSG00000029279
ENSMUSG00000023064	4.80494025392103	5.19662665804456	0.951844090935983	5.45953555580151	4.77381730328729e-08	4.36357535642191e-06	ENSMUSG00000023064
Ptgs2	29.2168108869093	1.91704485120845	0.351276692178749	5.45736421997777	4.83254432893414e-08	4.39375958587613e-06	ENSMUSG00000032487
Homer3	91.3930591201821	1.00215380006213	0.184481926415954	5.43226005675246	5.56447482543642e-08	5.01575688620057e-06	ENSMUSG00000003573
Gm16712	783.871726008477	0.799290665206122	0.147147207665668	5.43191187849233	5.5753455120699e-08	5.01575688620057e-06	ENSMUSG00000097077
Cflar	6314.01415573521	0.231750863246678	0.0427128696902962	5.42578536462345	5.77002628004173e-08	5.16372037721221e-06	ENSMUSG00000026031
Sp100	8945.51239864479	0.260703453608476	0.0481278890177411	5.41688943623466	6.06448154452483e-08	5.39896786669599e-06	ENSMUSG00000026222
Smox	43.1197654706953	1.52563783384563	0.282363576567937	5.40309714301471	6.54999631591824e-08	5.80098896518086e-06	ENSMUSG00000027333
Itm2b	5517.02877581671	0.395553056448251	0.0735918940076656	5.3749541546933	7.66021701976479e-08	6.74928296488864e-06	ENSMUSG00000022108
Neil1	268.126301104257	0.610565022016987	0.114001314594607	5.35577176621322	8.51919914870932e-08	7.46762415635325e-06	ENSMUSG00000032298
Aldh2	1642.56154549326	0.320772639463062	0.0600823572873487	5.33888239319474	9.35212822095338e-08	8.1559146775896e-06	ENSMUSG00000029455
Gpr107	546.073489705651	0.367558052535088	0.0688786813813139	5.33631081728001	9.48567437124525e-08	8.23038741257335e-06	ENSMUSG00000000194
Ccne2	959.976678890835	-0.534134425692519	0.100134444434417	-5.33417275852918	9.59811107684264e-08	8.28588447658945e-06	ENSMUSG00000028212
Ptp4a3	3678.1926436837	0.491021241468415	0.0922916565338472	5.32032103344399	1.03584302444124e-07	8.89731900340408e-06	ENSMUSG00000059895
Rnf126	2245.89676948631	-0.422062447579684	0.0795851865831522	-5.30327898570301	1.13740890194837e-07	9.72086518050172e-06	ENSMUSG00000035890
Slc2a9	144.418256788034	0.855918887457985	0.161432748020756	5.30201522275973	1.14531288392499e-07	9.7397179726019e-06	ENSMUSG00000005107
Me2	2842.34777793062	-0.265543314014516	0.0501095965496812	-5.29925068846329	1.16278891439727e-07	9.83938164049138e-06	ENSMUSG00000024556
Kdr	31.4539885990923	1.25989356574387	0.237820729936217	5.29766083083578	1.17295578954398e-07	9.87651887225383e-06	ENSMUSG00000062960
Pdcl	1677.8097949122	0.673513341574573	0.127286805961124	5.29130522593422	1.21446484512304e-07	1.01759056851412e-05	ENSMUSG00000009030
Lfng	510.004250435206	-0.39974438329408	0.0755721145925302	-5.28957520177148	1.22600767219316e-07	1.02225117759988e-05	ENSMUSG00000029570
Ago4	71.8737557149682	0.937852811790133	0.177728330968544	5.27688977148005	1.3139486690192e-07	1.09025847570608e-05	ENSMUSG00000042500
Tor3a	3320.94939470175	0.306772864591488	0.0581919440652816	5.27174112360535	1.35135598617549e-07	1.11588057351196e-05	ENSMUSG00000060519
Glipr2	1651.35514712829	0.555068395597696	0.105379024832136	5.26735179493161	1.38405817908276e-07	1.13738973341642e-05	ENSMUSG00000028480
Prrg4	77.708361930019	2.94377709274758	0.561036702247846	5.24703122086856	1.54569713145955e-07	1.26414359177215e-05	ENSMUSG00000027171
Mfsd2a	501.031498079898	-0.502385031186662	0.0959385919702641	-5.23652704161402	1.63626278024078e-07	1.33183998584074e-05	ENSMUSG00000028655
Rgs2	57.9488064656728	1.33063114395096	0.254162302724045	5.23535996365156	1.64663630405494e-07	1.33393148555503e-05	ENSMUSG00000026360
Bmp1	30.8459356557365	1.36157331036052	0.260119324290771	5.23441814280013	1.6550539766231e-07	1.33442630294427e-05	ENSMUSG00000022098
Ighg2c	21.5130131762073	-1.67462682437346	0.320840526486148	-5.21949905367007	1.79407731733486e-07	1.43972598991572e-05	ENSMUSG00000076612
Dact3	132.71278285564	1.19141241556444	0.228841303791751	5.20628223936637	1.92661542144494e-07	1.53886156068964e-05	ENSMUSG00000078794
Wdr4	715.817738585772	-0.379801597767025	0.0729857609589824	-5.20377663775365	1.95278700607182e-07	1.5525110834784e-05	ENSMUSG00000024037
Rfc5	1929.47241811391	-0.297751804020928	0.0573127333679797	-5.19521206760801	2.0448660193898e-07	1.61818957728842e-05	ENSMUSG00000029363
Mdm4	3210.16006139844	0.524845193037377	0.101094296548277	5.19163999312997	2.08449765399788e-07	1.64050421968918e-05	ENSMUSG00000054387
Jaml	72.7135200955948	0.9850272325087	0.189758636511491	5.19094809394381	2.0922595208111e-07	1.64050421968918e-05	ENSMUSG00000048534
Paics	5928.58513403658	-0.283221022960242	0.0548108104019566	-5.16724749886441	2.37566587801825e-07	1.84883073771265e-05	ENSMUSG00000029247
Phf11d	157.528817649062	0.81838849742144	0.158389420049158	5.16693916277642	2.3795867448475e-07	1.84883073771265e-05	ENSMUSG00000068245
Tcn2	71.0285617626079	1.15661853449078	0.223979687221333	5.16394387740986	2.4180022192626e-07	1.8701770105817e-05	ENSMUSG00000020432
Bhlhe41	244.874881197935	0.761980108384618	0.148083756590215	5.14560223166954	2.66663929080246e-07	2.05319213503092e-05	ENSMUSG00000030256
Emb	731.379672138073	-0.516720686078188	0.100464288741783	-5.14332697269459	2.69915247422123e-07	2.06890642340195e-05	ENSMUSG00000021728
Hic1	56.7229834275742	1.42305174940255	0.277027188687179	5.13686673191301	2.79356910839892e-07	2.1317177129403e-05	ENSMUSG00000043099
Ccr7	555.607711837604	0.725794673043814	0.141630031414824	5.12458174155178	2.98198960808069e-07	2.26538437204103e-05	ENSMUSG00000037944
Myo10	83.1861396704338	0.903743112269017	0.176601273649522	5.11742125972749	3.09741302744148e-07	2.34265844593173e-05	ENSMUSG00000022272
Nr4a3	83.4478749439371	1.22524387628976	0.240126682112518	5.10248950891528	3.35214334997746e-07	2.51498693242869e-05	ENSMUSG00000028341
Spsb1	447.059079735089	0.450280189758716	0.0882496405419821	5.10234587918246	3.35468917447927e-07	2.51498693242869e-05	ENSMUSG00000039911
Ube2l6	577.82966761743	0.54922382025116	0.107846053209969	5.09266499703847	3.53065222663146e-07	2.6353466598171e-05	ENSMUSG00000027078
Cast	1655.83298703939	0.41971301926547	0.0826360575988434	5.07905424654896	3.79318400556219e-07	2.81899540030759e-05	ENSMUSG00000021585
Dlgap4	557.142747400068	0.418182638873833	0.0824226878918256	5.07363505813679	3.90287235492547e-07	2.87550849839401e-05	ENSMUSG00000061689
Lef1	805.063094810926	0.699741656469927	0.137902647707072	5.07417129478394	3.89188353744249e-07	2.87550849839401e-05	ENSMUSG00000027985
Aga	201.826752610291	0.777869898680082	0.153547232844774	5.0659975062296	4.06267233228298e-07	2.98039734659713e-05	ENSMUSG00000031521
St14	780.827620332098	0.496431901580707	0.0981948222880927	5.05558124158757	4.2908191838677e-07	3.13431505597652e-05	ENSMUSG00000031995
Sh3bgrl2	44.0707637778615	1.04840751198013	0.207646912923174	5.04899156563922	4.44148344040864e-07	3.23056495518744e-05	ENSMUSG00000032261
Myb	564.579906292503	0.581785594444948	0.115407948800685	5.04112238793636	4.62809346540344e-07	3.35203396627716e-05	ENSMUSG00000019982
Tifa	31.7852680965026	1.28537141178599	0.25564830842578	5.0278893676277	4.95907826689609e-07	3.57660442261835e-05	ENSMUSG00000046688
Xylb	139.516046235431	-0.70315706491611	0.140339768793799	-5.01039064664028	5.43196576496031e-07	3.90120129497759e-05	ENSMUSG00000035769
Trim6	52.2094265166617	0.862318899797443	0.172190751022701	5.00792809530031	5.50190798871479e-07	3.91850471879591e-05	ENSMUSG00000072244
Calcoco1	203.591081956173	1.28090132664396	0.255755283928763	5.00830836011478	5.49105117404178e-07	3.91850471879591e-05	ENSMUSG00000023055
Cecr2	203.513203414806	1.07151629494346	0.21449235529245	4.99559200365205	5.86555514008398e-07	4.16016323690687e-05	ENSMUSG00000071226
Isyna1	2079.56404023324	-0.493504932693811	0.0988150043330953	-4.99423074485992	5.90707393371015e-07	4.17229813012015e-05	ENSMUSG00000019139
Irf7	1961.00169231882	0.801069730653586	0.160649422934155	4.98644636266088	6.14999696609298e-07	4.32600403874186e-05	ENSMUSG00000025498
Supv3l1	1553.13892979504	-0.236143707591145	0.0474203587625147	-4.97979588838146	6.36513682273093e-07	4.4589870373336e-05	ENSMUSG00000020079
Klhl26	308.412946265591	0.630073780833573	0.127042892303735	4.95953586547124	7.06618016808673e-07	4.92988643318802e-05	ENSMUSG00000055707
Zbp1	3714.84038226055	0.45893080181539	0.0925616444391392	4.95810985852941	7.11823108436612e-07	4.94601316768578e-05	ENSMUSG00000027514
Ndc1	1477.63215921991	-0.304756922476941	0.061500586136171	-4.95534988564444	7.2200246729867e-07	4.99643245892152e-05	ENSMUSG00000028614
Ahnak2	8.39212223584796	5.04388646858686	1.01823515796945	4.95355756389839	7.28687882685819e-07	5.02236370110835e-05	ENSMUSG00000072812
Pmaip1	2484.3588286832	0.714863752758638	0.144344375610543	4.95248775530693	7.32706682644145e-07	5.02978125559694e-05	ENSMUSG00000024521
ENSMUSG00000026825	5.95600972807394	3.79714846473756	0.766999863442449	4.95065077025593	7.39657290371062e-07	5.03703667900899e-05	ENSMUSG00000026825
Oas1b	204.448782238485	0.734398140352857	0.148333423635697	4.95099568494097	7.38347409985764e-07	5.03703667900899e-05	ENSMUSG00000029605
Cdkn2aipnl	2200.94641152242	-0.270954221778016	0.0547795872679575	-4.94626256405744	7.56519025977921e-07	5.1314205202542e-05	ENSMUSG00000020392
Mx1	1336.33629425202	1.34352433053105	0.271672492100651	4.94538228785154	7.59945804720678e-07	5.13428997632037e-05	ENSMUSG00000000386
Mettl6	2134.48660191004	0.39644658075065	0.0802255184240352	4.94165184019398	7.74634535066089e-07	5.21292445192309e-05	ENSMUSG00000021891
Hspa8	141542.444475346	-0.300972600628288	0.0609152224254484	-4.94084382596872	7.77851952997595e-07	5.21404840493643e-05	ENSMUSG00000015656
Orc5	515.003055123678	0.519498468234209	0.105221326352443	4.93719748878786	7.92532052333805e-07	5.29169936349286e-05	ENSMUSG00000029012
Rnase6	481.259928399757	0.539270498117669	0.109330852680841	4.93246402908712	8.11987362900607e-07	5.40050583426462e-05	ENSMUSG00000021880
Gm43549	945.459793104391	1.21565703771971	0.24652392880629	4.93119286069358	8.17289931492466e-07	5.4147041856592e-05	ENSMUSG00000106334
Fuca1	1149.39149394099	0.459382884126576	0.0932435877333936	4.92669678734441	8.36313805428152e-07	5.51934821474263e-05	ENSMUSG00000028673
Dusp14	56.5577719183327	1.02291536220474	0.20798455828429	4.91822744266686	8.73314072599673e-07	5.741368247287e-05	ENSMUSG00000018648
Apaf1	835.73519903442	0.752316111292428	0.153019403968898	4.91647524287403	8.81163354732492e-07	5.77077594729597e-05	ENSMUSG00000019979
Egr3	448.383142013596	0.597995678454766	0.121715642219413	4.91305527827539	8.96679822647687e-07	5.84998023225836e-05	ENSMUSG00000033730
Mgmt	65.5203043874113	1.64142805883586	0.334220660423391	4.9112106258078	9.0515793911655e-07	5.88283827122403e-05	ENSMUSG00000054612
Gm25911	119.69599540936	2.56341888777891	0.522603510523104	4.90509312731756	9.33830226433487e-07	6.02338115487834e-05	ENSMUSG00000088246
Pdgfa	32.5096668924531	3.04967954842287	0.62170180294121	4.90537349899122	9.32497238215407e-07	6.02338115487834e-05	ENSMUSG00000025856
Ssbp4	813.01551651432	-0.389147559751164	0.0794296340939671	-4.89927423423345	9.61913083741147e-07	6.181195616687e-05	ENSMUSG00000070003
Gm4961	19.5519264085662	1.35124496701646	0.276555692686259	4.88597777139012	1.02916810059569e-06	6.58860312489969e-05	ENSMUSG00000104667
Mybl1	229.608823675391	0.836789217448515	0.171333423873955	4.88398117850091	1.03965003182996e-06	6.63087238584684e-05	ENSMUSG00000025912
Zmynd8	4144.43060084964	0.421006317620025	0.0862768147944573	4.87971558318437	1.06238937177304e-06	6.75071432405822e-05	ENSMUSG00000039671
Zfp639	1152.30358999947	-0.258244620302583	0.0529421547831615	-4.87786379984516	1.07240931248059e-06	6.78914532527066e-05	ENSMUSG00000027667
Slc4a11	11.2706379057522	2.08171177828458	0.427782574742416	4.8662846529877	1.13715702580235e-06	7.17248156532824e-05	ENSMUSG00000074796
Ifi44	309.521210174919	1.19825131377594	0.246430748505807	4.86242614219754	1.15955650816234e-06	7.28687477721284e-05	ENSMUSG00000028037
Zfp667	228.841565748075	0.518624506404383	0.106760898847453	4.85781322565882	1.18689287411923e-06	7.43134062172893e-05	ENSMUSG00000054893
ENSMUSG00000110866	156.430319935916	1.66141020085119	0.34338817237465	4.83828604043626	1.30963574605348e-06	8.16992839682198e-05	ENSMUSG00000110866
Synpo2	10.5581577631566	2.04179492448667	0.422607245937677	4.83142431681776	1.35559749330938e-06	8.42590107386809e-05	ENSMUSG00000050315
Btg2	1791.39408296981	0.625101594044299	0.129433439781411	4.82952160662637	1.36861463842515e-06	8.47598913572503e-05	ENSMUSG00000020423
Pvt1	296.379717296963	0.905452102144678	0.18786859387895	4.81960333789527	1.43843930726642e-06	8.87626103938808e-05	ENSMUSG00000097039
Dusp16	514.830216453871	0.571209450704756	0.118768043784714	4.80945406274574	1.51343070304602e-06	9.30542122559916e-05	ENSMUSG00000030203
Gm15590	477.621296457487	-0.541094601161118	0.112571631508519	-4.80666926391814	1.53465557096803e-06	9.40210310916002e-05	ENSMUSG00000058542
Ogdhl	8.4569443868103	2.46842261493459	0.514207785295464	4.80043804376908	1.58318950523372e-06	9.66480650462858e-05	ENSMUSG00000021913
ENSMUSG00000087132	5.70350313104144	4.46345612293309	0.930671952896767	4.79594996823569	1.61905690602643e-06	9.84859063868676e-05	ENSMUSG00000087132
Dhodh	448.310731347585	-0.450931396173694	0.0942024723615797	-4.78683186193747	1.6943466525432e-06	0.000102700238765677	ENSMUSG00000031730
Tmem231	71.3038161652608	-0.878263536598871	0.183651639158849	-4.78222541667172	1.73365110780606e-06	0.000104711301716357	ENSMUSG00000031951
Gk	396.564102784796	-0.422685717491032	0.0884157750842074	-4.78065952697315	1.74721050115442e-06	0.000105158694000819	ENSMUSG00000025059
Tfdp1	8464.82897082447	-0.286809189496029	0.0600281071822436	-4.77791492950602	1.77122282705391e-06	0.000105858432807107	ENSMUSG00000038482
Acad11	183.556079792509	0.666380736492265	0.139464894783945	4.77812525886607	1.76937150382992e-06	0.000105858432807107	ENSMUSG00000090150
Smarca2	1020.87826074896	0.306725314473874	0.0644519880113521	4.75897367851322	1.94579805101759e-06	0.00011588685047402	ENSMUSG00000024921
Cubn	5.90970027607852	4.52695036064538	0.953051666932849	4.7499527231448	2.03464209711377e-06	0.000120757421409603	ENSMUSG00000026726
Resf1	1933.68429332159	0.336168892211245	0.0707884607797587	4.74892219025858	2.04503598692536e-06	0.000120954325690364	ENSMUSG00000032712
Gtf2ird1	122.926605491415	0.784431772268885	0.165308106405234	4.74527105371313	2.08227312129297e-06	0.000122732049869864	ENSMUSG00000023079
Arhgef10l	12.9680370563573	2.17833564764782	0.459251413189584	4.74323123475852	2.10335944216865e-06	0.000123548876099617	ENSMUSG00000040964
Plb1	4.08966698632676	4.96742820909358	1.04778601632545	4.7408804199489	2.12791502938903e-06	0.000124563190401872	ENSMUSG00000029134
Abca1	22.5733980463987	1.62097981172746	0.342359630360893	4.73472824473707	2.1934880141997e-06	0.000127528199410597	ENSMUSG00000015243
Selenon	39.3504524378741	1.44951928686614	0.306143550722686	4.73476995822511	2.19303694570061e-06	0.000127528199410597	ENSMUSG00000050989
Wdr35	237.306392470821	0.685272586548767	0.144778357570213	4.73325293952468	2.20949863938414e-06	0.000128023594044044	ENSMUSG00000066643
Spata6	254.079238250138	0.47266335699448	0.0999135049899119	4.7307254113666	2.23718959737818e-06	0.000129190141175626	ENSMUSG00000034401
Gne	605.986294828415	0.509122566595128	0.107684071732684	4.72792826648476	2.26822284730644e-06	0.000130541188986562	ENSMUSG00000028479
Eef2k	419.475432876966	-0.310245367961014	0.0657109300881394	-4.72136625588583	2.34265653560705e-06	0.000134372577728629	ENSMUSG00000035064
Foxo3	795.096212390675	0.792140651092785	0.167972218692803	4.71590276807319	2.40641342227513e-06	0.000137567975340966	ENSMUSG00000048756
Pold2	1739.23675481705	-0.311496131483502	0.0660846550199468	-4.71359245787816	2.43387212614595e-06	0.000138673920840709	ENSMUSG00000020471
Fgd2	1096.84036371513	-0.284342678472474	0.0606151144516358	-4.69095342052598	2.71934880107579e-06	0.000154424681251789	ENSMUSG00000024013
Ctla4	394.225318705928	1.01682537062539	0.217329836399357	4.67871962484205	2.88671855664823e-06	0.000163386358572147	ENSMUSG00000026011
Cuedc1	76.7454947978775	0.988250569100126	0.211345926455736	4.67598588566648	2.92544728430133e-06	0.000165031915612418	ENSMUSG00000018378
ENSMUSG00000073821	6.97163111479541	2.4626904311678	0.527207981759061	4.67119337410425	2.99454859825167e-06	0.000168374405229986	ENSMUSG00000073821
Mrpl40	1121.93341309879	-0.331374775264857	0.0710119095099301	-4.6664676045434	3.06421930179415e-06	0.000171726886969073	ENSMUSG00000022706
Aaas	1846.85921800243	0.481740985300261	0.103319963024353	4.66261283104326	3.12219805306556e-06	0.000174404350722384	ENSMUSG00000036678
Col2a1	5.09108145402409	3.51772263683143	0.757118770870498	4.64619657070042	3.38110843541933e-06	0.000188251747513429	ENSMUSG00000022483
Bcl2l1	2021.54380128412	0.529356267879035	0.113962347165424	4.64501022526888	3.40059611525079e-06	0.000188722043499941	ENSMUSG00000007659
Atf5	1199.13293840153	0.392409950675784	0.0845507619947633	4.64111666669649	3.46531393914382e-06	0.000191691298258205	ENSMUSG00000038539
Slc19a1	443.217283509964	-0.582313743056813	0.125494771896431	-4.64014344388295	3.4816741813223e-06	0.000191975021875297	ENSMUSG00000001436
Tgtp2	2314.74377222611	0.603857643805966	0.130167047519136	4.63909764656215	3.49933697402362e-06	0.000192328510922784	ENSMUSG00000078921
Ifi213	842.150272521471	0.762668474373543	0.164621948952376	4.63284804503303	3.60669273056455e-06	0.000197593586036987	ENSMUSG00000073491
Itgb1	6737.26307380647	-0.326382361107721	0.0705152375644227	-4.62853664514053	3.68258705416579e-06	0.000201106902609763	ENSMUSG00000025809
ENSMUSG00000029161	7.49545444935888	3.16331970776984	0.684094652815715	4.62409652633551	3.76234644779997e-06	0.000202869993161656	ENSMUSG00000029161
Gnl3	12557.7385166985	-0.354381218542753	0.0766365428504932	-4.6241806501384	3.76082002852629e-06	0.000202869993161656	ENSMUSG00000042354
Dzip1	41.5168164095817	1.19035798529452	0.257392142711937	4.62468656872221	3.75165269194897e-06	0.000202869993161656	ENSMUSG00000042156
Basp1	483.036965204026	1.02170029530373	0.220947548124226	4.62417575563811	3.76090882255157e-06	0.000202869993161656	ENSMUSG00000045763
1600014C10Rik	418.883764952478	0.428097296592602	0.0930644396834199	4.60000939186733	4.22471892604598e-06	0.000227085284914792	ENSMUSG00000054676
Lgals3bp	1614.60387591647	0.890515698284677	0.193965870706221	4.59109478921395	4.40927013771029e-06	0.00023626223969869	ENSMUSG00000033880
Oaf	44.2991528735432	1.00318359121792	0.218610121776586	4.58891648321364	4.45552630553261e-06	0.000237994722313965	ENSMUSG00000032014
Ypel3	440.475320213361	0.831546433738878	0.181271821456427	4.58729010972486	4.49036498220456e-06	0.000239108438133404	ENSMUSG00000042675
Rnf114	2434.57748865758	0.312470807769785	0.0681808371140403	4.58297112496787	4.58415362256414e-06	0.000242672311739519	ENSMUSG00000006418
Pcbp1	11486.3116652749	-0.310449836481263	0.0677408967119893	-4.58290119484523	4.58568751488122e-06	0.000242672311739519	ENSMUSG00000051695
Itm2a	161.864690479534	0.816259220950585	0.178145067832819	4.58199169295334	4.60568194994681e-06	0.000242978152995188	ENSMUSG00000031239
Nek8	192.89185532393	0.423075919894779	0.092659193887415	4.56593568479383	4.97271224112538e-06	0.000261534062577096	ENSMUSG00000017405
Faap100	138.900562130188	-0.468896086053864	0.102800709738465	-4.56121448233947	5.08585975177398e-06	0.000265848931917653	ENSMUSG00000025384
H1f0	899.954256051676	0.828810599871371	0.181684146450248	4.56182124893507	5.07118122287709e-06	0.000265848931917653	ENSMUSG00000096210
Ifi209	3276.62376505861	0.528218144256389	0.115976321458535	4.55453438782541	5.25017361924314e-06	0.000273601273395497	ENSMUSG00000043263
Heatr3	2449.47585389698	-0.450981506319916	0.0991839494355043	-4.54692023141479	5.44366181211681e-06	0.000282822222962044	ENSMUSG00000031657
ENSMUSG00000035184	3.9194333439516	4.41120674566135	0.970319621703238	4.54613783643599	5.46392611786645e-06	0.00028301481555361	ENSMUSG00000035184
Cdc6	2318.58974084482	-0.323950158944413	0.0714117378096134	-4.53637131486812	5.72303827396113e-06	0.000295540462890687	ENSMUSG00000017499
Sord	343.245523112409	0.559941488179507	0.123866990629086	4.52050611172291	6.16919639236162e-06	0.000316666888692604	ENSMUSG00000027227
Scn4b	2.94626556193433	4.50205616410996	0.995830414170877	4.52090647166902	6.1575390599218e-06	0.000316666888692604	ENSMUSG00000046480
Dusp8	19.72294502734	1.86542176053024	0.412737616035154	4.51963108778377	6.19474814007599e-06	0.000317026437000955	ENSMUSG00000037887
Pdcd6ip	3830.22407660765	0.451014136119879	0.0999598357551599	4.511953553271	6.42332560329565e-06	0.000327742998618306	ENSMUSG00000032504
Cox6a2	17.7559595380348	1.62615118446478	0.361292466965717	4.50092745669975	6.76575958189358e-06	0.000344187882539604	ENSMUSG00000030785
Pbxip1	708.996094436939	0.408297066176746	0.090788968627019	4.49721009447877	6.88509458580878e-06	0.000349219352389405	ENSMUSG00000042613
Noa1	1202.08082833803	-0.351712284345261	0.078263734549572	-4.49393689643685	6.99183552351549e-06	0.00035358415563151	ENSMUSG00000036285
Tubb5	31878.122118367	-0.337103555739362	0.0751845205318143	-4.4836829889301	7.33656314362766e-06	0.000369922931604801	ENSMUSG00000001525
Azin2	100.409088848804	0.758706601472559	0.169326827729613	4.48072294063223	7.43906286200273e-06	0.000373987945588861	ENSMUSG00000028789
Pak6	11.1757679634534	1.7622234685059	0.393357358276749	4.47995551990177	7.46585958962953e-06	0.000374234422186327	ENSMUSG00000074923
Lacc1	396.305192089285	0.845965440340216	0.189020199969626	4.47552928457464	7.6222250020225e-06	0.000380955239647867	ENSMUSG00000044350
Axl	51.6847728794653	1.54267016083113	0.345164377886543	4.46937824313437	7.84472992675106e-06	0.000390821307546192	ENSMUSG00000002602
Bbs4	137.898598660729	0.558829713646892	0.125050941557384	4.46881652138904	7.86535598174049e-06	0.000390821307546192	ENSMUSG00000025235
Fbxw9	172.147861209719	0.791947193697963	0.177322560408966	4.46613894967152	7.9643893174847e-06	0.000394595091605119	ENSMUSG00000008167
Erich1	322.446762080701	0.469633450656271	0.105218358363583	4.4634173917963	8.0662705203224e-06	0.000398487751456274	ENSMUSG00000051978
Bfsp2	297.628379875331	0.522691141189385	0.11754328736056	4.44679703049353	8.7160119784876e-06	0.000429345224058469	ENSMUSG00000032556
Thop1	1197.70491828242	-0.437026973274898	0.0983642215297143	-4.44294649495984	8.87352380392363e-06	0.000435848110288697	ENSMUSG00000004929
Cpne2	82.5569789375527	1.08625671482523	0.244775530365432	4.43776677024671	9.08970318413035e-06	0.000445187096064012	ENSMUSG00000034361
Acot2	240.671490726015	0.642485337990707	0.145151606862085	4.42630537739181	9.58607913693959e-06	0.000468156716250595	ENSMUSG00000021226
Oas1c	162.684698181724	0.552389212310798	0.124974967832754	4.41999883568705	9.87014330350115e-06	0.000480656294834032	ENSMUSG00000001166
ENSMUSG00000043993	3.95617852273833	4.41088886512499	0.998095695682189	4.41930456589154	9.9019019290638e-06	0.000480832982026953	ENSMUSG00000043993
Csrnp2	95.2823734610281	0.760660578142273	0.172251406121095	4.41599052960717	1.00548486479352e-05	0.000486876849685993	ENSMUSG00000044636
Mat2a	7167.09093753528	-0.555319224834217	0.125798575389932	-4.41435225409284	1.01312878925105e-05	0.000487814377314597	ENSMUSG00000053907
ENSMUSG00000041347	39.1731625512244	1.38057130144141	0.312741577705711	4.41441560655081	1.0128321682957e-05	0.000487814377314597	ENSMUSG00000041347
Adsl	3043.66762025533	-0.243707609209087	0.0552741292884212	-4.40907188130305	1.03814566375439e-05	0.000498455725577355	ENSMUSG00000022407
Zfp456	87.2609417123637	0.814924246115237	0.184991201617257	4.40520543134423	1.05683675081534e-05	0.000506008699767134	ENSMUSG00000078995
Bend3	526.988032647712	-0.447149704034533	0.102095361666076	-4.37972594188001	1.18828658451019e-05	0.000565776673789209	ENSMUSG00000038214
Trio	237.327368933571	1.26128013296436	0.287951825601024	4.38017758814956	1.18582626914263e-05	0.000565776673789209	ENSMUSG00000022263
Ccna2	5960.29737722532	-0.267360490490447	0.0610763644007577	-4.37747880237498	1.20060033600352e-05	0.000570051709536336	ENSMUSG00000027715
Tmem248	1656.57218070392	-0.250711720249832	0.0573555319620128	-4.37118638208919	1.23573249762502e-05	0.000585107356839459	ENSMUSG00000053094
ENSMUSG00000091712	4.28718694920128	4.03769958577866	0.924515001881009	4.36737054300212	1.25751285511026e-05	0.000593775337911595	ENSMUSG00000091712
Rel	3424.04789168412	0.603685494879841	0.138402750938437	4.36180271552816	1.28995161957982e-05	0.000607414408635754	ENSMUSG00000020275
Gm17300	95.071165816298	-0.783851172677141	0.179767064216006	-4.36037144009469	1.29841849345507e-05	0.000608051159140479	ENSMUSG00000091021
2610008E11Rik	321.523509074862	0.401758241024736	0.0921263216381785	4.36094955144981	1.29499224605244e-05	0.000608051159140479	ENSMUSG00000060301
Ahi1	191.388692397362	0.550608065878271	0.126298741195903	4.35956891307585	1.30318910674548e-05	0.000608617797857939	ENSMUSG00000019986
Rnasel	215.753957872138	0.716816133958765	0.164509111448019	4.35730354172671	1.31674597746226e-05	0.000613273542037121	ENSMUSG00000066800
Lmna	128.331383836533	0.904985561188761	0.208013083731922	4.35061845607301	1.35754093087965e-05	0.000629320630934796	ENSMUSG00000028063
Casp4	1086.43279361958	0.440801135779685	0.101323035631399	4.35045331037321	1.35856381451436e-05	0.000629320630934796	ENSMUSG00000033538
Lgals9	4093.94574020306	0.329133537406814	0.0757430447425339	4.34539618159801	1.39024513599438e-05	0.000640524531254769	ENSMUSG00000001123
Tgif1	743.817700027424	0.384420690845687	0.0884571173635329	4.34584239576597	1.38742164371814e-05	0.000640524531254769	ENSMUSG00000047407
Exo1	1425.00272986016	-0.302624761957906	0.0697014517444662	-4.34172824789022	1.41366316631577e-05	0.00064956302424289	ENSMUSG00000039748
Spib	2195.11026262158	0.396564784047123	0.0913721683047997	4.34010477593418	1.42414794995465e-05	0.000652626297817018	ENSMUSG00000008193
Afg1l	119.500914281182	0.589301005901738	0.135809865749855	4.3391619794924	1.43027075886964e-05	0.000653679627843816	ENSMUSG00000038302
Nup133	1771.94348338	-0.279098364871006	0.0643604029988675	-4.33649187802502	1.44774773993679e-05	0.00065990272316639	ENSMUSG00000039509
Plpbp	779.092968732406	0.403611133685324	0.0931869111208753	4.33119983086239	1.48299014601475e-05	0.000672515748453228	ENSMUSG00000031485
Celf4	54.3523010593846	1.20157162026287	0.277425179545875	4.33115560105161	1.4832881130689e-05	0.000672515748453228	ENSMUSG00000024268
Dus1l	2724.69685014458	-0.262326576480944	0.0606231567189705	-4.32716787905001	1.51038842729115e-05	0.000682347921765099	ENSMUSG00000025155
Eif1a	5668.40942101034	-0.20716278546699	0.0478790568478561	-4.32679336448261	1.51295771572557e-05	0.000682347921765099	ENSMUSG00000057561
Tcp11l2	139.818728257521	0.712790988264054	0.164871952955239	4.3233004491526	1.53712172885796e-05	0.000689606869064808	ENSMUSG00000020034
Prkch	9.70426953413804	1.92689396546672	0.445652012054588	4.32376363921968	1.53389634552909e-05	0.000689606869064808	ENSMUSG00000021108
Pitrm1	3667.21411904738	-0.316615811276144	0.0733771757249359	-4.31490866401047	1.59668904862125e-05	0.000714455652044056	ENSMUSG00000021193
ENSMUSG00000112324	289.488986772056	0.916505440028811	0.212614399958332	4.31064612842981	1.62778218786242e-05	0.000726466865199278	ENSMUSG00000112324
Tctn1	90.263198557022	0.879698030971987	0.204117628346014	4.30976020101874	1.63431664168306e-05	0.000727483707195015	ENSMUSG00000038593
Gm8369	536.287031901582	0.548242440403725	0.127230005996618	4.309065586449	1.63945748203171e-05	0.000727876538710858	ENSMUSG00000058470
Ctbp1	3017.84173981075	-0.236513035810015	0.0549251638158246	-4.30609613843104	1.66160864948736e-05	0.000735799913100712	ENSMUSG00000037373
Sqle	3199.49886789063	-0.40511878230336	0.0941877125588119	-4.30118506222772	1.69887100627271e-05	0.000750356643674922	ENSMUSG00000022351
Tmem43	450.14538300171	0.777988411814186	0.180927841500039	4.29999277813757	1.70803675424049e-05	0.000752460624748267	ENSMUSG00000030095
Sec23ip	3068.56706857599	-0.2172685534192	0.0506306934691482	-4.29124190352228	1.7767663070995e-05	0.000780726644916497	ENSMUSG00000055319
Htra2	924.140007040913	-0.369124511892528	0.086066132460171	-4.28884744023264	1.79602679496121e-05	0.000787166307853127	ENSMUSG00000068329
Acsl3	2679.3254341422	-0.368396328837577	0.0859245127891265	-4.28744157958376	1.80742770923999e-05	0.000790137131305349	ENSMUSG00000032883
Ybx3	11957.052415532	-0.277567110128878	0.0647885021653908	-4.28420322822574	1.83395221954632e-05	0.000799687379813908	ENSMUSG00000030189
Bag2	479.750782736989	-0.367803687767056	0.0859507446767945	-4.27923794203447	1.87534296312456e-05	0.000815654892333029	ENSMUSG00000042215
Zfp947	45.9727708576185	0.764169320599552	0.178803747446946	4.27378805819657	1.92179721891297e-05	0.000833738067585771	ENSMUSG00000063383
Fam214a	358.841723561705	0.392622158818614	0.0919885129387797	4.26816508143699	1.97087456730927e-05	0.000852864784278919	ENSMUSG00000034858
Phf11b	1462.40102478885	0.563970673327211	0.132365401858754	4.26071061929778	2.03777942734349e-05	0.000879589993726826	ENSMUSG00000091649
Tgtp1	1624.02440878193	0.575978429748085	0.135396150694292	4.25402366902273	2.09963093196591e-05	0.00090400482418371	ENSMUSG00000078922
Agfg2	384.020875552558	-0.445912673307307	0.104896509232211	-4.25097724005462	2.1283979848489e-05	0.000914088109422671	ENSMUSG00000029722
Sapcd2	454.728478805781	-0.471945354431416	0.111090689468384	-4.24828900324477	2.1540939487374e-05	0.000922805209668379	ENSMUSG00000026955
Trim30b	386.351143993129	0.64191831520061	0.151244834459014	4.24423298485981	2.19342370426913e-05	0.000937304784426808	ENSMUSG00000052749
Pgd	4353.45306390648	-0.241209893044237	0.0568631740704948	-4.24193508341977	2.21600796152753e-05	0.000944594116867583	ENSMUSG00000028961
Tm7sf3	391.77985832355	0.37590302991944	0.0887732129468545	4.23441956690787	2.29142779346384e-05	0.000973003959759011	ENSMUSG00000040234
F9	27.8062025050201	1.17368467135072	0.27719400170483	4.23416330848498	2.29404198082771e-05	0.000973003959759011	ENSMUSG00000031138
Parp8	171.628952616802	0.692708310402379	0.163701137734819	4.23154243145521	2.32094197986059e-05	0.000981976763904876	ENSMUSG00000021725
Ppat	4517.24075839566	-0.34486128598091	0.0815249103346165	-4.23013388871496	2.33552263111671e-05	0.000985705884782172	ENSMUSG00000029246
Iqcg	151.525193100484	0.671048852252238	0.158953127360759	4.22167756869123	2.42490816194241e-05	0.00102091022689856	ENSMUSG00000035578
ENSMUSG00000018566	4.93526708678112	3.18163391417454	0.753895586872667	4.22025804312331	2.44022838346161e-05	0.00102483596458254	ENSMUSG00000018566
Gclm	652.985804107296	-0.340425326866773	0.0807079041413227	-4.21799240717087	2.46487117354627e-05	0.00103264811199575	ENSMUSG00000028124
Wdr91	417.559066651931	0.392306228208987	0.0931756814124177	4.21039290791495	2.54926944501803e-05	0.00106539517417343	ENSMUSG00000058486
Gm15417	16.8901239811589	1.82918831310208	0.435301346104298	4.20211958789535	2.64427371038626e-05	0.00110240415930811	ENSMUSG00000074466
Hsd17b11	267.57675407004	0.701700598854651	0.167030441885442	4.2010342003161	2.65698445756725e-05	0.00110419390359846	ENSMUSG00000029311
ENSMUSG00000110631	13114.5230651141	1.17554758488636	0.279848908972309	4.20065094841116	2.66148650490006e-05	0.00110419390359846	ENSMUSG00000110631
Hlx	552.347052610319	0.662636728314463	0.157793867712826	4.19938200336414	2.67644458925976e-05	0.00110771107419412	ENSMUSG00000039377
Arl4c	140.745617922121	0.626527819785466	0.149260429014498	4.19754803012531	2.69820444899847e-05	0.00111401953252973	ENSMUSG00000049866
Slc66a2	306.855214868026	0.80905590036716	0.192868616253144	4.19485510958017	2.73046069285214e-05	0.00112462083428727	ENSMUSG00000034006
Ppif	852.442435569493	-0.352485653442164	0.0840470983642171	-4.19390627758108	2.7419130607046e-05	0.00112662307563999	ENSMUSG00000021868
Arrdc3	306.050632299564	0.575340330934308	0.137206336874884	4.19324897113862	2.74987348914664e-05	0.00112718435371663	ENSMUSG00000074794
Sigmar1	752.744577778402	-0.583223368538208	0.139225359364356	-4.18905988967066	2.80112473796969e-05	0.00114544557765828	ENSMUSG00000036078
Cdk4	4721.0858586677	-0.466008489535743	0.111310052835081	-4.1865804360563	2.83188604729026e-05	0.00115526081638025	ENSMUSG00000006728
ENSMUSG00000107750	17.5402119093955	1.45085711008355	0.346892991621941	4.1824341947639	2.8840450821168e-05	0.00117373768068149	ENSMUSG00000107750
Kifc1	2713.7974382367	0.391514484985076	0.0938741491123161	4.1706315176998	3.03756688240711e-05	0.00123191942543531	ENSMUSG00000079553
Bloc1s2	1799.12036662921	0.671574771456151	0.161035874986893	4.17034261161255	3.04142045008894e-05	0.00123191942543531	ENSMUSG00000057506
Hivep2	185.222205592736	0.653448784356861	0.156734602291577	4.16914181554648	3.05748708503735e-05	0.00123549945022561	ENSMUSG00000015501
Katnal1	60.3539920233993	0.68703320993097	0.165072192316875	4.16201663216619	3.1544936863048e-05	0.00127169246650962	ENSMUSG00000041298
Gm3636	22.9010503592609	-1.14278119348589	0.274922785761734	-4.1567351004376	3.22827942091369e-05	0.00129837600333359	ENSMUSG00000091754
Acbd5	744.062291982637	0.336276849366795	0.0809935312481104	4.15189761681912	3.29729777242673e-05	0.00132302138084719	ENSMUSG00000026781
Gpld1	5.09497845916864	3.28311353693323	0.791173638460831	4.14967508690036	3.32947535231367e-05	0.00133280379852687	ENSMUSG00000021340
Ppm1d	931.212671494637	0.34542881729644	0.0832611033689935	4.14874176919781	3.34307657636261e-05	0.00133512168036837	ENSMUSG00000020525
ENSMUSG00000023972	5.99086117886762	2.962554721376	0.714809932240733	4.1445349144621	3.40504076156239e-05	0.00135669840879688	ENSMUSG00000023972
ENSMUSG00000114988	7.13557218726929	2.57379398753767	0.624673475247099	4.12022294770811	3.78505961859043e-05	0.00150460521071084	ENSMUSG00000114988
Cpd	26.9714848004401	1.12885251651181	0.274593559833103	4.11099414421054	3.93959193299805e-05	0.00156240011393818	ENSMUSG00000020841
ENSMUSG00000026414	55.6359153460062	0.766958791209308	0.187246779927788	4.09597853434429	4.20388884865287e-05	0.00166335815023203	ENSMUSG00000026414
Klhl42	278.390060142908	0.54553548111388	0.133343782197072	4.09119549577213	4.29155166625523e-05	0.00169412223166976	ENSMUSG00000040102
Ube2h	1578.42673902445	0.417555259642588	0.102238356372063	4.0841350982114	4.42412875948921e-05	0.00174243393746426	ENSMUSG00000039159
Pms2	609.726781829099	-0.251343074871472	0.0615745573097971	-4.08193068456671	4.46631187531416e-05	0.00175097864414553	ENSMUSG00000079109
Ptcd2	1430.51209469838	-0.239928451588559	0.0587710016955325	-4.0824291685809	4.45673976169292e-05	0.00175097864414553	ENSMUSG00000021650
Kansl2	2077.66875378803	-0.296103472086103	0.0725647332444559	-4.08054241843059	4.49307286074557e-05	0.00175743923132091	ENSMUSG00000022992
Prmt3	1223.06630369684	-0.335860908287048	0.0823502543952485	-4.07844408925623	4.53381022755724e-05	0.00176932461688666	ENSMUSG00000030505
Whrn	110.304866299985	0.666743832728045	0.163572967867472	4.07612481096659	4.57924462294239e-05	0.00178298470022675	ENSMUSG00000039137
Srm	3770.28067488413	-0.428666495243591	0.105237484304169	-4.07332518520313	4.63466420817838e-05	0.00180046171159984	ENSMUSG00000006442
Mcrs1	855.007760622466	-0.251222495592092	0.0617111577436432	-4.07094121675218	4.68235650604118e-05	0.00181486439360004	ENSMUSG00000037570
Zkscan7	33.2575478228429	0.903128632346519	0.222417937326221	4.06050268788303	4.89671735011443e-05	0.0018936558747852	ENSMUSG00000063488
Ccrl2	115.057498240661	1.03489157019001	0.255100890530254	4.05679324771809	4.97510859794172e-05	0.00191962824525097	ENSMUSG00000043953
Ctc1	886.04875213593	0.576997672336117	0.142252236307869	4.05615888587757	4.98863305351079e-05	0.00192051136900135	ENSMUSG00000020898
Coasy	831.630693482973	-0.210105387935159	0.0518269973416008	-4.05397570209051	5.03544488891152e-05	0.00193417661766662	ENSMUSG00000001755
Farsb	2802.2825223943	-0.277861014239208	0.0686272236298712	-4.04884533487472	5.14709440684577e-05	0.00197262970170885	ENSMUSG00000026245
Kif1c	2605.0484024273	0.450531516413666	0.111300152931387	4.04789665196062	5.16799547314364e-05	0.00197620909669898	ENSMUSG00000020821
Btbd1	2195.17945512623	-0.204529223753961	0.0505523220375374	-4.04589177134313	5.21243124529652e-05	0.00198875194812173	ENSMUSG00000025103
Rgs18	63.7725593399543	0.779881453085025	0.192990395148606	4.04103765104218	5.32152128980363e-05	0.00202585219168404	ENSMUSG00000026357
Dlat	1437.97223523767	-0.213424762964907	0.0528444761113446	-4.0387336325412	5.37405495859881e-05	0.00204130492016288	ENSMUSG00000000168
Hspa2	222.007925411211	0.631471013999952	0.156403582358481	4.03744597455961	5.4036283668947e-05	0.00204798713249071	ENSMUSG00000059970
Ncf2	2492.12035197025	0.366470377551539	0.0911532094302019	4.02037821643739	5.81047807317578e-05	0.00219731198461933	ENSMUSG00000026480
Cfap126	27.3395297729093	0.903578759044439	0.224860848583752	4.01839077249543	5.85969610767942e-05	0.00220625103082247	ENSMUSG00000026649
Rcc1l	521.497988507924	-0.354251989248269	0.088157882434744	-4.01838133431225	5.85993077864273e-05	0.00220625103082247	ENSMUSG00000061979
Tfdp2	305.888332130329	0.534493979962966	0.133285361098999	4.01014766779951	6.06807859535711e-05	0.00227959708638328	ENSMUSG00000032411
Slc52a2	174.143795903858	-0.494231828519323	0.123309327659791	-4.00806522830861	6.12182139073694e-05	0.00229474326824269	ENSMUSG00000022560
Cdca4	1596.69182189556	-0.235061093068706	0.0588143142964248	-3.9966646875112	6.42411948878016e-05	0.00240278937465469	ENSMUSG00000047832
Peli3	7.76548324114435	2.28232648011747	0.571228616393083	3.99546944011454	6.45661858253713e-05	0.002409672083653	ENSMUSG00000024901
Jchain	162.128738799078	-1.14304240297052	0.286332560211051	-3.99200985779614	6.55156486088097e-05	0.00243977991649321	ENSMUSG00000067149
Plcd3	80.7419363870774	0.696155129274126	0.174704406092879	3.98476000029459	6.75483613276942e-05	0.00251000900037886	ENSMUSG00000020937
Utrn	263.360458905553	1.35247619386339	0.3394888563352	3.98386034953678	6.78047276284613e-05	0.00251406986844531	ENSMUSG00000019820
Npr2	5.76430058970419	5.47372102489459	1.37439406996886	3.98264307486323	6.815307058702e-05	0.00252151609425094	ENSMUSG00000028469
Zfp820	50.8563180224941	0.804586576826919	0.202153900700675	3.9800695115859	6.88951199477292e-05	0.0025434649789774	ENSMUSG00000069743
Fosb	5.30727051787072	2.6221946784575	0.660684797708814	3.96890421506746	7.22038958805333e-05	0.00265987325923697	ENSMUSG00000003545
Btg1	4141.85462949754	0.423824191742023	0.106848572164686	3.96658732218509	7.29090710743549e-05	0.00268007473521279	ENSMUSG00000036478
Dapk1	2.99393772622224	4.01034099066474	1.01132894678455	3.96541699257726	7.32677468738314e-05	0.00268747982256309	ENSMUSG00000021559
Mars1	4205.83543972485	-0.259467890052893	0.0654788348952808	-3.96262228043391	7.41310166679051e-05	0.0027133222010803	ENSMUSG00000040354
ENSMUSG00000049281	3.22548551937336	4.1033146688132	1.03725940827161	3.95591945090244	7.62408485355511e-05	0.00278458295730379	ENSMUSG00000049281
Zfp949	240.606695422628	0.607403303995773	0.15357280087384	3.95514896218345	7.64869795252205e-05	0.0027876160789437	ENSMUSG00000032425
Ube2g1	1979.97571189005	-0.223400748756588	0.0565172799794044	-3.95278663159299	7.72463126712838e-05	0.00280930047338352	ENSMUSG00000020794
Dffb	448.462748557938	0.348896165046074	0.0882793741314384	3.9521821317696	7.74417616043092e-05	0.00281042894076955	ENSMUSG00000029027
Mafg	1047.65202862638	-0.270401547364905	0.0684735656108914	-3.94899177445339	7.84810480897717e-05	0.00284211134533574	ENSMUSG00000051510
Ets2	189.557224163616	0.402640499111507	0.102016350388556	3.94682320606397	7.91949906484039e-05	0.00286190269588407	ENSMUSG00000022895
Fcgr2b	2235.46733468312	-0.326582321515482	0.0828001513647417	-3.94422372583426	8.00588907249533e-05	0.00288701818388529	ENSMUSG00000026656
Gcdh	508.667706030354	0.486781615433326	0.123536100861099	3.94039970535132	8.13459555632461e-05	0.00292725561777382	ENSMUSG00000003809
Clk1	4012.94022220354	0.279499277148305	0.0709737920031257	3.93806318163183	8.2141967800997e-05	0.00294969045298832	ENSMUSG00000026034
Atp8b4	52.3422620670175	0.792825126211041	0.201708417126705	3.93055053182546	8.47515783476317e-05	0.00303702039558924	ENSMUSG00000060131
Krit1	1337.42731991472	0.184069739460287	0.0468656872786431	3.92760141051358	8.57972479315142e-05	0.00306165419393188	ENSMUSG00000000600
Tifab	29.9765579322359	1.14030411714525	0.290312758447442	3.92784706825654	8.57096817917623e-05	0.00306165419393188	ENSMUSG00000049625
Smyd2	473.383207942022	-0.298086571054078	0.0759175753236308	-3.92645009779827	8.62087677365561e-05	0.00306993013941865	ENSMUSG00000026603
Vmac	85.6416714253916	0.583257467434091	0.148711281654564	3.92207948815155	8.77880189378457e-05	0.00311966862308648	ENSMUSG00000054723
Oasl2	1089.25002635578	0.555575288416532	0.141730563723676	3.9199398761985	8.85710622151193e-05	0.00314096507560796	ENSMUSG00000029561
Cpt1c	16.7765769026431	1.43528613067267	0.366667332202345	3.91440961498202	9.06256767629879e-05	0.00320717327724586	ENSMUSG00000007783
Fastkd3	632.174617959353	-0.382458159248066	0.0977783282880188	-3.91148187890353	9.17315400478617e-05	0.0032396016818969	ENSMUSG00000021532
Nup155	2036.42644273618	-0.255048677677968	0.0654108192051818	-3.89918182920056	9.651827538717e-05	0.00340162243544927	ENSMUSG00000022142
Zfp974	78.2291146776329	0.517526908314493	0.132782934985837	3.89754081252757	9.71744495702191e-05	0.0034177013714069	ENSMUSG00000070709
Ruvbl2	4923.90179549299	-0.242591294936801	0.0622756991395741	-3.89544073030956	9.8020330107801e-05	0.0034403726951389	ENSMUSG00000003868
Pcsk4	130.974983759605	-0.741610691886555	0.190412454213246	-3.89475937879575	9.82962582090196e-05	0.00344298758517781	ENSMUSG00000020131
Ptpdc1	69.1306086731349	0.828909505573081	0.212969290878489	3.89215507153105	9.93577020125878e-05	0.00347304948977743	ENSMUSG00000038042
Zfp629	78.5271225339742	0.721595049814062	0.185525749942411	3.88946035813386	0.000100467377611908	0.00350467119493948	ENSMUSG00000045639
Bcl6	212.909848792758	0.810048448454247	0.208369029461649	3.88756645144013	0.000101254272591463	0.00351776276708513	ENSMUSG00000022508
Pgp	1816.12694644414	-0.523320302062892	0.134600653608728	-3.88794770331605	0.000101095400930294	0.00351776276708513	ENSMUSG00000043445
Ikbke	504.322322174573	0.676863155543498	0.174205302549004	3.885433713208	0.000102147362397661	0.00353281208684676	ENSMUSG00000042349
Zbtb7b	354.034469216018	0.691344422082109	0.177972258399213	3.88456284311086	0.000102514175105364	0.00353281208684676	ENSMUSG00000028042
Ppp1cc	9078.72476558243	-0.203416239893363	0.0523623377213307	-3.88478148122288	0.000102421967468444	0.00353281208684676	ENSMUSG00000004455
Zfp688	161.061566732567	0.503492963398969	0.129581968988352	3.88551715435215	0.000102112281885048	0.00353281208684676	ENSMUSG00000045251
Bcl2	1822.06194042086	0.399088284762989	0.102792702344701	3.88245736963605	0.000103406148944359	0.00354923956607617	ENSMUSG00000057329
Xaf1	875.761025252246	0.533417208997934	0.13739009350412	3.88250124439967	0.000103387487111082	0.00354923956607617	ENSMUSG00000040483
ENSMUSG00000116138	174.113432920542	-0.421897926011372	0.10890027998688	-3.87416750500733	0.000106989807031271	0.00366488330979061	ENSMUSG00000116138
Umps	2935.56266622699	-0.317637171884355	0.0820387971635142	-3.87179216256989	0.000108038057372358	0.00369338902933144	ENSMUSG00000022814
Pard6g	173.342517406023	0.412231589458191	0.106640590462658	3.86561615675357	0.000110809095265395	0.00378055861351577	ENSMUSG00000056214
Telo2	506.798487241105	-0.355029144747145	0.0919277751809393	-3.86204435001662	0.000112442147456594	0.00382863272206289	ENSMUSG00000024170
Dapp1	1179.87924453	0.296157953292668	0.0767508864906574	3.85869097849075	0.000113995969070842	0.00387382325910121	ENSMUSG00000028159
ENSMUSG00000028600	3.04794125062578	4.0297741694903	1.04450528721262	3.85806967070908	0.000114286073618414	0.0038759759054753	ENSMUSG00000028600
Gm28373	11.8446030377325	1.47303285562211	0.381858228297085	3.85753860062456	0.000114534595703045	0.00387671256307356	ENSMUSG00000096751
Shmt1	3722.2625462657	-0.490729071868783	0.127306800494934	-3.85469644952951	0.000115873308568562	0.00391427364300877	ENSMUSG00000020534
Zfp994	277.094980299491	0.321569489651508	0.0834906639577398	3.85156225149048	0.000117366685616198	0.00395690090184945	ENSMUSG00000096433
Dyrk3	128.244917101789	0.459752398875683	0.119413169218264	3.85009795724746	0.000118070593552596	0.00397279656613096	ENSMUSG00000016526
Oas1a	1681.56261309697	0.49244799991033	0.127978253125181	3.84790374837079	0.000119132838428432	0.0040006632755544	ENSMUSG00000052776
Slfn5	1324.10006423536	0.509316185364819	0.132476567328377	3.84457565315948	0.000120761226326823	0.00404739537569488	ENSMUSG00000054404
Yars	4339.3295721074	-0.259711185097045	0.0675702997229322	-3.84357012122153	0.000121257331674008	0.00405606960920512	ENSMUSG00000028811
Sdccag8	677.39474376485	0.301682571376979	0.078510608960378	3.84257077319614	0.000121752289401513	0.0040567483094348	ENSMUSG00000026504
Apol10b	10.4768193205821	1.50147061127484	0.39074207724785	3.84261306550421	0.000121731304298086	0.0040567483094348	ENSMUSG00000050014
Fbxo31	467.35269173979	-0.333289930362439	0.0867507498007393	-3.84192564476945	0.000122072820057855	0.00405951500632085	ENSMUSG00000052934
Ftl2-ps	1006.79768204976	-0.452031960264849	0.117767717897899	-3.83833505763223	0.000123871380320412	0.00410948495484926	ENSMUSG00000082062
Usp44	109.6182886957	0.806692794482221	0.21018743485493	3.83796869227219	0.000124056294196585	0.00410948495484926	ENSMUSG00000020020
Irf6	12.324261705155	1.76719334659031	0.460635698184096	3.83642291198205	0.000124839357535067	0.0041194577960365	ENSMUSG00000026638
Klhl24	302.747827564075	0.704628866469702	0.183646093001611	3.8368846020782	0.000124604987338708	0.0041194577960365	ENSMUSG00000062901
Itgb3	1308.13587317863	0.811029065022423	0.211489519538744	3.83484281770211	0.000125644617699589	0.0041380413301331	ENSMUSG00000020689
Rbm43	632.025886588384	0.295660751216389	0.0771477491485894	3.8323963366311	0.000126901078029262	0.00416337836229207	ENSMUSG00000036249
Ghitm	4784.06304198175	0.283500596821316	0.0739737787130689	3.83244714212807	0.000126874865427185	0.00416337836229207	ENSMUSG00000041028
Bex2	13.5250647621561	1.42550193200742	0.372130440174208	3.83065123976444	0.00012780454878032	0.00418498688180463	ENSMUSG00000042750
Tmem97	926.214961202558	-0.525729050852697	0.13737049817882	-3.82708847840339	0.000129667915395035	0.00423788466127596	ENSMUSG00000037278
Tlnrd1	962.128798436806	-0.285060144056467	0.0745047848789152	-3.82606492347767	0.000130207962823422	0.00424741356591748	ENSMUSG00000070462
Sephs1	2010.67657152104	-0.301710399775498	0.0789954547023898	-3.81933873173048	0.000133809908184421	0.00434903083923589	ENSMUSG00000026662
Surf2	1766.37097159699	-0.307743034489109	0.0805856974633799	-3.8188294471107	0.000134086424400475	0.00434903083923589	ENSMUSG00000014873
Cdc7	1105.16461959344	-0.267453617533828	0.0700271172215615	-3.81928641568409	0.000133838288415052	0.00434903083923589	ENSMUSG00000029283
Dnajb5	297.799762608196	0.387824031369747	0.10171331181453	3.81291322100421	0.000137338343935136	0.00443766410752982	ENSMUSG00000036052
Pink1	453.091406551867	0.578653347843829	0.151743165637694	3.81337337607308	0.00013708277385019	0.00443766410752982	ENSMUSG00000028756
Igkv3-4	143.055097551599	-0.624933236543459	0.164178565492923	-3.80642402780891	0.00014099057536228	0.00453851582799897	ENSMUSG00000096715
Tlr3	56.1966743590984	0.631380448678296	0.1658716568482	3.80643963336132	0.000140981683566218	0.00453851582799897	ENSMUSG00000031639
Nudcd1	1892.80272765052	-0.219647953837788	0.0577223415190303	-3.80525023859908	0.000141660897898419	0.00454799697130452	ENSMUSG00000038736
Zfp760	214.103166016281	0.362719476109779	0.0953276347706967	3.80497719241931	0.000141817257690593	0.00454799697130452	ENSMUSG00000067928
Dars	7768.68058682335	-0.213976087077209	0.0562847976444097	-3.80166752004769	0.000143725511909271	0.00460056212559022	ENSMUSG00000026356
Fam171b	6.29652670132031	2.88315355055005	0.758517909463208	3.80103556498807	0.000144092616082553	0.00460369175083941	ENSMUSG00000048388
Phykpl	457.872121992288	-0.417314625585534	0.109818598759449	-3.80003597113488	0.000144675085961162	0.00461367769465326	ENSMUSG00000020359
Trim28	7292.59056144782	-0.271150818654521	0.0713854039914632	-3.79840700610095	0.000145629047729473	0.0046354512343387	ENSMUSG00000005566
Srsf6	10963.0685049954	-0.326221853642761	0.0860840129117182	-3.78957535329251	0.000150905031183311	0.00479446040523482	ENSMUSG00000016921
ENSMUSG00000117284	661.891692946435	0.235964991739542	0.0623708993604069	3.78325459724463	0.000154790935678782	0.00490879677839967	ENSMUSG00000117284
Get1	147.306751395656	-0.423798784800896	0.112157799778296	-3.77859395992634	0.000157716343689045	0.00499230641236452	ENSMUSG00000023147
Cd81	1835.55116344118	0.729513925265067	0.193135295596631	3.77721701779813	0.000158590536102282	0.00499637658874527	ENSMUSG00000037706
Mthfsd	262.636363047851	-0.318101166568122	0.0842203484403995	-3.77701081103023	0.000158721844479534	0.00499637658874527	ENSMUSG00000031816
Wdr37	912.408099227661	0.221325160860157	0.0585959304810144	3.77714218450492	0.000158638176635737	0.00499637658874527	ENSMUSG00000021147
Gm28187	27.6560626467251	0.969622098418623	0.25701578113815	3.7726169736536	0.000161544188030134	0.00506655927706253	ENSMUSG00000099375
Thyn1	630.249296800341	0.77191927088664	0.204594863921845	3.77291617242901	0.000161350511708288	0.00506655927706253	ENSMUSG00000035443
Tacc2	111.413654488916	0.55951406911673	0.148460701416098	3.76876886462063	0.000164054711798492	0.00513341337991848	ENSMUSG00000030852
Slfn8	1262.86240995257	0.399455608631853	0.106000491192133	3.76843167554585	0.000164276435898637	0.00513341337991848	ENSMUSG00000035208
Nme6	320.709889260534	-0.295256046855439	0.0784135233536377	-3.76537151026695	0.000166301627258288	0.00518721480789402	ENSMUSG00000032478
Nrp2	667.165416082981	-0.488772150923075	0.129969103090693	-3.76067957152869	0.000169452379594263	0.00527586434317802	ENSMUSG00000025969
Ccne1	1596.88609409574	-0.352876217582202	0.0939238241437978	-3.75704695586017	0.000171930245297501	0.00534327942340034	ENSMUSG00000002068
Prmt7	1409.0444910675	-0.295492852535385	0.0786783698902545	-3.75570633895386	0.000172853280445889	0.00536221619357819	ENSMUSG00000060098
Dnajb4	247.085331592321	0.531625153787871	0.141637254996464	3.75342740016489	0.0001744330681328	0.00540142107535137	ENSMUSG00000028035
Chchd5	88.7642890864922	0.601101976586471	0.160399703441009	3.74752548596538	0.000178587695966877	0.00551010737754843	ENSMUSG00000037938
Ltbp1	6.45345297072426	2.36142614364703	0.630102320985045	3.74768678832255	0.000178472921544264	0.00551010737754843	ENSMUSG00000001870
Sqor	3.02911761138437	3.9977483671726	1.06716790383444	3.74612875144418	0.000179584446542475	0.00551101785413022	ENSMUSG00000005803
Stoml2	3654.42341584844	-0.378685388404493	0.101081968065054	-3.74631989912168	0.000179447729704824	0.00551101785413022	ENSMUSG00000028455
Phf11c	443.191644387306	0.512688322835918	0.136840129617723	3.74662260455443	0.000179231422266954	0.00551101785413022	ENSMUSG00000091144
Ppfibp2	136.410139188241	0.607647532696966	0.162238184875593	3.74540391439241	0.00018010377075475	0.00551704973747481	ENSMUSG00000036528
Gm21738	6.62421412315315	-4.21127091823809	1.12481229984418	-3.7439765895354	0.000181130537161587	0.00551883114385562	ENSMUSG00000095280
Slain1	526.025362413256	-0.320883903821835	0.0856997036416877	-3.74428253758563	0.000180909986770497	0.00551883114385562	ENSMUSG00000055717
Ifit2	1075.88210377336	0.675857308086444	0.180508734364705	3.74418063738081	0.000180983416052382	0.00551883114385562	ENSMUSG00000045932
Hacd2	452.154171653623	0.43302964575276	0.115695210134475	3.742848517665	0.000181945922645672	0.00553381077541365	ENSMUSG00000035376
Oas3	787.653122179496	0.85763241861185	0.229220786982707	3.741512407758	0.000182916144928001	0.00555343812656185	ENSMUSG00000032661
Gm43430	21.812469726944	1.0868261217221	0.290755134234719	3.73794301030205	0.000185531986714699	0.00557538108449323	ENSMUSG00000106149
Fam136a	2515.00272967346	-0.336847260980361	0.0901054413049982	-3.73836758470741	0.000185219003745455	0.00557538108449323	ENSMUSG00000057497
Prmt1	4219.74025324046	-0.258018879050179	0.0690367274394253	-3.73741468664736	0.000185922144630032	0.00557538108449323	ENSMUSG00000109324
Lpar2	120.915150320959	-0.516542743282892	0.138197005775909	-3.73772745930895	0.000185691074369542	0.00557538108449323	ENSMUSG00000031861
Carnmt1	3212.00945414035	-0.394474716023723	0.105486407921166	-3.73957862247552	0.000184328989280424	0.00557538108449323	ENSMUSG00000024726
Trub1	748.439490662553	-0.219764085186373	0.0587726585803707	-3.73922314379991	0.00018458981952075	0.00557538108449323	ENSMUSG00000025086
Zxdb	647.473855318909	0.326360777440193	0.0872898320106402	3.73881779724826	0.000184887663371977	0.00557538108449323	ENSMUSG00000073062
Amd1	6001.42263847851	-0.469011645687226	0.125530807996801	-3.73622741039936	0.000186801743530672	0.00559194781465811	ENSMUSG00000075232
Prkar2a	824.234780706725	-0.372463806238119	0.099750445010354	-3.7339563367307	0.000188495186572075	0.00563000137619392	ENSMUSG00000032601
Fkbp5	1883.94170435035	-0.284143060276308	0.0761034828881206	-3.73364068887656	0.000188731690666303	0.00563000137619392	ENSMUSG00000024222
ENSMUSG00000074652	5.43280472508963	2.15927897300863	0.578417437235518	3.73308070263004	0.000189151955587313	0.00563270797361313	ENSMUSG00000074652
Fbxl14	1428.32430110618	-0.390738670415638	0.104711907390988	-3.73155909534379	0.000190298355430642	0.00565699093804516	ENSMUSG00000030019
Msrb3	123.024607331151	0.728210483842594	0.195190490367679	3.73076824834483	0.00019089676631269	0.0056649278239285	ENSMUSG00000051236
ENSMUSG00000087651	58.4010508941451	0.818064037105677	0.219300926504098	3.73032640648871	0.000191231864765227	0.00566503685343505	ENSMUSG00000087651
Ctsc	2776.06438662729	-0.15631165565525	0.041911318322842	-3.72958097980084	0.000191798459184942	0.00567199145821489	ENSMUSG00000030560
Tnfsf15	33.6763988604511	1.14395356038955	0.306812905081735	3.72850535763741	0.000192618814535909	0.00568641346608342	ENSMUSG00000050395
Insyn1	31.5523299531317	0.896770908600794	0.241089538600215	3.71965915156467	0.000199491811438973	0.00587916126366614	ENSMUSG00000066607
Erg28	1475.37442406542	-0.401691739638402	0.108080007728947	-3.71661464575207	0.000201910042905327	0.00593162700989274	ENSMUSG00000021252
Hr	4.20282233297761	2.90237267320928	0.780933125292803	3.71654445074418	0.000201966121790065	0.00593162700989274	ENSMUSG00000022096
Ifit1bl1	49.4101610024798	1.34967997841402	0.36350867839296	3.71292367593762	0.000204878687485885	0.00600684632109132	ENSMUSG00000079339
ENSMUSG00000085912	3.25749382012954	3.16481467833723	0.853768067015353	3.7068787187145	0.00020982936441173	0.00614146117446867	ENSMUSG00000085912
Akap8l	1554.93600272783	0.327970768404271	0.0885735381923925	3.7028075777201	0.000213226608840893	0.00623022636738013	ENSMUSG00000002625
Srsf7	9857.9505173499	-0.384767054004472	0.104123520055823	-3.69529433693935	0.000219632202807059	0.00640643898051375	ENSMUSG00000024097
Itm2c	486.228056308671	0.332539335899568	0.0902565066485026	3.68438075267658	0.000229259324122815	0.00667585967160353	ENSMUSG00000026223
Tysnd1	464.210985165462	-0.285492758524455	0.0775028552921406	-3.68364181485074	0.000229925270017142	0.00668386503469901	ENSMUSG00000020087
Lsp1	4749.81001175231	0.297505093045324	0.0809797809833241	3.67381943286051	0.000238951623512435	0.00693446536621061	ENSMUSG00000018819
Pbk	676.695458667568	-0.42261415542503	0.115171018147804	-3.66944880944502	0.000243074004711632	0.00704214230938292	ENSMUSG00000022033
Twnk	798.646383971184	-0.266829465153047	0.0727841305365595	-3.66603905529954	0.000246336320711467	0.00712457991526415	ENSMUSG00000025209
Fkbp10	5.82354917573765	2.43537713676764	0.665022027223124	3.66209995620272	0.000250156209577943	0.00722283799039827	ENSMUSG00000001555
Ogt	3043.18782049487	-0.236884949015714	0.0647031041198519	-3.66110640653226	0.000251128427096486	0.00723868162623986	ENSMUSG00000034160
Mtap	4260.25905542118	-0.325479067958638	0.0889228869667637	-3.66023955205471	0.000251979563243623	0.00725098766754754	ENSMUSG00000062937
Cdipt	793.932051434151	-0.212340873454077	0.0580630857541296	-3.65707179865091	0.000255112939379079	0.00732881592068335	ENSMUSG00000030682
Ifi214	666.493152381352	0.723324848914538	0.197864878190197	3.65565054056356	0.000256530615395068	0.00735717753179177	ENSMUSG00000070501
Mst1	5.83634283241217	2.17310952688877	0.594580694037477	3.65486055750037	0.00025732179831271	0.00736750669775402	ENSMUSG00000032591
Apol9b	4.16597039459089	3.20512824725942	0.878387959718255	3.64887543345593	0.000263390771781729	0.00752865963556037	ENSMUSG00000068246
AF357399	33.6046910888896	-0.760378052559481	0.208438692115996	-3.64796979313386	0.000264320705019444	0.00754262739715751	ENSMUSG00000077711
Tmem8b	25.0345663336386	0.912931007209552	0.250341596574115	3.64674117167449	0.000265587204105425	0.00756613679962339	ENSMUSG00000078716
Nid2	8.6606833528277	1.65087370279959	0.453034353066915	3.64403646571973	0.000268395368569864	0.0076334143676617	ENSMUSG00000021806
Fnbp1l	27.9271230780768	1.17919595658969	0.324072475968596	3.63867975231553	0.000274039321876235	0.00778098692496758	ENSMUSG00000039735
Helq	630.612455093099	-0.28855907469504	0.0793409508166121	-3.63695004565817	0.000275885409614259	0.00782041344367583	ENSMUSG00000035266
Foxred2	375.396652953932	-0.374708332730698	0.103059194490423	-3.63585543806591	0.000277059681192413	0.00784069723612899	ENSMUSG00000016552
1110012L19Rik	203.581190001941	0.536815222273097	0.147808910780092	3.63181907937716	0.000281430404757181	0.00795122298928017	ENSMUSG00000045237
Pcgf6	851.352401625514	-0.261440004959417	0.0720121191979727	-3.63050008625183	0.000282872610220105	0.00797878139685191	ENSMUSG00000025050
Commd3	2487.58708880865	0.552366469677708	0.152509816309185	3.62184207577753	0.000292512681247965	0.00823709927606502	ENSMUSG00000051154
Fam160a1	42.9783506772132	0.805302402325071	0.22250381131975	3.61927464320064	0.000295429962886568	0.00830556637437517	ENSMUSG00000051000
Igtp	1226.37621428715	0.629928855098216	0.174201796792883	3.61608701342598	0.00029908987589674	0.00839465229672082	ENSMUSG00000078853
Etfdh	761.433834630359	0.341403253408436	0.0944758299933661	3.61365709549637	0.00030190829011559	0.00845986623433734	ENSMUSG00000027809
Rrm2	8144.24172833855	-0.294387086551985	0.081533839881653	-3.61061231728188	0.000305474980398006	0.00854580006537334	ENSMUSG00000020649
Plcd1	148.211440271211	-0.486671852924334	0.134872356094951	-3.60838845716993	0.000308104929142983	0.00860529012065524	ENSMUSG00000010660
Hspa1b	117.455988832909	0.787003545261788	0.21820738327444	3.60667697605801	0.000310143356046985	0.00864809198191046	ENSMUSG00000090877
Cercam	49.1688840372444	0.866746362739632	0.240463485796517	3.6044822350828	0.000312775840927441	0.00870729226217061	ENSMUSG00000039787
Parp12	162.687088120598	0.660220819317542	0.18322350904672	3.60336303322951	0.00031412630889607	0.00873066828936671	ENSMUSG00000038507
Efnb2	28.9520839345967	0.875886963629926	0.243272039123015	3.60044239686345	0.000317676204244836	0.00881499895967042	ENSMUSG00000001300
Iqsec2	27.5331310847022	1.08819911719573	0.302302599364004	3.5997014894517	0.000318582695033794	0.00882582496955047	ENSMUSG00000041115
Cdc25a	2540.93429794711	-0.290184019268646	0.0806837765614841	-3.59655970054296	0.000322453603805817	0.0089186075240337	ENSMUSG00000032477
Eif5a	28650.3453494687	-0.281653884079461	0.0784089830950353	-3.59211244632625	0.000328008249947448	0.00905758484063285	ENSMUSG00000078812
Socs3	2180.98803635387	-0.418770871258997	0.116648141698118	-3.59003465604076	0.000330633999521918	0.00911536605456154	ENSMUSG00000053113
Susd6	280.026491282158	0.696430432769899	0.194039770330435	3.58911181756159	0.000331806507800123	0.00913296076944847	ENSMUSG00000021133
Ifi203	4022.21847803089	0.366374573292527	0.102093402451186	3.5886214436599	0.000332431132109501	0.00913544267065546	ENSMUSG00000039997
Atp1b1	66.4659460405244	0.784976851092965	0.219046976055512	3.58360049167733	0.000338890296782726	0.00926800715975429	ENSMUSG00000026576
Rgs19	1111.31014166611	-0.207618616148794	0.0579424010482352	-3.58318972622412	0.000339423885918574	0.00926800715975429	ENSMUSG00000002458
Marcks	3690.98813240866	0.629614149978348	0.175693863027791	3.58358646755213	0.000338908501338636	0.00926800715975429	ENSMUSG00000069662
Dnal1	41.823829049447	0.616327585224326	0.171949768533754	3.58434669892179	0.000337922972097616	0.00926800715975429	ENSMUSG00000042523
Espn	20.42771979813	1.16077429040053	0.324186325021322	3.58057759013796	0.00034283551641906	0.00934623202894895	ENSMUSG00000028943
Lyl1	838.822507061878	-0.340692933361273	0.095191694444753	-3.57901952842119	0.000344885698928887	0.00938715167482719	ENSMUSG00000034041
Acat2	2678.91311802142	-0.41802983493735	0.116818081523639	-3.57846858538554	0.000345613400462973	0.00939200294771638	ENSMUSG00000023832
Aff1	1157.09933094896	0.690660322958964	0.193199546551044	3.57485478246964	0.00035042234005004	0.00947748268746098	ENSMUSG00000029313
Srsf2	13207.0519392401	-0.477485370266853	0.13354176781608	-3.57555076644235	0.000349491345561559	0.00947748268746098	ENSMUSG00000034120
Ahnak	87.5989531440427	0.996901103333327	0.278853958111379	3.57499355607191	0.000350236522296734	0.00947748268746098	ENSMUSG00000069833
Tnfrsf1b	693.933979831251	-0.266028401815781	0.0744462047193714	-3.57343134977247	0.000352333646356987	0.00948634797307101	ENSMUSG00000028599
Tk1	877.620788447543	-0.271967886639223	0.0761096166775532	-3.57337086312554	0.000352415080026917	0.00948634797307101	ENSMUSG00000025574
Cd70	4.62271804574678	2.26256242791626	0.633065439764988	3.57397874816257	0.000351597479323673	0.00948634797307101	ENSMUSG00000019489
Kif5c	46.0593370831445	0.915424935062375	0.25621049989511	3.57294074769434	0.000352994655811189	0.00948700888644757	ENSMUSG00000026764
Egr1	270.492923434382	0.7408587439051	0.207427004185753	3.57166004886063	0.000354725666680069	0.00951856486744494	ENSMUSG00000038418
Gm15987	989.592111846302	0.602806994855897	0.169008049972454	3.5667354007939	0.000361456119349928	0.00968396465211335	ENSMUSG00000085786
Armc9	202.513215381497	0.373008626217118	0.104689200159208	3.56300960987245	0.000366627252621333	0.00977488071700545	ENSMUSG00000062590
Casz1	408.776352641491	0.454858184914599	0.127674294855225	3.56264497431046	0.000367137039742438	0.00977488071700545	ENSMUSG00000028977
Prr7	34.0916944392243	0.793374967305988	0.222655241692555	3.5632440596278	0.000366299824408067	0.00977488071700545	ENSMUSG00000034686
Reep2	22.0544047194992	0.998016848585097	0.280119277446735	3.56282815549841	0.000366880856292704	0.00977488071700545	ENSMUSG00000038555
Gm12715	17194.3363484567	-0.255621404346604	0.0717682443180768	-3.56176198505972	0.00036837427002561	0.00979256826990319	ENSMUSG00000059195
Rab40c	158.479138463571	0.433347015502674	0.121761570050543	3.55898018827115	0.00037229761107576	0.00988149544428256	ENSMUSG00000025730
Vopp1	396.807736197975	0.651240082029071	0.183086824324875	3.5570013540324	0.000375112223494558	0.00994076470727517	ENSMUSG00000037788
St8sia1	3.88089836817278	2.76751707401857	0.779132183017644	3.5520507743625	0.000382241093316078	0.0101140046564268	ENSMUSG00000030283
Akap12	511.007545984767	0.88254907882334	0.248549242701984	3.55080172133751	0.000384059637293429	0.0101464163527923	ENSMUSG00000038587
Orai2	259.990626994913	0.65141628845725	0.183671685296011	3.54663424254755	0.000390185893954676	0.010292357230505	ENSMUSG00000039747
Gbp2b	1628.69626657355	0.373244943373783	0.105295940699347	3.54472300541494	0.000393025876712867	0.0103512963184176	ENSMUSG00000040264
Tbrg4	2047.06304726428	-0.304311749522153	0.0861168395716062	-3.53370782109483	0.000409773796173837	0.0107757899969222	ENSMUSG00000000384
Stard4	3000.41940764659	-0.288866495189891	0.0817714176906277	-3.53260960061598	0.000411479623773559	0.0108040264349638	ENSMUSG00000024378
Bcas1	32.6379330228639	0.88434419116173	0.250484357296512	3.53053659999567	0.000414717633411456	0.010872344337273	ENSMUSG00000013523
BC147527	274.251091277381	0.615422120667114	0.17451428066431	3.52648573127902	0.000421113855953732	0.0110231227256005	ENSMUSG00000094796
Tbc1d2	49.1434859670272	0.926694279382871	0.263163074872616	3.52136894521178	0.000429324825093366	0.0111337898129797	ENSMUSG00000039813
Mthfd2	6091.39534282407	-0.233342843786528	0.0662285421528963	-3.52329730054798	0.000426212973671205	0.0111337898129797	ENSMUSG00000005667
Pold1	2129.03753553382	-0.236213486336914	0.0670520351825915	-3.52283842979073	0.000426951553381054	0.0111337898129797	ENSMUSG00000038644
Cyb5b	5489.68711594368	-0.198180847542023	0.0562598392680285	-3.52259889328631	0.000427337576165193	0.0111337898129797	ENSMUSG00000031924
Pitpnc1	156.935683962774	0.475905067892867	0.135123211777833	3.52200825921264	0.000428290799772666	0.0111337898129797	ENSMUSG00000040430
Gm6478	9.29095041320765	1.78995772939009	0.508302225754948	3.5214438156976	0.000429203609315452	0.0111337898129797	ENSMUSG00000074868
Otub1	1684.89279389744	-0.237168407405545	0.0673579999397011	-3.52101320730809	0.000429901203800772	0.0111337898129797	ENSMUSG00000024767
Pfas	1663.96373287109	-0.358517412709792	0.101937337217278	-3.51703725540345	0.000436392526574808	0.0112848070449973	ENSMUSG00000020899
Lzic	1541.11313950118	0.188405682572563	0.053577346065341	3.51651764054887	0.000437247602372957	0.0112898387724486	ENSMUSG00000028990
Hdac8	422.497102831632	0.358034158080154	0.101932009515199	3.51248013046155	0.000443945198101866	0.0114454830635825	ENSMUSG00000067567
Apbb2	25.3081971631022	0.98177580011764	0.279865660222655	3.50802524088364	0.000451446215050126	0.0116038648930102	ENSMUSG00000029207
Zfp54	128.526849047453	0.481661349112105	0.1373001706336	3.508089952761	0.000451336413501012	0.0116038648930102	ENSMUSG00000023882
Pdcd1	53.4819726996603	0.708014917812588	0.201898490561422	3.50678658291996	0.000453552751360504	0.0116056544595885	ENSMUSG00000026285
Rbm15b	1988.50578216875	-0.227742495105055	0.0649397339238772	-3.50698226407912	0.000453219355231314	0.0116056544595885	ENSMUSG00000074102
Slc22a12	3.51757830237107	3.31029383375475	0.943822207596878	3.50732776481631	0.000452631258989095	0.0116056544595885	ENSMUSG00000061742
Fndc10	71.1964449828222	0.687182716291856	0.195985426405387	3.50629497761966	0.000454391344855412	0.0116097328215449	ENSMUSG00000074738
Ppm1k	488.088181299639	0.278041797599528	0.0793185256398794	3.50538282647724	0.000455951150985411	0.0116152811580055	ENSMUSG00000037826
Ddx39b	5332.73009660585	-0.259877999700183	0.0741370410042039	-3.50537324096125	0.000455967569006123	0.0116152811580055	ENSMUSG00000019432
Qsox1	177.662046079559	0.557446388156226	0.159098894580748	3.50377285540036	0.000458716449075107	0.0116505798871334	ENSMUSG00000033684
Heca	1618.99052528445	0.225692196224388	0.0644098038397592	3.50400378156518	0.000458318849540673	0.0116505798871334	ENSMUSG00000039879
Ctso	330.907248876991	0.298522172892924	0.0852227464324136	3.50284619294297	0.000460315179156933	0.0116738388090941	ENSMUSG00000028015
Rxylt1	1043.02173648622	0.283564039341253	0.0809829255784751	3.5015287150434	0.000462597118079927	0.0117143296879114	ENSMUSG00000034620
Cd72	2322.5752777297	0.353646019685058	0.101074326192288	3.49887091022766	0.000467232730865557	0.0118142145986464	ENSMUSG00000028459
Ift81	59.737168830329	0.641022731918947	0.183247846617994	3.49811877055914	0.000468552422203392	0.0118300835343022	ENSMUSG00000029469
Fgd3	521.763100896699	0.581814719670278	0.166400805805007	3.49646575841746	0.000471464997808651	0.0118860637279399	ENSMUSG00000037946
Eif2b1	1139.7647695307	-0.275993074870819	0.0789967531273137	-3.49372681717716	0.000476328164647648	0.0119557669872573	ENSMUSG00000029388
Fam168a	241.327043443032	0.414082942250537	0.118517854435043	3.49384440196297	0.000476118427588964	0.0119557669872573	ENSMUSG00000029461
Cep290	314.627557496994	0.516346094548892	0.147780088772646	3.49401667597636	0.000475811296411358	0.0119557669872573	ENSMUSG00000019971
Slc1a2	98.9029017891997	0.535306479069345	0.153279262390797	3.49236074547738	0.000478771164218985	0.0119818967935507	ENSMUSG00000005089
Sipa1	2062.04017918024	-0.266582849690381	0.0763246568923494	-3.49274874653386	0.000478076101049916	0.0119818967935507	ENSMUSG00000056917
Gm37795	212.711097388916	0.721151964217654	0.206663522187306	3.48949808164041	0.000483928531661023	0.0120932608065524	ENSMUSG00000102813
Eef1aknmt	699.910335289619	-0.342202653277484	0.0980927854531674	-3.48856087322409	0.00048562823103394	0.0121180194935228	ENSMUSG00000026694
Uba2	7705.06051440394	-0.223318629566356	0.0640938631956394	-3.4842435520652	0.000493530164746982	0.0122972465102335	ENSMUSG00000052997
Cyp4f16	63.0961097024538	0.615399728136986	0.176722711622105	3.48228998122736	0.0004971450167308	0.0123692864206398	ENSMUSG00000048440
2700038G22Rik	174.610068287629	-0.552509528521924	0.158787390951942	-3.47955543075297	0.000502246457530089	0.0124780504339561	ENSMUSG00000097180
Aldh16a1	586.735657584602	-0.278491142202064	0.0801081318922425	-3.4764403516072	0.000508117242245247	0.0125992837055452	ENSMUSG00000007833
Cd274	311.109100866655	0.323567966175074	0.0930813287703785	3.47618550840933	0.000508600348495069	0.0125992837055452	ENSMUSG00000016496
Gm16170	13.2106761378216	1.85791118893299	0.534882075967603	3.47349681810149	0.000513723454556892	0.0127077785944153	ENSMUSG00000086245
Gm47283	17751.7255078552	-0.651871897720772	0.187706645840138	-3.47282268458382	0.000515015488551196	0.0127213291124358	ENSMUSG00000096768
Cd83	11963.5034988957	0.226729698246455	0.0653008386195383	3.4720794256173	0.000516443517680798	0.0127381948740518	ENSMUSG00000015396
Tesc	6.48502514089505	1.83670626502123	0.529128132880054	3.47119374474383	0.000518150002198162	0.0127618702990968	ENSMUSG00000029359
Rad51d	419.69943021579	0.319484104589957	0.0920810706579213	3.46959589313239	0.000521241961553751	0.0128195523004867	ENSMUSG00000018841
Rilpl1	210.878419302377	0.559382356501137	0.16127774024772	3.46844118501371	0.000523487100314482	0.0128562715598785	ENSMUSG00000029392
Gm26982	44.3788605077118	-0.647055984728995	0.18662976947981	-3.46705665731959	0.000526190966267116	0.0129041351311389	ENSMUSG00000097994
Ndnf	11.1253690789226	1.66597444776775	0.481256657603526	3.46171719693951	0.000536740832712685	0.0131439986440658	ENSMUSG00000049001
Gm2427	279.80324158569	0.313594439363501	0.0906796370044111	3.45826747573158	0.000543661341571123	0.0132684272774357	ENSMUSG00000101751
Eif2b3	1178.68226904739	-0.376925592011899	0.109022738886411	-3.45731171186786	0.000545593360445216	0.0132684272774357	ENSMUSG00000028683
Hs3st1	72.2923942289104	-0.574371411055751	0.166190148858031	-3.45610985369783	0.000548031922884784	0.0132684272774357	ENSMUSG00000051022
ENSMUSG00000109771	174.375485039743	-0.423385694294894	0.122446743813972	-3.45771297061297	0.000544781462479895	0.0132684272774357	ENSMUSG00000109771
2900026A02Rik	10.8245098573411	1.31247071822917	0.379698124905855	3.4566162752439	0.00054700316167951	0.0132684272774357	ENSMUSG00000051339
Ppp1r15a	1962.09699799825	0.381340744845226	0.110272851300732	3.45815620388056	0.000543885942613411	0.0132684272774357	ENSMUSG00000040435
Ano10	291.572539138064	0.503162026703743	0.145577582934716	3.45631529635566	0.0005476143628953	0.0132684272774357	ENSMUSG00000037949
Etv5	233.415042748837	0.520112317667773	0.15048127683158	3.45632578762531	0.000547593047458736	0.0132684272774357	ENSMUSG00000013089
Kcnab2	1562.20788806111	-0.46704504056066	0.135439909454313	-3.44835611927374	0.000564009871620796	0.0136359557788038	ENSMUSG00000028931
Mapkbp1	299.089289848336	0.400716970801754	0.116244428946133	3.44719290579889	0.00056644396998787	0.0136734797574386	ENSMUSG00000033902
Ankle1	196.778662211132	-0.644962952271112	0.187116588600005	-3.44685074207844	0.000567161829288243	0.0136734797574386	ENSMUSG00000046295
Mars2	541.313694354056	-0.299391539451055	0.0868720027470619	-3.44635244939349	0.000568208762463835	0.0136794258828089	ENSMUSG00000046994
Nob1	1870.16313739749	-0.239411156944341	0.0694823147773343	-3.44564163861793	0.000569705319736389	0.0136961645995135	ENSMUSG00000003848
Cops7a	1272.80871715059	-0.268846954483445	0.0780353645407199	-3.44519380495951	0.000570650082869859	0.0136996093630541	ENSMUSG00000030127
Jun	2139.39103514594	0.284978240000703	0.0828526615634962	3.43957857989032	0.000582620621332191	0.0139673692572667	ENSMUSG00000052684
Slc10a1	11.8404055552862	1.38211263596932	0.40213696888177	3.43692011160422	0.000588369115610731	0.0140854247803	ENSMUSG00000021135
Gorasp2	2295.19587526887	-0.204410160326281	0.0596213256569658	-3.42847392395071	0.000606984842315048	0.0145107579156519	ENSMUSG00000014959
Cdc14a	566.879775679232	0.286446221857891	0.0835739656192227	3.42745757887078	0.000609261487000171	0.0145245559237014	ENSMUSG00000033502
Arl13b	429.895662195205	0.39976056510066	0.116621954760428	3.42783282892037	0.000608419991412536	0.0145245559237014	ENSMUSG00000022911
Cds1	23.0489621365359	1.26826598844619	0.370420475747758	3.42385497423157	0.000617395597268725	0.0146979706742539	ENSMUSG00000029330
Lap3	3188.47519491519	-0.382610367600661	0.111766117212977	-3.42331269208874	0.00061862869819135	0.0147068433076283	ENSMUSG00000039682
Nbr1	1156.96208342854	0.268467592035964	0.0784504654150821	3.42212873582712	0.000621328875940509	0.0147505201061821	ENSMUSG00000017119
Cd93	359.45368539448	0.782520874127763	0.228702062377062	3.42157331680558	0.000622599361788124	0.014760181540977	ENSMUSG00000027435
Polh	1153.82896688493	-0.277050029484181	0.0810806035274637	-3.41697048900651	0.000633221433197081	0.0149912104676423	ENSMUSG00000023953
Wdr18	1344.5751835676	-0.355173933692243	0.104011784277196	-3.4147470516003	0.000638412685367441	0.0150932061286109	ENSMUSG00000035754
Alas1	1354.51586208812	-0.212727250027034	0.0623256074167203	-3.4131596761617	0.000642143058426426	0.0151604299691753	ENSMUSG00000032786
Cysltr2	18.3204178658184	1.30865119295082	0.383688331216717	3.41071407827533	0.00064792997483902	0.0152759545654115	ENSMUSG00000033470
Impa2	733.485409088139	-0.27689905253281	0.0812103498670037	-3.40965225474686	0.00065045759332887	0.0153144237503724	ENSMUSG00000024525
B3glct	87.5081020535161	-0.508279654182284	0.149088086973687	-3.40925733571183	0.000651400015900949	0.0153155164673933	ENSMUSG00000051950
Nop2	5471.82731196475	-0.295314332950355	0.0866627874138331	-3.4076255999033	0.000655307418459265	0.0153862221205003	ENSMUSG00000038279
Rae1	1692.88080184627	-0.261231781808602	0.0766872497471006	-3.40645651878367	0.000658120324740985	0.0154310709338788	ENSMUSG00000027509
Ms4a4c	819.665290005174	0.456348607355827	0.13406040452353	3.40405214334356	0.00066394077793182	0.0155462187906693	ENSMUSG00000024675
Nupr1	105.654408477582	0.676337547400084	0.198722408331588	3.40342869774178	0.00066545779493443	0.0155604241981042	ENSMUSG00000030717
Trap1	3124.77492656594	-0.245642791808189	0.072218084105947	-3.40140277673138	0.000670409706751433	0.0156547993408501	ENSMUSG00000005981
Btrc	347.97881001653	0.298472610786879	0.0878158618640042	3.39884622722382	0.00067670751697003	0.0157803023022766	ENSMUSG00000025217
Cdk2ap2	758.465962382713	-0.312924551031375	0.0920857587951774	-3.39818615957111	0.00067834243883525	0.0157898161060705	ENSMUSG00000024856
mt-Rnr2	44691.8177885966	0.622891515957136	0.183314669794501	3.39793600073256	0.000678963016320237	0.0157898161060705	ENSMUSG00000064339
Zbtb42	34.370318741738	0.812563116117391	0.239162155596437	3.39754052680689	0.000679945158612218	0.0157911720056503	ENSMUSG00000037638
Cpm	213.878928511397	0.443065241025752	0.130574149525644	3.39320794073974	0.000690791780397363	0.0160213078729065	ENSMUSG00000020183
ENSMUSG00000110605	612.338823625965	-0.266823382233656	0.0786767460578853	-3.39138812422853	0.000695395470065143	0.0161062259753706	ENSMUSG00000110605
Kdm7a	482.602109481629	0.303069323231943	0.0893941755519543	3.39025804937151	0.000698268616527581	0.0161508869584654	ENSMUSG00000042599
Nod2	92.8604147075754	0.502733062419662	0.148393206998772	3.38784417822995	0.000704442724954018	0.0162716749968095	ENSMUSG00000055994
Gmpr	7.75441969796591	1.62665078201739	0.480936127378085	3.38225949230595	0.000718921991736308	0.0165837160657877	ENSMUSG00000000253
Gm16341	59.7539084313148	0.666745573882459	0.197224075332196	3.38065001830746	0.000723145872585921	0.0166586690028452	ENSMUSG00000087538
Pigm	1026.92604991228	-0.258457228047169	0.0765994308584564	-3.37414031867622	0.000740466126353469	0.0170137036663779	ENSMUSG00000050229
Pcyt2	1408.13620375582	-0.33269093586643	0.098601102405849	-3.3741096980544	0.00074054850101124	0.0170137036663779	ENSMUSG00000025137
Naa20	1407.00251022206	0.258656737837201	0.0767277273617986	3.37109864622397	0.00074869043593633	0.0171637227521674	ENSMUSG00000002728
Myh14	8.18459170420497	1.84933637163234	0.548609374839598	3.37095291558415	0.000749086595279758	0.0171637227521674	ENSMUSG00000030739
Arhgap31	37.1431508301718	1.030941642664	0.305979429368874	3.36931683541754	0.000753547554347852	0.017242822418297	ENSMUSG00000022799
Rdh11	1862.68078576771	-0.337984195314471	0.100346703447025	-3.3681644110302	0.000756704565341653	0.0172779695348839	ENSMUSG00000066441
ENSMUSG00000004791	16.5728038864985	1.0363360406735	0.307699035961991	3.36801848414474	0.000757105199884635	0.0172779695348839	ENSMUSG00000004791
Csf1	218.670341812885	0.55454030322676	0.164823845598019	3.36444220928567	0.000766985449488475	0.0174801097174753	ENSMUSG00000014599
5430403G16Rik	79.0909554525045	0.531945028454592	0.15814526662274	3.36364811805314	0.000769195482259414	0.0175071349910255	ENSMUSG00000072763
Wdr89	398.143937309526	-0.4112956010131	0.122316786786386	-3.36254419216707	0.000772277638373241	0.0175539117988215	ENSMUSG00000045690
Mrpl4	949.531931596703	-0.211749794965203	0.0629832734706963	-3.36200046927891	0.00077379992091644	0.0175651554425295	ENSMUSG00000003299
Gas2l1	22.1683371613229	1.16643737307211	0.347254074966732	3.35903149065669	0.000782161538309342	0.0177314153505591	ENSMUSG00000034201
Slamf7	2072.64782373527	0.480264497285814	0.143004909065128	3.35837769783897	0.00078401406606992	0.0177498707699777	ENSMUSG00000038179
Tube1	465.877408017105	0.218405732738135	0.0650711405732382	3.35641469957511	0.000789600739342949	0.0178527056052765	ENSMUSG00000019845
Sfxn1	2773.50095352918	-0.257445383679288	0.0767270010289001	-3.35534271152235	0.000792667182754903	0.0178983621596163	ENSMUSG00000021474
Zfp52	677.801810150557	0.288673865795313	0.0860437520291528	3.35496603748179	0.000793747287982317	0.0178991060600023	ENSMUSG00000051341
ENSMUSG00000048281	4.48559243199881	2.11913259746689	0.631753586850211	3.35436575521863	0.000795471408622045	0.0179143514987834	ENSMUSG00000048281
Polr3e	1265.76729550196	-0.276731217667166	0.0825104537486022	-3.35389281108946	0.000796832238040267	0.0179213861116083	ENSMUSG00000030880
Pgam1	16298.400761517	-0.379066078124179	0.113093192712299	-3.35180278346634	0.000802871905156585	0.0180334947106984	ENSMUSG00000011752
Secisbp2	1330.25336021488	-0.188771423412128	0.0563350772862017	-3.35086827791331	0.000805586117149264	0.0180707132551606	ENSMUSG00000035139
Kpnb1	29417.2951906298	-0.21221856476173	0.0633657224914222	-3.34910668446112	0.000810725720750221	0.0181621687349719	ENSMUSG00000001440
2410002F23Rik	1102.67951190429	-0.489747583930233	0.146294821815855	-3.34767545324804	0.000814923847798438	0.0182323211131135	ENSMUSG00000045411
Gm10254	621.168295833156	-0.213889818792454	0.0640458440393134	-3.33963619342984	0.000838882061665411	0.0187438053333946	ENSMUSG00000069011
Rmdn3	1021.49647298164	-0.253794416285435	0.0760687029196537	-3.33638417041896	0.000848757884929468	0.0189397108708869	ENSMUSG00000070730
Bzw2	4771.42989716023	-0.404510302948804	0.121361460232538	-3.33310345948155	0.000858829997340573	0.0191394799798467	ENSMUSG00000020547
Nme4	144.986204159493	0.553899720701467	0.166464726352079	3.32742997774765	0.00087651014206356	0.019493277483077	ENSMUSG00000024177
Zbtb33	760.950010109269	0.605157561471927	0.181877635340384	3.3272785867233	0.000876986508189681	0.019493277483077	ENSMUSG00000048047
Trim11	905.98321500472	0.309792101299411	0.0932064658026682	3.32371899987374	0.000888256488820549	0.0197181404719606	ENSMUSG00000020455
Hbp1	162.275552063987	0.557273139741276	0.167704223756745	3.32295232199757	0.000890701367911086	0.0197467684587603	ENSMUSG00000002996
Ccdc150	19.1027190993108	0.911531458973675	0.274397267428368	3.32194073037419	0.000893936804413024	0.0197672209545043	ENSMUSG00000025983
Kpna3	3612.30228018459	-0.225781182933567	0.0679600724363521	-3.32226224663051	0.000892907299883706	0.0197672209545043	ENSMUSG00000021929
Naf1	1369.79422311358	-0.281919994667465	0.0849218649839685	-3.3197574584671	0.000900956860379857	0.0198710395025457	ENSMUSG00000014907
Pdcd4	1511.12376795912	0.427168049212878	0.128670752036219	3.31985352112215	0.000900646910588652	0.0198710395025457	ENSMUSG00000024975
Epsti1	2993.74999738883	0.28835431311012	0.0869923560878748	3.31470862588019	0.000917386944785507	0.0202073389783746	ENSMUSG00000022014
Ifi208	339.063990347148	0.968544966446113	0.292559706325971	3.31058907123374	0.000930998170111289	0.0204477917138929	ENSMUSG00000066677
Lrp11	32.5871697308701	0.748007782474721	0.225962344455263	3.3103205061798	0.000931891987662935	0.0204477917138929	ENSMUSG00000019796
Klhl22	161.503962831571	0.610078370654309	0.184291733154715	3.31039466725369	0.000931645091055759	0.0204477917138929	ENSMUSG00000022750
Zfp36l1-ps	5.46502758354256	1.65504823000199	0.500496099124944	3.30681544350822	0.000943630397968125	0.0206788133236784	ENSMUSG00000080942
Nol4l	12.6477795241412	1.46507638060296	0.443183573989016	3.30580027462677	0.000947055678952751	0.0207273018186164	ENSMUSG00000061411
Aldh4a1	152.113267824063	0.854022732204498	0.258384960228654	3.30523390931401	0.000948971653617138	0.0207426757995879	ENSMUSG00000028737
Mab21l2	3.21059759340717	2.4728290417618	0.74837369879189	3.30427037421775	0.00095223947848282	0.0207875215909411	ENSMUSG00000057777
Oas1g	314.331696587553	0.651127724777248	0.197162296225941	3.30249615287032	0.000958284024512042	0.0208762659487979	ENSMUSG00000066861
Trafd1	1958.83295770111	0.587259461411696	0.177830205848357	3.3023605782275	0.000958747368502096	0.0208762659487979	ENSMUSG00000042726
Prkd2	1926.16752477736	0.285252937237041	0.0864231987287226	3.30065238770476	0.000964603136967441	0.0209770501529064	ENSMUSG00000041187
0610012G03Rik	381.90433518052	-0.537808636563383	0.163083430316744	-3.29775155893422	0.000974623276698967	0.0211680249918875	ENSMUSG00000107002
Dmwd	112.050967651297	0.766747473193971	0.232590070865596	3.29656150127339	0.000978761827494901	0.0212309339052923	ENSMUSG00000030410
Dnm3	18.3104464508175	1.36621084250192	0.414560196348503	3.29556685503257	0.0009822332923655	0.0212792315163542	ENSMUSG00000040265
Rcc2	13485.0878913917	-0.200177172221605	0.0607595691137689	-3.29457853538731	0.000985693965744018	0.0213271733626108	ENSMUSG00000040945
Zfp874b	82.9683143574929	0.482507203435319	0.14664539329993	3.29029908528022	0.00100080944442264	0.0216268468186045	ENSMUSG00000059839
Gm36981	11.2596726233874	1.29807820812409	0.394625323808626	3.28939409056677	0.00100403334762053	0.0216691187006032	ENSMUSG00000103261
Taf5l	1157.69225102289	-0.316685828637129	0.0963613070553075	-3.28644181274299	0.00101461733544852	0.0218699295268871	ENSMUSG00000038697
Map3k7	2286.7785473111	0.197090174122967	0.0600587528307059	3.28162282487828	0.00103211562573406	0.0222110910145518	ENSMUSG00000028284
Ddr1	5.70325586616008	1.76801985107947	0.538805502612711	3.28136932994596	0.00103304378146427	0.0222110910145518	ENSMUSG00000003534
Ahcy	10673.0282069821	-0.24819316472194	0.0756481446388742	-3.28088898818013	0.00103480464146184	0.0222209996689789	ENSMUSG00000027597
ENSMUSG00000030088	12.6107291537574	1.34519448051794	0.410482056750105	3.277109092583	0.00104875839813795	0.0224411535527419	ENSMUSG00000030088
Txnrd2	234.01120541711	-0.287533724651364	0.0877412719093189	-3.2770635573705	0.00104892755094065	0.0224411535527419	ENSMUSG00000075704
Ypel5	530.891692359647	0.777447584082838	0.237240418297789	3.27704524237928	0.00104899559402333	0.0224411535527419	ENSMUSG00000039770
Lactb	873.468404276575	0.435346408519982	0.132901225394329	3.27571402918426	0.00105395221170648	0.0225190064433736	ENSMUSG00000032370
Grwd1	1852.69702433792	-0.340269356848301	0.103947927210547	-3.27345975989577	0.00106239516530626	0.0226710618733831	ENSMUSG00000053801
Rnps1	7665.55057858705	-0.200277629617334	0.0611999559210985	-3.27251264487086	0.00106596104298978	0.0227187931519007	ENSMUSG00000034681
Pced1a	446.845644172971	-0.289041889296472	0.0883440623824226	-3.27177493882125	0.00106874616535233	0.0227497860577427	ENSMUSG00000037773
Paqr8	72.910446392728	0.539611523726079	0.165045004900933	3.26948109729207	0.00107744936011012	0.0229065197914954	ENSMUSG00000025931
Elp1	1922.22710726315	-0.311732957528025	0.0953973578215642	-3.2677315666447	0.00108413137141074	0.023019947244129	ENSMUSG00000028431
D030028A08Rik	253.14023864527	-0.362776150364251	0.111069161481525	-3.26621850318547	0.00108994112574236	0.0231145951145338	ENSMUSG00000078700
Rgl1	143.070912209699	0.476118754049304	0.145867136609733	3.26405772482638	0.00109828786422987	0.0232627440685021	ENSMUSG00000026482
Prdm16	269.21136295715	-0.504222743899307	0.154746665634299	-3.25837549928797	0.00112052031504328	0.0237042744369242	ENSMUSG00000039410
Osbpl3	54.5171385942926	0.610513202045564	0.187395650331288	3.25788352593171	0.00112246466818137	0.0237160550966925	ENSMUSG00000029822
Nolc1	19747.4726751075	-0.254412874495179	0.0781842349149106	-3.25401757492493	0.001137852400969	0.0240114951725471	ENSMUSG00000015176
Nxt1	808.858687078645	-0.352051854569635	0.108207383734677	-3.25349197456675	0.00113995945302191	0.0240262970783028	ENSMUSG00000036992
Mid2	3.36413146377344	2.84807164731228	0.875532688738213	3.25295866613138	0.00114210109154967	0.0240417905884957	ENSMUSG00000000266
Dnah12	48.1769282913241	0.616455830658323	0.18954192810416	3.25234546690671	0.00114456814856165	0.0240640877778159	ENSMUSG00000021879
Uck2	3215.60398803655	-0.289293665208476	0.0889747887614189	-3.25141165531959	0.00114833457477613	0.0241136153398629	ENSMUSG00000026558
Atad2	4338.80773967371	-0.252120498541059	0.0775858437443773	-3.24956830232746	0.00115580318490217	0.0242109605876628	ENSMUSG00000022360
ENSMUSG00000033855	14.5594803003358	1.42991109430887	0.440014215770701	3.24969294867969	0.00115529675046275	0.0242109605876628	ENSMUSG00000033855
Lipt2	77.9271058557145	-0.483705265426589	0.148897417851121	-3.24858061615438	0.00115982338478567	0.0242654358826701	ENSMUSG00000030725
Trappc13	907.41259752359	-0.280812107695008	0.0864683205471474	-3.24757212720344	0.00116394158981247	0.0243218259103479	ENSMUSG00000021711
Nckap5l	29.6413730820135	0.944875756257326	0.29105252896196	3.24640971039568	0.00116870512816243	0.0243915467102326	ENSMUSG00000023009
Nup85	3186.99007209401	-0.28999075844498	0.0893704039718308	-3.24481870459469	0.00117525421440804	0.0244983174230202	ENSMUSG00000020739
BC035044	2038.2884655945	0.220140041293365	0.0679623945315775	3.23914486549	0.00119888663953899	0.0249604985744702	ENSMUSG00000090164
Yars2	715.201729469672	-0.448502536225756	0.138548796582946	-3.2371449430616	0.00120732073682813	0.0251055150299309	ENSMUSG00000022792
Rnf145	1859.00753325923	-0.253041898257549	0.0782186159819	-3.23505977549006	0.00121617266780407	0.0252588571212332	ENSMUSG00000019189
Cc2d1b	1951.65667738195	-0.229148576130865	0.0708542611748513	-3.23408320588343	0.00122033896920789	0.0253146286415904	ENSMUSG00000028582
Zfp870	457.437562780417	0.319699928548712	0.0988715420264427	3.23348783680556	0.00122288543364078	0.0253367038996629	ENSMUSG00000095325
Amigo2	418.395674817412	0.53728590350506	0.166248840480125	3.23181744879173	0.0012300561059238	0.0254544176980091	ENSMUSG00000048218
Cbfa2t3	296.453637743121	0.323222691485705	0.100050101851095	3.23060832028694	0.00123527088124819	0.0255314210074671	ENSMUSG00000006362
Xlr3c	48.5709950263813	1.38170349503061	0.428500953698055	3.22450506377225	0.00126190624842535	0.0260504390148967	ENSMUSG00000058147
Kcnn4	665.316799493489	-0.213051155766198	0.066090093157358	-3.22364738174798	0.00126569148587736	0.0260656199615682	ENSMUSG00000054342
Kifc5b	1254.83645319609	0.364465146118248	0.113054219433125	3.22380843409247	0.00126497990964317	0.0260656199615682	ENSMUSG00000024301
Ccdc102a	48.651665158765	0.648600197609728	0.201239861333135	3.22302049560661	0.00126846477185992	0.0260912976478961	ENSMUSG00000063605
Slc25a24	136.974599370636	0.654611038456074	0.203163613849261	3.22208798147176	0.00127260050819606	0.0261449044310039	ENSMUSG00000040322
Dhx58	1764.37116214391	0.362141966604611	0.112411644778445	3.2215698588733	0.00127490377818526	0.0261607806488843	ENSMUSG00000017830
Retreg2	1075.68966293812	-0.16787577089583	0.0521494645488665	-3.21912741287157	0.00128581338307931	0.0263214468945804	ENSMUSG00000049339
Lad1	2289.79588681324	0.537614748525782	0.167005484997548	3.21914426064314	0.00128573783535582	0.0263214468945804	ENSMUSG00000041782
Mmp15	4.51933623608757	2.84416033895478	0.884082507554208	3.2170756854166	0.00129504430453647	0.0264786989203851	ENSMUSG00000031790
Tmtc3	67.2981649335773	0.747861639226392	0.232502196371864	3.21657881472337	0.00129728895493092	0.026492903353207	ENSMUSG00000036676
Selenoi	1367.81938528812	-0.356669810750897	0.110947508975335	-3.21476177378791	0.0013055281842386	0.0266293475575065	ENSMUSG00000075703
Padi3	3.99860944821329	2.3643216661421	0.735552827353442	3.21434651355914	0.00130741791605724	0.0266361077940006	ENSMUSG00000025328
Esr1	23.999815171087	1.02851077508998	0.320183857922399	3.21225055430264	0.00131699461760643	0.0267992726175556	ENSMUSG00000019768
Golt1b	974.51484391687	-0.23226456530825	0.0723298683486485	-3.21118468222112	0.00132188951178527	0.0268668934898284	ENSMUSG00000030245
ENSMUSG00000117869	888.113016475565	-0.503402627498254	0.156794857906209	-3.2105812283677	0.00132466824094115	0.0268680708918556	ENSMUSG00000117869
Cpsf7	1890.23376128646	-0.156474892298955	0.0487386404271192	-3.21048947873173	0.00132509119299329	0.0268680708918556	ENSMUSG00000034820
Nsun5	635.522110583513	-0.284510443377145	0.0886618702896181	-3.20893798481556	0.00133226224253144	0.0269814674307938	ENSMUSG00000000916
Erdr1	10664.8994835637	-0.682501144025326	0.212760302092943	-3.20784064184671	0.00133735579325068	0.0270525710935311	ENSMUSG00000095562
Apobec1	1247.73275345374	0.288908599821818	0.0901032401794785	3.20641743012055	0.00134398869567587	0.0271546084813092	ENSMUSG00000040613
Riox1	578.035835989761	-0.309361224599928	0.0965121150087269	-3.2054133781231	0.00134868634075936	0.0272173502037778	ENSMUSG00000046791
Mthfd1	5622.41325483283	-0.284572414811769	0.0887927898191275	-3.20490453550844	0.00135107283523329	0.0272333584583049	ENSMUSG00000021048
Cfap45	12.7007568374542	1.18297884855849	0.369266590234526	3.20359025117102	0.00135725492399592	0.0272615257530697	ENSMUSG00000026546
Ddit4	2150.10930612653	0.585600013504257	0.182779287373145	3.203864190086	0.00135596423037086	0.0272615257530697	ENSMUSG00000020108
Gm6741	675.55373211833	-0.323295183716663	0.100902944434705	-3.20402130510541	0.00135522447650601	0.0272615257530697	ENSMUSG00000043346
Blcap	195.212900495034	0.386449334088181	0.120759939581333	3.20014514273506	0.00137358397036227	0.0275571253584535	ENSMUSG00000067787
A930024E05Rik	28.3992766305578	0.837080745099117	0.261616365305408	3.19964977772671	0.00137594673347646	0.0275721659030635	ENSMUSG00000056735
Sgsm2	89.3033372788082	0.717607810996526	0.224347207565396	3.19864828621657	0.00138073504307435	0.0276357190764284	ENSMUSG00000038351
Aurkb	2140.85810546323	-0.210436569913914	0.0658470545411507	-3.19583877183759	0.0013942499800587	0.0278735846890567	ENSMUSG00000020897
Nans	3040.82482066136	-0.190475326608162	0.0596217885122749	-3.19472681650514	0.00139963256300129	0.0279485039712395	ENSMUSG00000028334
Sesn3	830.110064302976	0.181737090499955	0.0569031098522563	3.19379891488916	0.00140413886589501	0.0280057708690121	ENSMUSG00000032009
Thoc6	985.976427323407	-0.220265942352779	0.0690104860635961	-3.19177497387564	0.00141401447378063	0.0281698710959584	ENSMUSG00000041319
Dxo	254.25601908072	-0.276936119132428	0.0867765296693932	-3.19137121739619	0.00141599220674239	0.0281764316529076	ENSMUSG00000040482
Hpdl	46.3663296880369	-0.802251819537327	0.25148998221948	-3.18999513402958	0.00142275189254903	0.0282780210457449	ENSMUSG00000043155
Fam129a	1299.62610254359	0.580066329943003	0.181891978371671	3.1890704314498	0.00142731097523771	0.0283356869915658	ENSMUSG00000026483
Il7r	9.84085653836947	1.56951089224853	0.492362981990908	3.18771099708205	0.00143403788366265	0.0284362059691946	ENSMUSG00000003882
Ifit1bl2	36.6840239276643	0.877089924625828	0.275446120242232	3.18425223725968	0.00145128489973101	0.0287448583906166	ENSMUSG00000067297
ENSMUSG00000034818	6.62027800128245	2.07471216436282	0.651811826367654	3.18299251476389	0.0014576138239312	0.0288367975607129	ENSMUSG00000034818
Rap2b	401.912167064673	0.512903509966934	0.161256668305404	3.1806654283316	0.00146937219254862	0.0290022850891842	ENSMUSG00000036894
Herc6	1076.83518872312	0.287029965471555	0.0902336571769392	3.18096345035332	0.00146786147337024	0.0290022850891842	ENSMUSG00000029798
Ctps	3003.11251685912	-0.260280280249749	0.0818828680096882	-3.17869032407308	0.00147942056719845	0.0290980836584952	ENSMUSG00000028633
Mecr	690.052889267514	-0.230077503899172	0.0723884271221473	-3.17837412755139	0.00148103508938693	0.0290980836584952	ENSMUSG00000028910
Oit3	36.7450949673802	0.715001900070611	0.224931602491421	3.17875252810632	0.00147910313989831	0.0290980836584952	ENSMUSG00000009654
Rdh12	290.479479574894	0.254136690612434	0.0799332560230516	3.17936117276575	0.00147600053460995	0.0290980836584952	ENSMUSG00000021123
Ddx49	1193.35971255781	-0.236692569611267	0.0745927160013565	-3.17313247592383	0.00150803696836027	0.0295945762344226	ENSMUSG00000057788
Ccdc130	280.042085706597	0.247889365754899	0.0781869500642956	3.17046982330237	0.00152192639932215	0.0298325800855992	ENSMUSG00000004994
Gm22317	3.41476799627935	4.69236853821538	1.48017710386668	3.17013992849739	0.0015236554387602	0.0298325800855992	ENSMUSG00000096206
Nfkbiz	1935.10364513814	0.304733385156701	0.0961756800347707	3.16850772509776	0.00153223676994897	0.0299662735797915	ENSMUSG00000035356
Itgb7	93.8314033826033	-0.45897518420545	0.144893674989763	-3.16766887331609	0.00153666434130317	0.0300185183838802	ENSMUSG00000001281
Elovl6	335.804815039451	-0.428987335611821	0.13548944357877	-3.16620486645085	0.00154441980252278	0.0301106845070022	ENSMUSG00000041220
Ubald2	5594.03460201567	0.382164469222372	0.120704605610989	3.16611339963301	0.00154490553516884	0.0301106845070022	ENSMUSG00000050628
Gm12185	61.6179385616966	0.792119787065486	0.250250997460693	3.16530121798977	0.00154922478409089	0.030131430112978	ENSMUSG00000048852
Gsdmd	912.846132375881	0.196180658338954	0.0619795071333041	3.16525037730638	0.00154949552853845	0.030131430112978	ENSMUSG00000022575
Ifi206	1882.37845809745	0.63003394648365	0.199107961432967	3.16428304498392	0.00155465522075955	0.0301805974738107	ENSMUSG00000037849
Iffo1	222.052388580806	0.597515423151411	0.188841270783638	3.16411460626106	0.00155555527844306	0.0301805974738107	ENSMUSG00000038271
Timm44	4960.32644948874	-0.170565436230275	0.0539212704740105	-3.16323103537565	0.00156028453305542	0.0302380312058008	ENSMUSG00000002949
Nipal3	166.662693557301	0.589159974695684	0.186485262957163	3.15928436034657	0.00158157092742713	0.0305812125141538	ENSMUSG00000028803
Rcl1	2289.47872810455	-0.296259137320123	0.0937650575732183	-3.1595899900001	0.00157991301185028	0.0305812125141538	ENSMUSG00000024785
Zfp91	1489.19969209122	-0.225115207325297	0.0712920736345144	-3.15764706858397	0.00159047987045441	0.03071872590472	ENSMUSG00000024695
Bckdk	561.895558572389	-0.252203046021552	0.0799060418034577	-3.15624501388628	0.00159814552044846	0.0308319428679746	ENSMUSG00000030802
Atic	8216.61387673062	-0.285356314975141	0.0906884401849528	-3.14655665477514	0.00165205251940905	0.0318360019326482	ENSMUSG00000026192
Rgs12	105.811015431545	1.02718041106896	0.326869312907468	3.14248040579981	0.00167522925229973	0.032216799791315	ENSMUSG00000029101
Slc44a2	1502.02263608005	-0.164064699946431	0.0522096889151705	-3.14241864595289	0.00167558269551741	0.032216799791315	ENSMUSG00000057193
Zscan29	737.796527049656	0.198359347555442	0.0631620165803546	3.14048471367423	0.00168668509617421	0.0323574728943948	ENSMUSG00000050619
Cd24a	5249.97701763224	-0.460291804852427	0.146563017509553	-3.14057265382399	0.00168617878057477	0.0323574728943948	ENSMUSG00000047139
Mrps27	1128.0246687681	-0.184220244908525	0.0586901073202332	-3.13886365726607	0.00169604341761578	0.0325005270597607	ENSMUSG00000041632
Ipo5	13656.6871684317	-0.221412850384898	0.0705492347538872	-3.13841604600394	0.00169863586871719	0.0325137546517166	ENSMUSG00000030662
Ntmt1	478.041199943946	-0.317291898649834	0.101162527966497	-3.13645679905225	0.00171002627992329	0.0326951668934327	ENSMUSG00000026857
Gm23472	10.6327998458731	3.23510613964311	1.03177917707218	3.13546368402508	0.0017158267107051	0.0327328414800026	ENSMUSG00000094050
Syna	3.69032072308648	2.2329585491753	0.712108893174614	3.13569816439262	0.00171445556500836	0.0327328414800026	ENSMUSG00000085957
Ctsb	1370.96010151289	0.181596809354665	0.0579359050731001	3.1344432977363	0.00172180526561216	0.0328102758139449	ENSMUSG00000021939
Dhrs3	713.000533377083	0.411117864718628	0.131221888437361	3.13299762421019	0.00173030842724937	0.0329355923685674	ENSMUSG00000066026
Plod2	257.320930273664	0.853258475521397	0.27244854268791	3.13181515710585	0.00173729215310007	0.0330317405705668	ENSMUSG00000032374
Camsap3	9.89388687116725	1.64067063263335	0.524158245811252	3.13010554683547	0.0017474350542637	0.0331508406021413	ENSMUSG00000044433
Nfyb	3587.29194686175	0.327490091259616	0.104622888094122	3.13019547849793	0.00174690014726943	0.0331508406021413	ENSMUSG00000020248
Bst1	18.2230736362702	1.30584733107095	0.417597463405673	3.12704804387757	0.00176571070335789	0.0334604135836989	ENSMUSG00000029082
AC125149.2	264.053801013994	-0.511415343938785	0.163644766721407	-3.12515550716896	0.0017771108609946	0.0336391538726253	ENSMUSG00000079794
Sc5d	1956.45961543275	-0.321339650318369	0.102899382559138	-3.12285304660298	0.00179107151385268	0.0338659130379247	ENSMUSG00000032018
Ccnd3	1671.5201734807	-0.32978073251462	0.105653687716883	-3.12133669577464	0.00180032067859756	0.0340031838223956	ENSMUSG00000034165
Mfsd6	192.988072500739	0.464808276945727	0.148968034439573	3.12018802352038	0.00180735634398077	0.0340983907148602	ENSMUSG00000041439
Sox4	73.7258313574692	1.34718529221406	0.432235504226823	3.11678536131336	0.00182834635454955	0.0344563663046476	ENSMUSG00000076431
Txnrd3	848.520814724094	-0.370542560199662	0.118902299057807	-3.11636161063222	0.00183097597318966	0.034467921045959	ENSMUSG00000000811
Mbd3	6235.93392966684	-0.317193678276328	0.10185862026541	-3.11405826477745	0.00184533045418408	0.0346617950037016	ENSMUSG00000035478
Ypel2	63.7268816916648	0.629271705615809	0.202068883692791	3.11414451406829	0.00184479108944878	0.0346617950037016	ENSMUSG00000018427
Stox1	9.08516395199857	1.69911266891796	0.545930363792507	3.11232490736446	0.00185620086308289	0.034827707302608	ENSMUSG00000036923
Txnip	1708.29133131398	0.428936610533558	0.137950302124022	3.10935607917646	0.00187495604627712	0.0351410347576916	ENSMUSG00000038393
Eri3	451.382285715731	-0.205217258916083	0.0660068890367165	-3.10902788952726	0.00187703999168674	0.0351415603262886	ENSMUSG00000033423
Zhx2	412.134662851014	0.398733364892189	0.128374768444577	3.10601039225504	0.00189630051111084	0.0354633092302162	ENSMUSG00000071757
Dimt1	567.480337933895	-0.302536691859625	0.0975064674147311	-3.10273461731338	0.00191741496719521	0.0358189880155931	ENSMUSG00000021692
Nelfa	1178.51938554187	-0.254017154875457	0.0819725176439463	-3.09880874927862	0.00194300401461524	0.0362573882334262	ENSMUSG00000029111
Thap6	137.709036844563	0.418915064638513	0.135238422955758	3.09760388714056	0.00195092003342188	0.0363654047233153	ENSMUSG00000102644
St3gal6	751.720656370687	0.343573508106146	0.111089384580049	3.09276632870869	0.00198300209368966	0.0369231533632215	ENSMUSG00000022747
Ip6k2	706.124833847797	0.254868066599132	0.0824278915380935	3.09201244679838	0.00198804513091926	0.0369365819813075	ENSMUSG00000032599
Pus7l	511.353343484209	-0.275891255727428	0.0892223064310798	-3.09217802994749	0.00198693646695369	0.0369365819813075	ENSMUSG00000033356
Brip1os	1364.56146550707	-0.184842882092193	0.0598195175487694	-3.09000957658167	0.00200150041744539	0.0371461961296352	ENSMUSG00000085208
ENSMUSG00000074903	23.1013116919509	0.813861622191622	0.263446530167199	3.08928579046038	0.00200638333727123	0.0371964320867431	ENSMUSG00000074903
Ppip5k2	2556.81663389577	-0.292038661987267	0.0945554118583753	-3.08854518475031	0.00201139104252149	0.037208557456515	ENSMUSG00000040648
4833407H14Rik	11.3609624552471	1.08889944490165	0.352551200972177	3.08862781320544	0.00201083177117908	0.037208557456515	ENSMUSG00000097779
Slc20a1	767.880909507889	-0.311586671835337	0.10096333352726	-3.08613692664188	0.00202775419980508	0.0374707054456953	ENSMUSG00000027397
Gm13803	57.0268432848218	0.498452305800129	0.161644753442775	3.08362811154642	0.0020449304332134	0.0376444390861921	ENSMUSG00000082820
Tmem19	287.972335032506	0.281670104301316	0.0913481926824898	3.08347758209461	0.00204596524372974	0.0376444390861921	ENSMUSG00000069520
Nle1	963.347249637933	-0.29958056599913	0.0971368787085464	-3.08410739548266	0.00204163880691327	0.0376444390861921	ENSMUSG00000020692
Wdr36	2543.85178996216	-0.232309757437906	0.0753362684851566	-3.08363769681104	0.00204486455584452	0.0376444390861921	ENSMUSG00000038299
Tmed2	9775.85717394481	-0.213061981973747	0.069125966918297	-3.08222787285672	0.00205457490455578	0.0377216421520644	ENSMUSG00000029390
Mettl7a1	30.5510378567046	0.739924833523019	0.240051705994962	3.08235607181457	0.00205369017196134	0.0377216421520644	ENSMUSG00000054619
ENSMUSG00000116946	38.8710117902003	0.662894136355255	0.215116067544274	3.08156496129153	0.00205915540214257	0.0377651752025997	ENSMUSG00000116946
Ncbp1	4142.60889624734	-0.194551517821832	0.063180255196577	-3.07930883179422	0.00207481479192652	0.038011585464523	ENSMUSG00000028330
Npepl1	1327.1363527935	-0.257899758613503	0.0837664144114946	-3.07879668033294	0.00207838472270857	0.038036220626614	ENSMUSG00000039263
Antxr1	4.85176258174277	2.00783730406911	0.652454512821148	3.07735982296669	0.00208843037705723	0.0380570793550525	ENSMUSG00000033420
Nars2	320.10146590728	-0.273362399748197	0.0888236004660355	-3.07758746902774	0.00208683584756474	0.0380570793550525	ENSMUSG00000018995
Gh	84.2348165302575	0.542135069653295	0.176147915848113	3.07772627932062	0.00208586410956832	0.0380570793550525	ENSMUSG00000020713
Slc25a37	697.743915888394	-0.273320239978428	0.0887950257636306	-3.07810305394806	0.00208322859998535	0.0380570793550525	ENSMUSG00000034248
Gramd1c	74.9828888186858	0.530132806510342	0.17228792631073	3.0770165841698	0.00209083667988841	0.0380603528959879	ENSMUSG00000036292
Letm2	56.0964770968388	0.719314537999121	0.234037715724896	3.07349837085512	0.00211564842889533	0.0384710410586253	ENSMUSG00000037363
Homez	273.39783599108	0.344959008022496	0.112259163171929	3.07288062974582	0.00212003273505084	0.0385097975985377	ENSMUSG00000057156
Sumo3	1760.47936732882	-0.15770841680219	0.0513304319536153	-3.07241553986343	0.00212333912280085	0.0385289125541773	ENSMUSG00000020265
Col18a1	13.6587794102923	1.18491231247711	0.385741395255492	3.07177898729872	0.00212787212741533	0.0385702208631074	ENSMUSG00000001435
Slc25a15	884.827270757105	-0.419353753112948	0.136599619417597	-3.06994818068231	0.00214095913789317	0.0387663289661101	ENSMUSG00000031482
B3gnt7	628.808668734383	0.400222440803887	0.130386592400311	3.06950610055925	0.00214413026632446	0.0387826652299302	ENSMUSG00000079445
Amd-ps3	546.014404023938	-0.418091806274612	0.136323295097111	-3.06691388274309	0.00216281158110322	0.0390792160209275	ENSMUSG00000060096
Orc3	2270.84868160788	-0.206910692345057	0.0674812860011772	-3.06619367540576	0.0021680283171507	0.0390908312500601	ENSMUSG00000040044
Mettl27	70.9252128994898	0.494135876426318	0.161153037300243	3.06625233197247	0.00216760301421427	0.0390908312500601	ENSMUSG00000040557
Dipk1a	656.066248499152	-0.281257828294629	0.0917505036348873	-3.0654635904111	0.00217332837210438	0.0391451020699475	ENSMUSG00000029270
Gen1	1239.27030568774	-0.323985592612758	0.105726036877316	-3.06438794247731	0.00218115868572727	0.0392447846475118	ENSMUSG00000051235
Tuba8	4.45053408929456	1.84934246791475	0.603699571187897	3.06334898379305	0.00218874645974642	0.0393398982507313	ENSMUSG00000030137
Ipo11	1367.37185125828	-0.269050980042841	0.0878579109241244	-3.06234210685021	0.00219612301135457	0.0394310195725669	ENSMUSG00000042590
Castor2	64.368889857011	0.601173338199297	0.196375011070391	3.06135355472396	0.00220338747373387	0.0394785137196363	ENSMUSG00000015944
Eif2s1	11979.6030947479	-0.217031913714309	0.0708907621503578	-3.06149781905277	0.00220232596389594	0.0394785137196363	ENSMUSG00000021116
Dtnb	465.747276890729	-0.247910413171995	0.0810027419908489	-3.06051878095685	0.0022095390264807	0.0395472780938582	ENSMUSG00000071454
Kif13a	60.5025380647032	0.656311418759387	0.214511899838814	3.05955715861239	0.00221664484942992	0.039632960681282	ENSMUSG00000021375
Tada2a	743.777286045126	-0.172123118897753	0.0562775949748078	-3.05846614402769	0.00222473216030201	0.0397359945831162	ENSMUSG00000018651
Apobr	18.738506293866	1.00512132745768	0.328711342120446	3.05776284132411	0.00222995982198827	0.039763547806258	ENSMUSG00000042759
Krt222	211.121284218916	0.452374429740125	0.1479643478143	3.05732047227937	0.00223325372339599	0.039763547806258	ENSMUSG00000035849
Zbtb25	379.531219806389	-0.282095129188206	0.0922632932319763	-3.05750119366472	0.00223190752489403	0.039763547806258	ENSMUSG00000056459
Mef2b	360.914919151045	0.354195712571396	0.115945349068335	3.05485054310065	0.00225172701900521	0.0400507491528159	ENSMUSG00000079033
Ttc27	1141.76909176945	-0.219887162839805	0.0719958543316169	-3.05416422766501	0.00225688496515834	0.0401007637312385	ENSMUSG00000024078
Trmt2a	1801.1432458829	-0.223270847311724	0.0731193621811813	-3.05351196525052	0.0022617970191984	0.0401463099160521	ENSMUSG00000022721
Arhgap18	153.719055223462	0.352915157110359	0.115619072695509	3.0523956721205	0.00227022632432191	0.0402541271386248	ENSMUSG00000039031
Gprasp2	73.8819347088746	0.711703130700665	0.233227275708649	3.05154330057748	0.00227668208293927	0.0403267635685813	ENSMUSG00000072966
Nedd9	3793.33923148176	0.144724267412894	0.047434725927235	3.05101936574697	0.00228065864309331	0.0403553811453354	ENSMUSG00000021365
Nhsl2	3.20286162049294	2.78480103798791	0.912840274351973	3.05069913788022	0.00228309224012217	0.0403566656260685	ENSMUSG00000079481
Gpr132	757.510288001901	0.327829030538167	0.10749039964856	3.04984474529824	0.00228959690912484	0.040429834677346	ENSMUSG00000021298
Mettl2	572.692426407397	-0.247851728076572	0.0813023490240282	-3.04851865969237	0.00229972630273873	0.0405667922525419	ENSMUSG00000020691
Dstyk	66.5829835051886	0.700968809614919	0.230160915826427	3.04555969938678	0.00232247666403183	0.0409004504488956	ENSMUSG00000042046
Oma1	360.88062830842	-0.242553962223335	0.0796450518919324	-3.04543667762874	0.00232342698097921	0.0409004504488956	ENSMUSG00000035069
Hspa1a	84.269165628811	0.796203702904797	0.261502344711909	3.04472873381673	0.00232890262121409	0.0409546630703832	ENSMUSG00000091971
Nup43	670.304578960835	-0.333654819076678	0.109608302561795	-3.04406519650799	0.00233404552284947	0.0410029189332641	ENSMUSG00000040034
Nup107	3699.1842809885	-0.222245011888619	0.0730423222873244	-3.04268819677419	0.00234475148446547	0.0411487034126984	ENSMUSG00000052798
Mgat2	6242.8024956102	-0.29460562576209	0.0969973773789101	-3.03725351883736	0.00238744567773833	0.0417693029371354	ENSMUSG00000043998
ENSMUSG00000056656	5.89795630752015	1.78399758192584	0.587322183704834	3.03751098021254	0.00238540713967619	0.0417693029371354	ENSMUSG00000056656
Shisa8	1864.32268273441	-0.460663681222533	0.15165041953627	-3.03766836010867	0.00238416181565151	0.0417693029371354	ENSMUSG00000096883
Clip2	323.803400220915	0.629057089643387	0.207149521668929	3.0367296268671	0.00239159869588448	0.0417991784343082	ENSMUSG00000063146
Gm12655	42.3704776389352	0.545223854008318	0.179752774144656	3.03318742424274	0.00241985256299331	0.0422497853516289	ENSMUSG00000087128
Icam1	1997.71912339385	0.385703498374136	0.12719402522913	3.03240264375093	0.00242615344767389	0.0423165723276426	ENSMUSG00000037405
Papss2	16.1377125783369	0.975486314138675	0.322422041783473	3.02549512044148	0.00248226409940856	0.0432511113671667	ENSMUSG00000024899
Tdrd7	336.573266461946	0.294771064831864	0.0974543561458393	3.02470896622356	0.00248872481865568	0.0433195247711625	ENSMUSG00000035517
Dctd	298.121897812449	-0.41386723937348	0.136865991086866	-3.02388662140915	0.00249549941709052	0.043393256903691	ENSMUSG00000031562
Serpinf1	92.9576988067447	0.457631288801985	0.151407437389799	3.02251525216566	0.00250683449662452	0.0435460589947183	ENSMUSG00000000753
Dnajc18	511.967558112696	0.258810028723043	0.0857481156989519	3.01825907908792	0.00254231456768015	0.0441175460968089	ENSMUSG00000024350
H1f10	49.8533574467926	0.597504747536502	0.19810258277238	3.01613809963818	0.00256016628600007	0.0443406977700476	ENSMUSG00000044927
Apol9a	2.90524680881813	3.40062244242541	1.12748437601186	3.01611491456237	0.00256036206043626	0.0443406977700476	ENSMUSG00000057346
ENSMUSG00000046733	8.47502769612952	1.30896471422284	0.434073407872098	3.01553767285495	0.00256524069669335	0.0443802218912748	ENSMUSG00000046733
Rad54l	1144.87437894139	-0.198701582193966	0.0659604639297826	-3.01243457604379	0.00259161292701613	0.0447830893230313	ENSMUSG00000028702
Spp1	57.0782783694342	0.624634551666765	0.207369431454162	3.01218239972287	0.00259376694727672	0.0447830893230313	ENSMUSG00000029304
AA467197	20.388230299533	1.02066387203212	0.339296176105591	3.0081797082042	0.002628176744725	0.0453314077674919	ENSMUSG00000033213
Gm5822	73.583520824795	0.531783187130791	0.176847326172753	3.00701853196989	0.00263823678965878	0.0454590538766507	ENSMUSG00000089993
Sgk1	15.1327231074952	1.07680908462739	0.358249485613859	3.00575193508591	0.00264925029262557	0.0456028552385184	ENSMUSG00000019970
Zc3h12d	755.486649936184	0.312798278056827	0.104125098968693	3.00406224008368	0.00266400820866728	0.0458107568518609	ENSMUSG00000039981
Tra2b	12927.1979993384	-0.20670164605264	0.0688177454833146	-3.00360967365251	0.00266797369319778	0.0458328385304821	ENSMUSG00000022858
Gm23639	10.2151747309235	-1.52713654347791	0.508775349511016	-3.00159303108069	0.00268570961173853	0.0460911991902075	ENSMUSG00000092819
Serpinb6b	638.731839494024	0.574535421429104	0.191444510778702	3.00105455670772	0.00269046356430848	0.0461264731240972	ENSMUSG00000042842
Maged1	223.817009717403	0.353062113857458	0.117660304613273	3.0006901224496	0.0026936853554686	0.0461354346503254	ENSMUSG00000025151
Ppan	4053.55325289403	-0.379566193440192	0.1265191960516	-3.00006801565028	0.00269919325466001	0.0461834937956992	ENSMUSG00000004100
Zmynd19	2340.68243846276	-0.28516709924295	0.095142364113315	-2.99726732566068	0.00272411718626431	0.0465633350648159	ENSMUSG00000026974
Cgas	36.4011837739227	0.685630259500555	0.228831969903921	2.9962170923426	0.00273351751543361	0.0465763109881146	ENSMUSG00000032344
Gm14698	919.95492817588	-0.304296220962671	0.101567454637281	-2.99600124911445	0.00273545313202955	0.0465763109881146	ENSMUSG00000071748
Gspt2	13.7146097800707	1.16619190941042	0.389204106971096	2.99635047144308	0.00273232203773231	0.0465763109881146	ENSMUSG00000071723
Arhgef9	12.7657007163536	1.19793804917663	0.399850444801782	2.99596527839424	0.0027357758282377	0.0465763109881146	ENSMUSG00000025656
Fbxo5	2263.26409248527	-0.362760831691308	0.121118053608408	-2.99510123291914	0.00274353770808437	0.0466619801435684	ENSMUSG00000019773
Phldb3	351.95924804493	0.338656094473422	0.113217846617949	2.99119003399004	0.00277892499278076	0.0472168637192857	ENSMUSG00000074277
Mrps2	1386.29361598646	-0.224395083123115	0.0750558045188266	-2.98970991732996	0.00279242499745856	0.0473991265953914	ENSMUSG00000035772
Rrp8	1775.66707896213	-0.254379751987861	0.0851014269950995	-2.98913615164772	0.00279767435035163	0.0474411187207941	ENSMUSG00000030888
Trip13	3432.81405476743	-0.333370414105938	0.11157603757405	-2.98783162903316	0.00280964291582086	0.0475968546681129	ENSMUSG00000021569
Eno2	71.9245587011534	0.786736214968443	0.263532158258424	2.98535184535983	0.002832523122075	0.047936948243196	ENSMUSG00000004267
Gpaa1	303.464110223879	-0.373084135036883	0.125048244662269	-2.98352156837155	0.00284951951458847	0.0481768912590116	ENSMUSG00000022561
Fes	41.61153035366	0.568942006256026	0.190851826212014	2.98106660831214	0.00287246307685821	0.0485168096568552	ENSMUSG00000053158
Snord49a	71.2155821468583	-0.606499450976012	0.203533900557732	-2.97984487750718	0.00288394386158829	0.0485667511587474	ENSMUSG00000065734
Mettl4	687.974430885714	-0.230724197080725	0.077417470882981	-2.98026006855057	0.00288003755979776	0.0485667511587474	ENSMUSG00000055660
ENSMUSG00000117526	57.4838182182644	0.589390778720065	0.197787031764478	2.97992630488485	0.00288317737560483	0.0485667511587474	ENSMUSG00000117526
ENSMUSG00000109704	76.1298247916691	0.453442537719742	0.152212647390051	2.97900697146261	0.00289184198693614	0.0486039872986229	ENSMUSG00000109704
Il27ra	183.739750844812	-0.348778882221534	0.117076916953399	-2.97905762551265	0.0028913639603272	0.0486039872986229	ENSMUSG00000005465
Gls	5202.09294839885	-0.212801816852149	0.0714411190797267	-2.9787021759089	0.00289471989202108	0.048604564945301	ENSMUSG00000026103
Hid1	63.3817576535237	-0.785275752239684	0.263663717951976	-2.97832313956338	0.00289830243173887	0.0486169612028582	ENSMUSG00000034586
Adpgk	1557.83612976072	-0.221676586982602	0.0744790510161417	-2.97636159373941	0.00291690713200255	0.048833196481214	ENSMUSG00000025236
Cd300lf	197.845381231146	-0.35569010418294	0.119493442460401	-2.97664957054703	0.00291416894538733	0.048833196481214	ENSMUSG00000047798
Obscn	3.71495570833765	2.46916610490542	0.83119073389828	2.97063718856086	0.00297182638414604	0.0497039416675228	ENSMUSG00000061462
Zup1	1397.25959029277	0.2760590766942	0.0929500197150106	2.96997329899026	0.00297825634208417	0.0497627914518522	ENSMUSG00000039531
Pde4b	711.730009497422	0.477278578325549	0.160767635799911	2.96874788231359	0.00299015819609448	0.0498155692454609	ENSMUSG00000028525
Trim65	201.940142217781	-0.411125248200813	0.138474543129032	-2.96895905132341	0.00298810412850867	0.0498155692454609	ENSMUSG00000054517
Sat1	1045.9078671899	0.466396308754016	0.157092813364809	2.96892199435583	0.00298846449314797	0.0498155692454609	ENSMUSG00000025283
Myc	3218.7834807574	-0.354472568037418	0.1194287280276	-2.96806785010304	0.00299678171200512	0.0498773026322332	ENSMUSG00000022346
Rragb	158.314808126493	-0.443808324741898	0.149582260189112	-2.96698501667781	0.00300735614270346	0.0500046094817414	ENSMUSG00000041658
Usp5	2750.49856825864	-0.237561889697882	0.080085946154822	-2.96633680569407	0.00301370253518614	0.0500614357958569	ENSMUSG00000038429
ENSMUSG00000093622	3.22737724333389	2.75523085000844	0.929106942696649	2.96546148068987	0.00302229190425007	0.0501553742906276	ENSMUSG00000093622
Ddost	3261.59860164235	-0.222699141324714	0.0751429598137766	-2.96367273629651	0.00303991393403771	0.050224569738772	ENSMUSG00000028757
Trpm2	18.3052917946407	1.19495483449349	0.403062576764614	2.96468812382782	0.00302989925626917	0.050224569738772	ENSMUSG00000009292
Arl1	2230.5028632329	-0.153284289231223	0.0517232468870037	-2.96354731105905	0.00304115308486685	0.050224569738772	ENSMUSG00000060904
Mast4	236.881337140274	0.48236215794941	0.162739068406117	2.96402187055458	0.00303646705288067	0.050224569738772	ENSMUSG00000034751
Ubl4a	574.973055509809	-0.312652031837964	0.10548772413494	-2.96387124096087	0.00303795372904141	0.050224569738772	ENSMUSG00000015290
Hsdl2	1502.02109312653	0.190668260114863	0.0643679900698567	2.96215960616351	0.00305489382936524	0.0503541950099711	ENSMUSG00000028383
Rb1	1097.50948147956	0.247770432572708	0.0836440105308015	2.96220172849636	0.0030544759115305	0.0503541950099711	ENSMUSG00000022105
Seh1l	2480.37110141162	-0.198860995693164	0.0671565373166417	-2.96115618283799	0.00306486475069203	0.0504698778261838	ENSMUSG00000079614
Actg1	57735.1562865713	-0.342163403805415	0.115698400474292	-2.95737367502712	0.00310271854885491	0.0510440501978604	ENSMUSG00000062825
Impdh2	15270.6672218797	-0.184950912369628	0.0625506632696099	-2.95681776502419	0.0031083176586184	0.051086993979581	ENSMUSG00000062867
Sox13	7.71394491662553	1.49372759138453	0.505334671166083	2.95591748719256	0.00311740477434369	0.0511871275771918	ENSMUSG00000070643
Nbn	1793.2485256975	-0.154400020439341	0.0522418615917685	-2.95548465799062	0.00312178222927621	0.0512098115595185	ENSMUSG00000028224
Gm7488	864.202731527078	-0.209074240596252	0.070792814507019	-2.95332573019148	0.00314370053380611	0.0515199168018676	ENSMUSG00000039617
Sgpp1	1414.52392888753	0.364594000185792	0.123489013489671	2.95244078710118	0.00315272529883091	0.0516183271388091	ENSMUSG00000021054
Bop1	2690.39379780296	-0.328781805841386	0.111384123075399	-2.95178340290765	0.00315944466945189	0.0516788399377428	ENSMUSG00000022557
Capsl	5.68066000635345	1.61840641207186	0.548488827045114	2.95066432034858	0.00317091326403534	0.0518168455278739	ENSMUSG00000039676
Tcaim	158.340868669993	0.287481489114489	0.0974598871164461	2.94974165905818	0.00318039741685563	0.0518634849769657	ENSMUSG00000046603
Cul7	317.2567653478	0.399765259985213	0.135509601358552	2.95008808215333	0.00317683346265012	0.0518634849769657	ENSMUSG00000038545
Maged2	48.6039512908463	0.605639071112461	0.205336076004816	2.94950153375998	0.00318286993159989	0.0518634849769657	ENSMUSG00000025268
Itga5	14.4133042902223	1.03080009445041	0.350013012230823	2.94503363712268	0.00322919554236109	0.0525682280053126	ENSMUSG00000000555
Stip1	10439.4468595256	-0.177339802783717	0.0602959231321691	-2.94115743770913	0.00326988293139664	0.0531799323942557	ENSMUSG00000024966
Gss	657.352555526884	0.347903647638647	0.11833594706664	2.93996588748074	0.00328248382969842	0.0533341217690448	ENSMUSG00000027610
Snx5	15031.2316888072	-0.250498137198226	0.0853294759728982	-2.93565774712817	0.00332841330290503	0.0539777690574532	ENSMUSG00000027423
Dynlt3	1618.81472851395	0.254433290042558	0.0866669912410083	2.93575773658758	0.0033273407052169	0.0539777690574532	ENSMUSG00000031176
ENSMUSG00000047501	8.0630807730005	1.42457460962726	0.485345034080326	2.93517911917378	0.00333355195914646	0.0539994780086136	ENSMUSG00000047501
Rsph1	27.1782521755561	0.608290264180066	0.207257820759314	2.93494480426128	0.00333607024963997	0.0539994780086136	ENSMUSG00000024033
Wdr76	1396.0286005016	-0.249077476671593	0.0849551699340544	-2.93186955973294	0.00336928229077068	0.0544139124033868	ENSMUSG00000027242
2510039O18Rik	857.435476755861	-0.164028550929568	0.0559440586528638	-2.93201020589826	0.00336775679388139	0.0544139124033868	ENSMUSG00000044496
Amotl1	37.2762196213166	0.566054180177228	0.193081144722951	2.93169061634398	0.0033712240820913	0.0544139124033868	ENSMUSG00000013076
Eral1	340.414755753222	-0.293542646181346	0.100195104255947	-2.92971047199566	0.00339277960509581	0.0547101714999081	ENSMUSG00000020832
Lss	1584.68292240842	-0.417485882203297	0.14255108521074	-2.92867558030938	0.00340409512405418	0.0547892636115425	ENSMUSG00000033105
Trmt5	676.3481377542	-0.22180956648686	0.0757300317287383	-2.92895118915799	0.00340107826152007	0.0547892636115425	ENSMUSG00000034442
Plaur	84.7207951517867	-0.600539657007805	0.205081669965021	-2.92829513778699	0.00340826351689548	0.0548047491009354	ENSMUSG00000046223
Gpd2	625.540115813669	0.334999971798958	0.114501779571153	2.92571847401536	0.00343661777025375	0.0552087476944994	ENSMUSG00000026827
Rtp4	1114.67394231723	0.394801977033785	0.134988761477292	2.92470256570358	0.00344785597441231	0.055337279033455	ENSMUSG00000033355
Nln	646.237304542993	-0.285372721503817	0.0975987464738556	-2.9239383886991	0.00345633150407175	0.0554212705432444	ENSMUSG00000021710
Slc12a3	5.10455401634456	1.77997417020691	0.608916634642017	2.92318203994108	0.00346473887870995	0.0555040127964284	ENSMUSG00000031766
Abhd13	577.261108707226	-0.194182952215535	0.0664375107352294	-2.92279090632105	0.00346909391513926	0.0555217437186099	ENSMUSG00000040396
Mblac2	95.9611235918615	-0.44552340679344	0.152478469572687	-2.92187748238815	0.0034792837479522	0.0555807449567728	ENSMUSG00000051098
Kif2a	2031.41034665193	-0.166770464648378	0.057074260016371	-2.92199083440666	0.0034780177544098	0.0555807449567728	ENSMUSG00000021693
Mul1	492.329745905805	-0.185574362324561	0.0635547274469484	-2.91991437583408	0.00350127570541036	0.0557756809250505	ENSMUSG00000041241
Arap2	4186.27470299389	0.33892628130955	0.116056368058702	2.92035919250997	0.00349628153395627	0.0557756809250505	ENSMUSG00000037999
Gm18852	511.011576572718	0.321151866278948	0.109979999462204	2.92009336105986	0.00349926537191493	0.0557756809250505	ENSMUSG00000099241
Sort1	8.8851840640705	1.26441709771356	0.433228981840082	2.91858843871228	0.00351620118152284	0.0559612912437336	ENSMUSG00000068747
Jmjd4	356.670829264439	-0.240581528050945	0.0824730456981201	-2.91709280304205	0.00353310634313596	0.0561780341611376	ENSMUSG00000036819
Gm12666	218.074644914	-2.22415417648159	0.762734924523434	-2.91602508941265	0.00354521990701859	0.0562741275904273	ENSMUSG00000066107
Gdpd5	20.6430850608384	0.882268563759212	0.302593377971759	2.91569025625391	0.0035490264753104	0.0562741275904273	ENSMUSG00000035314
Jpt2	987.228058103455	-0.257045143280555	0.0881560666517197	-2.91579641700746	0.00354781917884139	0.0562741275904273	ENSMUSG00000024165
Tsku	10.6801870649766	1.73023537055775	0.59354296160858	2.91509710749258	0.0035557788471509	0.0563289414590828	ENSMUSG00000049580
Gm13217	88.0319323613512	0.919256367936735	0.315725790837058	2.91156565163582	0.00359622324601998	0.056870667321198	ENSMUSG00000082953
Neu3	43.7558037754699	0.57041369089586	0.195915420126303	2.91153034573861	0.00359662969485842	0.056870667321198	ENSMUSG00000035239
Mrpl36	537.257140097947	-0.44320441681566	0.152277449247444	-2.91050591539312	0.0036084413606855	0.05700470256765	ENSMUSG00000021607
Parp2	1773.65183814112	-0.156932770308745	0.0539324281973292	-2.90980353665065	0.00361656015219258	0.0570802056153534	ENSMUSG00000036023
Ttc28	24.4270007770741	0.743571809095534	0.255706983843876	2.90790575180195	0.0036385797906502	0.0573747641712028	ENSMUSG00000033209
Kdm5b	473.346384928646	0.680879574192131	0.234240361016961	2.90675599728447	0.00365197941115895	0.0574997850575073	ENSMUSG00000042207
Bub1	2447.71889308667	-0.19676956449621	0.0677030846594293	-2.9063604041977	0.00365660014962326	0.0574997850575073	ENSMUSG00000027379
Itpripl2	19.138585503474	1.09918685930874	0.378200026159013	2.90636378445567	0.00365656064389641	0.0574997850575073	ENSMUSG00000095115
Stt3b	6863.61381902856	-0.168352632016553	0.0579523162195763	-2.90501990254676	0.00367229748160104	0.0576935485781311	ENSMUSG00000032437
Cyp4f18	87.9836753226026	0.502862418343994	0.173133067687862	2.90448511690785	0.00367857692380982	0.0576989108470606	ENSMUSG00000003484
Abhd5	82.6625347320987	0.45861491930725	0.15791185407325	2.90424630879524	0.00368138415574489	0.0576989108470606	ENSMUSG00000032540
Rsph9	3.80524845035764	2.07423269392709	0.71423576484429	2.90412885495771	0.00368276556099825	0.0576989108470606	ENSMUSG00000023966
Lmntd1	27.2916285390353	-0.780899780744743	0.26915995216736	-2.90124802912429	0.00371679559198463	0.058178742723254	ENSMUSG00000054966
Pwwp3a	1273.70099835404	-0.275385917226283	0.0949431635512164	-2.90053445583502	0.00372526879802275	0.0582580233893896	ENSMUSG00000020156
L3mbtl3	250.067504988818	0.382252265743472	0.131977153194607	2.89635180401128	0.00377528907613604	0.058986303636557	ENSMUSG00000039089
Wdcp	133.065955261273	-0.372135935247224	0.128594860670149	-2.89386320190329	0.00380533909397823	0.0594015170167761	ENSMUSG00000051721
Ddx39	6031.82457103461	-0.251625370041126	0.0870397789733185	-2.89092381677876	0.00384111221814187	0.0599052291466232	ENSMUSG00000005481
Fignl1	2835.13423977588	-0.248177720262381	0.0858886761035875	-2.88952783441512	0.00385820848680246	0.0601170078987369	ENSMUSG00000035455
ENSMUSG00000086754	4.96725291647053	1.70063153281293	0.588731812629049	2.88863536220094	0.003869174579509	0.0601781629550021	ENSMUSG00000086754
Adk	1092.63793685162	-0.225468948776258	0.0780515481920457	-2.88871846874186	0.00386815222848686	0.0601781629550021	ENSMUSG00000039197
Ppp1r8	2990.30671903997	-0.176659100056935	0.0611683483460354	-2.88808027082171	0.0038760094399452	0.060229663051803	ENSMUSG00000028882
Pa2g4	36265.3034287429	-0.202597142398082	0.0701622782556741	-2.88755079559718	0.00388253910618264	0.0602763314641052	ENSMUSG00000025364
ENSMUSG00000090799	7.38568690001204	1.65724672460645	0.574077246018847	2.88680092461293	0.00389180386443072	0.0603653388881255	ENSMUSG00000090799
Ulk1	292.416516745889	0.4272568553897	0.148046908476102	2.88595594320477	0.00390226778557239	0.0604727681403344	ENSMUSG00000029512
ENSMUSG00000057614	4.52852619659832	2.13267217794033	0.739310638130428	2.88467670820136	0.00391815796896378	0.0606542312635433	ENSMUSG00000057614
Fam43a	1832.63307162732	0.380714722661838	0.131989017613648	2.88444242971979	0.00392107444838328	0.0606542312635433	ENSMUSG00000046546
G3bp1	14629.3234029249	-0.405140554852053	0.140504906645953	-2.88346196957331	0.00393330137713731	0.0607883548276745	ENSMUSG00000018583
Ap5b1	147.303500944141	-0.481237351469525	0.166964282023592	-2.88227724898387	0.00394812174911295	0.0609622809914974	ENSMUSG00000049562
Pola2	1993.90060188761	-0.335680364364562	0.116512833102199	-2.88105915397422	0.00396341247872524	0.0611431493671937	ENSMUSG00000024833
Snrpa	3141.69514262623	-0.200090346563907	0.0694698640667527	-2.88024669764205	0.00397364110591425	0.0611904931742273	ENSMUSG00000061479
Deaf1	454.308334468793	-0.187543907156372	0.0651096632222063	-2.8804312274865	0.00397131581862425	0.0611904931742273	ENSMUSG00000058886
Insr	233.901573847914	0.293712582881862	0.101992090074422	2.87975844663587	0.00397979959175713	0.0612301659963138	ENSMUSG00000005534
Glmn	763.522617024174	-0.328966117832662	0.11434440749581	-2.87697601515593	0.00401506111925049	0.0616616708996844	ENSMUSG00000029276
Mmgt2	260.000087419404	-0.298564555475412	0.103773755500954	-2.87707189581924	0.00401384132822001	0.0616616708996844	ENSMUSG00000048497
Mcm6	11164.1701917522	-0.160890617411523	0.0559584965971175	-2.87517762619467	0.00403800261264657	0.0619583291364163	ENSMUSG00000026355
Gusb	1135.4155523427	-0.191291908980111	0.0665731828492268	-2.87340789178346	0.0040606946690923	0.0622040829208774	ENSMUSG00000025534
Mbtd1	917.079071991596	0.224392530309009	0.0780940959832294	2.87336100743386	0.00406129740476799	0.0622040829208774	ENSMUSG00000059474
Aebp2	9067.28600811707	0.199098471858303	0.0693080164353196	2.87266152024575	0.00407029951853114	0.0622861501076569	ENSMUSG00000030232
Lzts2	12.579168084501	1.0623528606598	0.36993134418064	2.8717568202089	0.0040819694966766	0.0624088592188669	ENSMUSG00000035342
Trim30c	167.993377720765	0.713508751694691	0.248641598295382	2.86962743397046	0.00410955698745479	0.0627349378075001	ENSMUSG00000078616
Dusp4	872.158078030767	0.461782172572886	0.160925264550538	2.86954428108376	0.00411063770809104	0.0627349378075001	ENSMUSG00000031530
Atp13a3	3392.27032348279	-0.195108375521905	0.0680161427706781	-2.86855983850376	0.00412345191731454	0.0628743654082582	ENSMUSG00000022533
Rnft1	875.643977222177	-0.183823493654357	0.0641324399392355	-2.86631061953243	0.00415286548590328	0.0632664258026246	ENSMUSG00000020521
Cyc1	2271.54076270468	-0.256452199122237	0.0895120747244857	-2.86500117343483	0.00417007696937253	0.0634720620102268	ENSMUSG00000022551
Timm10b	91.1769049340456	-0.58224068806193	0.203268535075889	-2.86439161793808	0.00417811107783978	0.0635377692646934	ENSMUSG00000089847
Dnajc12	56.4555549946174	0.506593607094465	0.176923470841317	2.86334879530388	0.00419188833334312	0.0636906198060747	ENSMUSG00000036764
Cables1	2.87903022089251	2.61192197820871	0.912538462469352	2.86225960398511	0.0042063221791329	0.0638531660816329	ENSMUSG00000040957
Abcb4	53.7436321532242	0.835621239589446	0.292133513423131	2.860408687103	0.00423095376343933	0.0639957850626656	ENSMUSG00000042476
Gm43302	173.160252236291	0.449656679274735	0.157204681319824	2.86032626700176	0.00423205362789681	0.0639957850626656	ENSMUSG00000079362
Csnk2a2	2821.6910790924	-0.186931083212561	0.0653385255134826	-2.86096268233032	0.00422356763639042	0.0639957850626656	ENSMUSG00000046707
Smim24	17.6138663045819	0.871057706664144	0.304549900920412	2.8601477263057	0.00423443707399958	0.0639957850626656	ENSMUSG00000078439
Colq	22.4865348322209	0.753097933406828	0.263252560063714	2.86074305687495	0.00422649438673732	0.0639957850626656	ENSMUSG00000057606
Pgam1-ps2	7552.40122915388	-0.361300637422205	0.126366922420137	-2.85913932619943	0.00424792167952806	0.0641428668446759	ENSMUSG00000082016
Amd2	2227.12197853117	-0.48232036165902	0.168741091887117	-2.85834562444148	0.00425856265688433	0.0641901335927017	ENSMUSG00000063953
Paip2	2445.50984489301	0.330719696995144	0.115694871792754	2.85855104785948	0.00425580627607733	0.0641901335927017	ENSMUSG00000037058
Ube2cbp	97.118936828567	-0.518971006783349	0.181615723508475	-2.85752244771435	0.00426962433027003	0.0643001662355115	ENSMUSG00000032415
Gm13363	18.2220648686456	0.925296349876571	0.324010276225492	2.85576235623039	0.00429336353124895	0.0645439426909747	ENSMUSG00000060795
Bcas3	144.472655689877	0.444324341932371	0.155578774485243	2.85594447830361	0.00429090162368737	0.0645439426909747	ENSMUSG00000059439
Gm21960	15.5919224853183	0.980541756315846	0.343531422019067	2.85430005369763	0.00431317726346364	0.0647706720750705	ENSMUSG00000095836
Gpr18	874.330217786733	0.267401773669107	0.093690713902946	2.85409046990621	0.00431602383978853	0.0647706720750705	ENSMUSG00000050350
Snrnp40	3226.71202473397	-0.143504230775437	0.0503031656177856	-2.85278727517496	0.00433376214553191	0.0649727853174714	ENSMUSG00000074088
Rtl8a	214.984963111965	0.371296076052115	0.130163181492722	2.85254302940401	0.0043370940178573	0.0649727853174714	ENSMUSG00000067925
ENSMUSG00000022938	6.95963119365209	1.42714797118167	0.500418806262904	2.85190714921272	0.00434577925717538	0.065045888654027	ENSMUSG00000022938
ENSMUSG00000110720	3.6916545755275	2.03003785294562	0.712284277222025	2.85003883682924	0.00437138910643637	0.0653719632513709	ENSMUSG00000110720
Gm13183	8.15104082958975	1.53229589698793	0.537743533172548	2.84949200215906	0.0043789106680023	0.0654272028393036	ENSMUSG00000080703
Gm28229	66.3981065324542	-0.596927332677002	0.209557642625714	-2.84851139379898	0.00439242805455493	0.0655146358957307	ENSMUSG00000101335
Tmem71	151.129879088165	0.4256979639121	0.149434835829209	2.84871972154227	0.00438955316030484	0.0655146358957307	ENSMUSG00000036944
Lgr5	3.11056270109927	2.37668563665345	0.834451397686746	2.84820139704009	0.00439670912653307	0.0655213156929641	ENSMUSG00000020140
Ttll9	23.8998742108952	0.740966525664799	0.260315215427292	2.846420346381	0.00442137889915503	0.0657773947401843	ENSMUSG00000074673
Foxj1	28.8174077153894	0.672887025044359	0.236398888972517	2.84640519238052	0.00442158933811922	0.0657773947401843	ENSMUSG00000034227
Ier5	5092.534802369	0.370200204685691	0.130145868404905	2.84450216686048	0.0044480883295859	0.0660005497700119	ENSMUSG00000056708
Por	1676.03179216213	-0.212185723399907	0.0745951899963153	-2.84449605142622	0.00444817371643677	0.0660005497700119	ENSMUSG00000005514
Rsf1	2632.11496157074	0.229627790641052	0.0807203626372566	2.8447319008335	0.00444488174099172	0.0660005497700119	ENSMUSG00000035623
Eprs	16181.6501836915	-0.147299706089322	0.0517896974940439	-2.84418935071521	0.00445245793583185	0.066006820032241	ENSMUSG00000026615
Egf	66.9129187051241	0.486207345866149	0.170970397688787	2.8438101123867	0.00445776058371214	0.0660281643478264	ENSMUSG00000028017
Oxld1	105.704338429918	0.549414933113072	0.19322100122649	2.84345350466877	0.00446275202199846	0.0660448660710127	ENSMUSG00000039670
A930012O16Rik	12.3012962619314	0.984777557734459	0.346662000163549	2.84074273289215	0.00450086057014245	0.0665512194856789	ENSMUSG00000054181
Gbp5	1471.39320555828	0.266386384579053	0.0938163320758165	2.83944574132121	0.00451919799764972	0.0666909302349713	ENSMUSG00000105504
Toe1	931.061004960758	-0.237941584080573	0.0838044685391242	-2.83924697845306	0.00452201416616929	0.0666909302349713	ENSMUSG00000028688
Rpl7l1	4884.21957287021	-0.154302909463197	0.0543370962307702	-2.83973418100722	0.00451511407033923	0.0666909302349713	ENSMUSG00000063888
Vdr	50.2620802409093	0.637215959686299	0.224688604811849	2.83599588959971	0.0045683033953378	0.0673155258073354	ENSMUSG00000022479
Entpd5	532.379041421481	-0.262948720158261	0.0927416158439256	-2.83528292844041	0.00457851178921875	0.0673498296154183	ENSMUSG00000021236
Rpgrip1	263.641067754726	0.295141867345507	0.104087084665226	2.83552823383197	0.00457499710321576	0.0673498296154183	ENSMUSG00000057132
Lrig2	201.55471692209	0.397970232808693	0.140388529758766	2.83477741018114	0.00458576246626988	0.0673984848116519	ENSMUSG00000032913
Sytl2	7.01262578396112	1.33095811199701	0.469595906425413	2.8342625942554	0.00459315718688025	0.0674491716454846	ENSMUSG00000030616
Nek6	471.505245127488	-0.285729678424613	0.10087367475605	-2.83254951418805	0.0046178413732568	0.0677534442859042	ENSMUSG00000026749
Tmbim1	136.367342038535	0.438198726005158	0.154772380574196	2.83124627520407	0.00463670044904158	0.067855411622832	ENSMUSG00000006301
Snai1	35.6551703646453	0.750860492623949	0.265180088174134	2.83151158819619	0.00463285547992085	0.067855411622832	ENSMUSG00000042821
Mki67	23599.3703796257	-0.179694761710307	0.0634599240989537	-2.83162585303611	0.00463120042059835	0.067855411622832	ENSMUSG00000031004
Eif1b	1246.8180194199	-0.379422246153951	0.13406761458039	-2.83008127907311	0.00465361803007869	0.0680447330950685	ENSMUSG00000006941
Irgm2	447.478836404416	0.435921661246292	0.154087762823826	2.82904789619599	0.00466867113275085	0.0680900986963398	ENSMUSG00000069874
Arf1	10846.3764426594	-0.170510715266663	0.0602700118287864	-2.82911368511169	0.00466771148505142	0.0680900986963398	ENSMUSG00000048076
Rpp40	365.801839472573	-0.354568467561481	0.125312853459152	-2.82946607450016	0.00466257430216303	0.0680900986963398	ENSMUSG00000021418
Pcmtd2	520.46731973563	0.330307145801046	0.116801905068727	2.82792601376398	0.00468506329130444	0.0682127656203295	ENSMUSG00000027589
Mtch1	1573.75870654975	-0.183887966344871	0.0650210065349358	-2.82813164767094	0.00468205481853898	0.0682127656203295	ENSMUSG00000024012
Atp2b4	12.0527403431431	1.01464058738636	0.358955194156686	2.82664968749125	0.00470377542095032	0.0683870424716004	ENSMUSG00000026463
Cyp4v3	285.417997639157	0.281862740122575	0.0997192158803347	2.82656394391244	0.00470503492345417	0.0683870424716004	ENSMUSG00000079057
Trim32	296.626147500833	0.316115580096885	0.111867905774034	2.82579331319045	0.00471636856350665	0.0684353886723422	ENSMUSG00000051675
Gm7324	4249.86412771433	-0.236269776460295	0.0836041642980743	-2.82605272648766	0.00471255062453082	0.0684353886723422	ENSMUSG00000049235
Mpeg1	1561.73657814476	0.488369123520077	0.172851827097712	2.82536280767229	0.00472271074729522	0.0684692916060366	ENSMUSG00000046805
Mcub	13.1479596741051	1.2745506306348	0.451249601739444	2.82449142497137	0.00473557154212638	0.0685394787210552	ENSMUSG00000027994
ENSMUSG00000028434	32.8703983170235	0.770565529454045	0.272797483069185	2.82467976164801	0.00473278918636478	0.0685394787210552	ENSMUSG00000028434
Twsg1	1472.66196707528	0.281918527365873	0.0998430796194475	2.82361610279258	0.0047485223874544	0.0686687759464959	ENSMUSG00000024098
Gsn	179.69590507375	0.549654304299244	0.194723014749642	2.82274956047667	0.00476137489790964	0.0687506626769296	ENSMUSG00000026879
Plxna1	408.983132874901	0.601664377438969	0.21315268203317	2.82269203324094	0.00476222925229537	0.0687506626769296	ENSMUSG00000030084
Gbp6	546.702601727627	0.498803468743638	0.176795523963059	2.82135801609922	0.00478208009817979	0.0689208221907143	ENSMUSG00000104713
Kars	7765.57930036456	-0.175361152213621	0.0621505197081099	-2.82155568508848	0.00477913396613391	0.0689208221907143	ENSMUSG00000031948
Sp140	10009.0592948899	0.25113037804752	0.089020674524504	2.82103432027347	0.00478690813067344	0.0689322836374061	ENSMUSG00000070031
Nif3l1	513.36264200456	-0.248347324961595	0.0881126878867996	-2.81851945409556	0.00482456873251131	0.0694161223441211	ENSMUSG00000026036
Gm14150	4387.55824360897	-0.386733801657445	0.137288738424795	-2.81693754414746	0.00484839528590204	0.0696899729156801	ENSMUSG00000082809
Irf3	1486.67928497744	-0.14572445579148	0.051735605888997	-2.81671497390295	0.00485175614401564	0.0696899729156801	ENSMUSG00000003184
Timm9	1072.00035473968	-0.527105493331375	0.187263385232401	-2.81478139828144	0.00488104236185385	0.0700517691781426	ENSMUSG00000021079
Ppp1ca	12044.2592159904	-0.198506859906788	0.0705872758477041	-2.81221873946627	0.00492010317797033	0.0705531238431601	ENSMUSG00000040385
Scamp1	26.2575991912153	0.747610997140725	0.265998037385593	2.81058839564663	0.00494510029766455	0.0708521369555575	ENSMUSG00000021687
Nsun2	13201.5019726682	-0.32245603911438	0.11474618019713	-2.81016795993044	0.00495156519763793	0.0708853466693677	ENSMUSG00000021595
Slc2a4rg-ps	105.252300310674	-0.41411637385023	0.147441732212618	-2.80867816482958	0.00497453485698758	0.0710254603676091	ENSMUSG00000085028
ENSMUSG00000005131	6.85196611177605	1.6383731165738	0.583401345896977	2.80831219896281	0.00498019204053162	0.0710254603676091	ENSMUSG00000005131
2410018L13Rik	17.2653044648359	-0.853855627252754	0.30401080174468	-2.80863581936097	0.0049751891454277	0.0710254603676091	ENSMUSG00000073164
Phf11a	189.643936546255	0.642402052943664	0.228741901197036	2.80841441634389	0.00497861135576608	0.0710254603676091	ENSMUSG00000044703
Gm10548	38.1019379991442	0.54900150552477	0.195500337395914	2.80818699771841	0.00498212876503618	0.0710254603676091	ENSMUSG00000073607
Otud6b	2586.6310949261	-0.189335596673056	0.0674464573490569	-2.80719854110624	0.00499744302369538	0.0711844113366876	ENSMUSG00000040550
ENSMUSG00000087006	3.76722655602447	2.25340342101324	0.803104255824009	2.80586661653434	0.00501814598647466	0.0714197912962626	ENSMUSG00000087006
Wdr3	4154.05355141236	-0.19912593202011	0.0710298666453778	-2.80341131730208	0.00505651362756101	0.0719059795639769	ENSMUSG00000033285
Fut1	29.3709430323149	-0.838775309790242	0.299244619265403	-2.80297541138517	0.00506335294964262	0.0719433848447558	ENSMUSG00000008461
Gm11759	46.2399138487884	0.652630518188673	0.232891975742607	2.80228855505938	0.00507414663099556	0.0720368674116339	ENSMUSG00000084178
Exoc3l2	3.00991255405892	3.0987680639658	1.10632157621303	2.80096504541923	0.00509500374498968	0.0722729452390942	ENSMUSG00000011263
Ccdc77	761.96559153945	0.281287918564444	0.100436871377547	2.80064397373618	0.00510007516133278	0.0722848961299015	ENSMUSG00000030177
Csnk2a1	4343.16054153054	-0.10721397636053	0.0383052618832433	-2.79893599702634	0.0051271299017339	0.0725819539338073	ENSMUSG00000074698
Ahdc1	112.531181572947	0.325518691314845	0.116307141241894	2.79878507750297	0.00512952672743458	0.0725819539338073	ENSMUSG00000037692
Fbxo38	2011.64544269436	0.162945209471922	0.0582275442765206	2.79842146009286	0.00513530567047338	0.0726036226843684	ENSMUSG00000042211
Bcat1	1918.39394914347	-0.235178071650562	0.0840741553042023	-2.79726951522291	0.00515365230810971	0.0728027924814209	ENSMUSG00000030268
Mov10	894.417365407594	0.254369851568895	0.0910027881648352	2.79518745192894	0.00518696297464617	0.0731670997807325	ENSMUSG00000002227
Acadsb	436.173212238364	0.238491661137623	0.0853242195767164	2.79512267818859	0.00518800239479599	0.0731670997807325	ENSMUSG00000030861
Nicn1	138.748537323936	0.395146793704174	0.141431941601493	2.79390065094039	0.00520764749172211	0.0733836097081666	ENSMUSG00000032606
Gm4070	26079.0316671046	0.183417917001303	0.0656581673347471	2.7935278191086	0.00521365443815357	0.0734077391362101	ENSMUSG00000078606
Klf4	20.9546990639009	0.988645867385293	0.354258154967495	2.79074977815544	0.00525861081258471	0.0739797815798441	ENSMUSG00000003032
Bcl2l14	22.6170410594117	0.674688982194915	0.242303633000456	2.78447736767382	0.00536140625702643	0.0753639121310467	ENSMUSG00000030200
Aimp2	898.239407263603	-0.268946074991565	0.096630262697172	-2.78324892724767	0.00538174978361447	0.0755693777299119	ENSMUSG00000029610
1810034E14Rik	30.9310769979604	0.618557432036205	0.222257936271819	2.78306116943205	0.00538486527087303	0.0755693777299119	ENSMUSG00000097101
Dst	97.7954136055351	0.506652345037636	0.18226440870011	2.77976566380143	0.00543981376563533	0.0762778808006601	ENSMUSG00000026131
Inf2	1876.64633208276	0.28557835680716	0.102772296543341	2.77874842163059	0.00545687697374454	0.0764544246821438	ENSMUSG00000037679
Fam229b	29.9964811167518	0.879998521884986	0.316731182609571	2.77837664935487	0.00546312512305153	0.0764792774187713	ENSMUSG00000051736
Zbtb46	125.583031545412	0.597693512151486	0.215163538768128	2.77785685982602	0.00547187173438633	0.076539037279759	ENSMUSG00000027583
Chp1	1451.66018418936	0.199083961306391	0.0716826576016478	2.77729604296666	0.00548132289605637	0.0766085464123397	ENSMUSG00000014077
Gm33370	10.2826098727993	1.05257402487099	0.379158798362614	2.77607701421278	0.00550191741029201	0.0768335574298377	ENSMUSG00000105283
Dbn1	18.0954369618265	0.797499651482389	0.287602353047382	2.77292464067915	0.00555549843296315	0.0775184773180728	ENSMUSG00000034675
Gm10241	2221.51862983069	-0.200455831385938	0.0723137825207051	-2.77202802008792	0.00557082410245974	0.0776689203779317	ENSMUSG00000084838
Gm14418	9.45745378427707	-1.23704223798823	0.446364479222875	-2.7713724894551	0.00558205302309752	0.0777620475336642	ENSMUSG00000078867
Cd55b	29.0984057211641	0.996876567024373	0.360172444326094	2.76777577721026	0.00564402716578927	0.0781788584151682	ENSMUSG00000026401
Fcrl5	1260.63761582244	-0.357155608297999	0.1289818645593	-2.76903741094388	0.00562221791281026	0.0781788584151682	ENSMUSG00000048031
Rita1	76.8703977306649	-0.405199908492183	0.146392894629291	-2.76789327459004	0.00564199282729169	0.0781788584151682	ENSMUSG00000029600
Cpsf4	1227.34406335617	-0.307111587747246	0.110958640976472	-2.76780235450403	0.00564356695114269	0.0781788584151682	ENSMUSG00000029625
Repin1	308.626785294501	0.449787416456604	0.162539489080587	2.76725009412082	0.00565313689821259	0.0781788584151682	ENSMUSG00000052751
Il15	27.2658186750248	0.762428456367297	0.275474183172381	2.76769477120184	0.00564543008147701	0.0781788584151682	ENSMUSG00000031712
Tspyl1	1624.86675716394	0.222853068779181	0.0805267120907524	2.76744279001519	0.00564979606994086	0.0781788584151682	ENSMUSG00000047514
Zfand3	895.962361002084	0.169430920927097	0.0612217608207499	2.76749506475599	0.00564889007376786	0.0781788584151682	ENSMUSG00000044477
Vars2	449.888923675278	-0.272114900387737	0.0982813042087625	-2.76873513816757	0.00562743621926118	0.0781788584151682	ENSMUSG00000038838
Galnt12	471.567171797782	-0.18807249292796	0.0680126288579744	-2.76525839518272	0.005687772141822	0.0785942515926948	ENSMUSG00000039774
Nagpa	282.055837464296	-0.265089732928546	0.0958997162055788	-2.7642389718889	0.00570557365816803	0.0787765513239629	ENSMUSG00000023143
Gvin1	26415.9832455757	0.184543883972241	0.0668167960883454	2.76193853605667	0.00574592942300732	0.0791813280249587	ENSMUSG00000045868
ENSMUSG00000113899	4.54638690464998	1.76394742443082	0.638700359658917	2.76177615646375	0.00574878769548784	0.0791813280249587	ENSMUSG00000113899
Cplane1	299.935404724802	0.453319670292013	0.164128756261666	2.76197590609471	0.00574527180163562	0.0791813280249587	ENSMUSG00000039801
Arl8a	620.511482066406	0.219681462490786	0.0795756172063705	2.76066300461191	0.0057684163993969	0.0793877145852586	ENSMUSG00000026426
Atg4a	663.653516585317	0.237713646572765	0.0861848149178635	2.75818480087603	0.00581233287196821	0.0799277600808952	ENSMUSG00000079418
Usp39	2315.83287914706	-0.162599594351291	0.0589670703542899	-2.75746435043066	0.00582515647205584	0.0800397102707801	ENSMUSG00000056305
Gm18853	541.909239409649	0.310189520770243	0.11255554131822	2.75587960519215	0.00585345381982585	0.0803533140332784	ENSMUSG00000098934
Hmga1	7583.87523377907	-0.261065249347481	0.0947378246165582	-2.75566016429147	0.00585738192742438	0.0803533140332784	ENSMUSG00000046711
Alg6	282.892603155583	-0.279545221334678	0.101462661171707	-2.75515365067745	0.00586645786153241	0.0804132832615665	ENSMUSG00000073792
Trpv2	1149.59911225134	0.268543959271164	0.0975064179421427	2.75411572836683	0.00588509542382442	0.0806041154482619	ENSMUSG00000018507
Tubb4b-ps1	349.321131403544	-0.30124091113876	0.109408632425988	-2.75335596889526	0.00589877193901313	0.0807267484015624	ENSMUSG00000095159
Cbx7	715.179632654652	-0.190889313383287	0.0693695966987251	-2.75177199331757	0.00592737741747145	0.0810533297574716	ENSMUSG00000053411
Ttc7	1077.11407511806	-0.278674927289844	0.10129170123748	-2.75121183557265	0.00593752335403796	0.081127167618362	ENSMUSG00000036918
Samd1	2537.02502014384	-0.318340126885709	0.115753457803607	-2.75015652168095	0.00595668040331042	0.081323912247432	ENSMUSG00000079003
Spg21	1061.60178405441	-0.19964588029359	0.0726112382283814	-2.74951763893147	0.00596830505189497	0.0814175883894978	ENSMUSG00000032388
Cd44	7117.4528952045	0.273027726619286	0.0993243637249139	2.74884949049819	0.00598048406200788	0.0814537163919528	ENSMUSG00000005087
Ptges3-ps	1282.31827485565	-0.273893568403794	0.0996323055988421	-2.74904376404371	0.00597694053673205	0.0814537163919528	ENSMUSG00000040078
Gm12669	500.521024413123	0.355799254024062	0.129643146499695	2.74445093034594	0.00606122153055657	0.0824876270874232	ENSMUSG00000100863
Mex3d	302.530704584626	-0.328155976991786	0.119614591279492	-2.74344436980114	0.00607983487872664	0.0826093939444153	ENSMUSG00000048696
Rars	8870.07865502593	-0.218747644431735	0.0797329104717973	-2.74350507384413	0.00607871088049782	0.0826093939444153	ENSMUSG00000018848
Phgdh	8973.19437949848	-0.294818148957294	0.107523077715516	-2.74190578637754	0.00610838592024575	0.082931406302431	ENSMUSG00000053398
Accs	38.9728603139043	0.629020986808939	0.229524215575998	2.74054301952581	0.00613377517135054	0.0832100150824562	ENSMUSG00000040272
Ctu2	846.469440582171	-0.447339582749858	0.163251180938749	-2.740192016851	0.0061403299572688	0.0832328786356825	ENSMUSG00000049482
Gpr68	2.99775135462983	2.41831590916189	0.882838823022579	2.73924961850034	0.00615795995506599	0.0834057127669912	ENSMUSG00000047415
Plekha2	4427.98421902346	0.177558314069869	0.064854456056302	2.73779667376634	0.00618523036789053	0.0837087432132644	ENSMUSG00000031557
B3galt6	124.934840920174	-0.53608095243201	0.195867274795818	-2.73696028594285	0.00620097785454186	0.0837891813973787	ENSMUSG00000050796
Gm7030	21.6286302254635	0.954199054109718	0.348609330397809	2.73715867851515	0.00619723926239395	0.0837891813973787	ENSMUSG00000092243
Mcrip2	81.9727313744971	-0.557291015864228	0.203684978446358	-2.73604376775872	0.0062182754778476	0.0839565424509077	ENSMUSG00000025732
Pnrc1	1280.02386229368	0.41467977861719	0.151603359777805	2.73529412029495	0.00623245600308643	0.0840815867882844	ENSMUSG00000040128
Tmpo	13421.1892036544	-0.21328372306526	0.0779889791056177	-2.73479311450426	0.00624194938181691	0.0841432498291769	ENSMUSG00000019961
Mindy3	1066.95748090941	-0.256630414248883	0.0938990809490799	-2.73304500592556	0.00627517570497789	0.0841927616367246	ENSMUSG00000026767
Fscn1	29.8396828132765	0.598715797448318	0.218968867776898	2.73425077969685	0.00625224056084986	0.0841927616367246	ENSMUSG00000029581
Bcam	4.58279720511366	1.68743069573166	0.617195581339049	2.73402912585774	0.00625645099136058	0.0841927616367246	ENSMUSG00000002980
Uqcrc1	5920.98355763829	-0.128091371201117	0.0468644161625629	-2.73323305163548	0.00627159389141944	0.0841927616367246	ENSMUSG00000025651
ENSMUSG00000117613	12.5709243047199	0.961413547381224	0.351703293583487	2.73359267576209	0.0062647490510771	0.0841927616367246	ENSMUSG00000117613
Plgrkt	571.098953544593	0.241713912775188	0.088425310782145	2.73353761086238	0.00626579668261288	0.0841927616367246	ENSMUSG00000016495
Tsen2	336.178670187564	-0.302893354149622	0.110842603689319	-2.73264380362808	0.0062828237893146	0.084229260416278	ENSMUSG00000042389
Fam234a	45.1923546688643	0.751527148751876	0.275154933091323	2.73128720720572	0.00630874665937256	0.0845105067779429	ENSMUSG00000024187
Ppp1r15b	5896.02910240577	-0.151330391415444	0.0554256249903771	-2.7303326113457	0.00632704546112913	0.0846213618419433	ENSMUSG00000046062
ENSMUSG00000033542	4.92248630174645	1.91166128621743	0.700221418648081	2.73008113620443	0.00633187397155827	0.0846213618419433	ENSMUSG00000033542
Tubb2a	383.589781838694	0.252437746520924	0.0924494487725399	2.73054896348831	0.00632289399073553	0.0846213618419433	ENSMUSG00000058672
Pinlyp	7.39569705110735	1.46834958209296	0.537918705674359	2.72968678464559	0.00633945249408444	0.0846564542823323	ENSMUSG00000011632
9330151L19Rik	134.613514736605	-0.387238647311899	0.1419176553373	-2.72861502955032	0.00636009040001755	0.0848657495765027	ENSMUSG00000097061
Bora	1585.66918996875	-0.298319146691816	0.109381350239859	-2.72733099415614	0.00638489561127947	0.0851302813444618	ENSMUSG00000022070
Cdca7	4616.32683777933	-0.217615051159102	0.0798072015868015	-2.72675957598156	0.00639596232720029	0.0851450031610861	ENSMUSG00000055612
Vsir	213.494029106094	0.343771542642979	0.126070666077343	2.72681626376176	0.00639486367831468	0.0851450031610861	ENSMUSG00000020101
Mtmr4	1906.07566849977	-0.184239342777406	0.0675789650578054	-2.72628239600609	0.00640521714344989	0.0852018495198358	ENSMUSG00000018401
Retreg1	689.323695372197	0.195458999334825	0.071719002100719	2.72534465915088	0.00642343948795075	0.0853778002858027	ENSMUSG00000022270
Dkkl1	44.2354585312146	0.696811718992704	0.255871331040364	2.72328953837654	0.00646353834559951	0.0858440255954409	ENSMUSG00000030792
1600012H06Rik	362.256434065728	-0.283265874324664	0.104035069704042	-2.72279218085301	0.0064732764071913	0.0859066099597212	ENSMUSG00000050088
Ppp1r13l	35.0972327957457	0.594926881644168	0.218658040176567	2.72080953969843	0.00651222703485136	0.0862226930338608	ENSMUSG00000040734
Sar1a	2914.08856338965	-0.137390390303014	0.0504901722487207	-2.72113134465481	0.00650589061296514	0.0862226930338608	ENSMUSG00000020088
Pfkl	4724.3984065347	-0.434034185955608	0.159522706545167	-2.72083012729424	0.00651182149368333	0.0862226930338608	ENSMUSG00000020277
Faap24	593.679027545404	-0.190581576948307	0.0700665023333734	-2.72000985637228	0.0065279970468577	0.0863645925092405	ENSMUSG00000030493
Akt1s1	601.642105157892	-0.239088791961415	0.0879098200303352	-2.71970516921674	0.00653401460623357	0.0863773485416476	ENSMUSG00000011096
Hnrnpab	55919.972393175	-0.254970025068403	0.0937780668669657	-2.71886629343838	0.00655060815559055	0.0865297876379515	ENSMUSG00000020358
Bcl3	1787.49158987092	-0.229482149215534	0.0844214962813691	-2.71829047486544	0.00656202017522432	0.0865467676351152	ENSMUSG00000053175
9930111J21Rik2	1767.79462800866	0.571172874324589	0.210116293356161	2.71836545943828	0.00656053306085499	0.0865467676351152	ENSMUSG00000069892
Polr3h	974.73165469329	-0.250193379329607	0.0920606593570249	-2.71770136209126	0.00657371417026661	0.0866341529008228	ENSMUSG00000022476
Immt	6690.58186783659	-0.128904793513311	0.0474787456684388	-2.71499997943289	0.00662757745759238	0.0872767191699743	ENSMUSG00000052337
Plpp5	276.40345119602	-0.373024043647451	0.137433924915434	-2.71420643685306	0.00664347525743459	0.0872942847066624	ENSMUSG00000031570
Pin1	1729.41241569096	-0.247761196376443	0.0912777753415332	-2.71436497492842	0.00664029637406023	0.0872942847066624	ENSMUSG00000032171
Dusp7	734.655863013507	-0.330330722041132	0.121717454185298	-2.71391415678355	0.00664933941894778	0.0872942847066624	ENSMUSG00000053716
Slc35b2	588.712376552683	-0.204832656999259	0.0754685920515	-2.71414440671533	0.00664471941033574	0.0872942847066624	ENSMUSG00000037089
Cers6	129.655936674255	0.55495140074512	0.204556172541253	2.71295358067575	0.00666864473360306	0.0874134543186174	ENSMUSG00000027035
Kcnk10	28.3765752386658	0.827876255822671	0.305129843461887	2.71319332920668	0.0066638216404132	0.0874134543186174	ENSMUSG00000033854
Tagln2	4192.54443762024	-0.194847367043413	0.071849409496045	-2.71188543385507	0.00669017112395158	0.087628425303988	ENSMUSG00000026547
Tkt	11843.9826434029	-0.203855673387401	0.0751822106745181	-2.71148815070019	0.00669819350544701	0.0876663258718268	ENSMUSG00000021957
Aar2	427.46021890999	-0.222026786595207	0.0819414776480309	-2.70957752981822	0.00673689580471955	0.0881054016756475	ENSMUSG00000027628
Il5ra	856.982691194683	0.319283028458656	0.11786836692197	2.70881014810382	0.00675249668785535	0.0881745041142181	ENSMUSG00000005364
Ttll12	897.006989778894	-0.300583311109554	0.110964479684703	-2.70882458930676	0.00675220279842948	0.0881745041142181	ENSMUSG00000016757
Calhm2	99.8847325386089	0.443861633768599	0.163898622527295	2.70814743238419	0.00676599583088427	0.0882833333872556	ENSMUSG00000033033
Cd86	2044.3818472234	0.25373750617253	0.0937128996328996	2.70760489928806	0.00677706497192754	0.088360313932233	ENSMUSG00000022901
Ptov1	173.741621503382	0.328299719315768	0.121265220068005	2.70728671528125	0.00678356435413631	0.0883776413911981	ENSMUSG00000038502
Aacs	1602.9837597599	-0.386657944874532	0.142882730677224	-2.70612090797734	0.00680742559292554	0.0885535202890992	ENSMUSG00000029482
Cdca7l	1024.12115858594	-0.362637297992148	0.134006149713739	-2.70612429927138	0.00680735607214401	0.0885535202890992	ENSMUSG00000021175
Plau	9.63949596394347	1.1461408480267	0.423798321498923	2.70444876698177	0.00684178192958902	0.0889327593326731	ENSMUSG00000021822
Selenop	76.5849903284736	0.517437037134397	0.191347787968379	2.70417046691914	0.00684751506921924	0.0889396467159304	ENSMUSG00000064373
Endog	170.84039961176	-0.591668928749294	0.218830298077282	-2.70377975055512	0.00685557133283831	0.0889671314506389	ENSMUSG00000015337
Mfng	423.619400016154	-0.350762039799485	0.129740649255375	-2.70356316091084	0.00686004090867268	0.0889671314506389	ENSMUSG00000018169
Adarb1	46.4031403380677	-0.457667802192474	0.169304289970884	-2.70322625771137	0.00686699849656567	0.0889898448080341	ENSMUSG00000020262
ENSMUSG00000115388	25.4237575398841	2.05740316330212	0.761346792170503	2.70232065657849	0.00688573203920152	0.0891650134439936	ENSMUSG00000115388
Plscr1	1313.02963731633	0.232341788633936	0.0860214431883952	2.70097524549879	0.00691364840703642	0.0894587374878679	ENSMUSG00000032369
ENSMUSG00000046449	3.68963906945058	2.25584683292491	0.835651961853262	2.69950521975922	0.00694426664203354	0.0897869513708618	ENSMUSG00000046449
Mad2l1	3218.76514466759	-0.197699986723786	0.0732528894160794	-2.69886946849076	0.00695754598932877	0.0898906527555531	ENSMUSG00000029910
Gm15459	27573.5573599752	-0.216114120586582	0.0800938517212848	-2.69826105177996	0.0069702757363464	0.0899871020856262	ENSMUSG00000100801
Tpgs2	205.80780084947	-0.332860674255128	0.123405113740375	-2.69730049400882	0.00699041582857705	0.0901790020814094	ENSMUSG00000024269
Dmpk	5.52938859973345	1.37642631444591	0.510355821897267	2.69699346101117	0.00699686442816369	0.0901941204152353	ENSMUSG00000030409
Skp2	403.895790190596	-0.331190521186835	0.122812838694459	-2.69670927492191	0.00700283793572123	0.0902030963340489	ENSMUSG00000054115
Mkrn1	1591.99325484539	0.19414997130262	0.0720155317129205	2.69594581453027	0.0070189083334847	0.0902839743911539	ENSMUSG00000029922
Pradc1	196.967938428344	-0.378833736250294	0.140521699183034	-2.6959091617363	0.00701968068600267	0.0902839743911539	ENSMUSG00000030008
Srgap3	4.74319120584204	1.73844200883734	0.645344374380433	2.69382066049051	0.0070638161363088	0.0907833152014483	ENSMUSG00000030257
Tmem141	7.28145329075317	1.4274949166575	0.530095658589426	2.69290059921645	0.00708333835811981	0.0909658170964252	ENSMUSG00000026939
C1qbp	10676.8822115353	-0.348765401198292	0.129621503950897	-2.69064461194966	0.0071314119528458	0.0914619290301307	ENSMUSG00000018446
Klhl14	195.701494492404	0.301666204473607	0.112119158680582	2.69058569493041	0.00713267135067947	0.0914619290301307	ENSMUSG00000042514
Wdr82	2762.45623150793	-0.148997915581776	0.0554068202908036	-2.68916199846442	0.00716316475571023	0.09178408933235	ENSMUSG00000020257
Rnu2-10	19.1251227425407	2.74554539009263	1.02150936767204	2.68773393272894	0.00719386925252084	0.0921084697628005	ENSMUSG00000065944
H2-T10	1430.21108393448	0.224770868261308	0.0836557835156407	2.68685390077404	0.00721284938493783	0.0922823611801963	ENSMUSG00000079491
Spcs3	5849.6762453625	-0.215064951066294	0.0800654194489483	-2.68611533601501	0.00722881309099731	0.0924174286944031	ENSMUSG00000054408
Lysmd2	200.729666712589	-0.600784669938449	0.223758052648895	-2.68497451969319	0.00725353358364154	0.0926241166779788	ENSMUSG00000032184
Cfl2	413.467627363733	-0.341628510404239	0.127242138806532	-2.68486928629577	0.00725581771671524	0.0926241166779788	ENSMUSG00000062929
Tprn	283.35368822598	-0.277604571972763	0.10340751878317	-2.68456854239835	0.0072623490422202	0.0926383075960222	ENSMUSG00000048707
Slx1b	118.536165230704	-0.329263530282217	0.122667352894763	-2.68419854600346	0.00727039157807759	0.0926717399284715	ENSMUSG00000059772
Fndc9	223.750412301045	0.592352611962466	0.220787284631753	2.6829108974751	0.00729844327401082	0.0929599783030306	ENSMUSG00000048721
Entpd6	457.83453390275	-0.219291571809288	0.0818136205816661	-2.68037974912003	0.00735386811320204	0.0933227127419399	ENSMUSG00000033068
Vav3	214.253221220021	0.491385205692392	0.183340390836441	2.68017976535656	0.00735826323414782	0.0933227127419399	ENSMUSG00000033721
Gcsh	1889.25620696219	-0.411075372373759	0.153391418257612	-2.67991115176587	0.00736417036781708	0.0933227127419399	ENSMUSG00000034424
Wdr41	274.629886141046	-0.272169873628372	0.101560960324879	-2.67986707449142	0.00736514008593441	0.0933227127419399	ENSMUSG00000042015
Zdhhc23	103.40473312154	-0.375198574017586	0.139928632141272	-2.68135669073636	0.00733243132375083	0.0933227127419399	ENSMUSG00000036304
Gm9816	84.0021053545607	-0.438632679248724	0.163641988778413	-2.68044089737064	0.00735252470455384	0.0933227127419399	ENSMUSG00000085783
Utp14a	5162.95876649361	-0.1222900602356	0.045618916338041	-2.68068753166817	0.00734710845792501	0.0933227127419399	ENSMUSG00000063785
Cryzl2	135.943019062489	0.45570205936258	0.170113271701074	2.67881544341435	0.00738831039750965	0.0935469552775055	ENSMUSG00000033488
Gm29106	5.57385060805643	-1.34309004892287	0.50155004546623	-2.67787843120293	0.00740901040432526	0.0937317367821743	ENSMUSG00000102030
A430005L14Rik	346.359082824496	-0.602437719906385	0.22498674500131	-2.67765872119656	0.00741387165093896	0.0937317367821743	ENSMUSG00000047613
Map1lc3a	44.8396556201695	0.624140923689765	0.233130055305098	2.67722204617912	0.00742354190365865	0.0937846280556078	ENSMUSG00000027602
ENSMUSG00000044576	17.2330838919625	0.812134787600528	0.303424344258219	2.67656436594088	0.00743812771154285	0.0938218048271216	ENSMUSG00000044576
Rac1	5229.04990380656	-0.1946991629717	0.0727380419064466	-2.67671713272287	0.0074347374120597	0.0938218048271216	ENSMUSG00000001847
Yae1d1	548.043326644414	-0.23043721852049	0.0861013942221848	-2.67634712076608	0.00744295134532129	0.0938218048271216	ENSMUSG00000075054
Uba52	3532.30502578764	-0.28453271844328	0.106334920099769	-2.67581635624794	0.00745474805248156	0.0939012589985758	ENSMUSG00000090137
Ythdf1	2681.992689413	-0.158531110587915	0.0592610849719115	-2.67513007335347	0.00747002614944918	0.0939552295603641	ENSMUSG00000038848
Rnaseh1	1035.27343495847	-0.198083448740283	0.0740440016955725	-2.67521263308663	0.00746818671191999	0.0939552295603641	ENSMUSG00000020630
Arhgef33	8.96316884819749	1.38331709873671	0.517232106047196	2.6744610061203	0.00748494801651696	0.0940736885634739	ENSMUSG00000054901
Ruvbl1	7192.70101099957	-0.263202786437592	0.0984264803680676	-2.67410543842816	0.00749288893501405	0.0941042987260803	ENSMUSG00000030079
ENSMUSG00000020303	26.7661573508086	0.817959211421821	0.306149941476983	2.67176014300599	0.0075454561090036	0.0946254448064553	ENSMUSG00000020303
Dnaaf2	611.045496111711	-0.876639187509832	0.328093323930576	-2.67192022381817	0.0075418575897771	0.0946254448064553	ENSMUSG00000020973
Coq3	211.831077745087	-0.243599789412263	0.0911886659711822	-2.67138231289891	0.00755395560539167	0.0946625829640468	ENSMUSG00000028247
ENSMUSG00000110498	4.33754772766738	1.50852080558175	0.564941308261358	2.67022570932956	0.00758002742410263	0.0949197133774258	ENSMUSG00000110498
C430002N11Rik	29.9361571700335	0.947176744541742	0.354807349856132	2.66955220889817	0.00759524641231249	0.0950342361920378	ENSMUSG00000101581
Epas1	10.9203331986506	0.981208792290059	0.367586285601395	2.669329163586	0.007600292568567	0.0950342361920378	ENSMUSG00000024140
Pusl1	455.653990366025	-0.506259488183688	0.189738253285519	-2.6681993715936	0.00762589907386044	0.0952151153173824	ENSMUSG00000051557
Arap3	5.37200751104365	1.4856418828869	0.556752090943229	2.66840826833714	0.00762115865214862	0.0952151153173824	ENSMUSG00000024451
Mfsd5	461.582501155264	-0.330021942313733	0.123719307107153	-2.66750558203418	0.00764166197322032	0.095342283290697	ENSMUSG00000045665
ENSMUSG00000020411	7.09054571877075	1.21162097535103	0.454690061802742	2.66471840300892	0.00770528142742976	0.0960659193574448	ENSMUSG00000020411
Zfp706	4586.83510618782	-0.264778136090333	0.0994197188687846	-2.66323561465498	0.00773932026217649	0.0964199717502789	ENSMUSG00000062397
Mir5120	3.78043893888716	1.68731543900195	0.633866713163623	2.66194044262172	0.00776916236901568	0.0966848514630081	ENSMUSG00000092761
Tomm40	2126.89421837567	-0.451893117334469	0.169799575021777	-2.66133244018139	0.0077832069041771	0.0966848514630081	ENSMUSG00000002984
Epop	1200.58249506868	-0.488500230747388	0.183548921669999	-2.66141705602421	0.00778125096125401	0.0966848514630081	ENSMUSG00000043439
Rtl6	312.21933654988	0.379027216819972	0.142405774586045	2.66160005043163	0.00777702244840803	0.0966848514630081	ENSMUSG00000055745
Plek	3401.24790094895	0.348826086866854	0.131111011528748	2.66053997143	0.00780154665967902	0.0967018397780229	ENSMUSG00000020120
Pqlc3	372.487357431341	0.257816999056893	0.0968979631351488	2.66070607384493	0.00779769942057353	0.0967018397780229	ENSMUSG00000045679
Mcm4	8057.20140017704	-0.154488117256993	0.0580641821530481	-2.66064398960768	0.00779913720734119	0.0967018397780229	ENSMUSG00000022673
Gm16185	39.9847093108444	0.800609197312903	0.301106604799549	2.65888952467808	0.00783986656012894	0.0970360891472005	ENSMUSG00000084911
Dynlt1b	1719.47917119789	0.206491207296139	0.0776551205302393	2.65908037855315	0.00783542672939207	0.0970360891472005	ENSMUSG00000096255
Ankrd27	1034.8011451556	-0.191918728727074	0.0722160176610764	-2.65756455344555	0.0078707515290346	0.0972774807561739	ENSMUSG00000034867
Zfp712	84.8259906127015	0.353360055974377	0.132957364890222	2.65769448925326	0.00786771792350182	0.0972774807561739	ENSMUSG00000090641
Abi1	1857.65971193823	0.224176733682425	0.0843714297086289	2.65702186695904	0.00788343293596508	0.0973638144324068	ENSMUSG00000058835
Ppp1ccb	3054.16583258359	-0.188626522565755	0.0710210476243171	-2.65592424887254	0.00790913784875426	0.0976107532481996	ENSMUSG00000100153
ENSMUSG00000026830	9.49428644458559	1.18353726059687	0.445859231534216	2.65450881553865	0.00794239642753213	0.0979504921614767	ENSMUSG00000026830
Srsf10	10746.0223169219	-0.269891738306451	0.101706483700297	-2.65363355891598	0.0079630250393072	0.0980779091887647	ENSMUSG00000028676
Klc3	23.4401368655925	0.671431395100773	0.253028167269499	2.65358360038088	0.00796420394044378	0.0980779091887647	ENSMUSG00000040714
Inppl1	271.052383109269	0.529312398886208	0.199593160923676	2.65195659228332	0.0080026829468895	0.098362167099751	ENSMUSG00000032737
Rrp7a	3129.2340540944	-0.204992365660245	0.0773035677529732	-2.65178402005075	0.00800677405752743	0.098362167099751	ENSMUSG00000018040
Tbc1d22a	534.614738727944	0.301360857531468	0.113633630963163	2.65203932125659	0.00800072238335343	0.098362167099751	ENSMUSG00000051864
Gpam	310.434339694344	-0.235291000294478	0.0887343040626214	-2.65163515711386	0.00801030460439088	0.098362167099751	ENSMUSG00000024978
Tiparp	1999.46955457168	-0.316131138447193	0.119234747373435	-2.65133398955501	0.00801745158684068	0.098379253391147	ENSMUSG00000034640
Exosc1	1746.47930315686	-0.277213642854277	0.10457064663298	-2.65096995935424	0.00802609797878931	0.0984147006825292	ENSMUSG00000034321
Zc2hc1c	9.59581300415769	0.995589521763753	0.375608246556547	2.65060613256229	0.00803474788048632	0.0984501401585324	ENSMUSG00000045064
Ap4s1	588.631457216646	-0.488157024935601	0.184224151401706	-2.64979928647445	0.00805396025425685	0.098614858614622	ENSMUSG00000020955
Ino80e	1176.5118410201	-0.190679606821408	0.0719682866319254	-2.64949487816237	0.00806121941173483	0.0986330876197447	ENSMUSG00000030689
Gde1	560.657486703825	-0.235876652081201	0.0890544636929264	-2.64867859846464	0.00808071397469094	0.0988008898207384	ENSMUSG00000033917
Kbtbd8	574.751604224149	-0.207583135792247	0.0784092588440236	-2.64743142394935	0.00811058076735047	0.0990951801689218	ENSMUSG00000030031
Fbxl5	972.411165470312	-0.133375861784814	0.0503951730264164	-2.64659993755553	0.00813054770420694	0.0991265705477955	ENSMUSG00000039753
Gcc1	583.383930320618	0.268985592628937	0.101632781782811	2.64664203724894	0.00812953568476639	0.0991265705477955	ENSMUSG00000029708
Ddx60	511.597142287084	0.570258006596273	0.215460117525543	2.64669867047978	0.00812817447668939	0.0991265705477955	ENSMUSG00000037921
Ptpa	3282.94487615969	-0.136312676808738	0.0515207232627321	-2.64578344744125	0.00815019733172391	0.0992245890250404	ENSMUSG00000039515
Tpbg	8.25899521696582	1.39422622748537	0.526946661605011	2.6458583554524	0.00814839282843046	0.0992245890250404	ENSMUSG00000035274
Zkscan14	226.080844089405	0.339566432240465	0.128393954768817	2.64472289876793	0.00817578392266889	0.0993945053984206	ENSMUSG00000029627
Aars2	413.568670032622	-0.219193286925159	0.0828794582893285	-2.64472393340175	0.00817575892630126	0.0993945053984206	ENSMUSG00000023938
Gm8000	10.5339141310206	1.00330918707339	0.379581348567333	2.64319938495455	0.00821266573844294	0.0997719228622638	ENSMUSG00000101132
Thap7	307.39503589151	-0.386758692349778	0.146352406561944	-2.64265345159242	0.00822591809800043	0.0998619446371601	ENSMUSG00000022760
Ppm1g	13381.320167566	-0.244913794403195	0.0927069195165877	-2.64180705906611	0.00824650184319101	0.0999698269543716	ENSMUSG00000029147
Gm23823	18.3878481214145	-0.824462353130656	0.312076569908042	-2.64185918658872	0.00824523280333214	0.0999698269543716	ENSMUSG00000089365
Polr1b	1040.96712880787	-0.348630080259467	0.131984690767686	-2.64144332370418	0.00825536181364624	0.100006307215206	ENSMUSG00000027395
Synj2	107.075756486116	0.437381031585753	0.165605873659366	2.64109612733544	0.00826382686701267	0.100037955125954	ENSMUSG00000023805
C1ra	36.4130937349023	0.619183766357156	0.23457017218141	2.63965260629257	0.00829910493064872	0.100393914069058	ENSMUSG00000055172
Samd8	289.078936492027	0.247446896086523	0.0938146363294421	2.63761504353736	0.00834913004130649	0.100927637762413	ENSMUSG00000021770
Cd38	561.918765880739	0.296981650169147	0.112618898685288	2.63704985252126	0.00836305400359412	0.10095316531316	ENSMUSG00000029084
Mettl25	218.872921692536	-0.343798958737442	0.130362243464954	-2.6372586847193	0.00835790682669618	0.10095316531316	ENSMUSG00000036009
1110065P20Rik	88.0533541362131	-0.453799726295847	0.172127207785829	-2.63642065733437	0.00837857919357493	0.101011703828623	ENSMUSG00000078570
Ip6k1	837.647314049324	0.166809869458702	0.0632724516203981	2.63637436493649	0.00837972246118216	0.101011703828623	ENSMUSG00000032594
Agfg1	3197.4739877824	-0.18713693506749	0.0710046829352954	-2.63555764678258	0.00839991563220655	0.101087641042636	ENSMUSG00000026159
Depdc5	748.685473379078	0.562299584098773	0.213402514941406	2.63492482388581	0.00841559195013576	0.101087641042636	ENSMUSG00000037426
Nup54	2290.48480994803	-0.147307723685189	0.055904236292237	-2.63500109213806	0.00841370124373863	0.101087641042636	ENSMUSG00000034826
N4bp2l1	870.010591384044	0.3500773651306	0.132858287945291	2.63496820969691	0.00841451635994124	0.101087641042636	ENSMUSG00000041132
Tfeb	828.774388892712	-0.166898119090496	0.0633323161386858	-2.63527578440398	0.00840689471125976	0.101087641042636	ENSMUSG00000023990
Dbf4	4704.53421612002	-0.355333464209034	0.134881458863552	-2.6344129667851	0.00842829083398979	0.101098087877465	ENSMUSG00000002297
Pdp2	658.315165008661	-0.241148145479582	0.0915334256995589	-2.63453643995697	0.00842522596731132	0.101098087877465	ENSMUSG00000048371
Txn2	1602.53814507891	-0.314898713382236	0.119564185314938	-2.63372106415293	0.00844548378518492	0.101233277938405	ENSMUSG00000005354
Socs5	70.7049574601583	0.487135160411924	0.184996855813575	2.63320778220587	0.00845825848422138	0.101315355480586	ENSMUSG00000037104
Birc2	4145.66002552126	0.224755342176237	0.0853918581693231	2.6320465088202	0.00848722436363217	0.101591124683169	ENSMUSG00000057367
Vdac2	8003.50502329688	-0.27281829579627	0.103698588407456	-2.63087762317749	0.00851646966179068	0.10181471324992	ENSMUSG00000021771
Cpped1	359.820309606173	0.265763657072616	0.101021064088223	2.63077467527486	0.00851904971132173	0.10181471324992	ENSMUSG00000065979
Mex3c	1829.66603847894	0.212349210878601	0.0807231501691319	2.63058627461497	0.00852377316215032	0.10181471324992	ENSMUSG00000037253
Wdr46	2623.70913023936	-0.195727102088998	0.0744133215238704	-2.63026966248526	0.00853171631660103	0.101838426675741	ENSMUSG00000024312
Abtb1	149.802409676143	0.461826112180136	0.175614747602253	2.62976839067137	0.00854430574147559	0.101917528289632	ENSMUSG00000030083
Slc25a13	579.526835882614	-0.260147225851481	0.0989762401467732	-2.62838056351409	0.0085792476674534	0.102191693644447	ENSMUSG00000015112
Ftl1	3315.0417640345	-0.527510173951318	0.200695726978486	-2.62840759936989	0.00857856575575123	0.102191693644447	ENSMUSG00000050708
Sh3bp4	14.2945111628604	0.843263407232571	0.321014792580025	2.62686775414673	0.00861748179697643	0.102558390363917	ENSMUSG00000036206
Qtrt2	696.010816227498	-0.2127984593175	0.0810139813072687	-2.62668808375681	0.00862203281770019	0.102558390363917	ENSMUSG00000022704
Gtf3c1	2261.54435453942	0.410651990239671	0.156420260192096	2.62531202630247	0.00865695941852795	0.102902230417871	ENSMUSG00000032777
Dpp3	2121.63565932861	-0.123273613172307	0.0469682523014456	-2.62461571661489	0.00867468104304335	0.103041225204128	ENSMUSG00000063904
Rflna	3.61412868892102	2.44284422231233	0.930881871134309	2.62422579927961	0.00868461889884335	0.10308763252634	ENSMUSG00000037962
Slc5a6	102.553452740556	-0.478607980155321	0.182471495290654	-2.6229191545395	0.00871799568584873	0.103290838874109	ENSMUSG00000006641
ENSMUSG00000112099	811.748545228376	0.37601664414529	0.143336526540317	2.6233134932255	0.0087079106854561	0.103290838874109	ENSMUSG00000112099
Slc38a9	234.357286372496	0.252945348199832	0.0964437846068659	2.62272316698182	0.00872301184440069	0.103290838874109	ENSMUSG00000047789
Hells	11678.6888054291	-0.185334986525847	0.0706761648597099	-2.62231244286856	0.00873353239560638	0.103290838874109	ENSMUSG00000025001
Ikbkg	789.747263939022	0.247334155208938	0.0943224346228655	2.62221979529968	0.00873590709667176	0.103290838874109	ENSMUSG00000004221
Arxes2	27.0306629398286	-0.783054021052722	0.298631848483842	-2.62213834535164	0.00873799526191784	0.103290838874109	ENSMUSG00000048040
Dok2	63.4809641781304	0.428298676864582	0.163393483708748	2.62127146776571	0.00876024740443386	0.103410848676787	ENSMUSG00000022102
Rcbtb2	425.126056821518	-0.246428940617571	0.0940065823880883	-2.62140090999411	0.00875692150011501	0.103410848676787	ENSMUSG00000022106
ENSMUSG00000096385	4.79138482740494	-3.63332407167299	1.38652456406161	-2.62045416709368	0.00878127330217292	0.103516072106236	ENSMUSG00000096385
Cenpm	654.581255319335	-0.240431592195354	0.0917509176101745	-2.6204816088803	0.00878056660315243	0.103516072106236	ENSMUSG00000068101
Vps13c	187.661338394011	0.534011235028341	0.203846478002157	2.61967359093979	0.00880139650939129	0.103557018439782	ENSMUSG00000035284
Sash1	20.6487665834592	0.67258026772831	0.256747805232407	2.61961447779269	0.00880292211975681	0.103557018439782	ENSMUSG00000015305
Eif2ak2	3995.2582231891	0.318238369098152	0.121471518233665	2.61985997808954	0.00879658771881055	0.103557018439782	ENSMUSG00000024079
Glrp1	11.8009980747374	1.31851294463746	0.503688019439278	2.61771750319826	0.00885200544249771	0.1039912914286	ENSMUSG00000062310
ENSMUSG00000086866	5.59809445042538	1.29750511721692	0.49562963916428	2.61789250417862	0.00884746715965476	0.1039912914286	ENSMUSG00000086866
Ciapin1	602.886740660482	-0.243037897896519	0.0928680390738233	-2.61702411637358	0.0088700074237001	0.10413120665749	ENSMUSG00000031781
Nat10	4353.37849427276	-0.325907933823849	0.124549799284013	-2.61668774817272	0.00887875212180338	0.10416232671104	ENSMUSG00000027185
Gm7666	234.670485626045	-0.442456304034424	0.169107586179865	-2.61641901483841	0.00888574402246946	0.104172854990446	ENSMUSG00000067547
Gm8116	1201.39168718637	-0.275418459588364	0.105283549538975	-2.61596859902986	0.00889747396606586	0.104238877657275	ENSMUSG00000059422
ENSMUSG00000112135	94.4968850188402	0.417590041290062	0.15964920378398	2.6156725582866	0.00890519113138392	0.104257830142976	ENSMUSG00000112135
Dtnbp1	1564.39129416658	-0.288067523070015	0.11016921638765	-2.61477327801259	0.00892867017203895	0.104461163073691	ENSMUSG00000057531
Mtfmt	626.139194451965	-0.219419655408269	0.0839364416085511	-2.61411671978618	0.00894584695781491	0.104523666746388	ENSMUSG00000059183
Larp4	5164.24694783397	-0.213956591496954	0.0818470829922734	-2.6141016108925	0.00894624258175659	0.104523666746388	ENSMUSG00000023025
Taf8	704.618731683398	0.166726359772378	0.063809578048464	2.61287356650043	0.00897845102348041	0.104828321956524	ENSMUSG00000023980
Stxbp5	612.279427675062	-0.212160165205252	0.0812128875428486	-2.61239529370649	0.00899102287914953	0.10483189227374	ENSMUSG00000019790
Ppp3cb	4369.13860210927	-0.191597501396335	0.0733393506461546	-2.61247883582647	0.00898882576252421	0.10483189227374	ENSMUSG00000021816
Ttc41	52.9572612050231	0.443135693701111	0.169688244676088	2.61146960737909	0.00901540009038397	0.105044467447126	ENSMUSG00000044937
Akr1e1	278.260253394374	0.274194663391826	0.105007992694709	2.61117898128951	0.00902306566064945	0.105062167123625	ENSMUSG00000045410
Gm12981	4.22285867533842	1.67873006509668	0.643145928989791	2.61018532408891	0.00904931840457292	0.105296119461787	ENSMUSG00000086997
Rmi1	749.286974094499	-0.213599263165987	0.0818829840517306	-2.60859158517041	0.00909156793604563	0.105715762401924	ENSMUSG00000035367
ENSMUSG00000038354	2.96002255228725	2.06640848651456	0.792301703952357	2.60810809342753	0.0091044199239325	0.105793235730645	ENSMUSG00000038354
Emc6	1808.37134002928	-0.294559606346012	0.113042978729885	-2.60573110913734	0.00916784015841003	0.106457806948168	ENSMUSG00000047260
Lamtor1	1467.51426320146	-0.185718818725582	0.0713069640630711	-2.60449762748717	0.00920090579712295	0.106769234752357	ENSMUSG00000030842
Gtdc1	253.792787685478	-0.2604652942678	0.100142789582524	-2.60093907263449	0.00929689637987376	0.107674714697858	ENSMUSG00000036890
Slc25a10	206.247466008211	-0.311059222630208	0.11959832060722	-2.60086614135475	0.00929887298163365	0.107674714697858	ENSMUSG00000025792
Hmgcs1	14359.8294129922	-0.540184878727653	0.207701457959836	-2.60077557487396	0.00930132805895628	0.107674714697858	ENSMUSG00000093930
Mrps18b	478.403496596192	-0.268639991441523	0.103296371104842	-2.60067211043516	0.00930413348205325	0.107674714697858	ENSMUSG00000024436
Xbp1	3808.05988852054	-0.300093941335821	0.115430040131576	-2.59979066968834	0.00932806424954858	0.107878621256789	ENSMUSG00000020484
Car2	1131.3862097464	0.587645853159786	0.226079576148175	2.59928766309539	0.00934174527742482	0.107963794473984	ENSMUSG00000027562
Trp53inp2	118.462785279738	0.430445838738666	0.165616909949786	2.59904522351717	0.00934834566307239	0.107967075958714	ENSMUSG00000038375
Klhdc2	10146.1855070103	-0.244288379880964	0.0940364704534114	-2.59780464646419	0.0093821853695364	0.108284736341314	ENSMUSG00000020978
Eif3s6-ps2	46.929267682541	0.458423074562438	0.176504951347001	2.59722501303206	0.00939803368116165	0.108394459994667	ENSMUSG00000091697
Fastkd2	848.958392611311	-0.289076198028349	0.11138298718857	-2.59533529603535	0.00944986821174552	0.108918811425062	ENSMUSG00000025962
Zdhhc2	117.611348492615	-0.557707204573839	0.214916383908924	-2.59499622332274	0.00945919583826892	0.108952853412083	ENSMUSG00000039470
H3c15	33.3023768847433	1.95972361517071	0.755833638725985	2.59279756121198	0.00951987883749483	0.109577972369898	ENSMUSG00000081058
Gm13414	541.488167071105	0.262990796605096	0.101440430008172	2.59256389768764	0.0095263483071048	0.109578648461199	ENSMUSG00000087635
Ndufaf4	2152.22386308331	-0.479418628737521	0.18513422068856	-2.58957326719201	0.00960949713334855	0.110460749495848	ENSMUSG00000028261
Armc1	2280.3925301547	-0.138801973353837	0.0536241985956386	-2.58842047040169	0.00964172085344299	0.110756676443482	ENSMUSG00000027599
St6galnac3	31.8460853987186	-0.642194529171872	0.248147883906002	-2.58795085842898	0.00965487534083203	0.110833300336361	ENSMUSG00000052544
Nefh	986.886579406356	-0.307511081987649	0.118877263429266	-2.58679475887013	0.009687327504182	0.111131200690593	ENSMUSG00000020396
Nfx1	3908.85111481498	-0.109860435261385	0.0424768017659887	-2.58636316045222	0.00969946754201473	0.111195840842158	ENSMUSG00000028423
Gm12066	33.3831805293294	0.6550493870626	0.253376631062902	2.58527940921268	0.00973001118990392	0.111471234094523	ENSMUSG00000085579
Txndc11	1163.94531446143	-0.195376109750145	0.075590364874365	-2.58466948896027	0.0097472384065973	0.111593801797701	ENSMUSG00000022498
AC133103.7	142.303613686204	-0.516508721296228	0.199968517196076	-2.58295019905445	0.00979594621385617	0.112076377934032	ENSMUSG00000096100
Ttbk2	79.7185384253528	0.401473833531588	0.155466119921065	2.58238794237245	0.0098119220514878	0.112109079963958	ENSMUSG00000090100
Tpm4	10501.6930092399	-0.171528766680833	0.0664217919159245	-2.5824170311146	0.00981109496120646	0.112109079963958	ENSMUSG00000031799
Fcor	4.40254318478959	1.7455965423625	0.676039551259568	2.58209233337041	0.00982033072929787	0.112130202508944	ENSMUSG00000089665
Cd200r1	3.51325408897019	1.93701150874282	0.750440129035525	2.58116728276817	0.00984668554605785	0.112356072122007	ENSMUSG00000022667
AC125149.3	90.8290730067339	-0.350041284570241	0.135714591768801	-2.57924575396107	0.00990163166672731	0.112907665163022	ENSMUSG00000079800
Selenok-ps4	8.60163919842844	1.07916828757276	0.418609280397244	2.57798462219631	0.00993784204246734	0.11324502268793	ENSMUSG00000095905
Sco1	1748.75805680694	0.261792662791548	0.101562822991286	2.57764263616432	0.00994768166171084	0.113281627344186	ENSMUSG00000069844
Psmd5	1600.22314481383	-0.130600276504506	0.0506983837242893	-2.57602445897966	0.00999435762357131	0.113737386724171	ENSMUSG00000026869
Sft2d2	1603.64878854547	0.299163072588947	0.116177304390653	2.57505606760331	0.0100223838677569	0.113904659209819	ENSMUSG00000040848
Cul9	149.714296977958	0.421864251304353	0.163822628769751	2.57512807890096	0.0100202973801651	0.113904659209819	ENSMUSG00000040327
ENSMUSG00000117628	89.3082922660286	0.644564377835828	0.250343773444833	2.57471703396636	0.0100322123805112	0.113940602139587	ENSMUSG00000117628
Scyl1	1979.34905434617	-0.295101837939021	0.114667641862505	-2.57354065319377	0.010066382008615	0.11425276737932	ENSMUSG00000024941
Cnot7	2608.31828563444	-0.215845765482075	0.0838842654495802	-2.57313769543363	0.0100781102904437	0.11430997955843	ENSMUSG00000031601
Rab5if	1163.28501882676	-0.246931975818106	0.0960250306798803	-2.57153758837428	0.0101248023721028	0.114763426356998	ENSMUSG00000027637
2810004N23Rik	3318.1118302674	-0.182127513572747	0.0708836708078827	-2.56938603061868	0.0101878897154224	0.115401987346398	ENSMUSG00000031984
Foxk2	2504.89968521048	-0.220646840394675	0.0859170558170223	-2.56813781962672	0.0102246495830149	0.115741679021506	ENSMUSG00000039275
Gmeb1	710.242706957693	-0.1744909359653	0.0679786929533562	-2.56684746917725	0.0102627745329781	0.11601958008743	ENSMUSG00000028901
Igkv9-124	107.613731028182	-0.382256249759756	0.14891968709158	-2.56686175767132	0.0102623516704109	0.11601958008743	ENSMUSG00000096632
ENSMUSG00000113258	36.5657003009246	-0.490698487047676	0.191201096309783	-2.56639996589062	0.0102760260749697	0.116092606542932	ENSMUSG00000113258
Sema6d	89.0022154044499	-0.380034575402095	0.148109153975352	-2.56590875851833	0.0102905893213505	0.116103658923989	ENSMUSG00000027200
Rpp14	1087.67107637541	-0.287851534798845	0.112175805409428	-2.56607504397425	0.0102856572583421	0.116103658923989	ENSMUSG00000023156
ENSMUSG00000024411	6.04231874233296	1.60977909906448	0.627582168123374	2.56504913751472	0.010316119450794	0.116306215635992	ENSMUSG00000024411
Ms4a1	18444.2609042167	0.135800348183644	0.0529467777414246	2.5648463226006	0.0103221511215	0.116306215635992	ENSMUSG00000024673
ENSMUSG00000114797	2081.01094472626	-0.260228890802033	0.101474332389675	-2.56447994949817	0.0103330549328968	0.116352376790518	ENSMUSG00000114797
Nup37	918.519910927173	-0.242418598345022	0.094577257831657	-2.5631806620627	0.0103718063524036	0.11671184067257	ENSMUSG00000035351
Zfp280c	874.777432036662	-0.192599740957903	0.0751493929544884	-2.5628915069819	0.0103804480136433	0.116732235458687	ENSMUSG00000036916
Fam120a	6660.84395646058	-0.112466114639572	0.0439188767119721	-2.56076937889702	0.0104440660334063	0.117370427816577	ENSMUSG00000038014
Cbx3	18776.0514736291	-0.246066484627842	0.0961373234896817	-2.55953125899383	0.0104813429201122	0.117711954358395	ENSMUSG00000029836
Gps1	1511.09896564399	-0.309725473382615	0.121107194632563	-2.55744899650526	0.0105443019439053	0.118341269289018	ENSMUSG00000025156
Ncapg	5276.54721935454	-0.134109383694849	0.05244876607945	-2.55695974795095	0.0105591435172598	0.118430078832363	ENSMUSG00000015880
Ppm1e	226.132201545998	0.3790101481765	0.148335402941816	2.55508894478255	0.0106160666804428	0.118958638250449	ENSMUSG00000046442
Ehd1	1529.12600978327	0.144954276323755	0.0567345972494329	2.55495382625993	0.0106201884964714	0.118958638250449	ENSMUSG00000024772
Lbh	1155.37896833621	0.368725283659752	0.144362559260467	2.55416144981523	0.0106443887477554	0.119151628595536	ENSMUSG00000024063
Pdss1	570.997695195524	-0.307370947256772	0.120357739855221	-2.55381122665241	0.0106551006569033	0.119193478748984	ENSMUSG00000026784
ENSMUSG00000026432	4.33480670305201	1.98513778832333	0.777540407192382	2.55309919582374	0.010676908359014	0.119359316272483	ENSMUSG00000026432
Tax1bp1	6694.63556542219	0.294988918335904	0.115559975357832	2.5526910803024	0.010689425790197	0.119421147079632	ENSMUSG00000004535
ENSMUSG00000113753	261.501075389328	0.359135065219986	0.140778321705252	2.55106795470902	0.0107393383996105	0.119900399258355	ENSMUSG00000113753
Pank4	669.374740947961	-0.237152043308347	0.0930293369309121	-2.5492178180789	0.0107964844244498	0.120302678140235	ENSMUSG00000029056
ENSMUSG00000054161	60.5365486050446	-0.628312542394657	0.246443107446375	-2.5495236969911	0.0107870179897659	0.120302678140235	ENSMUSG00000054161
Nsg2	6.80132740654317	1.22994750469938	0.482459059623242	2.54933031138406	0.0107930020888017	0.120302678140235	ENSMUSG00000020297
ENSMUSG00000113428	6.43930239478109	1.58691473643781	0.622719613939816	2.54836157544121	0.0108230229679328	0.120519825140635	ENSMUSG00000113428
Adamts6	80.8575154226771	0.609902059629595	0.239517401617983	2.54637890821125	0.0108846968338971	0.121127684232944	ENSMUSG00000046169
Gm7367	643.504616794362	0.38226730767584	0.150160850819249	2.54571884476054	0.0109052983006321	0.121198591962343	ENSMUSG00000047370
Gpx3	12.5810742912844	0.82189759573551	0.322868684986571	2.54560951233067	0.0109087140559715	0.121198591962343	ENSMUSG00000018339
Lbhd1	151.022796400274	-0.314022708742867	0.123364177434371	-2.54549347528318	0.0109123403165065	0.121198591962343	ENSMUSG00000096740
Dop1b	162.146708771409	0.585127762176955	0.229918418549498	2.5449364425364	0.0109297630025776	0.121313272079908	ENSMUSG00000022946
Gm13127	48.8452909437641	-0.538020091537083	0.211474965261032	-2.54413136265554	0.0109549877084965	0.121514344517411	ENSMUSG00000070610
Arsi	22.859089980805	0.8010995732918	0.315177758610299	2.54173891211124	0.0110302533578309	0.122269857746695	ENSMUSG00000036412
Ccp110	1087.78570078703	0.320197575222518	0.126001257087665	2.54122524348897	0.0110464729756368	0.122370293306908	ENSMUSG00000033904
Gm12940	612.475468468861	-0.317292229137456	0.124893851050676	-2.54049520026983	0.0110695613027869	0.122467321261189	ENSMUSG00000085334
Spic	5.37165226394458	1.4427555026857	0.56788715829622	2.54056722644383	0.0110672815003102	0.122467321261189	ENSMUSG00000004359
Ccdc191	558.179278270638	0.389627141635902	0.153428411811964	2.53947190767648	0.0111019960858423	0.122746713515719	ENSMUSG00000022701
Irf2	2528.6318363802	0.213239553181785	0.0839933503272129	2.53876708514504	0.0111243855588691	0.12279049231421	ENSMUSG00000031627
Uggt2	9.41448394995236	1.39537911622211	0.549649897044522	2.53866893039568	0.0111275067334412	0.12279049231421	ENSMUSG00000042104
Gm4853	4.85526821345437	1.93278385385192	0.761333120978265	2.53868352839873	0.0111270424894909	0.12279049231421	ENSMUSG00000081473
ENSMUSG00000022114	19.7523747283646	0.791238589205025	0.311803554697905	2.53761888626198	0.0111609452732765	0.123000668959456	ENSMUSG00000022114
9530082P21Rik	7.92120526425412	1.06907023000644	0.421264368255628	2.53776561837699	0.0111562672471836	0.123000668959456	ENSMUSG00000097006
Gm15921	18.1814200583836	0.807064036570497	0.318099910529337	2.53714009295852	0.011176221997075	0.123010407338057	ENSMUSG00000094092
Tomm70a	8287.83807984741	-0.128186908341731	0.050524031596724	-2.53714726023652	0.0111759931758884	0.123010407338057	ENSMUSG00000022752
Dph2	412.611034460656	-0.277927752370943	0.109588049476737	-2.5361136884724	0.0112090337928682	0.123292158701091	ENSMUSG00000028540
Soga1	16.0407168136522	1.08569281987635	0.428317179841503	2.53478700125478	0.0112515716791174	0.123521589409861	ENSMUSG00000055485
Ssx2ip	357.143261480206	0.237138489872542	0.0935428385751831	2.53507904490141	0.011242195529251	0.123521589409861	ENSMUSG00000036825
Rnf187	3122.34443396179	-0.228284433065824	0.0900577901137286	-2.53486603188394	0.0112490336917233	0.123521589409861	ENSMUSG00000020496
Itgav	545.563783743257	0.239443836544882	0.0944943705181532	2.53394816254036	0.0112785414795836	0.123738196091478	ENSMUSG00000027087
Gm43597	51.0501521448134	0.423897736664844	0.16736027411711	2.53284561644672	0.0113140771302494	0.124048441556993	ENSMUSG00000107096
Itga3	10.2569591190394	1.00256121133263	0.395972114294509	2.53189852300296	0.0113446817956578	0.124304260213577	ENSMUSG00000001507
Smim12	277.263192018197	-0.335645554435684	0.132615657908585	-2.53096474224072	0.0113749282047356	0.124396447730996	ENSMUSG00000042380
Cttn	18.5396170121642	0.846986350183792	0.33464054591967	2.53103325496938	0.0113727065545853	0.124396447730996	ENSMUSG00000031078
Rtl8b	225.170510909945	0.317164513463451	0.125297005854271	2.53130161651536	0.0113640081511709	0.124396447730996	ENSMUSG00000067924
Zfp287	96.5541890574819	0.354209884124609	0.139989568834214	2.53025912626454	0.0113978315166454	0.124567221300525	ENSMUSG00000005267
ENSMUSG00000015647	2.91261830195628	1.98745494728164	0.786072431494784	2.52833564395881	0.0114604731026916	0.124681131964991	ENSMUSG00000015647
Eif4e	6573.50579762512	-0.251912889884515	0.0995913344136462	-2.52946595572473	0.0114236255914232	0.124681131964991	ENSMUSG00000028156
Gm6658	31.7493799330553	0.531476644047366	0.210192479603236	2.52852359442446	0.0114543387231845	0.124681131964991	ENSMUSG00000074171
Gm23971	14.8481764618248	2.70516083758294	1.06983653205783	2.52857399847765	0.011452694117365	0.124681131964991	ENSMUSG00000065251
Psmd12	5983.98219117561	-0.188026453101309	0.0743732058499493	-2.528147750961	0.0114666085209715	0.124681131964991	ENSMUSG00000020720
Adcy6	9.58254184790216	1.38043678570209	0.545973887338271	2.52839342268178	0.011458586994337	0.124681131964991	ENSMUSG00000022994
Slc12a8	16.0121487048666	0.750395913097082	0.2967786637802	2.52846988236607	0.0114560914947685	0.124681131964991	ENSMUSG00000035506
1110038B12Rik	1613.67685631078	-0.483991330968237	0.191359860737648	-2.52922075247422	0.011431610131806	0.124681131964991	ENSMUSG00000092203
Rhbdf2	367.667916878814	0.285661791791996	0.113091528360446	2.52593448805054	0.011539099670037	0.125389593553682	ENSMUSG00000020806
Zfp768	124.08928180494	0.347377796408216	0.137564134704712	2.52520613133561	0.0115630443697462	0.125569960236386	ENSMUSG00000047371
Mtrr	704.639781281281	-0.325252405679317	0.128825674827525	-2.52474831678369	0.0115781175631809	0.125653818099969	ENSMUSG00000034617
Tmem238	289.351107210958	-0.650105269226591	0.257629707782912	-2.52340956647124	0.0116222949766865	0.126053228449557	ENSMUSG00000030431
Exoc8	435.35350813471	-0.263476490378636	0.104447301621354	-2.52257824078405	0.0116498030991418	0.126271454897674	ENSMUSG00000074030
Nop9	2118.09880066473	-0.227753816557905	0.0903277110328377	-2.52141689359435	0.0116883281640026	0.126608741005892	ENSMUSG00000019297
Ppm1j	3.19166538891809	1.98424023650859	0.787361798685588	2.5201124055308	0.0117317363383363	0.126943662852306	ENSMUSG00000002228
Cinp	1631.72388493967	-0.360166996735773	0.142933691614343	-2.51981875419239	0.0117415275826067	0.126943662852306	ENSMUSG00000021276
Bscl2	416.226399029506	0.357655265177033	0.141934518151544	2.51986105871133	0.0117401165722937	0.126943662852306	ENSMUSG00000071657
Calcrl	192.709987530248	0.287332889881589	0.11409223994007	2.51842623155194	0.0117880573488828	0.127254773881517	ENSMUSG00000059588
Abce1	8786.92951112615	-0.1890558722634	0.0750863829944256	-2.51784497699716	0.0118075277234006	0.127254773881517	ENSMUSG00000058355
Gm16172	9.86638359805879	1.08502570981476	0.430853228482921	2.5183186247327	0.0117916597220019	0.127254773881517	ENSMUSG00000086472
1110059E24Rik	1303.74018578618	-0.221033263361355	0.0877852362823261	-2.51788652308789	0.0118061351016654	0.127254773881517	ENSMUSG00000035171
ENSMUSG00000041020	9.54204855827484	1.00948728401828	0.4008981170764	2.51806441841156	0.0118001737113587	0.127254773881517	ENSMUSG00000041020
Ankrd49	1222.16175795619	-0.189815795623544	0.0754472882163529	-2.51587300366884	0.0118737959094087	0.127888338676447	ENSMUSG00000031931
Bzw1	16448.704658735	-0.285720573536738	0.113658571080868	-2.5138497767445	0.0119421290351543	0.128321880951225	ENSMUSG00000051223
Stxbp2	1810.78714306673	0.173557147250473	0.0690419614740377	2.51379224380432	0.0119440772593108	0.128321880951225	ENSMUSG00000004626
Tbx21	9.68002906029406	-1.04423679758798	0.415388770511737	-2.51387825506582	0.0119411647848393	0.128321880951225	ENSMUSG00000001444
Ints5	803.66538133405	-0.190636018679549	0.0758258850786071	-2.51412849954763	0.0119326946998912	0.128321880951225	ENSMUSG00000071652
Camk2d	3554.80527554199	0.166565503203286	0.0662781169900402	2.51312968393952	0.011966533681776	0.128482387074496	ENSMUSG00000053819
Naip5	83.485284711251	0.611215120748738	0.243246442830516	2.5127402219592	0.0119797513427923	0.128543559135185	ENSMUSG00000071203
Hdc	12.8248169446387	1.18128109200802	0.470677805598874	2.50974462351163	0.012081850113464	0.129314379454878	ENSMUSG00000027360
Glt1d1	17.0760468125161	-0.696712473504931	0.277588653290447	-2.5098737475265	0.0120774333336779	0.129314379454878	ENSMUSG00000049971
Ighv15-2	7.05639814463259	1.51970944674344	0.605384480221613	2.51032112053338	0.0120621416850002	0.129314379454878	ENSMUSG00000076688
AC132444.2	100.386526081942	-0.446769292495987	0.178000616210411	-2.50993115646223	0.0120754700793756	0.129314379454878	ENSMUSG00000094728
Pdf	9.22604466951753	-1.24795272357347	0.497484534260443	-2.50852566789572	0.0121236159669772	0.129680205083568	ENSMUSG00000078931
Gm19705	4.36823623367955	1.45612611936586	0.580535329394787	2.50824720845825	0.0121331749352996	0.129701287785539	ENSMUSG00000097113
1700001L05Rik	126.225424441701	-0.36493886975063	0.14552681765791	-2.50770872079737	0.0121516791135544	0.129817906929991	ENSMUSG00000075511
Ptges3	13554.9194028565	-0.369063507326813	0.147230990777834	-2.5066971659772	0.0121865070356839	0.130108660063051	ENSMUSG00000071072
Pdlim2	629.261302121249	0.163690699593282	0.0653658167134814	2.5042248046986	0.0122720032051282	0.130939669653718	ENSMUSG00000022090
Fam160a2	126.313351549513	0.425155753397525	0.169802853615878	2.50381983779435	0.0122860578106412	0.131007851626506	ENSMUSG00000044465
Bax	1998.43007207916	0.618515807845272	0.247312674636989	2.50094666095518	0.0123861831808724	0.131993160293424	ENSMUSG00000003873
Evi2a	1087.00793498037	0.283266280864768	0.113288691292124	2.50039326638829	0.0124055508440805	0.132117184160666	ENSMUSG00000078771
Scrn2	379.397763997134	-0.284555821834508	0.113830519980633	-2.49982009994262	0.012425638754476	0.132248719321456	ENSMUSG00000020877
Ankrd13d	53.5418036136118	0.499733082830595	0.199954565222352	2.49923317467088	0.0124462387225032	0.132385537326539	ENSMUSG00000005986
Mir146	20.7261783292636	0.976517749388949	0.390922553585326	2.49798263219368	0.0124902313023284	0.13277084804148	ENSMUSG00000065601
H2az1	13823.6449187534	-0.384183078362066	0.15383358012895	-2.49739411928154	0.0125109820852897	0.132900424914094	ENSMUSG00000037894
Ubiad1	253.65690769384	-0.248994393032261	0.0997095878320179	-2.49719609163108	0.0125179713398286	0.132900424914094	ENSMUSG00000047719
Mpp5	510.128655439691	0.287206338699323	0.11509725363356	2.49533615818249	0.0125837853742036	0.133516228057891	ENSMUSG00000021112
Jade1	1368.30782624998	-0.237248844735335	0.0950912934588315	-2.49495864558882	0.0125971810550306	0.133575444028311	ENSMUSG00000025764
Smarcd2	4128.35211565967	-0.13238941060764	0.0530695654937546	-2.4946390530222	0.012608531364114	0.133612911721513	ENSMUSG00000078619
Rbm14	932.359894264319	-0.280930463122183	0.112711299883588	-2.49247824674489	0.0126855100825585	0.134345367931333	ENSMUSG00000006456
Slc16a1	6413.21450062041	-0.551353508954055	0.221260905524971	-2.49187043524881	0.0127072381976692	0.134492150162699	ENSMUSG00000032902
Fance	221.138335532837	-0.26627251069831	0.106873492377493	-2.49147384234245	0.0127214333992073	0.134559072458323	ENSMUSG00000007570
Col27a1	17.1843832705032	0.715834622593016	0.287378377426788	2.49091330044614	0.012741520743875	0.134656267991249	ENSMUSG00000045672
Phactr2	118.709966797101	0.489788501060059	0.19664077907309	2.49077787104376	0.0127463781436752	0.134656267991249	ENSMUSG00000062866
Kif7	65.4022246171639	0.517747188111097	0.208073732254956	2.48828712062843	0.0128360057413847	0.135519361419079	ENSMUSG00000050382
Ipo13	419.384617348992	-0.240814593466786	0.0968104053996384	-2.48748667534952	0.0128649272727821	0.13564210314198	ENSMUSG00000033365
Them6	351.082626281486	-0.377038248452423	0.151562964869872	-2.48766741120522	0.0128583919255107	0.13564210314198	ENSMUSG00000056665
Scrib	1503.93615086771	-0.190565580509143	0.0766152322978544	-2.48730669859863	0.0128714380913994	0.13564210314198	ENSMUSG00000022568
Mynn	660.275194225789	0.217721200358929	0.0875821695168354	2.48590782301959	0.0129221431291859	0.136092540053712	ENSMUSG00000037730
ENSMUSG00000116165	91.7582422718755	-0.668307654848651	0.268886882973686	-2.48546023315705	0.0129384041921437	0.136179890921375	ENSMUSG00000116165
Gsto1	676.996287703205	-0.280626675332969	0.112919917456994	-2.48518314264484	0.0129484800366817	0.136202073395077	ENSMUSG00000025068
Evi5l	146.695546921024	0.379612724556835	0.152918786941873	2.48244661201198	0.0130483619171583	0.137168296586708	ENSMUSG00000011832
Wwc2	81.1594569194231	0.522981330095183	0.210807820442722	2.48084406449845	0.0131071698786289	0.13754587756265	ENSMUSG00000031563
Gm5431	80.3191124087454	0.794786231227829	0.320348127501676	2.48100788796922	0.0131011473858669	0.13754587756265	ENSMUSG00000058163
Slc25a32	1262.06403044921	-0.278992505850351	0.112460244983648	-2.4808100488392	0.013108420672179	0.13754587756265	ENSMUSG00000022299
Hnrnph1	23311.365972078	-0.115966894788497	0.0467515139498906	-2.48049496135661	0.0131200118069946	0.137583044059484	ENSMUSG00000007850
Megf8	18.617884980045	0.766590100814844	0.309115782482005	2.47994487586369	0.0131402695481098	0.137710991652876	ENSMUSG00000045039
Fmo5	17.3448431593859	0.740322612699102	0.29881065271483	2.47756432367098	0.0132282562275132	0.138548151775051	ENSMUSG00000028088
Idh3a	4542.2527579481	-0.348468099095269	0.140693687611855	-2.47678559720903	0.0132571512899055	0.138765760562372	ENSMUSG00000032279
Gnb4	245.35379787682	0.30593057326956	0.123548934792606	2.47618948543027	0.0132793080279291	0.138912614517375	ENSMUSG00000027669
Afap1	28.9396931116504	0.716877802563832	0.289563747101831	2.4757166936085	0.0132969043870564	0.139011612653184	ENSMUSG00000029094
Idi1	25403.0937986223	-0.253565451800044	0.102435395736916	-2.47536947532544	0.0133098402759277	0.139061796966034	ENSMUSG00000058258
Bivm	80.6694520996263	0.401388342331926	0.162220398867718	2.4743395105275	0.0133482778855368	0.139185476209515	ENSMUSG00000041684
Ccdc63	4.53447586157961	1.5286190350318	0.617903492090353	2.47387990940223	0.0133654615339555	0.139185476209515	ENSMUSG00000043036
ENSMUSG00000113570	23.7087211206893	-1.49570494649263	0.604631989026562	-2.47374431660598	0.01337053483508	0.139185476209515	ENSMUSG00000113570
ENSMUSG00000109695	31.7886135376658	0.627117699759124	0.253468271309816	2.47414675027548	0.013355482461109	0.139185476209515	ENSMUSG00000109695
Slit1	3.51376510155175	1.73794022365238	0.702405094949529	2.47427052586693	0.0133508558500937	0.139185476209515	ENSMUSG00000025020
Rtl5	14.8759169616087	1.07276777084873	0.433554079836022	2.47435745790805	0.013347607262028	0.139185476209515	ENSMUSG00000049191
Bet1l	241.089583658244	0.310621800664279	0.125597407714848	2.47315455243713	0.0133926210888171	0.139271813390968	ENSMUSG00000025484
Gm43814	7.01421538177765	1.04229162579317	0.421453553725569	2.47308776158015	0.0133951243909642	0.139271813390968	ENSMUSG00000104654
Rnf170-ps	22.6095156309623	0.791710453452109	0.32035732652044	2.4713355616095	0.0134609442403283	0.13974783576836	ENSMUSG00000101800
Zfp358	132.989326894494	0.301030326233209	0.121814641877418	2.47121628068435	0.0134654352957637	0.13974783576836	ENSMUSG00000047264
Arih2	1400.51770503215	0.195830482317359	0.0792342436551144	2.47153848239856	0.0134533070950363	0.13974783576836	ENSMUSG00000064145
Vps18	442.361828972054	0.165130058373488	0.0668451740148211	2.47033627793197	0.0134986092857939	0.139994524064456	ENSMUSG00000034216
Usp35	53.380960341911	0.509113790602127	0.206124401129382	2.46993460169018	0.0135137755049641	0.139994524064456	ENSMUSG00000035713
Mrpl54	1364.41707042257	-0.346820799287553	0.140407903097224	-2.47009457186609	0.0135077336563887	0.139994524064456	ENSMUSG00000034932
4632415L05Rik	358.303219516004	0.237874242198508	0.0963246073991277	2.46950648044544	0.0135299567903019	0.140077257066402	ENSMUSG00000048106
Itgb5	108.810153019524	0.402250280827828	0.162939912225768	2.46870318839055	0.0135603642448956	0.140307085979419	ENSMUSG00000022817
Zfp326	1398.35920369772	0.267664195356037	0.108451192320368	2.46806134288823	0.0135847037524217	0.140473890647396	ENSMUSG00000029290
Shmt2	10224.6100645383	-0.197434783192844	0.0800753416213082	-2.46561274913508	0.0136779120336759	0.141219323003768	ENSMUSG00000025403
Rhot2	626.260970421802	-0.258037148507078	0.104658444026489	-2.46551676653791	0.0136815771891558	0.141219323003768	ENSMUSG00000025733
Tnf	500.14738150682	-0.275091933069595	0.111558967460081	-2.46588812475367	0.0136674014564366	0.141219323003768	ENSMUSG00000024401
Aifm2	49.7361022872061	0.463132898923586	0.187907902945624	2.46468025912463	0.013713556489813	0.141463983753997	ENSMUSG00000020085
Prdm1	299.069292494807	-0.508200637544663	0.206366360992118	-2.46261374722827	0.0137928414665303	0.142196042935708	ENSMUSG00000038151
Usp27x	28.1802807215857	0.657868334437344	0.267171735748806	2.46234255503685	0.0138032761697936	0.142217841814516	ENSMUSG00000046269
Cd55os	10.6809398836444	1.09727200127897	0.445958066562503	2.46048246135981	0.0138750353460328	0.142871071788999	ENSMUSG00000087691
Fhdc1	3.15353965148705	2.20302591104238	0.895455458411209	2.46022947355882	0.0138848205768326	0.142885754436966	ENSMUSG00000041842
Mto1	361.776480629821	-0.18588201161331	0.0755721859611902	-2.45966170290176	0.0139068033724729	0.143025866453477	ENSMUSG00000032342
Ddx25	39.3151407956481	0.947753780802181	0.385402030941804	2.4591302191277	0.0139274090599535	0.143151655479125	ENSMUSG00000032101
Gm19585	278.566043114132	0.543059319181015	0.220873155403131	2.45869317251271	0.0139443735982613	0.143239890573967	ENSMUSG00000100150
Clp1	906.226630404585	-0.153651502292268	0.0625059301209326	-2.4581907987769	0.0139638964280341	0.143354283269902	ENSMUSG00000027079
Crem	1177.90839348866	0.541413962574923	0.220283027637103	2.45781061020668	0.013978687034975	0.143419986487891	ENSMUSG00000063889
Lman2	4371.67438160037	-0.153197512510949	0.0623461747973327	-2.45720788819754	0.0140021632773276	0.143574671205375	ENSMUSG00000021484
Gm24497	12.2088895583131	2.25298314771662	0.9177712807909	2.45484163088552	0.0140946667146656	0.14392656263807	ENSMUSG00000093956
Zfp446	120.376247411151	-0.326409182069678	0.132953944826265	-2.45505451151681	0.0140863226102386	0.14392656263807	ENSMUSG00000033961
Gm44705	86.1798840537253	0.528765596694835	0.215301834531536	2.45592703771126	0.0140521684633338	0.14392656263807	ENSMUSG00000108506
Gm44777	81.6897131102858	-0.369878338254624	0.150649576704711	-2.4552232163229	0.0140797131254215	0.14392656263807	ENSMUSG00000108738
Cdr2	556.39554386357	-0.196654511825239	0.0801094680304618	-2.45482234073082	0.0140954230302539	0.14392656263807	ENSMUSG00000030878
ENSMUSG00000113690	5.94180368864529	1.34120636561401	0.546218513211057	2.45543923022576	0.0140712541697762	0.14392656263807	ENSMUSG00000113690
ENSMUSG00000041700	5.84375993011636	1.67894343785729	0.683790320949886	2.45534835229166	0.0140748123403765	0.14392656263807	ENSMUSG00000041700
Snhg17	1084.52810825256	-0.266415675395704	0.108573627558079	-2.45377889076415	0.0141363873278406	0.144086624087525	ENSMUSG00000085385
Fdx2	15.2432017347869	-0.835767467491515	0.340568512928756	-2.45403622403094	0.014126275058085	0.144086624087525	ENSMUSG00000079677
Zfa-ps	10.5372306619437	1.1793201260469	0.48061158846726	2.45379045022182	0.0141359329458337	0.144086624087525	ENSMUSG00000049576
Arl5b	181.745150843809	0.28757272681205	0.117227130190859	2.45312434368945	0.0141621374616959	0.144177138554358	ENSMUSG00000017418
Gm10717	7.02059217175326	-3.83610169097646	1.56362770029592	-2.45333444160044	0.0141538676222487	0.144177138554358	ENSMUSG00000095891
Lamtor3	749.870665662075	-0.239601764431816	0.097691250553664	-2.45264302661575	0.0141810990593769	0.144284241798768	ENSMUSG00000091512
Lancl1	325.360711313242	0.286254664360954	0.116762393650676	2.45159982945671	0.014222272960741	0.144531100902465	ENSMUSG00000026000
4930520O04Rik	15.0801709386545	0.856204959245047	0.349216581686419	2.45178781348327	0.0142148456462527	0.144531100902465	ENSMUSG00000074039
D11Wsu47e	439.25078111133	-0.202132244319479	0.0824683051858788	-2.45102944535946	0.0142448299954591	0.144596512155753	ENSMUSG00000041623
Scarna13	7.73559827481179	-1.18324846915931	0.482759687283078	-2.45100927092425	0.0142456284134024	0.144596512155753	ENSMUSG00000088789
Prob1	80.9219695073518	0.331639633784112	0.135366416685748	2.44994025773771	0.0142879919008737	0.144940442469813	ENSMUSG00000073600
AC133103.1	164.723387995634	-0.345943801089971	0.141225280433493	-2.44958834585488	0.0143019619671492	0.144996106704912	ENSMUSG00000079190
Sinhcaf	2180.33046482257	-0.220592608766795	0.0900636394866178	-2.44929707509291	0.0143135338371968	0.145027405974633	ENSMUSG00000039985
Nup35	592.352570425911	-0.387252837590399	0.15812920238652	-2.44896471838153	0.0143267480954811	0.145075299286765	ENSMUSG00000026999
Tmem9	217.013214642157	0.277108401853437	0.113225215160375	2.44740892265856	0.0143887485806043	0.145444636007256	ENSMUSG00000026411
Nfs1	810.070096513419	-0.208567074385361	0.0852159863281384	-2.44751112288061	0.0143846685184651	0.145444636007256	ENSMUSG00000027618
Fam57a	75.4007136923072	-0.489029062583365	0.199809515506126	-2.44747634438046	0.0143860568396597	0.145444636007256	ENSMUSG00000069808
Dynlt1-ps1	156.018727987133	0.30014850689341	0.122673985451477	2.44671684700529	0.014416404661866	0.145638064353	ENSMUSG00000082691
Ptgr1	124.313298569775	0.536760092082396	0.219407866967232	2.44640312811829	0.014428956637849	0.145678768937243	ENSMUSG00000028378
Cplx2	33.0122376092693	0.649613595668348	0.265587390213914	2.44595044646181	0.0144470855385003	0.145775698411798	ENSMUSG00000025867
Myo5c	9.53494959906584	1.50895547520912	0.617212837198679	2.44478951873029	0.0144936699740433	0.146159469537653	ENSMUSG00000033590
Fam214b	95.5141167019754	0.390453863930285	0.159755811702498	2.44406672764682	0.0145227402019215	0.146308372326598	ENSMUSG00000036002
Thra	154.685657966139	0.421686498396753	0.172539708660192	2.44399681482738	0.0145255547790463	0.146308372326598	ENSMUSG00000058756
Gapdh	56443.1425191315	-0.220768350772071	0.0903493940064994	-2.44349564487604	0.014545745156944	0.146344322197996	ENSMUSG00000057666
Zfp36l2	2416.93997672923	-0.401466382060121	0.164300856893906	-2.44348319083545	0.0145462472014506	0.146344322197996	ENSMUSG00000045817
ENSMUSG00000060314	8.98476202361799	1.18347361524907	0.484411983443001	2.4431138281044	0.0145611438170266	0.146408018390844	ENSMUSG00000060314
ENSMUSG00000031963	5.9364397185169	1.33916925275143	0.548290761563171	2.4424435840091	0.0145882095051379	0.146593924204187	ENSMUSG00000031963
Cyb5a	682.953588181947	-0.226106031756196	0.0925902940051389	-2.4420057651361	0.0146059133758389	0.14659945821093	ENSMUSG00000024646
Vma21	1311.4806672907	-0.303006695190709	0.124071058383003	-2.44220287260982	0.0145979406931454	0.14659945821093	ENSMUSG00000073131
Bmf	53.1611566540631	0.67768429800164	0.27754330267645	2.44172455781309	0.0146172944080881	0.146627589975029	ENSMUSG00000040093
Uap1l1	284.027483523219	-0.284556330054962	0.11657772200654	-2.440915169358	0.0146500956511657	0.146870431064736	ENSMUSG00000026956
Glt28d2	12.7170652260749	1.20658225144914	0.494906611050835	2.43799986604989	0.0147687794797286	0.147545752296331	ENSMUSG00000031286
Noc4l	1865.446037179	-0.299788818987338	0.122965648143623	-2.43798836108429	0.0147692495278197	0.147545752296331	ENSMUSG00000033294
Msmo1	6054.71275999504	-0.363715702014957	0.149176164881778	-2.43816230497144	0.0147621442650233	0.147545752296331	ENSMUSG00000031604
2010315B03Rik	334.557228990389	0.181097321162095	0.0742697160465364	2.43837368448563	0.0147535138860914	0.147545752296331	ENSMUSG00000074829
Mrpl38	1502.75323715283	-0.142191261015517	0.0583038460421602	-2.43879727784505	0.0147362324468918	0.147545752296331	ENSMUSG00000020775
Cby1	543.124378304248	0.266833398786427	0.109409574336692	2.43884870592116	0.0147341355384148	0.147545752296331	ENSMUSG00000022428
Iars2	2876.16909373216	-0.161921575695198	0.0664341337954968	-2.43732500815979	0.0147963738506013	0.147644143740997	ENSMUSG00000026618
Cdk2	1703.26053663617	-0.236498707387043	0.0970297462647733	-2.43738354980017	0.0147939783337549	0.147644143740997	ENSMUSG00000025358
Ighm	53271.729193301	-0.21558022997612	0.0884585727242272	-2.43707560880729	0.0148065830725588	0.147653880602401	ENSMUSG00000076617
Wiz	1609.89629108118	-0.41988896520893	0.172306021453441	-2.43687923188679	0.0148146261763949	0.147653880602401	ENSMUSG00000024050
Nampt	6586.09211964225	-0.179256165844294	0.0735913801475061	-2.43583101016714	0.0148576238556105	0.147996133195775	ENSMUSG00000020572
Ttpal	1785.04792346307	-0.177580264291587	0.0729279790086626	-2.43500871278077	0.0148914311283443	0.14824649521071	ENSMUSG00000017679
Gstt3	45.3452241571213	0.599073811950256	0.246268029956979	2.43260894260173	0.0149904811881459	0.149145689725832	ENSMUSG00000001665
Pds5a	5592.22937193861	-0.179967136282681	0.0740016182208952	-2.43193514695149	0.015018396126372	0.14924967731865	ENSMUSG00000029202
Dus3l	750.763870900252	-0.190567876248276	0.0783541080050996	-2.43213637549002	0.0150100545604976	0.14924967731865	ENSMUSG00000007603
Insig1	4891.94224338671	-0.506785453290462	0.208447467900513	-2.43123823184236	0.0150473170531036	0.149363409052671	ENSMUSG00000045294
Cacnb3	13.2298512714616	0.947152211211862	0.389550554643376	2.43139741407622	0.015040706911044	0.149363409052671	ENSMUSG00000003352
Phldb1	35.7956122432643	0.756156376221701	0.311141278324354	2.4302669844836	0.0150877041722653	0.14967738097303	ENSMUSG00000048537
Trim30d	1983.14358014437	0.41200254302974	0.169587348987931	2.42944149719011	0.0151221052138135	0.149931638294498	ENSMUSG00000057596
Irgm1	2487.13492423544	0.252581154235527	0.103982721001535	2.4290685202573	0.0151376711555022	0.149998964093332	ENSMUSG00000046879
Rbmxl1	10062.7720544827	-0.225428813762257	0.0928231161996339	-2.42858485032359	0.0151578778079737	0.150112169972013	ENSMUSG00000037070
Adrb2	58.1778975716305	0.617650604242233	0.254360331665976	2.42825050666048	0.0151718598228914	0.150163636336238	ENSMUSG00000045730
Pdrg1	961.29398193391	0.415394529291729	0.171135764296745	2.42728065053337	0.0152124827951099	0.150478569685656	ENSMUSG00000027472
Il6	578.861483312631	0.554381774720442	0.228437378265155	2.42684353554852	0.0152308228923384	0.150572848871452	ENSMUSG00000025746
Pole2	1074.84956016919	-0.235875666018356	0.0972123016602573	-2.42639729735756	0.0152495658527098	0.150670999491543	ENSMUSG00000020974
Efnb1	27.9632973958162	0.568907402840179	0.234501995306055	2.42602371931925	0.0152652725449842	0.150739054657085	ENSMUSG00000031217
Snx17	1189.53821445966	-0.143586167779846	0.0592081685604478	-2.42510740107176	0.0153038585023273	0.15085862363338	ENSMUSG00000029146
Kansl2-ps	543.814504370664	-0.290808264315233	0.11990477017943	-2.42532689800461	0.0152946077229498	0.15085862363338	ENSMUSG00000097530
Zfp809	632.933128701194	0.371597409798515	0.15322690570149	2.42514464478219	0.0153022885054711	0.15085862363338	ENSMUSG00000057982
Eif5a2	302.751700647978	-0.273537709002776	0.112866918341119	-2.42354192905365	0.0153699788658655	0.151423082855469	ENSMUSG00000050192
ENSMUSG00000115428	3.16602718925079	1.94090212149218	0.800957569100219	2.42322714257205	0.0153833047315658	0.151467066691621	ENSMUSG00000115428
Agap3	870.863682444726	-0.244079794826714	0.100748628051672	-2.42266122672687	0.0154072872420555	0.151528631086568	ENSMUSG00000023353
Mon1b	1281.87363371761	0.13224896742984	0.0545856732776266	2.42277798346853	0.0154023366055914	0.151528631086568	ENSMUSG00000078908
Ift22	101.634158541483	0.392264146745421	0.162007768651102	2.42126751088213	0.0154664908253214	0.151936223725513	ENSMUSG00000007987
Tdp1	668.130234229374	-0.294688701751156	0.121708465048517	-2.42126709620144	0.015466508470274	0.151936223725513	ENSMUSG00000021177
App	406.863707371431	0.400788249617761	0.16556831180247	2.42068210549805	0.0154914178807578	0.15209351282929	ENSMUSG00000022892
Ubtf	11766.1113434294	-0.216567522690996	0.0894837455022372	-2.42018839818883	0.01551246782987	0.152212751214677	ENSMUSG00000020923
Uhrf1	8061.98453243576	-0.319964697886824	0.13222798549765	-2.41979560289459	0.0155292332197223	0.152289835585033	ENSMUSG00000001228
Reck	11.424987726495	1.14567611338039	0.473677294879198	2.41868488476437	0.0155767274989941	0.15266800638779	ENSMUSG00000028476
Acat1	3787.27020703461	-0.178682564904039	0.073902540012541	-2.41781358088256	0.0156140738395276	0.152946340480828	ENSMUSG00000032047
Nr4a2	19.9557958489336	0.712619265902983	0.294949439086391	2.41607262624512	0.0156889317028556	0.153591586252526	ENSMUSG00000026826
Laptm5	13030.2433966294	0.452193936428662	0.187179663885442	2.41582833862451	0.0156994608422795	0.153606688137998	ENSMUSG00000028581
Tyw3	314.477791591256	-0.294058921383604	0.121778367665612	-2.41470572336011	0.0157479270974181	0.15393894613824	ENSMUSG00000047583
Usp28	539.194024546828	-0.268885401996175	0.111357017564758	-2.41462467185606	0.0157514313927211	0.15393894613824	ENSMUSG00000032267
Tanc1	206.164411373495	0.257682944998017	0.106726967104419	2.41441270176735	0.0157605992499367	0.153940527416667	ENSMUSG00000035168
Gm5837	530.245815051223	-0.184377725770289	0.0763785159065914	-2.41399984775532	0.0157784689538804	0.154027053014665	ENSMUSG00000104496
Ska3	619.43463950923	-0.152058032046623	0.0630034483589033	-2.41348745199492	0.0158006719400612	0.154155756547641	ENSMUSG00000021965
ENSMUSG00000117929	102.092047704261	0.36815260868892	0.152575686618146	2.41291792191179	0.0158253828961995	0.154308767738014	ENSMUSG00000117929
Tmeff1	40.7290078780561	-0.476955722074043	0.197707777532699	-2.41242771542035	0.015846679345176	0.154362952962032	ENSMUSG00000028347
Bhlha15	143.310229263968	-0.576985119544819	0.239218454720213	-2.41195906151828	0.0158670630289762	0.154362952962032	ENSMUSG00000052271
Arrdc4	3.6559803991796	1.82567950177909	0.756912928257678	2.41200729122382	0.0158649642570955	0.154362952962032	ENSMUSG00000042659
Zfp995	158.828645775438	0.347801013430396	0.144197006054984	2.41198498461041	0.0158659349250445	0.154362952962032	ENSMUSG00000078546
Bcr	361.103649353732	0.281335548719221	0.116678178046659	2.41120964887466	0.0158997059809638	0.154592533750065	ENSMUSG00000009681
Socs2	2337.82349541951	-0.222287103732899	0.092200158245445	-2.41091889605169	0.0159123864977218	0.154627869474451	ENSMUSG00000020027
Gars	12985.1668199863	-0.144517574259103	0.0599630711120367	-2.41010961545119	0.0159477282481074	0.154795297526917	ENSMUSG00000029777
Acy1	501.894661502087	-0.332740369224917	0.13805928614477	-2.41012668192418	0.0159469822335783	0.154795297526917	ENSMUSG00000023262
Paxx	195.801089957479	-0.323637019206235	0.134322181060936	-2.40940860734994	0.0159783974422282	0.154917043380605	ENSMUSG00000047617
Dancr	300.720139037209	-0.674367783336679	0.279866287022035	-2.40960706811958	0.0159697095001898	0.154917043380605	ENSMUSG00000106943
Stard7	3427.76449596201	-0.147618202252327	0.0613065261578608	-2.40787093159084	0.0160458526412194	0.155394764417202	ENSMUSG00000027367
Rrp1b	3614.92147362883	-0.296800976215455	0.123261732490544	-2.40789229729693	0.0160449136518957	0.155394764417202	ENSMUSG00000058392
Ly9	2437.29227100046	0.204559676127696	0.0850069165703468	2.40638861378314	0.0161111162405283	0.155938454076642	ENSMUSG00000004707
Gm15564	54.5835622996123	2.30752647628021	0.959005229816673	2.40616672833091	0.0161209054803965	0.155944899477316	ENSMUSG00000086324
Rasal1	140.387541419638	-0.338418625496229	0.140697069558075	-2.40529974475795	0.0161592055848797	0.156226980238885	ENSMUSG00000029602
Nkrf	1049.25091355545	-0.192508493862374	0.080059539245362	-2.40456659727187	0.0161916556959658	0.156452216399742	ENSMUSG00000044149
Rragd	17.6770694655933	0.830822132971749	0.345620430226288	2.40385712276264	0.0162231125213158	0.156667605834379	ENSMUSG00000028278
Gm5530	21.9449635796997	0.693086343692932	0.288504874348466	2.40233841891974	0.0162906297073404	0.157169164651024	ENSMUSG00000087008
Adat1	213.47249451412	-0.245706751297338	0.102286658242972	-2.40213880791457	0.0162995221695561	0.157169164651024	ENSMUSG00000031949
Csrnp1	1276.18340323433	0.197419177683541	0.0821871395395171	2.40206897076176	0.0163026343489303	0.157169164651024	ENSMUSG00000032515
Stk38l	290.823388333771	0.302475818266182	0.125935587660827	2.40182956926216	0.0163133068513671	0.157183401358747	ENSMUSG00000001630
Mrpl57	572.400410897469	-0.330829523862793	0.137752926305282	-2.40161521599637	0.0163228679138528	0.157186919014921	ENSMUSG00000021967
Tmem108	44.2559734923806	0.541890224363754	0.225714825086967	2.40077373807841	0.0163604490077361	0.157460109734929	ENSMUSG00000042757
Gtf2h4	603.8414985269	-0.32481114337895	0.13530854088198	-2.40052210497385	0.0163717019038817	0.157479741498621	ENSMUSG00000001524
Thg1l	1626.43148584277	-0.301516903139342	0.125653405594401	-2.39959197057193	0.0164133560545927	0.157791617008522	ENSMUSG00000011254
Batf3	343.252492402368	-0.515976739598727	0.215092337230638	-2.39886155984003	0.0164461312253622	0.157929938973615	ENSMUSG00000026630
Fam234b	162.80022194387	0.375998101913493	0.156753798962191	2.39865384062675	0.016455462546774	0.157929938973615	ENSMUSG00000030207
H2-Aa	25667.4223417794	-0.141690799529367	0.0590679827798927	-2.39877498538176	0.0164500198243263	0.157929938973615	ENSMUSG00000036594
Cpne5	7.84437754616402	1.04685508511742	0.436555507374783	2.39798849729937	0.0164853829224626	0.158039624393523	ENSMUSG00000024008
Tcf19	848.881745068059	-0.244244020310701	0.101853620803834	-2.39799055137279	0.0164852904776449	0.158039624393523	ENSMUSG00000050410
Stap1	1678.8573869007	0.386506085360506	0.161261995999881	2.39675865949712	0.016540814336915	0.158482140953413	ENSMUSG00000029254
Ppp2r1a	2448.47105699617	-0.147921734360599	0.0617253418693848	-2.39645062920205	0.0165547235286043	0.158526548613128	ENSMUSG00000007564
Pih1d1	427.038152852674	-0.24181174432896	0.100927236045103	-2.39590177839504	0.0165795324955333	0.158617085284804	ENSMUSG00000003423
Renbp	223.546136230936	0.272198212358288	0.113613280993431	2.39583092731936	0.0165827374600097	0.158617085284804	ENSMUSG00000031387
Ctdsp1	1369.26938247921	-0.129611558285538	0.0541108226760724	-2.39529823934559	0.0166068511494212	0.158619410102766	ENSMUSG00000026176
Rcc1	4518.82455082667	-0.347325761943879	0.145027102205763	-2.3949024469309	0.0166247877925025	0.158619410102766	ENSMUSG00000028896
Igkv5-48	100.609340236701	-0.40957507257719	0.17102675361106	-2.39480118712084	0.0166293794479703	0.158619410102766	ENSMUSG00000076563
Bid	1261.15452102332	-0.181118680004182	0.0756278097778567	-2.39486877295781	0.0166263146250093	0.158619410102766	ENSMUSG00000004446
N4bp1	1088.57521285229	0.227445852895053	0.0949627451763005	2.39510612791147	0.0166155551912354	0.158619410102766	ENSMUSG00000031652
Cyp20a1	334.26118595441	-0.271831333666402	0.113584375578646	-2.39321061793561	0.0167016505406583	0.15913116649469	ENSMUSG00000049439
Fabp5	4475.49638247482	-0.341669938013539	0.142764368026631	-2.39324379560736	0.0167001402267315	0.15913116649469	ENSMUSG00000027533
Tnp2	28.919560915965	0.6784471182945	0.283540215322307	2.39277210650099	0.0167216237280473	0.15923270996296	ENSMUSG00000043050
Slx4ip	284.730566659654	0.32970250875977	0.137827952955993	2.39213092619203	0.0167508657654139	0.159333638579977	ENSMUSG00000027281
Gm8995	2902.93255619719	0.280900017428214	0.117423841732952	2.39218895654123	0.0167482173534769	0.159333638579977	ENSMUSG00000063286
Evl	2790.20281062985	0.178728691996065	0.0747368943577373	2.39143857303674	0.0167824920246134	0.159545681967029	ENSMUSG00000021262
Mndal	13399.9237055368	0.231131346882614	0.0966851083949705	2.39055787100547	0.0168227976845103	0.159662454648159	ENSMUSG00000090272
Rtca	1459.79420147276	-0.173483300421588	0.0725672532917838	-2.39065546168646	0.0168183272279604	0.159662454648159	ENSMUSG00000000339
Ldha	42680.7268808394	-0.267261854765129	0.111791600701498	-2.39071498295083	0.0168156011760793	0.159662454648159	ENSMUSG00000063229
ENSMUSG00000048330	10.6281809934349	0.913507424141931	0.38223546029287	2.38990758063629	0.0168526129782189	0.159856666835014	ENSMUSG00000048330
ENSMUSG00000118495	7.33833329660859	1.17773575211578	0.492992982402876	2.38895033835051	0.0168965861617325	0.160184884782304	ENSMUSG00000118495
Abhd17a	1057.43776609755	-0.394627331790801	0.165265877465534	-2.38783309563161	0.0169480366764235	0.160583586978995	ENSMUSG00000003346
AI182371	20.7908870116798	0.69081865456453	0.289508378736691	2.3861784504442	0.0170244878879508	0.161218599151658	ENSMUSG00000035875
Chchd4	1288.55733700212	-0.357125258035465	0.149717371238232	-2.38532947166967	0.0170638314357681	0.161501700294343	ENSMUSG00000034203
Gbp4	2289.62728605704	0.220918470090174	0.092687810226238	2.3834684361508	0.0171503551457454	0.162230780578985	ENSMUSG00000079363
ENSMUSG00000100349	6.04561452371386	1.24207438865457	0.521357501977587	2.38238518472103	0.0172008949467547	0.162359105920487	ENSMUSG00000100349
Gm12522	6.82060616921262	1.22807576080474	0.515530326581657	2.38216007377835	0.017211414024918	0.162359105920487	ENSMUSG00000074281
Gbp8	131.335475216076	0.489489135726041	0.205441341543883	2.38262236825144	0.0171898178373057	0.162359105920487	ENSMUSG00000034438
Fancf	125.171276111647	-0.440912876337712	0.185040175309856	-2.38279538807931	0.01718174129334	0.162359105920487	ENSMUSG00000092118
Dnajc28	45.890543783506	0.517500146979135	0.217234129940579	2.38222302876941	0.0172084716695739	0.162359105920487	ENSMUSG00000039763
Apoo-ps	60.1652972942579	0.403057380947687	0.169217113358031	2.38189490973584	0.0172238119588223	0.162386441153971	ENSMUSG00000049233
Kiz	296.723151470329	0.33008942298763	0.138637789028106	2.38094840736902	0.0172681302610721	0.162714526214171	ENSMUSG00000074749
Suv39h2	680.396050973837	-0.187790586717665	0.0789120102794546	-2.37974658170074	0.017324547733236	0.162976606716677	ENSMUSG00000026646
Gm20186	56.0857988396748	0.724069871448655	0.304249227499629	2.37985771533155	0.0173193239971292	0.162976606716677	ENSMUSG00000106874
Fbxo32	83.1580033697015	0.421099927114933	0.176945428520707	2.37982936680195	0.0173206563629445	0.162976606716677	ENSMUSG00000022358
Tars	11184.0435179359	-0.191167090822239	0.0803395513124967	-2.37948915197019	0.0173366532932932	0.163000778186062	ENSMUSG00000022241
Pop7	215.284148380661	-0.331790664733506	0.139467134835489	-2.37898817613825	0.0173602328063951	0.16313274291353	ENSMUSG00000029715
ENSMUSG00000049410	22.3935131273407	0.947640305645437	0.39848943848825	2.37808135954745	0.0174029856282054	0.163354878277274	ENSMUSG00000049410
Elof1	566.226819092102	-0.301757559259316	0.126887723517772	-2.37814621378286	0.0173999249446456	0.163354878277274	ENSMUSG00000013822
Yipf3	890.664034229896	0.184617352538906	0.0776456784500873	2.37768999156319	0.0174214655860978	0.163438590155417	ENSMUSG00000071074
Fsip1	17.7915628450698	0.708417387180645	0.298023692073557	2.37705057021371	0.0174516953689721	0.163542669376009	ENSMUSG00000027344
Mctp2	118.756128712202	0.478917719036699	0.201472310693281	2.37708952356136	0.0174498524653935	0.163542669376009	ENSMUSG00000032776
ENSMUSG00000110148	79.513838438845	0.461028448608847	0.193980123088907	2.37667881258919	0.0174692920074542	0.163617867552556	ENSMUSG00000110148
Tmem87a	1000.31131502288	0.202664807706869	0.0853377618153199	2.37485496919239	0.0175558466950797	0.164338492639101	ENSMUSG00000033808
Klhl8	90.984917590436	0.412621350175239	0.173807644693313	2.37401151660112	0.0175960016510033	0.164624223437657	ENSMUSG00000029312
Cry1	963.245959423389	-0.160885678389902	0.0678010283941004	-2.37290911658061	0.0176486058983025	0.164935823192829	ENSMUSG00000020038
Limd2	2350.12249384316	-0.217081272342248	0.0914756682037153	-2.37310398059963	0.0176392973738157	0.164935823192829	ENSMUSG00000040699
Apex1	2185.36360220617	-0.263413000500208	0.111054587733649	-2.37192362671205	0.0176957480697597	0.165286022817707	ENSMUSG00000035960
Abraxas1	719.877226102248	-0.208943835877247	0.0881194684257832	-2.37114271806151	0.0177331821733359	0.165545211845347	ENSMUSG00000035234
C030034I22Rik	134.864995976559	0.435667517914016	0.183782476712363	2.37056070691592	0.0177611269245313	0.165715579978719	ENSMUSG00000073374
ENSMUSG00000113529	6.16612498706992	1.34879123870109	0.569060433501846	2.37020737920749	0.0177781104603642	0.165783547244411	ENSMUSG00000113529
Exd1	13.2032369243896	0.85899327023248	0.362642432052429	2.3687059050726	0.0178504412105414	0.166276616682171	ENSMUSG00000048647
Auh	4813.3776131209	0.131386793162074	0.0554668747401104	2.36874339464204	0.0178486320857997	0.166276616682171	ENSMUSG00000021460
Exosc5	529.087020735467	-0.29979450927158	0.12658046280707	-2.36841059531057	0.0178646975177234	0.16631877705362	ENSMUSG00000061286
ENSMUSG00000110105	6.91616530337265	-1.15358987374388	0.487130945979203	-2.36813095793986	0.0178782064225643	0.16635393706091	ENSMUSG00000110105
Ttc13	971.784535869675	-0.174579596730142	0.0737355276667881	-2.36764558760696	0.0179016752589295	0.166481684004832	ENSMUSG00000037300
Trim30a	6194.48157954919	0.324251407176208	0.136971047074238	2.36729888616872	0.017918455637729	0.166547124641491	ENSMUSG00000030921
Cbs	21.1152187660829	0.714377101637578	0.30190719190631	2.36621425652976	0.0179710408213588	0.166945109108416	ENSMUSG00000024039
Ddx20	1839.21470843325	-0.220651008660606	0.0932754168295343	-2.36558587632857	0.0180015678525607	0.167137859480619	ENSMUSG00000027905
Cdh5	12.9103393566084	0.916525642211216	0.387538410782475	2.36499303478246	0.0180304100287362	0.16722398188887	ENSMUSG00000031871
Timm23	7371.40976529944	-0.357676486706728	0.151229166199317	-2.36512900054821	0.0180237916199668	0.16722398188887	ENSMUSG00000013701
Asf1b	1179.58514675276	-0.242503968324275	0.102601265148422	-2.36355729116469	0.0181004277739484	0.167782327516323	ENSMUSG00000005470
Slc35a4	1877.81916537007	-0.230318193501504	0.097486709652697	-2.36255992557374	0.0181492069371367	0.168143303076682	ENSMUSG00000033272
Tle1	275.576584952862	-0.301722233628649	0.127732634050551	-2.36213897780609	0.0181698291744306	0.168243169056632	ENSMUSG00000008305
ENSMUSG00000064347	8.15668436876207	-1.142881430886	0.483956702615877	-2.36153652735567	0.0181993789265072	0.168425546286296	ENSMUSG00000064347
ENSMUSG00000074224	10.4095924363595	1.59017983150496	0.673551023294614	2.36088993485117	0.0182311406226111	0.168628185423318	ENSMUSG00000074224
Fkbp11	257.485705330479	-0.805295276553924	0.34114261865583	-2.36058244416059	0.0182462620958041	0.168676775556289	ENSMUSG00000003355
Egr2	674.903854631084	0.30080908512464	0.127455318081899	2.36011403566031	0.018269318130898	0.1687986242224	ENSMUSG00000037868
ENSMUSG00000111722	3.1810096878478	1.69239266263093	0.717275798852047	2.35947269563464	0.0183009275812898	0.168964374450825	ENSMUSG00000111722
Srebf1	1561.46183661658	-0.222822785247069	0.0944424844469413	-2.35934904245613	0.018307027524889	0.168964374450825	ENSMUSG00000020538
Lrrc57	310.54353418062	0.246948458651923	0.104695622461129	2.35872764158415	0.018337708850139	0.16914314715701	ENSMUSG00000027286
Nubp2	1108.89422740833	-0.241660564908641	0.102461233942859	-2.35855606661356	0.0183461881956998	0.16914314715701	ENSMUSG00000039183
Dtymk	1524.02696557872	-0.285072627683218	0.120878199692155	-2.35834607405821	0.0183565708339228	0.169147636261047	ENSMUSG00000026281
Noc2l	13440.175699513	-0.204694205455884	0.0868086054069873	-2.35799440039626	0.018373970114963	0.16921674093484	ENSMUSG00000095567
Gm8010	6.63954974814223	1.18505432214345	0.502629405750575	2.35770989238843	0.0183880568938627	0.169255280822183	ENSMUSG00000102493
ENSMUSG00000054679	4.54658985978535	1.65358954556085	0.701608985714639	2.3568534315115	0.0184305197197695	0.169375213849825	ENSMUSG00000054679
1700029J07Rik	60.4526176448198	-0.396907821115692	0.168391865555266	-2.35704866031921	0.018420832845687	0.169375213849825	ENSMUSG00000071103
Ado	1061.138030915	-0.165296136209382	0.0701403617924124	-2.35664789837544	0.0184407226920098	0.169375213849825	ENSMUSG00000057134
Zxda	432.867304198337	0.372540629750675	0.15807836526015	2.35668321302276	0.0184389692684567	0.169375213849825	ENSMUSG00000073060
Cyp51	10281.4909015378	-0.289264354577806	0.122798249225067	-2.35560650419076	0.0184924950726757	0.169712410793576	ENSMUSG00000001467
Homer1	370.779874971158	-0.158837028568366	0.0674321143156455	-2.35551013312233	0.0184972925354492	0.169712410793576	ENSMUSG00000007617
Pcmtd1	1239.54222528813	0.238048019955028	0.101192687239908	2.3524231488256	0.0186515434998026	0.171035854636333	ENSMUSG00000051285
Il18	6.72091049044219	1.11067260413701	0.472233574586349	2.35195603173684	0.0186749822514488	0.171158966018238	ENSMUSG00000039217
ENSMUSG00000001240	4.33944516985228	-1.50071151200621	0.638390601192826	-2.35077319309235	0.0187344493741743	0.171611973822487	ENSMUSG00000001240
Atad3a	3311.60107493992	-0.323959559203546	0.137822625037796	-2.3505542657797	0.0187454740767201	0.171613918115085	ENSMUSG00000029036
ENSMUSG00000073130	4.19710794248342	1.74788278219273	0.743662719222181	2.35037031844341	0.0187547416509085	0.171613918115085	ENSMUSG00000073130
Fads3	26.2789701119715	-0.561876399030191	0.239082735736606	-2.35013371960576	0.0187666677884107	0.171631167740666	ENSMUSG00000024664
Gm4076	111.484006757416	0.650604750710389	0.276885220953013	2.34972725691559	0.0187871716691038	0.171726804994648	ENSMUSG00000096449
Mrpl20	1791.52809175841	-0.370453797221552	0.157711972708106	-2.34892627909227	0.0188276340994246	0.172004676462568	ENSMUSG00000029066
Gm20775	260.373567260222	-0.27247345715295	0.116011181854665	-2.34868271141567	0.0188399533387927	0.172025279070504	ENSMUSG00000075359
Nsun6	174.657694363943	0.210808262080393	0.0898196532719372	2.34701709927728	0.0189243862750486	0.172275330115082	ENSMUSG00000026707
Oas2	184.088924063083	0.875576630465159	0.37306038657702	2.34701046256594	0.0189247233629204	0.172275330115082	ENSMUSG00000032690
3110082I17Rik	1015.98116684232	-0.349755914788365	0.148964354700514	-2.34791682541459	0.0188787365011095	0.172275330115082	ENSMUSG00000053553
Pfn1	18730.8574944751	-0.326038995242678	0.138915103090907	-2.34703778054511	0.0189233358781407	0.172275330115082	ENSMUSG00000018293
Trim27	6539.80425923741	-0.198202527065728	0.084451119120864	-2.34694968082148	0.0189278107971757	0.172275330115082	ENSMUSG00000021326
Slc39a6	3143.19952581388	-0.323739741482825	0.137916968864071	-2.34735249874799	0.0189073577020216	0.172275330115082	ENSMUSG00000024270
Sfxn2	208.207718582788	-0.236191008410247	0.100650830362931	-2.34663745503719	0.0189436773807257	0.172327981622536	ENSMUSG00000025036
Sfmbt1	864.999448593328	0.30771084339195	0.131148429530679	2.34627928441924	0.018961893095858	0.172401935472075	ENSMUSG00000006527
Ms4a6b	131.000129004889	0.469060036574962	0.199941317842426	2.34598852121515	0.0189766918903248	0.172444760489804	ENSMUSG00000024677
ENSMUSG00000113843	88.036077929837	0.541371887588912	0.230791714855316	2.3457163006406	0.0189905560846362	0.172479051623106	ENSMUSG00000113843
Antxr2	45.7777063929787	0.455588386510089	0.194281278787256	2.34499376035594	0.0190273980224738	0.172630209340841	ENSMUSG00000029338
Urb2	945.260505757186	-0.314477018439405	0.134097896679135	-2.34513013423227	0.019020439611868	0.172630209340841	ENSMUSG00000031976
Eif4a3	5906.93098298688	-0.217887378057577	0.0929399344027507	-2.34438919564299	0.0190582724535689	0.172818594720877	ENSMUSG00000025580
Rpa1	4820.58811214118	-0.17950938230351	0.0765776265416388	-2.34414920402244	0.0190705406913201	0.172838150602723	ENSMUSG00000000751
Hps1	377.804566245911	-0.240497132243345	0.102613465667879	-2.34371903022693	0.0190925482156954	0.172945907075189	ENSMUSG00000025188
Ap2m1-ps	1899.03652561617	-0.104248416385532	0.0444930934056803	-2.34302469003477	0.0191281172320214	0.173176328308762	ENSMUSG00000081272
Palm	218.311033976588	0.456649052480629	0.194994879745918	2.34185150438643	0.0191883477332637	0.173629660034239	ENSMUSG00000035863
Gm8181	17.7567206199478	0.653323686293205	0.279157974718413	2.34033681807662	0.0192663557640418	0.174243290515749	ENSMUSG00000048188
Arl6ip4	4364.45539448692	-0.283648264253488	0.121231323757165	-2.33972751812606	0.019297813474504	0.174369639774781	ENSMUSG00000029404
Taf6l	338.180763154042	-0.296093015545744	0.126553264799571	-2.33967109433866	0.0193007288629196	0.174369639774781	ENSMUSG00000003680
Gm38247	7.62558091551938	1.05955166397893	0.453120176276544	2.3383458063723	0.0193693165998665	0.174804502978627	ENSMUSG00000104166
Gbp10	581.077567049201	0.738740110078831	0.315904508946883	2.33849182001718	0.0193617495183991	0.174804502978627	ENSMUSG00000105096
Klf6	1113.4050065612	0.431060200775389	0.184395516958761	2.33769349648448	0.0194031537907099	0.175017471105332	ENSMUSG00000000078
Dctpp1	744.031484553821	-0.47303488347097	0.202425357843898	-2.33683609854727	0.0194477080414983	0.175279666524189	ENSMUSG00000042462
Cnnm2	34.0853245837082	0.520061710955757	0.222558697737776	2.33673954890096	0.0194527307901706	0.175279666524189	ENSMUSG00000064105
Zfp964	20.5988851101324	-0.623613227116061	0.266975591186267	-2.33584360407305	0.0194993941124709	0.175607557199402	ENSMUSG00000091764
B4galt4	41.4043910456449	0.519253663132094	0.222376618242325	2.33501915460491	0.0195424201201212	0.175902362882165	ENSMUSG00000022793
Liph	10.5817005405215	1.02871553050198	0.440665833590404	2.33445720563434	0.0195717943738495	0.176074042753795	ENSMUSG00000044626
Dtx1	557.884623962783	-0.411268663475084	0.17631604102803	-2.33256521118066	0.0196709766022091	0.176841669694616	ENSMUSG00000029603
Gm12319	38.2403282830586	0.453451064763974	0.19441100971401	2.33243510967319	0.0196778128917779	0.176841669694616	ENSMUSG00000087523
Smc6	7338.77312200312	-0.215392643243407	0.0923882443094762	-2.33138582568902	0.0197330242626982	0.177244657762638	ENSMUSG00000020608
Nop10	948.071137527938	-0.481776279067804	0.206676306119281	-2.33106681706297	0.0197498366966486	0.17730249929402	ENSMUSG00000027133
Dhps	810.837339565568	-0.383402220333921	0.164581350488585	-2.32956054374164	0.0198293895817428	0.177736631421463	ENSMUSG00000060038
ENSMUSG00000114829	5.28979148882061	1.18373756469238	0.508099176910737	2.32973722155888	0.019820043992182	0.177736631421463	ENSMUSG00000114829
Gm8783	205.851539137528	0.494892935714804	0.212425673019489	2.32972280930187	0.0198208062020845	0.177736631421463	ENSMUSG00000094388
Galk1	3181.32133373945	-0.456611723248839	0.196039806316429	-2.32917860830682	0.0198496056741063	0.177824585842504	ENSMUSG00000020766
ENSMUSG00000113450	154.498538037701	0.249023586880808	0.107013696161381	2.32702537911848	0.0199639145242708	0.178754945502023	ENSMUSG00000113450
Slc31a1	1302.66162684352	-0.233225453965777	0.100271411586933	-2.32594166447508	0.0200216629435903	0.179178159526068	ENSMUSG00000066150
ENSMUSG00000116627	26.1406949620512	-0.520722244980923	0.223924288401094	-2.32543887355445	0.0200485048811573	0.179324486621466	ENSMUSG00000116627
Cs	5221.49178291099	-0.156168785833378	0.0671642784268337	-2.32517626171631	0.0200625371284554	0.179356143899942	ENSMUSG00000005683
ENSMUSG00000112023	86.855884997529	0.41126550928345	0.176917111727895	2.32462256062597	0.0200921513605742	0.179526995925925	ENSMUSG00000112023
Wdr1	8575.4529956868	-0.218256631600586	0.0939133233444005	-2.32402202188279	0.0201243137845658	0.179720426081287	ENSMUSG00000005103
Cd200	292.00332104707	0.399839801857847	0.172150417484519	2.32261883357793	0.0201996380543041	0.180298910319697	ENSMUSG00000022661
Slc16a6	663.729307377104	-0.245981538469292	0.105960078381887	-2.32145485569347	0.0202623078729143	0.180763897949751	ENSMUSG00000041920
Gins2	1273.04271468706	-0.267367095988944	0.115246482388475	-2.31995884340919	0.0203431038588653	0.181387715789944	ENSMUSG00000031821
Atf6b	1255.24187424231	-0.175110065671358	0.0754860407392126	-2.31976752200217	0.020353456905465	0.181387715789944	ENSMUSG00000015461
Mre11a	2477.45781235189	-0.165827156224781	0.0714946337623173	-2.31943500509522	0.020371461452938	0.181453564676951	ENSMUSG00000031928
Gm8774	5.98290517423706	1.21122868080773	0.522322643647795	2.31892814822032	0.0203989325865679	0.181603622240732	ENSMUSG00000107733
Gpm6b	13.3109028896219	0.896440756606562	0.386693347236947	2.31822130639674	0.0204372966536044	0.181850448568485	ENSMUSG00000031342
Rgs10	211.348547752706	-0.47264710970358	0.203979188518698	-2.31713398379489	0.0204964342963256	0.182186974221057	ENSMUSG00000030844
Tulp4	878.224387469569	0.474327873671085	0.204696098859421	2.31722967029694	0.0204912240867362	0.182186974221057	ENSMUSG00000034377
ENSMUSG00000026479	4.26737936459551	1.81563371051805	0.783836335231436	2.3163428753044	0.0205395550929168	0.182432033104638	ENSMUSG00000026479
Dpy19l1	1519.27742763215	-0.353078330446418	0.152436205819628	-2.3162366745352	0.0205453497763077	0.182432033104638	ENSMUSG00000043067
Gm15801	219.13253645243	0.456166075146999	0.197000250683537	2.31556088667008	0.0205822565228401	0.18266485500774	ENSMUSG00000096592
Acox3	570.952083937061	0.275704919577834	0.119080569821936	2.31528048606168	0.0205975869799296	0.18270604787127	ENSMUSG00000029098
Itpr2	442.301289141518	0.271367048990781	0.11723434615244	2.31474015846792	0.0206271566127069	0.18287343774948	ENSMUSG00000030287
Dazap1	4735.35422750143	-0.182166917632961	0.0787259487061213	-2.3139374072579	0.0206711558193843	0.183073609544423	ENSMUSG00000069565
Ajuba	4.71574835828879	1.45222656319001	0.627594677179047	2.31395615035737	0.0206701275682241	0.183073609544423	ENSMUSG00000022178
Shq1	384.892295945135	-0.208000688423132	0.0899301116669406	-2.31291482427454	0.0207273226108104	0.183286148673866	ENSMUSG00000035378
Nxpe2	45.6613822147456	-0.521549133066102	0.225493618772214	-2.31292191728473	0.0207269325595958	0.183286148673866	ENSMUSG00000032028
ENSMUSG00000112690	387.697730491533	-0.34767869460449	0.150308287199138	-2.31310396175204	0.0207169239547527	0.183286148673866	ENSMUSG00000112690
Klc4	162.99003841396	0.406112002668622	0.175609420128477	2.31258666176056	0.0207453755701261	0.183350933102464	ENSMUSG00000003546
Rbm10	4054.19667739794	-0.117667827043093	0.0509016299092014	-2.31167110469722	0.0207958149141144	0.183701738670262	ENSMUSG00000031060
Osgin2	410.033749150435	-0.173680511109971	0.075155804368289	-2.3109394220422	0.0208362011738892	0.183963422864302	ENSMUSG00000041153
Uap1	1089.39737188071	-0.21267763796399	0.0920538002928906	-2.31036238903018	0.0208680995270054	0.184054914971674	ENSMUSG00000026670
Gm42546	126.593924082301	0.983950188602284	0.425850754999669	2.31055170632033	0.0208576293894738	0.184054914971674	ENSMUSG00000106714
Cops8	1284.05893208113	-0.221778056095661	0.0960132460570246	-2.30986936910707	0.0208953873508352	0.184125253397158	ENSMUSG00000034432
Gm43388	129.825887122622	-0.27706447834769	0.119950207667316	-2.30982908438253	0.0208976184163392	0.184125253397158	ENSMUSG00000104927
ENSMUSG00000117028	21.410995849723	0.735865813038909	0.318883710833044	2.30763061279158	0.02101969034242	0.185105392592986	ENSMUSG00000117028
Bmpr2	46.8755734156714	0.541527654726928	0.234878346210401	2.30556653460866	0.021134865022071	0.18545084590465	ENSMUSG00000067336
Ifi203-ps	20.3512382615024	0.913842325319074	0.396235954076491	2.3063084405073	0.0210934038526757	0.18545084590465	ENSMUSG00000090222
Adss	6464.40750727167	-0.16668303890705	0.0722837683603428	-2.30595391867391	0.0211132073408889	0.18545084590465	ENSMUSG00000015961
Frmd4a	31.8903776121662	0.626562618816156	0.271711579419224	2.30598423576726	0.0211115132035858	0.18545084590465	ENSMUSG00000026657
Gm14137	15.2115351574725	0.970508482719451	0.420924899356221	2.30565709988595	0.0211298000095504	0.18545084590465	ENSMUSG00000055926
Gm24060	10.3243300247446	0.952616097281991	0.413088863968566	2.30608031436664	0.0211061450563795	0.18545084590465	ENSMUSG00000088119
Acsl5	8712.894999109	-0.202958533577701	0.088009940046034	-2.30608648831646	0.0211058001433152	0.18545084590465	ENSMUSG00000024981
Cep78	486.114083555458	-0.192780812344831	0.0836232881012047	-2.30534838706078	0.0211470696261372	0.185462730179355	ENSMUSG00000041491
Pdik1l	738.455933381304	-0.176279597234036	0.0764775516387216	-2.30498484139211	0.021167422396461	0.185546026165491	ENSMUSG00000050890
Idh3b	3707.46060274672	-0.095577324470887	0.0414743486088463	-2.30449247973242	0.0211950140155742	0.185692657390164	ENSMUSG00000027406
Styx	1089.21012044038	-0.211681233438944	0.0918701491703663	-2.30413507924535	0.0212150621206365	0.185773082391414	ENSMUSG00000053205
Tet1	34.2414802556926	0.691675392103739	0.300241118830437	2.30373306227375	0.0212376326914382	0.185875502096647	ENSMUSG00000047146
Adam8	25.1956618823572	0.660053224187144	0.286713582671223	2.30213447872832	0.0213275895640206	0.186281291986614	ENSMUSG00000025473
Gja1	11.4404046994985	1.44506366196954	0.627649484665832	2.30234182816052	0.0213159027190731	0.186281291986614	ENSMUSG00000050953
Utp15	2755.66579338633	-0.195164546951028	0.0847699980341795	-2.3022832544167	0.0213192035481339	0.186281291986614	ENSMUSG00000041747
Tbl3	1522.70846789559	-0.308479955030926	0.133986952358941	-2.30231339395294	0.0213175050274828	0.186281291986614	ENSMUSG00000040688
Tapbpl	1073.05278081523	0.217941752254933	0.0946886702552671	2.30166662671883	0.0213539796296156	0.186416534121052	ENSMUSG00000038213
Fkbp1a	3329.67831790481	-0.318847002339827	0.138579064362391	-2.30083096466886	0.0214011874727751	0.186446767052941	ENSMUSG00000032966
Samhd1	8303.21509309177	0.141902497242154	0.0616723232565701	2.30091051786406	0.0213966894789337	0.186446767052941	ENSMUSG00000027639
Rell1	139.123377077473	0.381006818064194	0.165609047650704	2.30064011277813	0.021411981730821	0.186446767052941	ENSMUSG00000047881
Rab11fip4	13.4908135403975	-0.881266046039789	0.383009635345545	-2.30089784880927	0.0213974057411221	0.186446767052941	ENSMUSG00000017639
Spire1	215.173132202915	-0.223963337419503	0.0973323065374954	-2.30101746672597	0.0213906438120573	0.186446767052941	ENSMUSG00000024533
Igkv3-5	93.8322989864663	-0.464571816375332	0.201955078710923	-2.30037203986495	0.0214271514846272	0.186483859636829	ENSMUSG00000095335
Ctnna1	1077.84100327793	0.167475432079111	0.0729004880091188	2.29731565114025	0.0216007695994365	0.187899213619933	ENSMUSG00000037815
Polr2e	1906.03384075657	-0.374320877957089	0.16295858948503	-2.29703066981613	0.0216170202029267	0.187944926921987	ENSMUSG00000004667
Slc8b1	62.1375155293621	0.443085716469905	0.192937394124314	2.29652586778701	0.0216458318528221	0.187948759552906	ENSMUSG00000032754
Sdr42e1	75.485494619815	0.405391000275868	0.176529806955953	2.29644504385041	0.0216504479938965	0.187948759552906	ENSMUSG00000034308
Gm5620	1255.70628022728	-0.437020859428571	0.190296295977102	-2.29652845939344	0.0216456838511832	0.187948759552906	ENSMUSG00000056904
Poldip2	1227.57386507431	-0.213344315122168	0.0929542960301869	-2.29515282492037	0.0217243676438184	0.188399094944591	ENSMUSG00000001100
Cks2	2224.56865995762	-0.282788597116447	0.123206888147727	-2.29523366240189	0.0217197370117539	0.188399094944591	ENSMUSG00000062248
Pid1	4.80676025652169	1.92539480455812	0.839204559026864	2.29430927638286	0.0217727401171801	0.188639205816791	ENSMUSG00000045658
Mri1	983.825322092016	-0.231746627435111	0.101010387040894	-2.29428511486932	0.0217741270155343	0.188639205816791	ENSMUSG00000004996
Ipo4	888.235443155635	-0.287974761157233	0.125531166519894	-2.29404990920398	0.021787632105834	0.18865662994796	ENSMUSG00000002319
Mrps34	575.572285253838	-0.436127906944339	0.190127914220428	-2.29386573103993	0.0217982123762488	0.18865662994796	ENSMUSG00000038880
Wls	193.718071000896	0.282641345153924	0.123241853162451	2.29338765931539	0.0218256964788993	0.188749801539135	ENSMUSG00000028173
Oaz2	816.924548154732	0.245850994726516	0.107204289786077	2.29329437485294	0.0218310628703487	0.188749801539135	ENSMUSG00000040652
Gpatch2	742.002888773512	0.206673384695036	0.0901677291720415	2.29209925316739	0.0218999164935449	0.189058218497052	ENSMUSG00000039210
Ncln	887.341836943519	-0.227977662868269	0.0994558797538177	-2.29224922078595	0.0218912661703873	0.189058218497052	ENSMUSG00000020238
Nol10	2600.25532243347	-0.214763305440567	0.0936933475070012	-2.29219374859586	0.0218944655304077	0.189058218497052	ENSMUSG00000061458
Preb	2183.73699984404	-0.106456051085807	0.0464526195441084	-2.29171254776543	0.0219222358769842	0.189155364889092	ENSMUSG00000045302
Pabpc4	12272.9924514583	-0.215516096219166	0.0940610976889116	-2.29123518132802	0.0219498152147404	0.189266618863946	ENSMUSG00000011257
Lyar	13567.6780784343	-0.340714120760721	0.148724054052844	-2.29091469386425	0.0219683479685291	0.189266618863946	ENSMUSG00000067367
Mlx	608.421549702808	-0.188663725400704	0.0823490215619126	-2.29102570768082	0.0219619268579745	0.189266618863946	ENSMUSG00000017801
Fitm2	192.316175591482	-0.266585291491727	0.116411908089597	-2.29001736906974	0.0220203097956635	0.189618718054043	ENSMUSG00000048486
Actl6a	3105.79755363504	-0.186575103202538	0.0815403174263506	-2.28813314801059	0.0221297683839088	0.190465322752343	ENSMUSG00000027671
Mrps11	405.766851586765	-0.183198675380918	0.0801076206129516	-2.28690696314727	0.0222012541104557	0.190984416965284	ENSMUSG00000030611
Igf1r	21.755329358763	0.607287604776961	0.265585968449053	2.28659521556561	0.0222194607660526	0.191044247014351	ENSMUSG00000005533
1110032A03Rik	77.8529280719417	0.405052754519216	0.177157027627005	2.2864052301218	0.0222305626462028	0.191044247014351	ENSMUSG00000037971
Adrm1	3741.34255495307	-0.192314866969554	0.0841435879822352	-2.28555581692282	0.022280257483698	0.191129766692384	ENSMUSG00000039041
Gm20633	6.81226882379946	1.1049839475852	0.483451630696595	2.28561427333083	0.0222768344046136	0.191129766692384	ENSMUSG00000093553
Eif4a1	30550.065980803	-0.329368178677373	0.1440887640453	-2.28586996952672	0.0222618667705472	0.191129766692384	ENSMUSG00000059796
Trim23	555.075659114141	0.149334620495087	0.0653463161224102	2.28527986513188	0.022296422792056	0.191129766692384	ENSMUSG00000021712
ENSMUSG00000064348	131.667423186912	-0.756256286380939	0.330911122794392	-2.28537584350354	0.0222907992044795	0.191129766692384	ENSMUSG00000064348
ENSMUSG00000025813	7.74536610010472	1.10140475769502	0.482004932069726	2.28504872961692	0.0223099706020083	0.191150038847182	ENSMUSG00000025813
Aoc2	123.371077956362	-0.345371027794745	0.151158615079437	-2.28482529833478	0.0223230736383025	0.191166481813379	ENSMUSG00000078651
Arvcf	36.2940498162227	0.600337736475788	0.262802744337851	2.28436631431828	0.0223500115613426	0.191301325797711	ENSMUSG00000000325
Cpeb4	637.321616915289	0.332137494550231	0.14541688405064	2.28403666272045	0.022369376357353	0.191371246284402	ENSMUSG00000020300
Xrcc5	1067.60310863627	-0.202683264462664	0.0887732292997318	-2.28315750211507	0.0224210924271193	0.191587001653482	ENSMUSG00000026187
[truncated: 20,381 more rows]
